# Supplementary material for: Transcription Factors and ncRNAs Associated with CYP3A Expression in Human Liver and Small Intestine Assessed with Weighted Gene Co-Expression Network Analysis
Source: Biomedicines. 2022 Nov 28;10(12):3061. doi: 10.3390/biomedicines10123061 (PMC9775998; doi:10.3390/biomedicines10123061)
Supplement: Supplementary file 1 [file biomedicines-10-03061-s001.zip]

Archive with 10 entries (10 files):
- Figure S1.pdf
- Figure S2.PDF
- Table S1.XLSX
- Table S2.xlsx
- Table S3.XLSX
- Table S4.pdf
- Table S5.pdf
- Table S6.pdf
- Table S7.pdf
- Table S8.XLSX
