# Supplementary material for: Transcription Factors and ncRNAs Associated with CYP3A Expression in Human Liver and Small Intestine Assessed with Weighted Gene Co-Expression Network Analysis
Source: Biomedicines. 2022 Nov 28;10(12):3061. doi: 10.3390/biomedicines10123061 (PMC9775998; doi:10.3390/biomedicines10123061)
Supplement: Supplementary file 1 [file biomedicines-10-03061-s001.zip › Table S1.XLSX]

## Sheet: a-Liver_turquoise_CYP3A4
Table S1-1: The TFs, lncRNAs, and miRNAs co-expressed with CYP3A4 in turquoise module in the first group.
From Node	To Node	Weight	direction	From Name	To Name	Type
ENSG00000160868.14	ENSG00000197114.11	0.162577	undirected	CYP3A4	ZGPAT	humanTF
ENSG00000160868.14	ENSG00000144331.18	0.156978	undirected	CYP3A4	ZNF385B	humanTF
ENSG00000160868.14	ENSG00000184517.11	0.152958	undirected	CYP3A4	ZFP1	humanTF
ENSG00000160868.14	ENSG00000205143.2	0.151805	undirected	CYP3A4	ARID3C	humanTF
ENSG00000160868.14	ENSG00000229005.2	0.15174	undirected	CYP3A4	HNF4A-AS1	lncRNA
ENSG00000160868.14	ENSG00000125520.13	0.147652	undirected	CYP3A4	SLC2A4RG	humanTF
ENSG00000160868.14	ENSG00000162599.15	0.144608	undirected	CYP3A4	NFIA	humanTF
ENSG00000160868.14	ENSG00000197905.8	0.142793	undirected	CYP3A4	TEAD4	humanTF
ENSG00000160868.14	ENSG00000274225.1	0.140033	undirected	CYP3A4	KB-68A7.1	lncRNA
ENSG00000160868.14	ENSG00000251637.6	0.138295	undirected	CYP3A4	RP11-119D9.1	lncRNA
ENSG00000160868.14	ENSG00000232667.10	0.13138	undirected	CYP3A4	AC004862.6	lncRNA
ENSG00000160868.14	ENSG00000261058.1	0.128591	undirected	CYP3A4	RP11-252E2.2	lncRNA
ENSG00000160868.14	ENSG00000167491.17	0.127931	undirected	CYP3A4	GATAD2A	humanTF
ENSG00000160868.14	ENSG00000276075.1	0.115489	undirected	CYP3A4	AC027682.6	lncRNA
ENSG00000160868.14	ENSG00000258604.1	0.11512	undirected	CYP3A4	AL161668.5	lncRNA
ENSG00000160868.14	ENSG00000143257.11	0.114637	undirected	CYP3A4	NR1I3	humanTF
ENSG00000160868.14	ENSG00000257702.3	0.112718	undirected	CYP3A4	LBX2-AS1	lncRNA
ENSG00000160868.14	ENSG00000118922.17	0.111551	undirected	CYP3A4	KLF12	humanTF
ENSG00000160868.14	ENSG00000029153.14	0.110875	undirected	CYP3A4	ARNTL2	humanTF
ENSG00000160868.14	ENSG00000250436.1	0.110385	undirected	CYP3A4	LINC02499	lncRNA
ENSG00000160868.14	ENSG00000169083.16	0.1073	undirected	CYP3A4	AR	humanTF
ENSG00000160868.14	ENSG00000151623.14	0.104754	undirected	CYP3A4	NR3C2	humanTF
ENSG00000160868.14	ENSG00000107175.11	0.104484	undirected	CYP3A4	CREB3	humanTF
ENSG00000160868.14	ENSG00000261469.1	0.104458	undirected	CYP3A4	RP11-96D1.6	lncRNA
ENSG00000160868.14	ENSG00000279428.1	0.103992	undirected	CYP3A4	RP11-258F1.2	lncRNA
ENSG00000160868.14	ENSG00000228170.1	0.1037	undirected	CYP3A4	RP1-40E16.11	lncRNA
ENSG00000160868.14	ENSG00000091831.22	0.103584	undirected	CYP3A4	ESR1	humanTF
ENSG00000160868.14	ENSG00000279372.1	0.103164	undirected	CYP3A4	RP11-1182P23.5	lncRNA
ENSG00000160868.14	ENSG00000100105.17	0.102023	undirected	CYP3A4	PATZ1	humanTF
ENSG00000160868.14	ENSG00000279108.1	0.0996863	undirected	CYP3A4	CTC-490E21.11	lncRNA
ENSG00000160868.14	ENSG00000228923.1	0.0994583	undirected	CYP3A4	AP000355.2	lncRNA
ENSG00000160868.14	ENSG00000264569.1	0.0978617	undirected	CYP3A4	DCXR-DT	lncRNA
ENSG00000160868.14	ENSG00000100644.16	0.0971987	undirected	CYP3A4	HIF1A	humanTF
ENSG00000160868.14	ENSG00000262881.1	0.0968801	undirected	CYP3A4	RP11-669E14.4	lncRNA
ENSG00000160868.14	ENSG00000207926.1	0.0964991	undirected	CYP3A4	MIR135A1	miRNA
ENSG00000160868.14	ENSG00000278058.1	0.0964907	undirected	CYP3A4	RP11-70D24.2	lncRNA
ENSG00000160868.14	ENSG00000032219.18	0.0952896	undirected	CYP3A4	ARID4A	humanTF
ENSG00000160868.14	ENSG00000225756.1	0.094858	undirected	CYP3A4	DBH-AS1	lncRNA
ENSG00000160868.14	ENSG00000230333.6	0.0945988	undirected	CYP3A4	AC004538.3	lncRNA
ENSG00000160868.14	ENSG00000233376.1	0.0926726	undirected	CYP3A4	RP5-881L22.6	lncRNA
ENSG00000160868.14	ENSG00000279619.1	0.0922646	undirected	CYP3A4	CTD-2527I21.5	lncRNA
ENSG00000160868.14	ENSG00000196693.14	0.0918906	undirected	CYP3A4	ZNF33B	humanTF
ENSG00000160868.14	ENSG00000175727.13	0.0906859	undirected	CYP3A4	MLXIP	humanTF
ENSG00000160868.14	ENSG00000144852.17	0.0899073	undirected	CYP3A4	NR1I2	humanTF
ENSG00000160868.14	ENSG00000243678.11	0.0891997	undirected	CYP3A4	NME2	humanTF
ENSG00000160868.14	ENSG00000029993.14	0.0878503	undirected	CYP3A4	HMGB3	humanTF
ENSG00000160868.14	ENSG00000278965.1	0.0840695	undirected	CYP3A4	RP11-39H3.2	lncRNA
ENSG00000160868.14	ENSG00000253196.1	0.083999	undirected	CYP3A4	RP11-706C16.7	lncRNA
ENSG00000160868.14	ENSG00000060566.13	0.0814294	undirected	CYP3A4	CREB3L3	humanTF
ENSG00000160868.14	ENSG00000189403.14	0.080951	undirected	CYP3A4	HMGB1	humanTF
ENSG00000160868.14	ENSG00000108924.13	0.0804266	undirected	CYP3A4	HLF	humanTF
ENSG00000160868.14	ENSG00000060138.12	0.0801972	undirected	CYP3A4	YBX3	humanTF
ENSG00000160868.14	ENSG00000279317.2	0.0800984	undirected	CYP3A4	AC006994.2	lncRNA
ENSG00000160868.14	ENSG00000074219.13	0.0800885	undirected	CYP3A4	TEAD2	humanTF
ENSG00000160868.14	ENSG00000005436.13	0.0797955	undirected	CYP3A4	GCFC2	humanTF
ENSG00000160868.14	ENSG00000223991.1	0.079215	undirected	CYP3A4	AC104809.2	lncRNA
ENSG00000160868.14	ENSG00000105516.10	0.0780522	undirected	CYP3A4	DBP	humanTF
ENSG00000160868.14	ENSG00000260196.1	0.0772067	undirected	CYP3A4	RP1-239B22.5	lncRNA
ENSG00000160868.14	ENSG00000262995.1	0.0768025	undirected	CYP3A4	CTD-2194A8.2	lncRNA
ENSG00000160868.14	ENSG00000114853.13	0.0760016	undirected	CYP3A4	ZBTB47	humanTF
ENSG00000160868.14	ENSG00000173041.11	0.0757743	undirected	CYP3A4	ZNF680	humanTF
ENSG00000160868.14	ENSG00000275025.1	0.0739916	undirected	CYP3A4	RP5-875H18.10	lncRNA
ENSG00000160868.14	ENSG00000272234.1	0.0732069	undirected	CYP3A4	CTD-2325A15.5	lncRNA
ENSG00000160868.14	ENSG00000188313.12	0.0717549	undirected	CYP3A4	PLSCR1	humanTF
ENSG00000160868.14	ENSG00000272732.1	0.0705937	undirected	CYP3A4	RP5-1159O4.2	lncRNA
ENSG00000160868.14	ENSG00000273151.1	0.0701116	undirected	CYP3A4	RP11-449P15.2	lncRNA
ENSG00000160868.14	ENSG00000275897.1	0.070027	undirected	CYP3A4	RP11-94C24.13	lncRNA
ENSG00000160868.14	ENSG00000138380.17	0.0698515	undirected	CYP3A4	CARF	humanTF
ENSG00000160868.14	ENSG00000230435.1	0.0686888	undirected	CYP3A4	AC004160.4	lncRNA
ENSG00000160868.14	ENSG00000143365.17	0.0683077	undirected	CYP3A4	RORC	humanTF
ENSG00000160868.14	ENSG00000116990.10	0.068098	undirected	CYP3A4	MYCL	humanTF
ENSG00000160868.14	ENSG00000275944.1	0.067789	undirected	CYP3A4	RP11-104J23.1	lncRNA
ENSG00000160868.14	ENSG00000226699.1	0.0676895	undirected	CYP3A4	RP11-122K13.7	lncRNA
ENSG00000160868.14	ENSG00000172493.20	0.0674768	undirected	CYP3A4	AFF1	humanTF
ENSG00000160868.14	ENSG00000279218.1	0.0673701	undirected	CYP3A4	RP11-263G22.1	lncRNA
ENSG00000160868.14	ENSG00000250764.1	0.0673459	undirected	CYP3A4	CTD-2152M20.2	lncRNA
ENSG00000160868.14	ENSG00000272583.1	0.0659054	undirected	CYP3A4	RP11-344P13.6	lncRNA
ENSG00000160868.14	ENSG00000156127.6	0.065777	undirected	CYP3A4	BATF	humanTF
ENSG00000160868.14	ENSG00000272129.1	0.0656551	undirected	CYP3A4	RP11-250B2.6	lncRNA
ENSG00000160868.14	ENSG00000254607.2	0.0653518	undirected	CYP3A4	LOC101929427	lncRNA
ENSG00000160868.14	ENSG00000229525.1	0.0650164	undirected	CYP3A4	AC053503.4	lncRNA
ENSG00000160868.14	ENSG00000248884.1	0.0646039	undirected	CYP3A4	CTC-537E7.3	lncRNA
ENSG00000160868.14	ENSG00000142528.15	0.0641689	undirected	CYP3A4	ZNF473	humanTF
ENSG00000160868.14	ENSG00000197099.8	0.0638562	undirected	CYP3A4	RP11-573D15.8	lncRNA
ENSG00000160868.14	ENSG00000260500.1	0.0636195	undirected	CYP3A4	CTD-3193O13.1	lncRNA
ENSG00000160868.14	ENSG00000272909.1	0.0629916	undirected	CYP3A4	CTD-2555O16.4	lncRNA
ENSG00000160868.14	ENSG00000078403.16	0.0615772	undirected	CYP3A4	MLLT10	humanTF
ENSG00000160868.14	ENSG00000272689.1	0.0614856	undirected	CYP3A4	RP4-539M6.21	lncRNA
ENSG00000160868.14	ENSG00000243230.1	0.0610052	undirected	CYP3A4	RP11-286H14.8	lncRNA
ENSG00000160868.14	ENSG00000247903.1	0.0605405	undirected	CYP3A4	RP11-421F16.3	lncRNA
ENSG00000160868.14	ENSG00000136936.10	0.060076	undirected	CYP3A4	XPA	humanTF
ENSG00000160868.14	ENSG00000250696.5	0.0598423	undirected	CYP3A4	LOC105377267	lncRNA
ENSG00000160868.14	ENSG00000108509.20	0.0593111	undirected	CYP3A4	CAMTA2	humanTF
ENSG00000160868.14	ENSG00000066136.20	0.0591138	undirected	CYP3A4	NFYC	humanTF
ENSG00000160868.14	ENSG00000197013.9	0.0590436	undirected	CYP3A4	ZNF429	humanTF
ENSG00000160868.14	ENSG00000230415.1	0.0576805	undirected	CYP3A4	LINC01786	lncRNA
ENSG00000160868.14	ENSG00000273350.1	0.0571969	undirected	CYP3A4	RP4-539M6.20	lncRNA
ENSG00000160868.14	ENSG00000267390.1	0.057005	undirected	CYP3A4	RP11-635N19.1	lncRNA
ENSG00000160868.14	ENSG00000272430.1	0.0568665	undirected	CYP3A4	RP11-38L15.8	lncRNA
ENSG00000160868.14	ENSG00000235532.1	0.0564771	undirected	CYP3A4	LINC00402	lncRNA
ENSG00000160868.14	ENSG00000275088.1	0.056304	undirected	CYP3A4	RP11-442O1.3	lncRNA
ENSG00000160868.14	ENSG00000283667.1	0.0552445	undirected	CYP3A4	RP11-793J2.1	lncRNA
ENSG00000160868.14	ENSG00000119547.5	0.0545737	undirected	CYP3A4	ONECUT2	humanTF
ENSG00000160868.14	ENSG00000245017.2	0.0538761	undirected	CYP3A4	LINC02453	lncRNA
ENSG00000160868.14	ENSG00000151090.17	0.053802	undirected	CYP3A4	THRB	humanTF
ENSG00000160868.14	ENSG00000110925.6	0.0537546	undirected	CYP3A4	CSRNP2	humanTF
ENSG00000160868.14	ENSG00000104856.13	0.0537384	undirected	CYP3A4	RELB	humanTF
ENSG00000160868.14	ENSG00000235078.1	0.0535739	undirected	CYP3A4	AC142528.1	lncRNA
ENSG00000160868.14	ENSG00000109787.12	0.0534309	undirected	CYP3A4	KLF3	humanTF
ENSG00000160868.14	ENSG00000281162.2	0.0532789	undirected	CYP3A4	LINC01127	lncRNA
ENSG00000160868.14	ENSG00000262445.3	0.0528931	undirected	CYP3A4	CTD-2545H1.2	lncRNA
ENSG00000160868.14	ENSG00000266970.1	0.0528117	undirected	CYP3A4	LOC101928674	lncRNA
ENSG00000160868.14	ENSG00000139083.10	0.0516724	undirected	CYP3A4	ETV6	humanTF
ENSG00000160868.14	ENSG00000234509.1	0.0516625	undirected	CYP3A4	AP000253.1	lncRNA
ENSG00000160868.14	ENSG00000197180.2	0.0513354	undirected	CYP3A4	CH17-340M24.3	lncRNA
ENSG00000160868.14	ENSG00000278214.1	0.0503696	undirected	CYP3A4	LINC02139	lncRNA

## Sheet: b-Liver_turquoise_CYP3A5
Table S1-2: The TFs, lncRNAs, and miRNAs co-expressed with CYP3A5 in turquoise module in the first group.
From Node	To Node	Weight	direction	From Name	To Name	Type
ENSG00000106258.13	ENSG00000274225.1	0.145248	undirected	CYP3A5	KB-68A7.1	lncRNA
ENSG00000106258.13	ENSG00000125520.13	0.144621	undirected	CYP3A5	SLC2A4RG	humanTF
ENSG00000106258.13	ENSG00000197114.11	0.143444	undirected	CYP3A5	ZGPAT	humanTF
ENSG00000106258.13	ENSG00000144331.18	0.138268	undirected	CYP3A5	ZNF385B	humanTF
ENSG00000106258.13	ENSG00000184517.11	0.136191	undirected	CYP3A5	ZFP1	humanTF
ENSG00000106258.13	ENSG00000229005.2	0.126901	undirected	CYP3A5	HNF4A-AS1	lncRNA
ENSG00000106258.13	ENSG00000205143.2	0.126726	undirected	CYP3A5	ARID3C	humanTF
ENSG00000106258.13	ENSG00000197905.8	0.124914	undirected	CYP3A5	TEAD4	humanTF
ENSG00000106258.13	ENSG00000143257.11	0.122048	undirected	CYP3A5	NR1I3	humanTF
ENSG00000106258.13	ENSG00000162599.15	0.120633	undirected	CYP3A5	NFIA	humanTF
ENSG00000106258.13	ENSG00000167491.17	0.118647	undirected	CYP3A5	GATAD2A	humanTF
ENSG00000106258.13	ENSG00000257702.3	0.113792	undirected	CYP3A5	LBX2-AS1	lncRNA
ENSG00000106258.13	ENSG00000225756.1	0.113446	undirected	CYP3A5	DBH-AS1	lncRNA
ENSG00000106258.13	ENSG00000250436.1	0.111137	undirected	CYP3A5	LINC02499	lncRNA
ENSG00000106258.13	ENSG00000029153.14	0.109759	undirected	CYP3A5	ARNTL2	humanTF
ENSG00000106258.13	ENSG00000232667.10	0.105751	undirected	CYP3A5	AC004862.6	lncRNA
ENSG00000106258.13	ENSG00000276075.1	0.104845	undirected	CYP3A5	AC027682.6	lncRNA
ENSG00000106258.13	ENSG00000258604.1	0.104055	undirected	CYP3A5	AL161668.5	lncRNA
ENSG00000106258.13	ENSG00000107175.11	0.103133	undirected	CYP3A5	CREB3	humanTF
ENSG00000106258.13	ENSG00000261058.1	0.10292	undirected	CYP3A5	RP11-252E2.2	lncRNA
ENSG00000106258.13	ENSG00000228923.1	0.102419	undirected	CYP3A5	AP000355.2	lncRNA
ENSG00000106258.13	ENSG00000251637.6	0.102176	undirected	CYP3A5	RP11-119D9.1	lncRNA
ENSG00000106258.13	ENSG00000279428.1	0.101872	undirected	CYP3A5	RP11-258F1.2	lncRNA
ENSG00000106258.13	ENSG00000228170.1	0.101262	undirected	CYP3A5	RP1-40E16.11	lncRNA
ENSG00000106258.13	ENSG00000100644.16	0.100884	undirected	CYP3A5	HIF1A	humanTF
ENSG00000106258.13	ENSG00000118922.17	0.0958524	undirected	CYP3A5	KLF12	humanTF
ENSG00000106258.13	ENSG00000207926.1	0.0956578	undirected	CYP3A5	MIR135A1	miRNA
ENSG00000106258.13	ENSG00000278058.1	0.0941803	undirected	CYP3A5	RP11-70D24.2	lncRNA
ENSG00000106258.13	ENSG00000144852.17	0.0940714	undirected	CYP3A5	NR1I2	humanTF
ENSG00000106258.13	ENSG00000100105.17	0.0935361	undirected	CYP3A5	PATZ1	humanTF
ENSG00000106258.13	ENSG00000262881.1	0.0931264	undirected	CYP3A5	RP11-669E14.4	lncRNA
ENSG00000106258.13	ENSG00000196693.14	0.09079	undirected	CYP3A5	ZNF33B	humanTF
ENSG00000106258.13	ENSG00000261469.1	0.0906329	undirected	CYP3A5	RP11-96D1.6	lncRNA
ENSG00000106258.13	ENSG00000279108.1	0.0903079	undirected	CYP3A5	CTC-490E21.11	lncRNA
ENSG00000106258.13	ENSG00000032219.18	0.0874465	undirected	CYP3A5	ARID4A	humanTF
ENSG00000106258.13	ENSG00000169083.16	0.0852661	undirected	CYP3A5	AR	humanTF
ENSG00000106258.13	ENSG00000029993.14	0.0842905	undirected	CYP3A5	HMGB3	humanTF
ENSG00000106258.13	ENSG00000279372.1	0.0830114	undirected	CYP3A5	RP11-1182P23.5	lncRNA
ENSG00000106258.13	ENSG00000230333.6	0.0824533	undirected	CYP3A5	AC004538.3	lncRNA
ENSG00000106258.13	ENSG00000279619.1	0.0812774	undirected	CYP3A5	CTD-2527I21.5	lncRNA
ENSG00000106258.13	ENSG00000151623.14	0.0803692	undirected	CYP3A5	NR3C2	humanTF
ENSG00000106258.13	ENSG00000233376.1	0.079556	undirected	CYP3A5	RP5-881L22.6	lncRNA
ENSG00000106258.13	ENSG00000264569.1	0.0791682	undirected	CYP3A5	DCXR-DT	lncRNA
ENSG00000106258.13	ENSG00000091831.22	0.078867	undirected	CYP3A5	ESR1	humanTF
ENSG00000106258.13	ENSG00000272732.1	0.0767397	undirected	CYP3A5	RP5-1159O4.2	lncRNA
ENSG00000106258.13	ENSG00000189403.14	0.0756959	undirected	CYP3A5	HMGB1	humanTF
ENSG00000106258.13	ENSG00000005436.13	0.075525	undirected	CYP3A5	GCFC2	humanTF
ENSG00000106258.13	ENSG00000253196.1	0.0730122	undirected	CYP3A5	RP11-706C16.7	lncRNA
ENSG00000106258.13	ENSG00000143365.17	0.0719145	undirected	CYP3A5	RORC	humanTF
ENSG00000106258.13	ENSG00000243678.11	0.0715982	undirected	CYP3A5	NME2	humanTF
ENSG00000106258.13	ENSG00000175727.13	0.0705329	undirected	CYP3A5	MLXIP	humanTF
ENSG00000106258.13	ENSG00000223991.1	0.0702104	undirected	CYP3A5	AC104809.2	lncRNA
ENSG00000106258.13	ENSG00000279317.2	0.0699927	undirected	CYP3A5	AC006994.2	lncRNA
ENSG00000106258.13	ENSG00000108924.13	0.0695409	undirected	CYP3A5	HLF	humanTF
ENSG00000106258.13	ENSG00000060138.12	0.06885	undirected	CYP3A5	YBX3	humanTF
ENSG00000106258.13	ENSG00000105516.10	0.0688195	undirected	CYP3A5	DBP	humanTF
ENSG00000106258.13	ENSG00000138380.17	0.0685021	undirected	CYP3A5	CARF	humanTF
ENSG00000106258.13	ENSG00000173041.11	0.0680722	undirected	CYP3A5	ZNF680	humanTF
ENSG00000106258.13	ENSG00000279218.1	0.0677115	undirected	CYP3A5	RP11-263G22.1	lncRNA
ENSG00000106258.13	ENSG00000272909.1	0.0675725	undirected	CYP3A5	CTD-2555O16.4	lncRNA
ENSG00000106258.13	ENSG00000226699.1	0.0670992	undirected	CYP3A5	RP11-122K13.7	lncRNA
ENSG00000106258.13	ENSG00000188313.12	0.0669899	undirected	CYP3A5	PLSCR1	humanTF
ENSG00000106258.13	ENSG00000114853.13	0.066877	undirected	CYP3A5	ZBTB47	humanTF
ENSG00000106258.13	ENSG00000260196.1	0.0654857	undirected	CYP3A5	RP1-239B22.5	lncRNA
ENSG00000106258.13	ENSG00000116990.10	0.0650258	undirected	CYP3A5	MYCL	humanTF
ENSG00000106258.13	ENSG00000275944.1	0.0637886	undirected	CYP3A5	RP11-104J23.1	lncRNA
ENSG00000106258.13	ENSG00000230435.1	0.0637585	undirected	CYP3A5	AC004160.4	lncRNA
ENSG00000106258.13	ENSG00000262995.1	0.0630726	undirected	CYP3A5	CTD-2194A8.2	lncRNA
ENSG00000106258.13	ENSG00000243230.1	0.0630682	undirected	CYP3A5	RP11-286H14.8	lncRNA
ENSG00000106258.13	ENSG00000278965.1	0.0628884	undirected	CYP3A5	RP11-39H3.2	lncRNA
ENSG00000106258.13	ENSG00000060566.13	0.0620991	undirected	CYP3A5	CREB3L3	humanTF
ENSG00000106258.13	ENSG00000272234.1	0.0618813	undirected	CYP3A5	CTD-2325A15.5	lncRNA
ENSG00000106258.13	ENSG00000247903.1	0.0614886	undirected	CYP3A5	RP11-421F16.3	lncRNA
ENSG00000106258.13	ENSG00000273151.1	0.0613792	undirected	CYP3A5	RP11-449P15.2	lncRNA
ENSG00000106258.13	ENSG00000074219.13	0.0611816	undirected	CYP3A5	TEAD2	humanTF
ENSG00000106258.13	ENSG00000275025.1	0.0610787	undirected	CYP3A5	RP5-875H18.10	lncRNA
ENSG00000106258.13	ENSG00000260500.1	0.0604599	undirected	CYP3A5	CTD-3193O13.1	lncRNA
ENSG00000106258.13	ENSG00000066136.20	0.060456	undirected	CYP3A5	NFYC	humanTF
ENSG00000106258.13	ENSG00000142528.15	0.0604255	undirected	CYP3A5	ZNF473	humanTF
ENSG00000106258.13	ENSG00000197099.8	0.0602838	undirected	CYP3A5	RP11-573D15.8	lncRNA
ENSG00000106258.13	ENSG00000230415.1	0.0598656	undirected	CYP3A5	LINC01786	lncRNA
ENSG00000106258.13	ENSG00000078403.16	0.0597626	undirected	CYP3A5	MLLT10	humanTF
ENSG00000106258.13	ENSG00000156127.6	0.0584031	undirected	CYP3A5	BATF	humanTF
ENSG00000106258.13	ENSG00000281162.2	0.0576003	undirected	CYP3A5	LINC01127	lncRNA
ENSG00000106258.13	ENSG00000229525.1	0.0575456	undirected	CYP3A5	AC053503.4	lncRNA
ENSG00000106258.13	ENSG00000250696.5	0.0575253	undirected	CYP3A5	LOC105377267	lncRNA
ENSG00000106258.13	ENSG00000275897.1	0.0573921	undirected	CYP3A5	RP11-94C24.13	lncRNA
ENSG00000106258.13	ENSG00000272689.1	0.0563935	undirected	CYP3A5	RP4-539M6.21	lncRNA
ENSG00000106258.13	ENSG00000172493.20	0.0553104	undirected	CYP3A5	AFF1	humanTF
ENSG00000106258.13	ENSG00000283667.1	0.0548208	undirected	CYP3A5	RP11-793J2.1	lncRNA
ENSG00000106258.13	ENSG00000104856.13	0.0536311	undirected	CYP3A5	RELB	humanTF
ENSG00000106258.13	ENSG00000136936.10	0.0535985	undirected	CYP3A5	XPA	humanTF
ENSG00000106258.13	ENSG00000254607.2	0.0532125	undirected	CYP3A5	LOC101929427	lncRNA
ENSG00000106258.13	ENSG00000250764.1	0.0527793	undirected	CYP3A5	CTD-2152M20.2	lncRNA
ENSG00000106258.13	ENSG00000258301.3	0.0526065	undirected	CYP3A5	VASH1-AS1	lncRNA
ENSG00000106258.13	ENSG00000272583.1	0.0525581	undirected	CYP3A5	RP11-344P13.6	lncRNA

## Sheet: c-Liver_turquoise_CYP3A7
Table S1-3: The TFs, lncRNAs, and miRNAs co-expressed with CYP3A7 in turquoise module in the first group.
From Node	To Node	Weight	direction	From Name	To Name	Type
ENSG00000160870.12	ENSG00000197114.11	0.154651	undirected	CYP3A7	ZGPAT	humanTF
ENSG00000160870.12	ENSG00000205143.2	0.141431	undirected	CYP3A7	ARID3C	humanTF
ENSG00000160870.12	ENSG00000184517.11	0.139802	undirected	CYP3A7	ZFP1	humanTF
ENSG00000160870.12	ENSG00000125520.13	0.139604	undirected	CYP3A7	SLC2A4RG	humanTF
ENSG00000160870.12	ENSG00000144331.18	0.138418	undirected	CYP3A7	ZNF385B	humanTF
ENSG00000160870.12	ENSG00000274225.1	0.136637	undirected	CYP3A7	KB-68A7.1	lncRNA
ENSG00000160870.12	ENSG00000229005.2	0.13335	undirected	CYP3A7	HNF4A-AS1	lncRNA
ENSG00000160870.12	ENSG00000167491.17	0.131352	undirected	CYP3A7	GATAD2A	humanTF
ENSG00000160870.12	ENSG00000276075.1	0.121654	undirected	CYP3A7	AC027682.6	lncRNA
ENSG00000160870.12	ENSG00000162599.15	0.12032	undirected	CYP3A7	NFIA	humanTF
ENSG00000160870.12	ENSG00000197905.8	0.115677	undirected	CYP3A7	TEAD4	humanTF
ENSG00000160870.12	ENSG00000251637.6	0.114222	undirected	CYP3A7	RP11-119D9.1	lncRNA
ENSG00000160870.12	ENSG00000261058.1	0.108722	undirected	CYP3A7	RP11-252E2.2	lncRNA
ENSG00000160870.12	ENSG00000257702.3	0.108689	undirected	CYP3A7	LBX2-AS1	lncRNA
ENSG00000160870.12	ENSG00000029153.14	0.108371	undirected	CYP3A7	ARNTL2	humanTF
ENSG00000160870.12	ENSG00000143257.11	0.107785	undirected	CYP3A7	NR1I3	humanTF
ENSG00000160870.12	ENSG00000250436.1	0.107239	undirected	CYP3A7	LINC02499	lncRNA
ENSG00000160870.12	ENSG00000258604.1	0.103769	undirected	CYP3A7	AL161668.5	lncRNA
ENSG00000160870.12	ENSG00000232667.10	0.0995851	undirected	CYP3A7	AC004862.6	lncRNA
ENSG00000160870.12	ENSG00000118922.17	0.09595	undirected	CYP3A7	KLF12	humanTF
ENSG00000160870.12	ENSG00000262881.1	0.0958438	undirected	CYP3A7	RP11-669E14.4	lncRNA
ENSG00000160870.12	ENSG00000225756.1	0.0957897	undirected	CYP3A7	DBH-AS1	lncRNA
ENSG00000160870.12	ENSG00000100644.16	0.095204	undirected	CYP3A7	HIF1A	humanTF
ENSG00000160870.12	ENSG00000228170.1	0.0949207	undirected	CYP3A7	RP1-40E16.11	lncRNA
ENSG00000160870.12	ENSG00000279428.1	0.0919916	undirected	CYP3A7	RP11-258F1.2	lncRNA
ENSG00000160870.12	ENSG00000107175.11	0.0911461	undirected	CYP3A7	CREB3	humanTF
ENSG00000160870.12	ENSG00000100105.17	0.0909642	undirected	CYP3A7	PATZ1	humanTF
ENSG00000160870.12	ENSG00000278058.1	0.0894129	undirected	CYP3A7	RP11-70D24.2	lncRNA
ENSG00000160870.12	ENSG00000175727.13	0.0882712	undirected	CYP3A7	MLXIP	humanTF
ENSG00000160870.12	ENSG00000279108.1	0.0879581	undirected	CYP3A7	CTC-490E21.11	lncRNA
ENSG00000160870.12	ENSG00000151623.14	0.0877614	undirected	CYP3A7	NR3C2	humanTF
ENSG00000160870.12	ENSG00000228923.1	0.0875658	undirected	CYP3A7	AP000355.2	lncRNA
ENSG00000160870.12	ENSG00000032219.18	0.0874747	undirected	CYP3A7	ARID4A	humanTF
ENSG00000160870.12	ENSG00000091831.22	0.0859101	undirected	CYP3A7	ESR1	humanTF
ENSG00000160870.12	ENSG00000253196.1	0.0854333	undirected	CYP3A7	RP11-706C16.7	lncRNA
ENSG00000160870.12	ENSG00000261469.1	0.0851732	undirected	CYP3A7	RP11-96D1.6	lncRNA
ENSG00000160870.12	ENSG00000279372.1	0.0846905	undirected	CYP3A7	RP11-1182P23.5	lncRNA
ENSG00000160870.12	ENSG00000264569.1	0.0830148	undirected	CYP3A7	DCXR-DT	lncRNA
ENSG00000160870.12	ENSG00000196693.14	0.0829507	undirected	CYP3A7	ZNF33B	humanTF
ENSG00000160870.12	ENSG00000279619.1	0.0826956	undirected	CYP3A7	CTD-2527I21.5	lncRNA
ENSG00000160870.12	ENSG00000169083.16	0.0820754	undirected	CYP3A7	AR	humanTF
ENSG00000160870.12	ENSG00000230333.6	0.0818458	undirected	CYP3A7	AC004538.3	lncRNA
ENSG00000160870.12	ENSG00000233376.1	0.0815857	undirected	CYP3A7	RP5-881L22.6	lncRNA
ENSG00000160870.12	ENSG00000207926.1	0.081118	undirected	CYP3A7	MIR135A1	miRNA
ENSG00000160870.12	ENSG00000029993.14	0.080656	undirected	CYP3A7	HMGB3	humanTF
ENSG00000160870.12	ENSG00000144852.17	0.0795777	undirected	CYP3A7	NR1I2	humanTF
ENSG00000160870.12	ENSG00000243678.11	0.0764085	undirected	CYP3A7	NME2	humanTF
ENSG00000160870.12	ENSG00000105516.10	0.0759173	undirected	CYP3A7	DBP	humanTF
ENSG00000160870.12	ENSG00000114853.13	0.0738781	undirected	CYP3A7	ZBTB47	humanTF
ENSG00000160870.12	ENSG00000223991.1	0.0738629	undirected	CYP3A7	AC104809.2	lncRNA
ENSG00000160870.12	ENSG00000060566.13	0.07315	undirected	CYP3A7	CREB3L3	humanTF
ENSG00000160870.12	ENSG00000005436.13	0.071199	undirected	CYP3A7	GCFC2	humanTF
ENSG00000160870.12	ENSG00000188313.12	0.0711275	undirected	CYP3A7	PLSCR1	humanTF
ENSG00000160870.12	ENSG00000278965.1	0.0704538	undirected	CYP3A7	RP11-39H3.2	lncRNA
ENSG00000160870.12	ENSG00000272234.1	0.0704198	undirected	CYP3A7	CTD-2325A15.5	lncRNA
ENSG00000160870.12	ENSG00000142528.15	0.0704101	undirected	CYP3A7	ZNF473	humanTF
ENSG00000160870.12	ENSG00000189403.14	0.0697646	undirected	CYP3A7	HMGB1	humanTF
ENSG00000160870.12	ENSG00000279317.2	0.0696343	undirected	CYP3A7	AC006994.2	lncRNA
ENSG00000160870.12	ENSG00000060138.12	0.0681812	undirected	CYP3A7	YBX3	humanTF
ENSG00000160870.12	ENSG00000279218.1	0.0672252	undirected	CYP3A7	RP11-263G22.1	lncRNA
ENSG00000160870.12	ENSG00000250764.1	0.0671626	undirected	CYP3A7	CTD-2152M20.2	lncRNA
ENSG00000160870.12	ENSG00000173041.11	0.0670442	undirected	CYP3A7	ZNF680	humanTF
ENSG00000160870.12	ENSG00000260196.1	0.0665833	undirected	CYP3A7	RP1-239B22.5	lncRNA
ENSG00000160870.12	ENSG00000275025.1	0.0661874	undirected	CYP3A7	RP5-875H18.10	lncRNA
ENSG00000160870.12	ENSG00000229525.1	0.0650828	undirected	CYP3A7	AC053503.4	lncRNA
ENSG00000160870.12	ENSG00000074219.13	0.0650418	undirected	CYP3A7	TEAD2	humanTF
ENSG00000160870.12	ENSG00000273151.1	0.0648265	undirected	CYP3A7	RP11-449P15.2	lncRNA
ENSG00000160870.12	ENSG00000138380.17	0.0643397	undirected	CYP3A7	CARF	humanTF
ENSG00000160870.12	ENSG00000250696.5	0.0637021	undirected	CYP3A7	LOC105377267	lncRNA
ENSG00000160870.12	ENSG00000247903.1	0.0627138	undirected	CYP3A7	RP11-421F16.3	lncRNA
ENSG00000160870.12	ENSG00000272732.1	0.0625554	undirected	CYP3A7	RP5-1159O4.2	lncRNA
ENSG00000160870.12	ENSG00000066136.20	0.0622757	undirected	CYP3A7	NFYC	humanTF
ENSG00000160870.12	ENSG00000254607.2	0.0618953	undirected	CYP3A7	LOC101929427	lncRNA
ENSG00000160870.12	ENSG00000116990.10	0.0616777	undirected	CYP3A7	MYCL	humanTF
ENSG00000160870.12	ENSG00000143365.17	0.060915	undirected	CYP3A7	RORC	humanTF
ENSG00000160870.12	ENSG00000243230.1	0.0600422	undirected	CYP3A7	RP11-286H14.8	lncRNA
ENSG00000160870.12	ENSG00000275944.1	0.0596063	undirected	CYP3A7	RP11-104J23.1	lncRNA
ENSG00000160870.12	ENSG00000225313.5	0.0593927	undirected	CYP3A7	RP11-415J8.3	lncRNA
ENSG00000160870.12	ENSG00000197099.8	0.0589955	undirected	CYP3A7	RP11-573D15.8	lncRNA
ENSG00000160870.12	ENSG00000108924.13	0.0588842	undirected	CYP3A7	HLF	humanTF
ENSG00000160870.12	ENSG00000226699.1	0.0586763	undirected	CYP3A7	RP11-122K13.7	lncRNA
ENSG00000160870.12	ENSG00000262995.1	0.058634	undirected	CYP3A7	CTD-2194A8.2	lncRNA
ENSG00000160870.12	ENSG00000260500.1	0.0582167	undirected	CYP3A7	CTD-3193O13.1	lncRNA
ENSG00000160870.12	ENSG00000078403.16	0.0581274	undirected	CYP3A7	MLLT10	humanTF
ENSG00000160870.12	ENSG00000272689.1	0.057831	undirected	CYP3A7	RP4-539M6.21	lncRNA
ENSG00000160870.12	ENSG00000230415.1	0.0577715	undirected	CYP3A7	LINC01786	lncRNA
ENSG00000160870.12	ENSG00000230435.1	0.0570298	undirected	CYP3A7	AC004160.4	lncRNA
ENSG00000160870.12	ENSG00000267390.1	0.0567664	undirected	CYP3A7	RP11-635N19.1	lncRNA
ENSG00000160870.12	ENSG00000275897.1	0.056484	undirected	CYP3A7	RP11-94C24.13	lncRNA
ENSG00000160870.12	ENSG00000130940.14	0.055148	undirected	CYP3A7	CASZ1	humanTF
ENSG00000160870.12	ENSG00000172493.20	0.0549506	undirected	CYP3A7	AFF1	humanTF
ENSG00000160870.12	ENSG00000272583.1	0.054928	undirected	CYP3A7	RP11-344P13.6	lncRNA
ENSG00000160870.12	ENSG00000197180.2	0.0543227	undirected	CYP3A7	CH17-340M24.3	lncRNA
ENSG00000160870.12	ENSG00000248884.1	0.0526289	undirected	CYP3A7	CTC-537E7.3	lncRNA
ENSG00000160870.12	ENSG00000273350.1	0.0517768	undirected	CYP3A7	RP4-539M6.20	lncRNA
ENSG00000160870.12	ENSG00000281162.2	0.0516842	undirected	CYP3A7	LINC01127	lncRNA
ENSG00000160870.12	ENSG00000272909.1	0.0514877	undirected	CYP3A7	CTD-2555O16.4	lncRNA
ENSG00000160870.12	ENSG00000171161.12	0.0513072	undirected	CYP3A7	ZNF672	humanTF
ENSG00000160870.12	ENSG00000156127.6	0.0510197	undirected	CYP3A7	BATF	humanTF
ENSG00000160870.12	ENSG00000266970.1	0.0508634	undirected	CYP3A7	LOC101928674	lncRNA
ENSG00000160870.12	ENSG00000139083.10	0.0508397	undirected	CYP3A7	ETV6	humanTF
ENSG00000160870.12	ENSG00000136936.10	0.0504587	undirected	CYP3A7	XPA	humanTF

## Sheet: d-SI_turquoise_CYP3A4
Table S1-4: The TFs, lncRNAs, and miRNAs co-expressed with CYP3A4 in turquoise module in the second group.
From Node	To Node	Weight	direction	From Name	To Name	Type
ENSG00000160868.14	ENSG00000166268.10	0.342092	undirected	CYP3A4	MYRFL	humanTF
ENSG00000160868.14	ENSG00000135100.17	0.331305	undirected	CYP3A4	HNF1A	humanTF
ENSG00000160868.14	ENSG00000144852.17	0.320364	undirected	CYP3A4	NR1I2	humanTF
ENSG00000160868.14	ENSG00000164749.11	0.317578	undirected	CYP3A4	HNF4G	humanTF
ENSG00000160868.14	ENSG00000130700.6	0.316911	undirected	CYP3A4	GATA5	humanTF
ENSG00000160868.14	ENSG00000224721.1	0.313619	undirected	CYP3A4	LOC102724153	lncRNA
ENSG00000160868.14	ENSG00000279693.1	0.30899	undirected	CYP3A4	RP11-71L14.3	lncRNA
ENSG00000160868.14	ENSG00000173153.13	0.306726	undirected	CYP3A4	ESRRA	humanTF
ENSG00000160868.14	ENSG00000172818.9	0.304634	undirected	CYP3A4	OVOL1	humanTF
ENSG00000160868.14	ENSG00000188242.4	0.304408	undirected	CYP3A4	PP7080	lncRNA
ENSG00000160868.14	ENSG00000175329.12	0.296942	undirected	CYP3A4	ISX	humanTF
ENSG00000160868.14	ENSG00000116833.13	0.294991	undirected	CYP3A4	NR5A2	humanTF
ENSG00000160868.14	ENSG00000125850.10	0.29433	undirected	CYP3A4	OVOL2	humanTF
ENSG00000160868.14	ENSG00000229719.5	0.294091	undirected	CYP3A4	MIR194-2HG	lncRNA
ENSG00000160868.14	ENSG00000282221.1	0.291889	undirected	CYP3A4	RP11-27G14.4	lncRNA
ENSG00000160868.14	ENSG00000275410.4	0.28934	undirected	CYP3A4	HNF1B	humanTF
ENSG00000160868.14	ENSG00000160685.13	0.287819	undirected	CYP3A4	ZBTB7B	humanTF
ENSG00000160868.14	ENSG00000232354.8	0.284741	undirected	CYP3A4	VIPR1-AS1	lncRNA
ENSG00000160868.14	ENSG00000222001.2	0.282753	undirected	CYP3A4	LOC101928881	lncRNA
ENSG00000160868.14	ENSG00000012504.13	0.28144	undirected	CYP3A4	NR1H4	humanTF
ENSG00000160868.14	ENSG00000117595.10	0.276047	undirected	CYP3A4	IRF6	humanTF
ENSG00000160868.14	ENSG00000101076.16	0.275264	undirected	CYP3A4	HNF4A	humanTF
ENSG00000160868.14	ENSG00000261183.5	0.27429	undirected	CYP3A4	SPINT1-AS1	lncRNA
ENSG00000160868.14	ENSG00000275234.1	0.274162	undirected	CYP3A4	CTD-2396E7.11	lncRNA
ENSG00000160868.14	ENSG00000043039.6	0.271587	undirected	CYP3A4	BARX2	humanTF
ENSG00000160868.14	ENSG00000111424.10	0.271319	undirected	CYP3A4	VDR	humanTF
ENSG00000160868.14	ENSG00000167800.9	0.268756	undirected	CYP3A4	TBX10	humanTF
ENSG00000160868.14	ENSG00000263893.2	0.267614	undirected	CYP3A4	CTD-3010D24.3	lncRNA
ENSG00000160868.14	ENSG00000060566.13	0.266789	undirected	CYP3A4	CREB3L3	humanTF
ENSG00000160868.14	ENSG00000265763.3	0.264325	undirected	CYP3A4	ZNF488	humanTF
ENSG00000160868.14	ENSG00000272405.1	0.262366	undirected	CYP3A4	RP11-284F21.10	lncRNA
ENSG00000160868.14	ENSG00000235523.1	0.260684	undirected	CYP3A4	RP11-63P12.7	lncRNA
ENSG00000160868.14	ENSG00000279017.1	0.258521	undirected	CYP3A4	RP11-697K23.3	lncRNA
ENSG00000160868.14	ENSG00000269915.1	0.254988	undirected	CYP3A4	AP006621.9	lncRNA
ENSG00000160868.14	ENSG00000124920.13	0.251106	undirected	CYP3A4	MYRF	humanTF
ENSG00000160868.14	ENSG00000279756.1	0.250044	undirected	CYP3A4	CTD-2385L22.2	lncRNA
ENSG00000160868.14	ENSG00000132024.17	0.248297	undirected	CYP3A4	CC2D1A	humanTF
ENSG00000160868.14	ENSG00000253696.2	0.243879	undirected	CYP3A4	KBTBD11-OT1	lncRNA
ENSG00000160868.14	ENSG00000083307.10	0.237877	undirected	CYP3A4	GRHL2	humanTF
ENSG00000160868.14	ENSG00000108788.11	0.235858	undirected	CYP3A4	MLX	humanTF
ENSG00000160868.14	ENSG00000102554.13	0.235778	undirected	CYP3A4	KLF5	humanTF
ENSG00000160868.14	ENSG00000205890.3	0.234389	undirected	CYP3A4	LOC100128770	lncRNA
ENSG00000160868.14	ENSG00000251169.2	0.234013	undirected	CYP3A4	LINC01843	lncRNA
ENSG00000160868.14	ENSG00000165556.9	0.229165	undirected	CYP3A4	CDX2	humanTF
ENSG00000160868.14	ENSG00000272068.1	0.228672	undirected	CYP3A4	RP11-284F21.9	lncRNA
ENSG00000160868.14	ENSG00000141448.8	0.227531	undirected	CYP3A4	GATA6	humanTF
ENSG00000160868.14	ENSG00000119042.16	0.224856	undirected	CYP3A4	SATB2	humanTF
ENSG00000160868.14	ENSG00000229953.1	0.222887	undirected	CYP3A4	RP11-284F21.7	lncRNA
ENSG00000160868.14	ENSG00000103460.16	0.222549	undirected	CYP3A4	TOX3	humanTF
ENSG00000160868.14	ENSG00000261488.1	0.222221	undirected	CYP3A4	TBILA	lncRNA
ENSG00000160868.14	ENSG00000261116.1	0.221709	undirected	CYP3A4	RP3-523K23.2	lncRNA
ENSG00000160868.14	ENSG00000260704.1	0.221472	undirected	CYP3A4	LINC00543	lncRNA
ENSG00000160868.14	ENSG00000153814.11	0.218132	undirected	CYP3A4	JAZF1	humanTF
ENSG00000160868.14	ENSG00000172238.4	0.217576	undirected	CYP3A4	ATOH1	humanTF
ENSG00000160868.14	ENSG00000130675.14	0.216436	undirected	CYP3A4	MNX1	humanTF
ENSG00000160868.14	ENSG00000272079.2	0.214723	undirected	CYP3A4	LA16c-380H5.5	lncRNA
ENSG00000160868.14	ENSG00000259230.1	0.214052	undirected	CYP3A4	LINC02323	lncRNA
ENSG00000160868.14	ENSG00000254290.1	0.209482	undirected	CYP3A4	RP11-150O12.3	lncRNA
ENSG00000160868.14	ENSG00000124664.10	0.207258	undirected	CYP3A4	SPDEF	humanTF
ENSG00000160868.14	ENSG00000204588.5	0.206823	undirected	CYP3A4	LINC01123	lncRNA
ENSG00000160868.14	ENSG00000260996.1	0.204171	undirected	CYP3A4	RP13-122B23.8	lncRNA
ENSG00000160868.14	ENSG00000224093.5	0.203962	undirected	CYP3A4	RP5-1033H22.2	lncRNA
ENSG00000160868.14	ENSG00000129514.5	0.202812	undirected	CYP3A4	FOXA1	humanTF
ENSG00000160868.14	ENSG00000113722.16	0.200758	undirected	CYP3A4	CDX1	humanTF
ENSG00000160868.14	ENSG00000261286.1	0.200139	undirected	CYP3A4	ATP2C2-AS1	lncRNA
ENSG00000160868.14	ENSG00000260593.1	0.199987	undirected	CYP3A4	RP11-432I5.2	lncRNA
ENSG00000160868.14	ENSG00000254988.1	0.199282	undirected	CYP3A4	CTD-2547H18.1	lncRNA
ENSG00000160868.14	ENSG00000274993.1	0.197952	undirected	CYP3A4	LOC105375431	lncRNA
ENSG00000160868.14	ENSG00000278912.1	0.19704	undirected	CYP3A4	CTD-2196E14.8	lncRNA
ENSG00000160868.14	ENSG00000278385.1	0.194603	undirected	CYP3A4	RP11-89H19.2	lncRNA
ENSG00000160868.14	ENSG00000258474.1	0.191518	undirected	CYP3A4	LINC02313	lncRNA
ENSG00000160868.14	ENSG00000270403.1	0.191203	undirected	CYP3A4	RP11-35P15.1	lncRNA
ENSG00000160868.14	ENSG00000235029.1	0.189084	undirected	CYP3A4	MNX1-AS2	lncRNA
ENSG00000160868.14	ENSG00000229005.2	0.187898	undirected	CYP3A4	HNF4A-AS1	lncRNA
ENSG00000160868.14	ENSG00000257084.1	0.18678	undirected	CYP3A4	MIR200CHG	lncRNA
ENSG00000160868.14	ENSG00000237476.1	0.186659	undirected	CYP3A4	LINC01637	lncRNA
ENSG00000160868.14	ENSG00000170608.2	0.186102	undirected	CYP3A4	FOXA3	humanTF
ENSG00000160868.14	ENSG00000260418.1	0.185646	undirected	CYP3A4	RP3-406A7.7	lncRNA
ENSG00000160868.14	ENSG00000273971.1	0.181689	undirected	CYP3A4	RP11-77K12.10	lncRNA
ENSG00000160868.14	ENSG00000163435.15	0.179975	undirected	CYP3A4	ELF3	humanTF
ENSG00000160868.14	ENSG00000227070.1	0.179626	undirected	CYP3A4	RP11-191G24.1	lncRNA
ENSG00000160868.14	ENSG00000231748.1	0.179275	undirected	CYP3A4	RP11-227H15.5	lncRNA
ENSG00000160868.14	ENSG00000174282.11	0.179209	undirected	CYP3A4	ZBTB4	humanTF
ENSG00000160868.14	ENSG00000189120.4	0.178802	undirected	CYP3A4	SP6	humanTF
ENSG00000160868.14	ENSG00000205189.11	0.175307	undirected	CYP3A4	ZBTB10	humanTF
ENSG00000160868.14	ENSG00000157613.10	0.172994	undirected	CYP3A4	CREB3L1	humanTF
ENSG00000160868.14	ENSG00000272763.1	0.172433	undirected	CYP3A4	RP11-357H14.17	lncRNA
ENSG00000160868.14	ENSG00000255474.1	0.17181	undirected	CYP3A4	GAU1	lncRNA
ENSG00000160868.14	ENSG00000172819.16	0.171016	undirected	CYP3A4	RARG	humanTF
ENSG00000160868.14	ENSG00000261437.1	0.170872	undirected	CYP3A4	LOC100288748	lncRNA
ENSG00000160868.14	ENSG00000225335.3	0.169881	undirected	CYP3A4	XXbac-B476C20.9	lncRNA
ENSG00000160868.14	ENSG00000104447.12	0.169339	undirected	CYP3A4	TRPS1	humanTF
ENSG00000160868.14	ENSG00000261713.6	0.165779	undirected	CYP3A4	SSTR5-AS1	lncRNA
ENSG00000160868.14	ENSG00000271916.1	0.164701	undirected	CYP3A4	RP11-884K10.6	lncRNA
ENSG00000160868.14	ENSG00000163497.2	0.164641	undirected	CYP3A4	FEV	humanTF
ENSG00000160868.14	ENSG00000160973.7	0.163876	undirected	CYP3A4	FOXH1	humanTF
ENSG00000160868.14	ENSG00000074657.13	0.163726	undirected	CYP3A4	ZNF532	humanTF
ENSG00000160868.14	ENSG00000059728.10	0.16344	undirected	CYP3A4	MXD1	humanTF
ENSG00000160868.14	ENSG00000276633.1	0.163337	undirected	CYP3A4	AJ011931.1	lncRNA
ENSG00000160868.14	ENSG00000267709.1	0.163281	undirected	CYP3A4	LOC101928844	lncRNA
ENSG00000160868.14	ENSG00000111145.7	0.162365	undirected	CYP3A4	ELK3	humanTF
ENSG00000160868.14	ENSG00000232093.1	0.161682	undirected	CYP3A4	DCST1-AS1	lncRNA
ENSG00000160868.14	ENSG00000204531.17	0.161172	undirected	CYP3A4	POU5F1	humanTF
ENSG00000160868.14	ENSG00000278041.1	0.159909	undirected	CYP3A4	RP5-984P4.6	lncRNA
ENSG00000160868.14	ENSG00000250893.1	0.15827	undirected	CYP3A4	RP11-588L15.2	lncRNA
ENSG00000160868.14	ENSG00000216560.4	0.155934	undirected	CYP3A4	LINC00955	lncRNA
ENSG00000160868.14	ENSG00000152217.16	0.155245	undirected	CYP3A4	SETBP1	humanTF
ENSG00000160868.14	ENSG00000169740.13	0.153902	undirected	CYP3A4	ZNF32	humanTF
ENSG00000160868.14	ENSG00000264575.1	0.152944	undirected	CYP3A4	LINC00526	lncRNA
ENSG00000160868.14	ENSG00000257702.3	0.152797	undirected	CYP3A4	LBX2-AS1	lncRNA
ENSG00000160868.14	ENSG00000237070.1	0.151605	undirected	CYP3A4	LOC105375166	lncRNA
ENSG00000160868.14	ENSG00000135373.12	0.150783	undirected	CYP3A4	EHF	humanTF
ENSG00000160868.14	ENSG00000249453.1	0.150286	undirected	CYP3A4	RP13-497K6.1	lncRNA
ENSG00000160868.14	ENSG00000185650.9	0.149876	undirected	CYP3A4	ZFP36L1	humanTF
ENSG00000160868.14	ENSG00000162992.3	0.148916	undirected	CYP3A4	NEUROD1	humanTF
ENSG00000160868.14	ENSG00000245848.2	0.14868	undirected	CYP3A4	CEBPA	humanTF
ENSG00000160868.14	ENSG00000268628.2	0.14861	undirected	CYP3A4	RP1-122P22.4	lncRNA
ENSG00000160868.14	ENSG00000261320.1	0.14695	undirected	CYP3A4	RP11-297D21.2	lncRNA
ENSG00000160868.14	ENSG00000069812.11	0.146706	undirected	CYP3A4	HES2	humanTF
ENSG00000160868.14	ENSG00000271795.1	0.145924	undirected	CYP3A4	CTC-251D13.1	lncRNA
ENSG00000160868.14	ENSG00000116793.15	0.144938	undirected	CYP3A4	PHTF1	humanTF
ENSG00000160868.14	ENSG00000250137.1	0.144488	undirected	CYP3A4	RP11-380P13.1	lncRNA
ENSG00000160868.14	ENSG00000261120.1	0.144388	undirected	CYP3A4	RP11-62H20.1	lncRNA
ENSG00000160868.14	ENSG00000009950.15	0.143667	undirected	CYP3A4	MLXIPL	humanTF
ENSG00000160868.14	ENSG00000272234.1	0.142898	undirected	CYP3A4	CTD-2325A15.5	lncRNA
ENSG00000160868.14	ENSG00000228170.1	0.142458	undirected	CYP3A4	RP1-40E16.11	lncRNA
ENSG00000160868.14	ENSG00000251637.6	0.142082	undirected	CYP3A4	RP11-119D9.1	lncRNA
ENSG00000160868.14	ENSG00000249201.2	0.141086	undirected	CYP3A4	CTD-3080P12.3	lncRNA
ENSG00000160868.14	ENSG00000258053.1	0.140049	undirected	CYP3A4	CTD-2021H9.3	lncRNA
ENSG00000160868.14	ENSG00000131910.4	0.139888	undirected	CYP3A4	NR0B2	humanTF
ENSG00000160868.14	ENSG00000272141.1	0.139573	undirected	CYP3A4	RP11-465B22.8	lncRNA
ENSG00000160868.14	ENSG00000228643.1	0.138691	undirected	CYP3A4	AC079779.4	lncRNA
ENSG00000160868.14	ENSG00000128645.14	0.138582	undirected	CYP3A4	HOXD1	humanTF
ENSG00000160868.14	ENSG00000166526.16	0.138494	undirected	CYP3A4	ZNF3	humanTF
ENSG00000160868.14	ENSG00000131788.15	0.138307	undirected	CYP3A4	PIAS3	humanTF
ENSG00000160868.14	ENSG00000126003.6	0.136866	undirected	CYP3A4	PLAGL2	humanTF
ENSG00000160868.14	ENSG00000267711.1	0.136602	undirected	CYP3A4	RP11-686D22.5	lncRNA
ENSG00000160868.14	ENSG00000152784.15	0.136523	undirected	CYP3A4	PRDM8	humanTF
ENSG00000160868.14	ENSG00000279805.1	0.136458	undirected	CYP3A4	CTA-212A2.1	lncRNA
ENSG00000160868.14	ENSG00000272720.1	0.136271	undirected	CYP3A4	CTA-228A9.3	lncRNA
ENSG00000160868.14	ENSG00000185002.9	0.136194	undirected	CYP3A4	RFX6	humanTF
ENSG00000160868.14	ENSG00000114439.18	0.135592	undirected	CYP3A4	BBX	humanTF
ENSG00000160868.14	ENSG00000207652.1	0.135466	undirected	CYP3A4	MIR621	miRNA
ENSG00000160868.14	ENSG00000257660.5	0.13545	undirected	CYP3A4	ADCY6-DT	lncRNA
ENSG00000160868.14	ENSG00000267150.1	0.135134	undirected	CYP3A4	RP11-411B10.2	lncRNA
ENSG00000160868.14	ENSG00000273162.1	0.135048	undirected	CYP3A4	RP11-108L7.15	lncRNA
ENSG00000160868.14	ENSG00000233360.4	0.134964	undirected	CYP3A4	PDXP-DT	lncRNA
ENSG00000160868.14	ENSG00000267139.1	0.134472	undirected	CYP3A4	AC005262.3	lncRNA
ENSG00000160868.14	ENSG00000279141.3	0.133843	undirected	CYP3A4	LINC01451	lncRNA
ENSG00000160868.14	ENSG00000135111.15	0.13381	undirected	CYP3A4	TBX3	humanTF
ENSG00000160868.14	ENSG00000238045.9	0.133787	undirected	CYP3A4	AC009133.12	lncRNA
ENSG00000160868.14	ENSG00000116132.11	0.133778	undirected	CYP3A4	PRRX1	humanTF
ENSG00000160868.14	ENSG00000260487.1	0.133444	undirected	CYP3A4	RP11-297C4.3	lncRNA
ENSG00000160868.14	ENSG00000258792.4	0.133069	undirected	CYP3A4	LOC105370616	lncRNA
ENSG00000160868.14	ENSG00000204528.3	0.132911	undirected	CYP3A4	PSORS1C3	lncRNA
ENSG00000160868.14	ENSG00000258534.1	0.132675	undirected	CYP3A4	CTD-2134A5.4	lncRNA
ENSG00000160868.14	ENSG00000260552.1	0.132664	undirected	CYP3A4	COSMOC	lncRNA
ENSG00000160868.14	ENSG00000226699.1	0.132453	undirected	CYP3A4	RP11-122K13.7	lncRNA
ENSG00000160868.14	ENSG00000261294.1	0.132408	undirected	CYP3A4	RP11-616M22.3	lncRNA
ENSG00000160868.14	ENSG00000258837.1	0.132123	undirected	CYP3A4	CTD-2566J3.1	lncRNA
ENSG00000160868.14	ENSG00000236377.1	0.131959	undirected	CYP3A4	AC084809.3	lncRNA
ENSG00000160868.14	ENSG00000175745.11	0.131672	undirected	CYP3A4	NR2F1	humanTF
ENSG00000160868.14	ENSG00000249685.1	0.131134	undirected	CYP3A4	RP11-360F5.3	lncRNA
ENSG00000160868.14	ENSG00000234155.1	0.130854	undirected	CYP3A4	LINC02535	lncRNA
ENSG00000160868.14	ENSG00000260592.1	0.130522	undirected	CYP3A4	CTA-363E6.6	lncRNA
ENSG00000160868.14	ENSG00000272189.1	0.129711	undirected	CYP3A4	RP3-325F22.5	lncRNA
ENSG00000160868.14	ENSG00000226812.2	0.129679	undirected	CYP3A4	RP5-881L22.5	lncRNA
ENSG00000160868.14	ENSG00000274964.1	0.129528	undirected	CYP3A4	RP11-817I4.1	lncRNA
ENSG00000160868.14	ENSG00000270988.1	0.129053	undirected	CYP3A4	RP11-439C15.5	lncRNA
ENSG00000160868.14	ENSG00000147488.11	0.128595	undirected	CYP3A4	ST18	humanTF
ENSG00000160868.14	ENSG00000227188.1	0.128262	undirected	CYP3A4	MGAT3-AS1	lncRNA
ENSG00000160868.14	ENSG00000130584.10	0.127888	undirected	CYP3A4	ZBTB46	humanTF
ENSG00000160868.14	ENSG00000169554.18	0.127466	undirected	CYP3A4	ZEB2	humanTF
ENSG00000160868.14	ENSG00000147180.16	0.127011	undirected	CYP3A4	ZNF711	humanTF
ENSG00000160868.14	ENSG00000203645.2	0.126866	undirected	CYP3A4	LINC00501	lncRNA
ENSG00000160868.14	ENSG00000167635.11	0.126404	undirected	CYP3A4	ZNF146	humanTF
ENSG00000160868.14	ENSG00000125618.16	0.126312	undirected	CYP3A4	PAX8	humanTF
ENSG00000160868.14	ENSG00000258376.2	0.125582	undirected	CYP3A4	RP4-647C14.2	lncRNA
ENSG00000160868.14	ENSG00000187607.15	0.125524	undirected	CYP3A4	ZNF286A	humanTF
ENSG00000160868.14	ENSG00000224276.1	0.124535	undirected	CYP3A4	ARHGEF2-AS1	lncRNA
ENSG00000160868.14	ENSG00000231889.7	0.124263	undirected	CYP3A4	TRAF3IP2-AS1	lncRNA
ENSG00000160868.14	ENSG00000262294.1	0.124185	undirected	CYP3A4	RP11-1260E13.2	lncRNA
ENSG00000160868.14	ENSG00000228172.5	0.124124	undirected	CYP3A4	RP1-317E23.3	lncRNA
ENSG00000160868.14	ENSG00000179528.15	0.124078	undirected	CYP3A4	LBX2	humanTF
ENSG00000160868.14	ENSG00000265971.1	0.124015	undirected	CYP3A4	RP11-269G24.6	lncRNA
ENSG00000160868.14	ENSG00000269973.1	0.123762	undirected	CYP3A4	RP11-95D17.1	lncRNA
ENSG00000160868.14	ENSG00000262558.1	0.123638	undirected	CYP3A4	RP11-1260E13.3	lncRNA
ENSG00000160868.14	ENSG00000204876.4	0.123295	undirected	CYP3A4	LOC389602	lncRNA
ENSG00000160868.14	ENSG00000207926.1	0.122264	undirected	CYP3A4	MIR135A1	miRNA
ENSG00000160868.14	ENSG00000275549.1	0.122143	undirected	CYP3A4	STPG3-AS1	lncRNA
ENSG00000160868.14	ENSG00000178573.6	0.121955	undirected	CYP3A4	MAF	humanTF
ENSG00000160868.14	ENSG00000235772.1	0.121693	undirected	CYP3A4	AP001625.6	lncRNA
ENSG00000160868.14	ENSG00000162714.12	0.121581	undirected	CYP3A4	ZNF496	humanTF
ENSG00000160868.14	ENSG00000204934.10	0.121579	undirected	CYP3A4	ATP6V0E2-AS1	lncRNA
ENSG00000160868.14	ENSG00000258122.1	0.121414	undirected	CYP3A4	RP11-61A14.1	lncRNA
ENSG00000160868.14	ENSG00000188171.15	0.121388	undirected	CYP3A4	ZNF626	humanTF
ENSG00000160868.14	ENSG00000261829.1	0.121221	undirected	CYP3A4	RP11-223I10.1	lncRNA
ENSG00000160868.14	ENSG00000261068.2	0.121032	undirected	CYP3A4	RP11-7K24.3	lncRNA
ENSG00000160868.14	ENSG00000258735.1	0.121018	undirected	CYP3A4	LINC00637	lncRNA
ENSG00000160868.14	ENSG00000271815.1	0.120903	undirected	CYP3A4	CTD-2235C13.3	lncRNA
ENSG00000160868.14	ENSG00000272293.1	0.120866	undirected	CYP3A4	RP11-91J19.3	lncRNA
ENSG00000160868.14	ENSG00000267934.1	0.120505	undirected	CYP3A4	CTB-176F20.3	lncRNA
ENSG00000160868.14	ENSG00000276533.1	0.120502	undirected	CYP3A4	RP11-139H15.5	lncRNA
ENSG00000160868.14	ENSG00000258256.1	0.120253	undirected	CYP3A4	RP11-219B4.5	lncRNA
ENSG00000160868.14	ENSG00000276434.1	0.12018	undirected	CYP3A4	RP11-391H12.8	lncRNA
ENSG00000160868.14	ENSG00000264012.1	0.120079	undirected	CYP3A4	RP11-627G18.2	lncRNA
ENSG00000160868.14	ENSG00000254859.1	0.11988	undirected	CYP3A4	RP11-661A12.5	lncRNA
ENSG00000160868.14	ENSG00000275025.1	0.119839	undirected	CYP3A4	RP5-875H18.10	lncRNA
ENSG00000160868.14	ENSG00000173039.18	0.118725	undirected	CYP3A4	RELA	humanTF
ENSG00000160868.14	ENSG00000007372.21	0.118622	undirected	CYP3A4	PAX6	humanTF
ENSG00000160868.14	ENSG00000270419.1	0.118398	undirected	CYP3A4	CAHM	lncRNA
ENSG00000160868.14	ENSG00000175322.11	0.118386	undirected	CYP3A4	ZNF519	humanTF
ENSG00000160868.14	ENSG00000178386.12	0.117426	undirected	CYP3A4	ZNF223	humanTF
ENSG00000160868.14	ENSG00000280832.1	0.11739	undirected	CYP3A4	ST3GAL4-AS1	lncRNA
ENSG00000160868.14	ENSG00000241886.1	0.117123	undirected	CYP3A4	RP11-242C19.2	lncRNA
ENSG00000160868.14	ENSG00000267986.1	0.116917	undirected	CYP3A4	AC130469.2	lncRNA
ENSG00000160868.14	ENSG00000196233.12	0.116886	undirected	CYP3A4	LCOR	humanTF
ENSG00000160868.14	ENSG00000269155.2	0.116631	undirected	CYP3A4	LOC441179	lncRNA
ENSG00000160868.14	ENSG00000225762.1	0.116381	undirected	CYP3A4	LINC01389	lncRNA
ENSG00000160868.14	ENSG00000115355.15	0.11593	undirected	CYP3A4	CCDC88A	humanTF
ENSG00000160868.14	ENSG00000187792.4	0.115918	undirected	CYP3A4	ZNF70	humanTF
ENSG00000160868.14	ENSG00000265933.5	0.115814	undirected	CYP3A4	LINC00668	lncRNA
ENSG00000160868.14	ENSG00000185252.18	0.115743	undirected	CYP3A4	ZNF74	humanTF
ENSG00000160868.14	ENSG00000241770.1	0.115737	undirected	CYP3A4	RP11-555M1.3	lncRNA
ENSG00000160868.14	ENSG00000273923.1	0.115648	undirected	CYP3A4	CTD-2536I1.3	lncRNA
ENSG00000160868.14	ENSG00000274029.1	0.115618	undirected	CYP3A4	RP11-340F14.6	lncRNA
ENSG00000160868.14	ENSG00000006047.12	0.115577	undirected	CYP3A4	YBX2	humanTF
ENSG00000160868.14	ENSG00000171295.12	0.115571	undirected	CYP3A4	ZNF440	humanTF
ENSG00000160868.14	ENSG00000219159.4	0.115242	undirected	CYP3A4	AC011298.2	lncRNA
ENSG00000160868.14	ENSG00000122691.12	0.115233	undirected	CYP3A4	TWIST1	humanTF
ENSG00000160868.14	ENSG00000196793.13	0.115228	undirected	CYP3A4	ZNF239	humanTF
ENSG00000160868.14	ENSG00000219665.8	0.115015	undirected	CYP3A4	ZNF433-AS1	lncRNA
ENSG00000160868.14	ENSG00000271983.1	0.114987	undirected	CYP3A4	RP11-28H5.2	lncRNA
ENSG00000160868.14	ENSG00000182873.5	0.11477	undirected	CYP3A4	PRKCZ-AS1	lncRNA
ENSG00000160868.14	ENSG00000115966.16	0.114717	undirected	CYP3A4	ATF2	humanTF
ENSG00000160868.14	ENSG00000270761.1	0.114431	undirected	CYP3A4	RP11-385F7.1	lncRNA
ENSG00000160868.14	ENSG00000258593.2	0.114343	undirected	CYP3A4	CTD-3051D23.4	lncRNA
ENSG00000160868.14	ENSG00000128710.5	0.113916	undirected	CYP3A4	HOXD10	humanTF
ENSG00000160868.14	ENSG00000228150.1	0.113732	undirected	CYP3A4	RP11-84A14.4	lncRNA
ENSG00000160868.14	ENSG00000231233.1	0.113681	undirected	CYP3A4	CFAP58-AS1	lncRNA
ENSG00000160868.14	ENSG00000266680.1	0.113638	undirected	CYP3A4	RP5-1148A21.3	lncRNA
ENSG00000160868.14	ENSG00000279427.1	0.11346	undirected	CYP3A4	RP11-132F7.2	lncRNA
ENSG00000160868.14	ENSG00000146676.8	0.11335	undirected	CYP3A4	PURB	humanTF
ENSG00000160868.14	ENSG00000253986.1	0.113211	undirected	CYP3A4	CTC-756D1.3	lncRNA
ENSG00000160868.14	ENSG00000257086.1	0.113206	undirected	CYP3A4	RP11-783K16.13	lncRNA
ENSG00000160868.14	ENSG00000224251.6	0.112947	undirected	CYP3A4	RP11-499O7.7	lncRNA
ENSG00000160868.14	ENSG00000196381.10	0.112744	undirected	CYP3A4	ZNF781	humanTF
ENSG00000160868.14	ENSG00000278058.1	0.112554	undirected	CYP3A4	RP11-70D24.2	lncRNA
ENSG00000160868.14	ENSG00000004848.7	0.112437	undirected	CYP3A4	ARX	humanTF
ENSG00000160868.14	ENSG00000267940.1	0.112375	undirected	CYP3A4	RP11-290F24.6	lncRNA
ENSG00000160868.14	ENSG00000249007.1	0.112239	undirected	CYP3A4	RP11-510N19.5	lncRNA
ENSG00000160868.14	ENSG00000187815.9	0.112173	undirected	CYP3A4	ZFP69	humanTF
ENSG00000160868.14	ENSG00000259954.1	0.112069	undirected	CYP3A4	IL21R-AS1	lncRNA
ENSG00000160868.14	ENSG00000235077.1	0.111946	undirected	CYP3A4	AC073842.19	lncRNA
ENSG00000160868.14	ENSG00000179388.8	0.111706	undirected	CYP3A4	EGR3	humanTF
ENSG00000160868.14	ENSG00000279227.1	0.1117	undirected	CYP3A4	AC009303.2	lncRNA
ENSG00000160868.14	ENSG00000151500.14	0.111153	undirected	CYP3A4	THYN1	humanTF
ENSG00000160868.14	ENSG00000274173.1	0.111092	undirected	CYP3A4	RP4-568C11.4	lncRNA
ENSG00000160868.14	ENSG00000250740.1	0.111029	undirected	CYP3A4	RP11-710F7.2	lncRNA
ENSG00000160868.14	ENSG00000198963.10	0.110686	undirected	CYP3A4	RORB	humanTF
ENSG00000160868.14	ENSG00000271576.1	0.110645	undirected	CYP3A4	RP11-486G15.2	lncRNA
ENSG00000160868.14	ENSG00000267414.1	0.110593	undirected	CYP3A4	SETBP1-DT	lncRNA
ENSG00000160868.14	ENSG00000180861.9	0.110577	undirected	CYP3A4	LINC01559	lncRNA
ENSG00000160868.14	ENSG00000273108.1	0.110045	undirected	CYP3A4	RP11-416N2.4	lncRNA
ENSG00000160868.14	ENSG00000231226.1	0.109845	undirected	CYP3A4	TRIM31-AS1	lncRNA
ENSG00000160868.14	ENSG00000124613.8	0.109749	undirected	CYP3A4	ZNF391	humanTF
ENSG00000160868.14	ENSG00000161298.17	0.109625	undirected	CYP3A4	ZNF382	humanTF
ENSG00000160868.14	ENSG00000173545.4	0.10953	undirected	CYP3A4	ZNF622	humanTF
ENSG00000160868.14	ENSG00000272267.2	0.109526	undirected	CYP3A4	RP11-375N15.2	lncRNA
ENSG00000160868.14	ENSG00000272989.1	0.109191	undirected	CYP3A4	LINC02012	lncRNA
ENSG00000160868.14	ENSG00000198453.12	0.109018	undirected	CYP3A4	ZNF568	humanTF
ENSG00000160868.14	ENSG00000124782.19	0.108918	undirected	CYP3A4	RREB1	humanTF
ENSG00000160868.14	ENSG00000226330.1	0.108789	undirected	CYP3A4	RP11-739N20.2	lncRNA
ENSG00000160868.14	ENSG00000248663.6	0.108763	undirected	CYP3A4	LINC00992	lncRNA
ENSG00000160868.14	ENSG00000226380.9	0.108691	undirected	CYP3A4	AC058791.1	lncRNA
ENSG00000160868.14	ENSG00000279583.1	0.108633	undirected	CYP3A4	RP11-368N21.5	lncRNA
ENSG00000160868.14	ENSG00000225075.1	0.108379	undirected	CYP3A4	RP11-426L16.3	lncRNA
ENSG00000160868.14	ENSG00000139154.14	0.108235	undirected	CYP3A4	AEBP2	humanTF
ENSG00000160868.14	ENSG00000243055.1	0.108234	undirected	CYP3A4	GK-AS1	lncRNA
ENSG00000160868.14	ENSG00000152926.14	0.108099	undirected	CYP3A4	ZNF117	humanTF
ENSG00000160868.14	ENSG00000272092.1	0.107759	undirected	CYP3A4	RP11-350N15.5	lncRNA
ENSG00000160868.14	ENSG00000164920.9	0.107535	undirected	CYP3A4	OSR2	humanTF
ENSG00000160868.14	ENSG00000091831.22	0.107465	undirected	CYP3A4	ESR1	humanTF
ENSG00000160868.14	ENSG00000263823.1	0.107357	undirected	CYP3A4	RP11-326K13.4	lncRNA
ENSG00000160868.14	ENSG00000116990.10	0.10712	undirected	CYP3A4	MYCL	humanTF
ENSG00000160868.14	ENSG00000259351.1	0.107107	undirected	CYP3A4	LOC101928988	lncRNA
ENSG00000160868.14	ENSG00000115112.7	0.107018	undirected	CYP3A4	TFCP2L1	humanTF
ENSG00000160868.14	ENSG00000197251.3	0.107004	undirected	CYP3A4	LINC00336	lncRNA
ENSG00000160868.14	ENSG00000236194.3	0.106976	undirected	CYP3A4	AC003104.1	lncRNA
ENSG00000160868.14	ENSG00000237989.1	0.106829	undirected	CYP3A4	LINC01679	lncRNA
ENSG00000160868.14	ENSG00000137166.14	0.106604	undirected	CYP3A4	FOXP4	humanTF
ENSG00000160868.14	ENSG00000267197.1	0.106593	undirected	CYP3A4	CTC-429L19.3	lncRNA
ENSG00000160868.14	ENSG00000257883.1	0.106538	undirected	CYP3A4	RP11-497G19.1	lncRNA
ENSG00000160868.14	ENSG00000261189.1	0.106443	undirected	CYP3A4	RP3-512B11.3	lncRNA
ENSG00000160868.14	ENSG00000248936.1	0.106014	undirected	CYP3A4	RP11-36B15.1	lncRNA
ENSG00000160868.14	ENSG00000197050.10	0.105873	undirected	CYP3A4	ZNF420	humanTF
ENSG00000160868.14	ENSG00000236609.3	0.105845	undirected	CYP3A4	ZNF853	humanTF
ENSG00000160868.14	ENSG00000270964.1	0.105835	undirected	CYP3A4	RP11-502I4.3	lncRNA
ENSG00000160868.14	ENSG00000165702.13	0.105828	undirected	CYP3A4	GFI1B	humanTF
ENSG00000160868.14	ENSG00000213793.5	0.105792	undirected	CYP3A4	ZNF888	humanTF
ENSG00000160868.14	ENSG00000077150.18	0.105754	undirected	CYP3A4	NFKB2	humanTF
ENSG00000160868.14	ENSG00000279348.1	0.105546	undirected	CYP3A4	RP11-566E18.1	lncRNA
ENSG00000160868.14	ENSG00000073282.12	0.105532	undirected	CYP3A4	TP63	humanTF
ENSG00000160868.14	ENSG00000231062.1	0.1054	undirected	CYP3A4	AC103563.9	lncRNA
ENSG00000160868.14	ENSG00000236137.1	0.105277	undirected	CYP3A4	LOC101929099	lncRNA
ENSG00000160868.14	ENSG00000235545.1	0.105166	undirected	CYP3A4	RP11-230B22.1	lncRNA
ENSG00000160868.14	ENSG00000159556.9	0.105154	undirected	CYP3A4	ISL2	humanTF
ENSG00000160868.14	ENSG00000215458.8	0.105109	undirected	CYP3A4	AATBC	lncRNA
ENSG00000160868.14	ENSG00000232710.1	0.105013	undirected	CYP3A4	RP4-669P10.16	lncRNA
ENSG00000160868.14	ENSG00000101190.12	0.104932	undirected	CYP3A4	TCFL5	humanTF
ENSG00000160868.14	ENSG00000137709.9	0.104896	undirected	CYP3A4	POU2F3	humanTF
ENSG00000160868.14	ENSG00000234928.1	0.104875	undirected	CYP3A4	LINC01659	lncRNA
ENSG00000160868.14	ENSG00000279302.3	0.104814	undirected	CYP3A4	RP11-16P20.4	lncRNA
ENSG00000160868.14	ENSG00000213963.6	0.104808	undirected	CYP3A4	LOC100130691	lncRNA
ENSG00000160868.14	ENSG00000242207.1	0.104799	undirected	CYP3A4	HOXB-AS4	lncRNA
ENSG00000160868.14	ENSG00000260196.1	0.104783	undirected	CYP3A4	RP1-239B22.5	lncRNA
ENSG00000160868.14	ENSG00000255050.1	0.104721	undirected	CYP3A4	RP11-661A12.9	lncRNA
ENSG00000160868.14	ENSG00000248309.7	0.104721	undirected	CYP3A4	MEF2C-AS1	lncRNA
ENSG00000160868.14	ENSG00000253395.1	0.10468	undirected	CYP3A4	KB-1460A1.1	lncRNA
ENSG00000160868.14	ENSG00000113580.14	0.10463	undirected	CYP3A4	NR3C1	humanTF
ENSG00000160868.14	ENSG00000181444.12	0.10453	undirected	CYP3A4	ZNF467	humanTF
ENSG00000160868.14	ENSG00000275437.1	0.104414	undirected	CYP3A4	RP5-908M14.10	lncRNA
ENSG00000160868.14	ENSG00000164330.16	0.104379	undirected	CYP3A4	EBF1	humanTF
ENSG00000160868.14	ENSG00000271806.1	0.103994	undirected	CYP3A4	RP5-892K4.1	lncRNA
ENSG00000160868.14	ENSG00000259444.1	0.103911	undirected	CYP3A4	RP11-736N17.8	lncRNA
ENSG00000160868.14	ENSG00000235192.1	0.103872	undirected	CYP3A4	AC009495.2	lncRNA
ENSG00000160868.14	ENSG00000278376.1	0.103848	undirected	CYP3A4	RP11-158I9.8	lncRNA
ENSG00000160868.14	ENSG00000268069.2	0.103765	undirected	CYP3A4	RP5-1057I20.4	lncRNA
ENSG00000160868.14	ENSG00000283635.1	0.103721	undirected	CYP3A4	RP11-5O24.1	lncRNA
ENSG00000160868.14	ENSG00000279035.1	0.10335	undirected	CYP3A4	RP11-649A18.3	lncRNA
ENSG00000160868.14	ENSG00000262362.1	0.10334	undirected	CYP3A4	LA16c-380H5.2	lncRNA
ENSG00000160868.14	ENSG00000262714.1	0.103271	undirected	CYP3A4	RP11-44F14.8	lncRNA
ENSG00000160868.14	ENSG00000261211.1	0.103056	undirected	CYP3A4	RP1-80N2.3	lncRNA
ENSG00000160868.14	ENSG00000246528.3	0.103047	undirected	CYP3A4	LOC101929759	lncRNA
ENSG00000160868.14	ENSG00000273403.1	0.103013	undirected	CYP3A4	RP11-329B9.3	lncRNA
ENSG00000160868.14	ENSG00000056277.15	0.102702	undirected	CYP3A4	ZNF280C	humanTF
ENSG00000160868.14	ENSG00000125482.12	0.102662	undirected	CYP3A4	TTF1	humanTF
ENSG00000160868.14	ENSG00000279368.1	0.102647	undirected	CYP3A4	RP1-80N2.4	lncRNA
ENSG00000160868.14	ENSG00000181007.8	0.102632	undirected	CYP3A4	ZFP82	humanTF
ENSG00000160868.14	ENSG00000278126.1	0.102609	undirected	CYP3A4	RP11-454E5.4	lncRNA
ENSG00000160868.14	ENSG00000279353.1	0.102494	undirected	CYP3A4	RP11-864N7.4	lncRNA
ENSG00000160868.14	ENSG00000122877.15	0.102374	undirected	CYP3A4	EGR2	humanTF
ENSG00000160868.14	ENSG00000279418.1	0.102214	undirected	CYP3A4	LINC00244	lncRNA
ENSG00000160868.14	ENSG00000249459.8	0.101779	undirected	CYP3A4	ZNF286B	humanTF
ENSG00000160868.14	ENSG00000261266.2	0.101523	undirected	CYP3A4	CTD-2196E14.5	lncRNA
ENSG00000160868.14	ENSG00000280587.1	0.101469	undirected	CYP3A4	LINC01348	lncRNA
ENSG00000160868.14	ENSG00000204304.11	0.101348	undirected	CYP3A4	PBX2	humanTF
ENSG00000160868.14	ENSG00000279528.1	0.10126	undirected	CYP3A4	RP11-1148L6.8	lncRNA
ENSG00000160868.14	ENSG00000262585.1	0.101213	undirected	CYP3A4	LINC01979	lncRNA
ENSG00000160868.14	ENSG00000224805.2	0.101201	undirected	CYP3A4	LINC00853	lncRNA
ENSG00000160868.14	ENSG00000260352.1	0.101162	undirected	CYP3A4	CTD-2288F12.1	lncRNA
ENSG00000160868.14	ENSG00000278991.1	0.101144	undirected	CYP3A4	RP11-797A18.5	lncRNA
ENSG00000160868.14	ENSG00000272170.1	0.101117	undirected	CYP3A4	RP11-387M24.5	lncRNA
ENSG00000160868.14	ENSG00000227963.1	0.101116	undirected	CYP3A4	RBM15-AS1	lncRNA
ENSG00000160868.14	ENSG00000234961.1	0.10108	undirected	CYP3A4	RP11-124N14.3	lncRNA
ENSG00000160868.14	ENSG00000266651.1	0.101004	undirected	CYP3A4	RP11-138I1.3	lncRNA
ENSG00000160868.14	ENSG00000253477.5	0.100905	undirected	CYP3A4	RP11-1C8.4	lncRNA
ENSG00000160868.14	ENSG00000280304.1	0.100809	undirected	CYP3A4	CTD-2536I1.2	lncRNA
ENSG00000160868.14	ENSG00000254064.1	0.1008	undirected	CYP3A4	LOC100507071	lncRNA
ENSG00000160868.14	ENSG00000284052.1	0.100779	undirected	CYP3A4	RP11-284E5.1	lncRNA
ENSG00000160868.14	ENSG00000279377.1	0.100569	undirected	CYP3A4	AC003973.3	lncRNA
ENSG00000160868.14	ENSG00000274554.1	0.10037	undirected	CYP3A4	RP11-240G22.5	lncRNA
ENSG00000160868.14	ENSG00000265656.1	0.100316	undirected	CYP3A4	RP11-13N13.6	lncRNA
ENSG00000160868.14	ENSG00000214797.3	0.100201	undirected	CYP3A4	RP11-1036E20.9	lncRNA
ENSG00000160868.14	ENSG00000196345.12	0.100123	undirected	CYP3A4	ZKSCAN7	humanTF
ENSG00000160868.14	ENSG00000196437.10	0.100048	undirected	CYP3A4	ZNF569	humanTF
ENSG00000160868.14	ENSG00000264301.1	0.100011	undirected	CYP3A4	LINC01444	lncRNA
ENSG00000160868.14	ENSG00000268516.2	0.0999723	undirected	CYP3A4	LOC105372482	lncRNA
ENSG00000160868.14	ENSG00000231050.1	0.0999694	undirected	CYP3A4	RP1-140A9.1	lncRNA
ENSG00000160868.14	ENSG00000255389.1	0.099925	undirected	CYP3A4	C6orf3	lncRNA
ENSG00000160868.14	ENSG00000272510.1	0.099876	undirected	CYP3A4	RP4-680D5.8	lncRNA
ENSG00000160868.14	ENSG00000249709.7	0.0998021	undirected	CYP3A4	ZNF564	humanTF
ENSG00000160868.14	ENSG00000233834.6	0.099704	undirected	CYP3A4	LOC100506098	lncRNA
ENSG00000160868.14	ENSG00000177732.8	0.0994937	undirected	CYP3A4	SOX12	humanTF
ENSG00000160868.14	ENSG00000261188.1	0.0994631	undirected	CYP3A4	CTA-445C9.14	lncRNA
ENSG00000160868.14	ENSG00000181894.14	0.0994548	undirected	CYP3A4	ZNF329	humanTF
ENSG00000160868.14	ENSG00000278916.1	0.0994089	undirected	CYP3A4	CEP83-DT	lncRNA
ENSG00000160868.14	ENSG00000169131.11	0.0993268	undirected	CYP3A4	ZNF354A	humanTF
ENSG00000160868.14	ENSG00000256897.1	0.0991931	undirected	CYP3A4	RP11-17G12.2	lncRNA
ENSG00000160868.14	ENSG00000232756.1	0.099044	undirected	CYP3A4	RP5-1185I7.1	lncRNA
ENSG00000160868.14	ENSG00000157657.14	0.098948	undirected	CYP3A4	ZNF618	humanTF
ENSG00000160868.14	ENSG00000280186.1	0.0987806	undirected	CYP3A4	RP11-483I13.6	lncRNA
ENSG00000160868.14	ENSG00000161642.17	0.0987449	undirected	CYP3A4	ZNF385A	humanTF
ENSG00000160868.14	ENSG00000278192.1	0.0984661	undirected	CYP3A4	RP5-1056H1.2	lncRNA
ENSG00000160868.14	ENSG00000005102.12	0.0984225	undirected	CYP3A4	MEOX1	humanTF
ENSG00000160868.14	ENSG00000254389.3	0.0983863	undirected	CYP3A4	RHPN1-AS1	lncRNA
ENSG00000160868.14	ENSG00000270571.2	0.0981816	undirected	CYP3A4	RP11-355F16.1	lncRNA
ENSG00000160868.14	ENSG00000268756.1	0.0981637	undirected	CYP3A4	AC104534.2	lncRNA
ENSG00000160868.14	ENSG00000238184.1	0.0981445	undirected	CYP3A4	CD81-AS1	lncRNA
ENSG00000160868.14	ENSG00000207650.1	0.0981289	undirected	CYP3A4	MIR570	miRNA
ENSG00000160868.14	ENSG00000226029.1	0.0980944	undirected	CYP3A4	LINC01772	lncRNA
ENSG00000160868.14	ENSG00000234160.1	0.098085	undirected	CYP3A4	RP11-613M10.6	lncRNA
ENSG00000160868.14	ENSG00000081386.12	0.0980368	undirected	CYP3A4	ZNF510	humanTF
ENSG00000160868.14	ENSG00000259354.5	0.0977799	undirected	CYP3A4	RP11-519G16.3	lncRNA
ENSG00000160868.14	ENSG00000254461.1	0.0976614	undirected	CYP3A4	RP11-755F10.3	lncRNA
ENSG00000160868.14	ENSG00000018869.16	0.097466	undirected	CYP3A4	ZNF582	humanTF
ENSG00000160868.14	ENSG00000229692.3	0.0973398	undirected	CYP3A4	SOS1-IT1	lncRNA
ENSG00000160868.14	ENSG00000270095.1	0.0972574	undirected	CYP3A4	RP11-214K3.18	lncRNA
ENSG00000160868.14	ENSG00000254872.3	0.0972106	undirected	CYP3A4	LINC02688	lncRNA
ENSG00000160868.14	ENSG00000025156.12	0.0971627	undirected	CYP3A4	HSF2	humanTF
ENSG00000160868.14	ENSG00000267288.2	0.0970582	undirected	CYP3A4	LOC105371795	lncRNA
ENSG00000160868.14	ENSG00000234699.1	0.0968898	undirected	CYP3A4	RP11-225H22.4	lncRNA
ENSG00000160868.14	ENSG00000225329.3	0.0968783	undirected	CYP3A4	LHFPL3-AS2	lncRNA
ENSG00000160868.14	ENSG00000261468.1	0.0968477	undirected	CYP3A4	RP11-1024P17.1	lncRNA
ENSG00000160868.14	ENSG00000229660.1	0.0965929	undirected	CYP3A4	RP5-1142J19.1	lncRNA
ENSG00000160868.14	ENSG00000159592.10	0.0965676	undirected	CYP3A4	GPBP1L1	humanTF
ENSG00000160868.14	ENSG00000227359.1	0.0965208	undirected	CYP3A4	AC017074.2	lncRNA
ENSG00000160868.14	ENSG00000126767.17	0.0963485	undirected	CYP3A4	ELK1	humanTF
ENSG00000160868.14	ENSG00000271833.1	0.0961753	undirected	CYP3A4	RP11-356B19.11	lncRNA
ENSG00000160868.14	ENSG00000276075.1	0.0960848	undirected	CYP3A4	AC027682.6	lncRNA
ENSG00000160868.14	ENSG00000122482.20	0.0957326	undirected	CYP3A4	ZNF644	humanTF
ENSG00000160868.14	ENSG00000267296.2	0.0956707	undirected	CYP3A4	CEBPA-DT	lncRNA
ENSG00000160868.14	ENSG00000255992.1	0.0955022	undirected	CYP3A4	RP11-417L19.4	lncRNA
ENSG00000160868.14	ENSG00000260265.1	0.0954985	undirected	CYP3A4	RP11-44F21.5	lncRNA
ENSG00000160868.14	ENSG00000150347.14	0.0953862	undirected	CYP3A4	ARID5B	humanTF
ENSG00000160868.14	ENSG00000260464.1	0.0953754	undirected	CYP3A4	RP4-561L24.3	lncRNA
ENSG00000160868.14	ENSG00000273172.1	0.0951925	undirected	CYP3A4	LINC02091	lncRNA
ENSG00000160868.14	ENSG00000265800.1	0.0950564	undirected	CYP3A4	RP11-649A18.5	lncRNA
ENSG00000160868.14	ENSG00000214717.11	0.0949547	undirected	CYP3A4	ZBED1	humanTF
ENSG00000160868.14	ENSG00000125798.14	0.0949226	undirected	CYP3A4	FOXA2	humanTF
ENSG00000160868.14	ENSG00000261504.1	0.0949161	undirected	CYP3A4	LINC01686	lncRNA
ENSG00000160868.14	ENSG00000236772.1	0.094874	undirected	CYP3A4	RP5-1184F4.5	lncRNA
ENSG00000160868.14	ENSG00000196460.12	0.0948332	undirected	CYP3A4	RFX8	humanTF
ENSG00000160868.14	ENSG00000127528.5	0.0947972	undirected	CYP3A4	KLF2	humanTF
ENSG00000160868.14	ENSG00000270182.1	0.0945891	undirected	CYP3A4	RP1-170O19.24	lncRNA
ENSG00000160868.14	ENSG00000084093.16	0.0945739	undirected	CYP3A4	REST	humanTF
ENSG00000160868.14	ENSG00000271969.1	0.094419	undirected	CYP3A4	U47924.29	lncRNA
ENSG00000160868.14	ENSG00000198342.9	0.0943746	undirected	CYP3A4	ZNF442	humanTF
ENSG00000160868.14	ENSG00000228126.1	0.0942559	undirected	CYP3A4	FALEC	lncRNA
ENSG00000160868.14	ENSG00000243479.3	0.0942306	undirected	CYP3A4	MNX1-AS1	lncRNA
ENSG00000160868.14	ENSG00000016082.14	0.0942261	undirected	CYP3A4	ISL1	humanTF
ENSG00000160868.14	ENSG00000263050.1	0.0941871	undirected	CYP3A4	RP11-667K14.3	lncRNA
ENSG00000160868.14	ENSG00000276691.1	0.0938947	undirected	CYP3A4	RP5-1057I20.5	lncRNA
ENSG00000160868.14	ENSG00000185869.14	0.0938563	undirected	CYP3A4	ZNF829	humanTF
ENSG00000160868.14	ENSG00000255328.1	0.0938483	undirected	CYP3A4	RP11-326C3.12	lncRNA
ENSG00000160868.14	ENSG00000230148.8	0.0938315	undirected	CYP3A4	HOXB-AS1	lncRNA
ENSG00000160868.14	ENSG00000185122.10	0.0937372	undirected	CYP3A4	HSF1	humanTF
ENSG00000160868.14	ENSG00000272374.1	0.0936263	undirected	CYP3A4	RP3-329A5.8	lncRNA
ENSG00000160868.14	ENSG00000173451.6	0.0934904	undirected	CYP3A4	THAP2	humanTF
ENSG00000160868.14	ENSG00000272656.1	0.0933619	undirected	CYP3A4	RP11-219D15.3	lncRNA
ENSG00000160868.14	ENSG00000274849.1	0.0932295	undirected	CYP3A4	RP11-49I11.4	lncRNA
ENSG00000160868.14	ENSG00000160321.14	0.093142	undirected	CYP3A4	ZNF208	humanTF
ENSG00000160868.14	ENSG00000223552.1	0.0930669	undirected	CYP3A4	RP11-24F11.2	lncRNA
ENSG00000160868.14	ENSG00000260121.1	0.0930275	undirected	CYP3A4	RP5-1142A6.9	lncRNA
ENSG00000160868.14	ENSG00000250790.4	0.0928649	undirected	CYP3A4	RP11-46H11.3	lncRNA
ENSG00000160868.14	ENSG00000227053.1	0.0926535	undirected	CYP3A4	MUC12-AS1	lncRNA
ENSG00000160868.14	ENSG00000232874.1	0.092474	undirected	CYP3A4	RP11-135A1.2	lncRNA
ENSG00000160868.14	ENSG00000106331.15	0.092334	undirected	CYP3A4	PAX4	humanTF
ENSG00000160868.14	ENSG00000221923.8	0.0923305	undirected	CYP3A4	ZNF880	humanTF
ENSG00000160868.14	ENSG00000278107.1	0.0920762	undirected	CYP3A4	RP11-162A12.4	lncRNA
ENSG00000160868.14	ENSG00000237009.2	0.0918842	undirected	CYP3A4	GLIS3-AS1	lncRNA
ENSG00000160868.14	ENSG00000198546.14	0.0918213	undirected	CYP3A4	ZNF511	humanTF
ENSG00000160868.14	ENSG00000250312.6	0.0918168	undirected	CYP3A4	ZNF718	humanTF
ENSG00000160868.14	ENSG00000188321.13	0.091768	undirected	CYP3A4	ZNF559	humanTF
ENSG00000160868.14	ENSG00000272008.1	0.0917472	undirected	CYP3A4	RP11-393I2.4	lncRNA
ENSG00000160868.14	ENSG00000242852.6	0.0917188	undirected	CYP3A4	ZNF709	humanTF
ENSG00000160868.14	ENSG00000180479.13	0.0915203	undirected	CYP3A4	ZNF571	humanTF
ENSG00000160868.14	ENSG00000255737.2	0.0914863	undirected	CYP3A4	AGAP2-AS1	lncRNA
ENSG00000160868.14	ENSG00000198358.4	0.0914602	undirected	CYP3A4	LOC101928372	lncRNA
ENSG00000160868.14	ENSG00000272447.1	0.0913939	undirected	CYP3A4	LOC642361	lncRNA
ENSG00000160868.14	ENSG00000254703.2	0.0913935	undirected	CYP3A4	SENCR	lncRNA
ENSG00000160868.14	ENSG00000186777.11	0.0912589	undirected	CYP3A4	ZNF732	humanTF
ENSG00000160868.14	ENSG00000197279.3	0.0910222	undirected	CYP3A4	ZNF165	humanTF
ENSG00000160868.14	ENSG00000162702.7	0.0909944	undirected	CYP3A4	ZNF281	humanTF
ENSG00000160868.14	ENSG00000237133.1	0.0909757	undirected	CYP3A4	AC020594.5	lncRNA
ENSG00000160868.14	ENSG00000168826.15	0.0909659	undirected	CYP3A4	ZBTB49	humanTF
ENSG00000160868.14	ENSG00000280245.1	0.0909467	undirected	CYP3A4	RP11-466A19.4	lncRNA
ENSG00000160868.14	ENSG00000278743.1	0.0908858	undirected	CYP3A4	RP11-707G18.1	lncRNA
ENSG00000160868.14	ENSG00000279212.1	0.0908702	undirected	CYP3A4	RP13-16H11.8	lncRNA
ENSG00000160868.14	ENSG00000167034.9	0.0908234	undirected	CYP3A4	NKX3-1	humanTF
ENSG00000160868.14	ENSG00000254614.2	0.0907417	undirected	CYP3A4	LOC728975	lncRNA
ENSG00000160868.14	ENSG00000260398.1	0.0906813	undirected	CYP3A4	RP11-594N15.3	lncRNA
ENSG00000160868.14	ENSG00000277829.1	0.0905396	undirected	CYP3A4	RP5-1054A22.4	lncRNA
ENSG00000160868.14	ENSG00000186017.14	0.0904202	undirected	CYP3A4	ZNF566	humanTF
ENSG00000160868.14	ENSG00000197062.11	0.0902068	undirected	CYP3A4	ZSCAN26	humanTF
ENSG00000160868.14	ENSG00000263786.1	0.0901557	undirected	CYP3A4	RP11-649A18.4	lncRNA
ENSG00000160868.14	ENSG00000236986.6	0.0900803	undirected	CYP3A4	RP11-544A12.4	lncRNA
ENSG00000160868.14	ENSG00000274737.1	0.0899978	undirected	CYP3A4	RP5-1057I20.6	lncRNA
ENSG00000160868.14	ENSG00000276417.1	0.0897368	undirected	CYP3A4	RP11-266K4.13	lncRNA
ENSG00000160868.14	ENSG00000272183.1	0.0897326	undirected	CYP3A4	RP11-523H20.3	lncRNA
ENSG00000160868.14	ENSG00000272009.1	0.0896235	undirected	CYP3A4	RP1-313I6.12	lncRNA
ENSG00000160868.14	ENSG00000280303.2	0.0895802	undirected	CYP3A4	ERICD	lncRNA
ENSG00000160868.14	ENSG00000005436.13	0.0895742	undirected	CYP3A4	GCFC2	humanTF
ENSG00000160868.14	ENSG00000169714.16	0.0895282	undirected	CYP3A4	CNBP	humanTF
ENSG00000160868.14	ENSG00000267583.5	0.0895265	undirected	CYP3A4	RP11-322E11.5	lncRNA
ENSG00000160868.14	ENSG00000245869.2	0.0894691	undirected	CYP3A4	RP11-158I9.5	lncRNA
ENSG00000160868.14	ENSG00000123685.8	0.0894523	undirected	CYP3A4	BATF3	humanTF
ENSG00000160868.14	ENSG00000268157.1	0.089441	undirected	CYP3A4	AC010524.4	lncRNA
ENSG00000160868.14	ENSG00000134107.4	0.0894231	undirected	CYP3A4	BHLHE40	humanTF
ENSG00000160868.14	ENSG00000245910.8	0.0893458	undirected	CYP3A4	SNHG6	lncRNA
ENSG00000160868.14	ENSG00000268006.1	0.0893374	undirected	CYP3A4	PTOV1-AS1	lncRNA
ENSG00000160868.14	ENSG00000247317.3	0.0891974	undirected	CYP3A4	RP11-273G15.2	lncRNA
ENSG00000160868.14	ENSG00000269376.1	0.0891639	undirected	CYP3A4	RP11-120K24.5	lncRNA
ENSG00000160868.14	ENSG00000186766.7	0.0891214	undirected	CYP3A4	FOXI2	humanTF
ENSG00000160868.14	ENSG00000010030.13	0.0890953	undirected	CYP3A4	ETV7	humanTF
ENSG00000160868.14	ENSG00000203684.5	0.0890234	undirected	CYP3A4	IBA57-DT	lncRNA
ENSG00000160868.14	ENSG00000141040.14	0.0889628	undirected	CYP3A4	ZNF287	humanTF
ENSG00000160868.14	ENSG00000237457.6	0.0887922	undirected	CYP3A4	LINC01351	lncRNA
ENSG00000160868.14	ENSG00000261959.1	0.088695	undirected	CYP3A4	RP11-893F2.14	lncRNA
ENSG00000160868.14	ENSG00000166478.9	0.0886293	undirected	CYP3A4	ZNF143	humanTF
ENSG00000160868.14	ENSG00000253519.1	0.0885974	undirected	CYP3A4	AC106801.1	lncRNA
ENSG00000160868.14	ENSG00000258824.2	0.0885239	undirected	CYP3A4	CTD-2555O16.2	lncRNA
ENSG00000160868.14	ENSG00000261671.1	0.0884286	undirected	CYP3A4	RP11-573G6.6	lncRNA
ENSG00000160868.14	ENSG00000120784.15	0.0883674	undirected	CYP3A4	ZFP30	humanTF
ENSG00000160868.14	ENSG00000188227.12	0.0883048	undirected	CYP3A4	ZNF793	humanTF
ENSG00000160868.14	ENSG00000125812.15	0.0882495	undirected	CYP3A4	GZF1	humanTF
ENSG00000160868.14	ENSG00000196843.15	0.0881996	undirected	CYP3A4	ARID5A	humanTF
ENSG00000160868.14	ENSG00000231249.1	0.0880975	undirected	CYP3A4	ITPR1-AS1	lncRNA
ENSG00000160868.14	ENSG00000261663.1	0.0880746	undirected	CYP3A4	RP11-304L19.11	lncRNA
ENSG00000160868.14	ENSG00000271614.1	0.0878521	undirected	CYP3A4	ATP2B1-AS1	lncRNA
ENSG00000160868.14	ENSG00000232386.9	0.0877465	undirected	CYP3A4	RP11-66B24.2	lncRNA
ENSG00000160868.14	ENSG00000136997.16	0.087637	undirected	CYP3A4	MYC	humanTF
ENSG00000160868.14	ENSG00000197497.10	0.0875798	undirected	CYP3A4	ZNF665	humanTF
ENSG00000160868.14	ENSG00000270972.1	0.0875332	undirected	CYP3A4	RP11-326C3.15	lncRNA
ENSG00000160868.14	ENSG00000105991.7	0.0875125	undirected	CYP3A4	HOXA1	humanTF
ENSG00000160868.14	ENSG00000233354.1	0.0874927	undirected	CYP3A4	LINC00028	lncRNA
ENSG00000160868.14	ENSG00000271401.1	0.0874558	undirected	CYP3A4	RP11-171I2.3	lncRNA
ENSG00000160868.14	ENSG00000277369.1	0.0873367	undirected	CYP3A4	RP11-486I11.2	lncRNA
ENSG00000160868.14	ENSG00000260810.1	0.0873031	undirected	CYP3A4	CTD-2547L24.4	lncRNA
ENSG00000160868.14	ENSG00000258646.1	0.0872772	undirected	CYP3A4	RP11-950C14.3	lncRNA
ENSG00000160868.14	ENSG00000270240.2	0.0871568	undirected	CYP3A4	AC015849.2	lncRNA
ENSG00000160868.14	ENSG00000109381.19	0.087081	undirected	CYP3A4	ELF2	humanTF
ENSG00000160868.14	ENSG00000178229.7	0.0870236	undirected	CYP3A4	ZNF543	humanTF
ENSG00000160868.14	ENSG00000273151.1	0.0869774	undirected	CYP3A4	RP11-449P15.2	lncRNA
ENSG00000160868.14	ENSG00000269951.1	0.0869749	undirected	CYP3A4	RP11-797A18.6	lncRNA
ENSG00000160868.14	ENSG00000130844.16	0.0867839	undirected	CYP3A4	ZNF331	humanTF
ENSG00000160868.14	ENSG00000079432.7	0.086531	undirected	CYP3A4	CIC	humanTF
ENSG00000160868.14	ENSG00000181450.17	0.086401	undirected	CYP3A4	ZNF678	humanTF
ENSG00000160868.14	ENSG00000244459.2	0.0863834	undirected	CYP3A4	RP11-1398P2.1	lncRNA
ENSG00000160868.14	ENSG00000254648.1	0.0860562	undirected	CYP3A4	RP11-713P17.4	lncRNA
ENSG00000160868.14	ENSG00000071655.17	0.0859589	undirected	CYP3A4	MBD3	humanTF
ENSG00000160868.14	ENSG00000243230.1	0.0859437	undirected	CYP3A4	RP11-286H14.8	lncRNA
ENSG00000160868.14	ENSG00000220161.4	0.0859196	undirected	CYP3A4	LINC02076	lncRNA
ENSG00000160868.14	ENSG00000272973.1	0.0857355	undirected	CYP3A4	KB-1125A3.11	lncRNA
ENSG00000160868.14	ENSG00000177888.7	0.0856467	undirected	CYP3A4	ZBTB41	humanTF
ENSG00000160868.14	ENSG00000234848.1	0.0856133	undirected	CYP3A4	CTD-3105H18.7	lncRNA
ENSG00000160868.14	ENSG00000127903.13	0.0854169	undirected	CYP3A4	ZNF835	humanTF
ENSG00000160868.14	ENSG00000260259.1	0.0853358	undirected	CYP3A4	LINC02166	lncRNA
ENSG00000160868.14	ENSG00000272646.1	0.0852237	undirected	CYP3A4	RP11-188P17.2	lncRNA
ENSG00000160868.14	ENSG00000253161.5	0.0852127	undirected	CYP3A4	LINC01605	lncRNA
ENSG00000160868.14	ENSG00000225205.5	0.0851517	undirected	CYP3A4	AC093818.1	lncRNA
ENSG00000160868.14	ENSG00000278954.1	0.0849201	undirected	CYP3A4	RP13-415G19.2	lncRNA
ENSG00000160868.14	ENSG00000272356.1	0.0848719	undirected	CYP3A4	RP5-1112D6.8	lncRNA
ENSG00000160868.14	ENSG00000231628.1	0.0848711	undirected	CYP3A4	RP3-355L5.4	lncRNA
ENSG00000160868.14	ENSG00000125820.5	0.0847061	undirected	CYP3A4	NKX2-2	humanTF
ENSG00000160868.14	ENSG00000225938.1	0.0845781	undirected	CYP3A4	RP4-575N6.4	lncRNA
ENSG00000160868.14	ENSG00000189420.8	0.084445	undirected	CYP3A4	ZFP92	humanTF
ENSG00000160868.14	ENSG00000102349.17	0.0844118	undirected	CYP3A4	KLF8	humanTF
ENSG00000160868.14	ENSG00000066827.15	0.0843449	undirected	CYP3A4	ZFAT	humanTF
ENSG00000160868.14	ENSG00000273008.1	0.0840902	undirected	CYP3A4	RP11-351D16.3	lncRNA
ENSG00000160868.14	ENSG00000280027.1	0.084084	undirected	CYP3A4	RP11-44F14.10	lncRNA
ENSG00000160868.14	ENSG00000269646.1	0.0839742	undirected	CYP3A4	CTD-2331H12.7	lncRNA
ENSG00000160868.14	ENSG00000280216.1	0.0839631	undirected	CYP3A4	RP3-333H23.9	lncRNA
ENSG00000160868.14	ENSG00000269815.1	0.0837152	undirected	CYP3A4	CTD-2278I10.4	lncRNA
ENSG00000160868.14	ENSG00000267737.1	0.0836764	undirected	CYP3A4	AC061992.2	lncRNA
ENSG00000160868.14	ENSG00000274001.1	0.0835933	undirected	CYP3A4	RP11-5G9.5	lncRNA
ENSG00000160868.14	ENSG00000260339.1	0.0835837	undirected	CYP3A4	HEXA-AS1	lncRNA
ENSG00000160868.14	ENSG00000280385.1	0.0835279	undirected	CYP3A4	AP000648.5	lncRNA
ENSG00000160868.14	ENSG00000278769.1	0.0833519	undirected	CYP3A4	CTD-2036P10.5	lncRNA
ENSG00000160868.14	ENSG00000171223.5	0.0832811	undirected	CYP3A4	JUNB	humanTF
ENSG00000160868.14	ENSG00000258876.1	0.0832156	undirected	CYP3A4	RP11-270M14.5	lncRNA
ENSG00000160868.14	ENSG00000167232.13	0.0832075	undirected	CYP3A4	ZNF91	humanTF
ENSG00000160868.14	ENSG00000272163.1	0.083161	undirected	CYP3A4	GS1-72M22.1	lncRNA
ENSG00000160868.14	ENSG00000163795.13	0.082962	undirected	CYP3A4	ZNF513	humanTF
ENSG00000160868.14	ENSG00000259623.1	0.0829604	undirected	CYP3A4	RP11-156E6.1	lncRNA
ENSG00000160868.14	ENSG00000132170.19	0.0829401	undirected	CYP3A4	PPARG	humanTF
ENSG00000160868.14	ENSG00000260293.2	0.0828495	undirected	CYP3A4	RP11-715J22.6	lncRNA
ENSG00000160868.14	ENSG00000279166.1	0.0826417	undirected	CYP3A4	RP11-107E5.3	lncRNA
ENSG00000160868.14	ENSG00000267130.1	0.082431	undirected	CYP3A4	CTD-2540B15.9	lncRNA
ENSG00000160868.14	ENSG00000121864.9	0.082373	undirected	CYP3A4	ZNF639	humanTF
ENSG00000160868.14	ENSG00000167981.5	0.0823179	undirected	CYP3A4	ZNF597	humanTF
ENSG00000160868.14	ENSG00000264937.1	0.0821919	undirected	CYP3A4	AC100830.5	lncRNA
ENSG00000160868.14	ENSG00000185219.16	0.0821817	undirected	CYP3A4	ZNF445	humanTF
ENSG00000160868.14	ENSG00000279741.1	0.0821683	undirected	CYP3A4	RP11-44F14.9	lncRNA
ENSG00000160868.14	ENSG00000177932.6	0.082047	undirected	CYP3A4	ZNF354C	humanTF
ENSG00000160868.14	ENSG00000271420.1	0.0819574	undirected	CYP3A4	RP5-1057J7.7	lncRNA
ENSG00000160868.14	ENSG00000186272.12	0.0817108	undirected	CYP3A4	ZNF17	humanTF
ENSG00000160868.14	ENSG00000279948.1	0.081704	undirected	CYP3A4	CTD-2233K9.1	lncRNA
ENSG00000160868.14	ENSG00000251409.1	0.081489	undirected	CYP3A4	AC008592.4	lncRNA
ENSG00000160868.14	ENSG00000258443.1	0.081357	undirected	CYP3A4	RP3-414A15.11	lncRNA
ENSG00000160868.14	ENSG00000268520.1	0.0813009	undirected	CYP3A4	CTD-2616J11.10	lncRNA
ENSG00000160868.14	ENSG00000260219.2	0.0810746	undirected	CYP3A4	CD2BP2-DT	lncRNA
ENSG00000160868.14	ENSG00000267765.1	0.0810616	undirected	CYP3A4	CTD-3193K9.3	lncRNA
ENSG00000160868.14	ENSG00000183734.4	0.0809639	undirected	CYP3A4	ASCL2	humanTF
ENSG00000160868.14	ENSG00000148337.20	0.0808186	undirected	CYP3A4	CIZ1	humanTF
ENSG00000160868.14	ENSG00000197863.8	0.080658	undirected	CYP3A4	ZNF790	humanTF
ENSG00000160868.14	ENSG00000029993.14	0.0805715	undirected	CYP3A4	HMGB3	humanTF
ENSG00000160868.14	ENSG00000232640.1	0.0805309	undirected	CYP3A4	RP1-266L20.2	lncRNA
ENSG00000160868.14	ENSG00000279319.1	0.0804435	undirected	CYP3A4	RP11-693M3.1	lncRNA
ENSG00000160868.14	ENSG00000196724.12	0.0803533	undirected	CYP3A4	ZNF418	humanTF
ENSG00000160868.14	ENSG00000184058.12	0.0802912	undirected	CYP3A4	TBX1	humanTF
ENSG00000160868.14	ENSG00000258405.9	0.080135	undirected	CYP3A4	ZNF578	humanTF
ENSG00000160868.14	ENSG00000271930.1	0.0801237	undirected	CYP3A4	RP11-44N12.5	lncRNA
ENSG00000160868.14	ENSG00000163939.18	0.0800883	undirected	CYP3A4	PBRM1	humanTF
ENSG00000160868.14	ENSG00000225978.3	0.0800573	undirected	CYP3A4	HAR1A	lncRNA
ENSG00000160868.14	ENSG00000228043.5	0.0800036	undirected	CYP3A4	AC097721.2	lncRNA
ENSG00000160868.14	ENSG00000274403.1	0.0799383	undirected	CYP3A4	CTD-2036P10.6	lncRNA
ENSG00000160868.14	ENSG00000198105.13	0.0798798	undirected	CYP3A4	ZNF248	humanTF
ENSG00000160868.14	ENSG00000278112.1	0.079823	undirected	CYP3A4	RP11-972P1.11	lncRNA
ENSG00000160868.14	ENSG00000271778.1	0.0797529	undirected	CYP3A4	RP11-379F4.8	lncRNA
ENSG00000160868.14	ENSG00000227888.4	0.0794725	undirected	CYP3A4	FAM66A	lncRNA
ENSG00000160868.14	ENSG00000277491.1	0.0793806	undirected	CYP3A4	RP11-676J12.9	lncRNA
ENSG00000160868.14	ENSG00000267758.1	0.0793469	undirected	CYP3A4	RP11-358B23.5	lncRNA
ENSG00000160868.14	ENSG00000196214.10	0.0792077	undirected	CYP3A4	ZNF766	humanTF
ENSG00000160868.14	ENSG00000198551.9	0.0790179	undirected	CYP3A4	ZNF627	humanTF
ENSG00000160868.14	ENSG00000236708.1	0.0789673	undirected	CYP3A4	AC073316.1	lncRNA
ENSG00000160868.14	ENSG00000248356.1	0.0786261	undirected	CYP3A4	RP11-557J10.4	lncRNA
ENSG00000160868.14	ENSG00000234694.1	0.0786242	undirected	CYP3A4	RP1-92O14.3	lncRNA
ENSG00000160868.14	ENSG00000089335.20	0.0785436	undirected	CYP3A4	ZNF302	humanTF
ENSG00000160868.14	ENSG00000180458.2	0.0785336	undirected	CYP3A4	CTD-3064H18.4	lncRNA
ENSG00000160868.14	ENSG00000263466.1	0.0784564	undirected	CYP3A4	RP1-56K13.2	lncRNA
ENSG00000160868.14	ENSG00000261441.1	0.0784195	undirected	CYP3A4	RP11-217B1.2	lncRNA
ENSG00000160868.14	ENSG00000281538.1	0.0784047	undirected	CYP3A4	RP4-669P10.20	lncRNA
ENSG00000160868.14	ENSG00000269921.1	0.0782749	undirected	CYP3A4	RP11-646I6.5	lncRNA
ENSG00000160868.14	ENSG00000279631.1	0.078089	undirected	CYP3A4	RP11-573G6.4	lncRNA
ENSG00000160868.14	ENSG00000125520.13	0.0780576	undirected	CYP3A4	SLC2A4RG	humanTF
ENSG00000160868.14	ENSG00000281831.1	0.0780017	undirected	CYP3A4	HCP5B	lncRNA
ENSG00000160868.14	ENSG00000198039.11	0.0779675	undirected	CYP3A4	ZNF273	humanTF
ENSG00000160868.14	ENSG00000236499.2	0.0779603	undirected	CYP3A4	LINC00896	lncRNA
ENSG00000160868.14	ENSG00000189042.13	0.0779495	undirected	CYP3A4	ZNF567	humanTF
ENSG00000160868.14	ENSG00000213762.11	0.0777433	undirected	CYP3A4	ZNF134	humanTF
ENSG00000160868.14	ENSG00000280426.1	0.0776832	undirected	CYP3A4	RP11-837J7.3	lncRNA
ENSG00000160868.14	ENSG00000266473.1	0.0776097	undirected	CYP3A4	RP11-401F2.3	lncRNA
ENSG00000160868.14	ENSG00000274776.1	0.0776008	undirected	CYP3A4	RP11-687F6.5	lncRNA
ENSG00000160868.14	ENSG00000157557.11	0.0775395	undirected	CYP3A4	ETS2	humanTF
ENSG00000160868.14	ENSG00000279568.1	0.0774767	undirected	CYP3A4	RP11-20I23.5	lncRNA
ENSG00000160868.14	ENSG00000250410.1	0.0770605	undirected	CYP3A4	RP11-714G18.1	lncRNA
ENSG00000160868.14	ENSG00000279196.1	0.0768368	undirected	CYP3A4	RP11-1072A3.3	lncRNA
ENSG00000160868.14	ENSG00000196700.8	0.0768195	undirected	CYP3A4	ZNF512B	humanTF
ENSG00000160868.14	ENSG00000120798.16	0.0767404	undirected	CYP3A4	NR2C1	humanTF
ENSG00000160868.14	ENSG00000180357.9	0.0765799	undirected	CYP3A4	ZNF609	humanTF
ENSG00000160868.14	ENSG00000186564.5	0.0763584	undirected	CYP3A4	FOXD2	humanTF
ENSG00000160868.14	ENSG00000276980.1	0.076297	undirected	CYP3A4	CTD-3128G10.7	lncRNA
ENSG00000160868.14	ENSG00000180422.3	0.0762868	undirected	CYP3A4	LINC00304	lncRNA
ENSG00000160868.14	ENSG00000272755.1	0.0762864	undirected	CYP3A4	RP11-326G21.1	lncRNA
ENSG00000160868.14	ENSG00000025434.18	0.0757147	undirected	CYP3A4	NR1H3	humanTF
ENSG00000160868.14	ENSG00000233885.7	0.0756929	undirected	CYP3A4	YEATS2-AS1	lncRNA
ENSG00000160868.14	ENSG00000138375.12	0.0756781	undirected	CYP3A4	SMARCAL1	humanTF
ENSG00000160868.14	ENSG00000213888.3	0.0756272	undirected	CYP3A4	LINC01521	lncRNA
ENSG00000160868.14	ENSG00000179111.8	0.075531	undirected	CYP3A4	HES7	humanTF
ENSG00000160868.14	ENSG00000178338.10	0.0754764	undirected	CYP3A4	ZNF354B	humanTF
ENSG00000160868.14	ENSG00000180869.4	0.0753981	undirected	CYP3A4	LINC01555	lncRNA
ENSG00000160868.14	ENSG00000278864.1	0.0752341	undirected	CYP3A4	RP11-45M22.2	lncRNA
ENSG00000160868.14	ENSG00000131845.14	0.0751096	undirected	CYP3A4	ZNF304	humanTF
ENSG00000160868.14	ENSG00000266998.1	0.0748737	undirected	CYP3A4	RP11-936I5.1	lncRNA
ENSG00000160868.14	ENSG00000135457.9	0.0748662	undirected	CYP3A4	TFCP2	humanTF
ENSG00000160868.14	ENSG00000232850.3	0.0744046	undirected	CYP3A4	PTGES2-AS1	lncRNA
ENSG00000160868.14	ENSG00000160094.14	0.074343	undirected	CYP3A4	ZNF362	humanTF
ENSG00000160868.14	ENSG00000227659.1	0.0743152	undirected	CYP3A4	CLYBL-AS2	lncRNA
ENSG00000160868.14	ENSG00000188095.4	0.0741312	undirected	CYP3A4	MESP2	humanTF
ENSG00000160868.14	ENSG00000269825.1	0.0741131	undirected	CYP3A4	CTD-3099C6.9	lncRNA
ENSG00000160868.14	ENSG00000235072.2	0.074042	undirected	CYP3A4	AC012074.2	lncRNA
ENSG00000160868.14	ENSG00000267100.1	0.0740056	undirected	CYP3A4	ILF3-DT	lncRNA
ENSG00000160868.14	ENSG00000267776.1	0.0739527	undirected	CYP3A4	AC006116.24	lncRNA
ENSG00000160868.14	ENSG00000115568.15	0.0739423	undirected	CYP3A4	ZNF142	humanTF
ENSG00000160868.14	ENSG00000279140.1	0.0738898	undirected	CYP3A4	RP11-477I4.4	lncRNA
ENSG00000160868.14	ENSG00000279232.2	0.0738789	undirected	CYP3A4	CTC-463N11.4	lncRNA
ENSG00000160868.14	ENSG00000267412.1	0.073871	undirected	CYP3A4	CTC-265F19.2	lncRNA
ENSG00000160868.14	ENSG00000280128.1	0.0735179	undirected	CYP3A4	XXbac-BPG283O16.9	lncRNA
ENSG00000160868.14	ENSG00000232412.1	0.0732957	undirected	CYP3A4	LOC101928402	lncRNA
ENSG00000160868.14	ENSG00000150907.7	0.0732936	undirected	CYP3A4	FOXO1	humanTF
ENSG00000160868.14	ENSG00000232104.3	0.0732705	undirected	CYP3A4	RFX3-AS1	lncRNA
ENSG00000160868.14	ENSG00000274312.1	0.0730796	undirected	CYP3A4	RP11-167B3.2	lncRNA
ENSG00000160868.14	ENSG00000164916.10	0.0729277	undirected	CYP3A4	FOXK1	humanTF
ENSG00000160868.14	ENSG00000213015.8	0.0729226	undirected	CYP3A4	ZNF580	humanTF
ENSG00000160868.14	ENSG00000163666.8	0.0728789	undirected	CYP3A4	HESX1	humanTF
ENSG00000160868.14	ENSG00000280383.1	0.0728101	undirected	CYP3A4	CTA-941F9.10	lncRNA
ENSG00000160868.14	ENSG00000180035.12	0.0726783	undirected	CYP3A4	ZNF48	humanTF
ENSG00000160868.14	ENSG00000254004.6	0.0726526	undirected	CYP3A4	ZNF260	humanTF
ENSG00000160868.14	ENSG00000275457.1	0.0726402	undirected	CYP3A4	RP1-198K11.5	lncRNA
ENSG00000160868.14	ENSG00000181722.16	0.0726186	undirected	CYP3A4	ZBTB20	humanTF
ENSG00000160868.14	ENSG00000269473.1	0.0725934	undirected	CYP3A4	CTD-2619J13.19	lncRNA
ENSG00000160868.14	ENSG00000272696.1	0.0719888	undirected	CYP3A4	RP11-339B21.13	lncRNA
ENSG00000160868.14	ENSG00000243081.2	0.0718566	undirected	CYP3A4	RP11-231E6.1	lncRNA
ENSG00000160868.14	ENSG00000224376.1	0.0716039	undirected	CYP3A4	AC017104.6	lncRNA
ENSG00000160868.14	ENSG00000271966.1	0.0713021	undirected	CYP3A4	RP11-7F18.2	lncRNA
ENSG00000160868.14	ENSG00000275111.4	0.0712179	undirected	CYP3A4	ZNF2	humanTF
ENSG00000160868.14	ENSG00000228812.7	0.0711992	undirected	CYP3A4	LAMA5-AS1	lncRNA
ENSG00000160868.14	ENSG00000111269.2	0.0711878	undirected	CYP3A4	CREBL2	humanTF
ENSG00000160868.14	ENSG00000228008.1	0.0710307	undirected	CYP3A4	CTD-2330K9.3	lncRNA
ENSG00000160868.14	ENSG00000269194.1	0.0709232	undirected	CYP3A4	AC006942.4	lncRNA
ENSG00000160868.14	ENSG00000263731.1	0.0706388	undirected	CYP3A4	RP11-498C9.15	lncRNA
ENSG00000160868.14	ENSG00000278341.1	0.0705998	undirected	CYP3A4	RP5-1142A6.10	lncRNA
ENSG00000160868.14	ENSG00000088876.11	0.0703998	undirected	CYP3A4	ZNF343	humanTF
ENSG00000160868.14	ENSG00000265194.1	0.0703767	undirected	CYP3A4	RP11-70L8.4	lncRNA
ENSG00000160868.14	ENSG00000114861.18	0.0701178	undirected	CYP3A4	FOXP1	humanTF
ENSG00000160868.14	ENSG00000160961.11	0.0699699	undirected	CYP3A4	ZNF333	humanTF
ENSG00000160868.14	ENSG00000260473.2	0.0698952	undirected	CYP3A4	RP11-923I11.4	lncRNA
ENSG00000160868.14	ENSG00000260160.1	0.0698727	undirected	CYP3A4	CTC-471J1.2	lncRNA
ENSG00000160868.14	ENSG00000178248.11	0.0696842	undirected	CYP3A4	FAM230I	lncRNA
ENSG00000160868.14	ENSG00000259005.1	0.0696329	undirected	CYP3A4	RP3-449M8.6	lncRNA
ENSG00000160868.14	ENSG00000189298.13	0.0693414	undirected	CYP3A4	ZKSCAN3	humanTF
ENSG00000160868.14	ENSG00000274895.1	0.0693291	undirected	CYP3A4	RP11-478J18.2	lncRNA
ENSG00000160868.14	ENSG00000198455.4	0.0690989	undirected	CYP3A4	ZXDB	humanTF
ENSG00000160868.14	ENSG00000253163.1	0.0690553	undirected	CYP3A4	RP11-443C10.1	lncRNA
ENSG00000160868.14	ENSG00000198205.6	0.0689715	undirected	CYP3A4	ZXDA	humanTF
ENSG00000160868.14	ENSG00000276846.1	0.0689626	undirected	CYP3A4	CTD-3220F14.3	lncRNA
ENSG00000160868.14	ENSG00000197128.11	0.0687455	undirected	CYP3A4	ZNF772	humanTF
ENSG00000160868.14	ENSG00000181472.4	0.0687149	undirected	CYP3A4	ZBTB2	humanTF
ENSG00000160868.14	ENSG00000226800.5	0.0686947	undirected	CYP3A4	CACTIN-AS1	lncRNA
ENSG00000160868.14	ENSG00000279204.1	0.068309	undirected	CYP3A4	RP11-175K6.2	lncRNA
ENSG00000160868.14	ENSG00000267649.1	0.0682254	undirected	CYP3A4	CTD-2587H24.10	lncRNA
ENSG00000160868.14	ENSG00000248544.2	0.0681098	undirected	CYP3A4	CTB-47B11.3	lncRNA
ENSG00000160868.14	ENSG00000234203.1	0.0680646	undirected	CYP3A4	RP5-1050D4.2	lncRNA
ENSG00000160868.14	ENSG00000223776.5	0.0680238	undirected	CYP3A4	LGALS8-AS1	lncRNA
ENSG00000160868.14	ENSG00000253636.1	0.0679194	undirected	CYP3A4	RP11-531A24.5	lncRNA
ENSG00000160868.14	ENSG00000218357.3	0.0679144	undirected	CYP3A4	LINC01644	lncRNA
ENSG00000160868.14	ENSG00000065970.8	0.0678619	undirected	CYP3A4	FOXJ2	humanTF
ENSG00000160868.14	ENSG00000246145.1	0.0678407	undirected	CYP3A4	RRS1-AS1	lncRNA
ENSG00000160868.14	ENSG00000266490.1	0.0677884	undirected	CYP3A4	CTD-2349P21.9	lncRNA
ENSG00000160868.14	ENSG00000232680.2	0.0677212	undirected	CYP3A4	AC002511.3	lncRNA
ENSG00000160868.14	ENSG00000257446.3	0.0675943	undirected	CYP3A4	ZNF878	humanTF
ENSG00000160868.14	ENSG00000181220.15	0.067563	undirected	CYP3A4	ZNF746	humanTF
ENSG00000160868.14	ENSG00000250220.1	0.0673747	undirected	CYP3A4	RP11-692D12.1	lncRNA
ENSG00000160868.14	ENSG00000153560.11	0.067333	undirected	CYP3A4	UBP1	humanTF
ENSG00000160868.14	ENSG00000269952.1	0.0672433	undirected	CYP3A4	RP11-324I22.3	lncRNA
ENSG00000160868.14	ENSG00000233399.2	0.0672187	undirected	CYP3A4	LINC01648	lncRNA
ENSG00000160868.14	ENSG00000260317.1	0.0670321	undirected	CYP3A4	RP11-48B3.4	lncRNA
ENSG00000160868.14	ENSG00000179743.4	0.0670128	undirected	CYP3A4	FLJ37453	lncRNA
ENSG00000160868.14	ENSG00000249258.2	0.0667709	undirected	CYP3A4	RP11-468H14.2	lncRNA
ENSG00000160868.14	ENSG00000261737.1	0.0665604	undirected	CYP3A4	CLCA4-AS1	lncRNA
ENSG00000160868.14	ENSG00000273287.2	0.0665365	undirected	CYP3A4	CTA-268H5.14	lncRNA
ENSG00000160868.14	ENSG00000158055.15	0.0664104	undirected	CYP3A4	GRHL3	humanTF
ENSG00000160868.14	ENSG00000100811.12	0.0663322	undirected	CYP3A4	YY1	humanTF
ENSG00000160868.14	ENSG00000278816.1	0.0662609	undirected	CYP3A4	RP5-1116H23.4	lncRNA
ENSG00000160868.14	ENSG00000260190.1	0.0661323	undirected	CYP3A4	RP11-229P13.25	lncRNA
ENSG00000160868.14	ENSG00000244239.1	0.0660497	undirected	CYP3A4	AC007009.1	lncRNA
ENSG00000160868.14	ENSG00000272909.1	0.0660089	undirected	CYP3A4	CTD-2555O16.4	lncRNA
ENSG00000160868.14	ENSG00000169136.10	0.0657401	undirected	CYP3A4	ATF5	humanTF
ENSG00000160868.14	ENSG00000170949.17	0.065677	undirected	CYP3A4	ZNF160	humanTF
ENSG00000160868.14	ENSG00000158691.14	0.0655848	undirected	CYP3A4	ZSCAN12	humanTF
ENSG00000160868.14	ENSG00000173404.4	0.0655411	undirected	CYP3A4	INSM1	humanTF
ENSG00000160868.14	ENSG00000260465.1	0.0654399	undirected	CYP3A4	RP11-63M22.2	lncRNA
ENSG00000160868.14	ENSG00000260077.1	0.0653889	undirected	CYP3A4	RP11-254F7.2	lncRNA
ENSG00000160868.14	ENSG00000272760.1	0.0652988	undirected	CYP3A4	RP11-5C23.1	lncRNA
ENSG00000160868.14	ENSG00000233214.1	0.0652923	undirected	CYP3A4	AC002511.2	lncRNA
ENSG00000160868.14	ENSG00000234284.6	0.0651128	undirected	CYP3A4	ZNF879	humanTF
ENSG00000160868.14	ENSG00000237797.1	0.0651059	undirected	CYP3A4	RP11-472N13.3	lncRNA
ENSG00000160868.14	ENSG00000274213.1	0.0650965	undirected	CYP3A4	RP11-670E13.6	lncRNA
ENSG00000160868.14	ENSG00000267868.1	0.0650871	undirected	CYP3A4	RP11-120K24.3	lncRNA
ENSG00000160868.14	ENSG00000271889.1	0.064822	undirected	CYP3A4	LOC105374758	lncRNA
ENSG00000160868.14	ENSG00000278276.1	0.0648146	undirected	CYP3A4	RP3-324O17.8	lncRNA
ENSG00000160868.14	ENSG00000226363.3	0.0646598	undirected	CYP3A4	HAGLROS	lncRNA
ENSG00000160868.14	ENSG00000230612.3	0.064548	undirected	CYP3A4	AC004237.1	lncRNA
ENSG00000160868.14	ENSG00000265967.1	0.0642784	undirected	CYP3A4	AC100830.4	lncRNA
ENSG00000160868.14	ENSG00000214029.4	0.0641937	undirected	CYP3A4	ZNF891	humanTF
ENSG00000160868.14	ENSG00000263001.5	0.0641889	undirected	CYP3A4	GTF2I	humanTF
ENSG00000160868.14	ENSG00000272977.1	0.0640328	undirected	CYP3A4	CTA-390C10.10	lncRNA
ENSG00000160868.14	ENSG00000261379.1	0.0640321	undirected	CYP3A4	RP11-395N3.1	lncRNA
ENSG00000160868.14	ENSG00000273374.1	0.0638482	undirected	CYP3A4	RP11-383I23.2	lncRNA
ENSG00000160868.14	ENSG00000143578.15	0.0637841	undirected	CYP3A4	CREB3L4	humanTF
ENSG00000160868.14	ENSG00000260409.1	0.0635711	undirected	CYP3A4	RP11-403B2.7	lncRNA
ENSG00000160868.14	ENSG00000279433.1	0.0633736	undirected	CYP3A4	RP11-4B16.1	lncRNA
ENSG00000160868.14	ENSG00000260439.1	0.0632152	undirected	CYP3A4	LMF1-AS1	lncRNA
ENSG00000160868.14	ENSG00000127124.14	0.0629131	undirected	CYP3A4	HIVEP3	humanTF
ENSG00000160868.14	ENSG00000283445.1	0.0628648	undirected	CYP3A4	RP11-63G10.4	lncRNA
ENSG00000160868.14	ENSG00000197566.9	0.0628636	undirected	CYP3A4	ZNF624	humanTF
ENSG00000160868.14	ENSG00000176222.8	0.0627877	undirected	CYP3A4	ZNF404	humanTF
ENSG00000160868.14	ENSG00000143458.11	0.0627772	undirected	CYP3A4	GABPB2	humanTF
ENSG00000160868.14	ENSG00000232803.1	0.0627736	undirected	CYP3A4	SLCO4A1-AS1	lncRNA
ENSG00000160868.14	ENSG00000262098.1	0.0626879	undirected	CYP3A4	CTD-2561B21.10	lncRNA
ENSG00000160868.14	ENSG00000272541.1	0.0626617	undirected	CYP3A4	XXbac-BPGBPG55C20.1	lncRNA
ENSG00000160868.14	ENSG00000182979.17	0.0625549	undirected	CYP3A4	MTA1	humanTF
ENSG00000160868.14	ENSG00000279192.1	0.062506	undirected	CYP3A4	PWAR5	lncRNA
ENSG00000160868.14	ENSG00000276054.1	0.0623972	undirected	CYP3A4	RP11-378E13.3	lncRNA
ENSG00000160868.14	ENSG00000243795.1	0.0622996	undirected	CYP3A4	LINC02044	lncRNA
ENSG00000160868.14	ENSG00000159140.19	0.062159	undirected	CYP3A4	SON	humanTF
ENSG00000160868.14	ENSG00000166188.2	0.0621125	undirected	CYP3A4	ZNF319	humanTF
ENSG00000160868.14	ENSG00000275964.1	0.0620269	undirected	CYP3A4	RP11-61K9.3	lncRNA
ENSG00000160868.14	ENSG00000225213.2	0.0619465	undirected	CYP3A4	RP11-197M22.2	lncRNA
ENSG00000160868.14	ENSG00000268047.1	0.0619015	undirected	CYP3A4	AC018766.6	lncRNA
ENSG00000160868.14	ENSG00000178150.9	0.0617004	undirected	CYP3A4	ZNF114	humanTF
ENSG00000160868.14	ENSG00000280351.2	0.0616946	undirected	CYP3A4	LOC100129503	lncRNA
ENSG00000160868.14	ENSG00000130684.13	0.0616896	undirected	CYP3A4	ZNF337	humanTF
ENSG00000160868.14	ENSG00000229334.1	0.0616744	undirected	CYP3A4	AC046143.3	lncRNA
ENSG00000160868.14	ENSG00000265399.1	0.0615432	undirected	CYP3A4	RP13-270P17.2	lncRNA
ENSG00000160868.14	ENSG00000230555.2	0.0615374	undirected	CYP3A4	RP11-517P14.2	lncRNA
ENSG00000160868.14	ENSG00000277142.1	0.06134	undirected	CYP3A4	LINC00235	lncRNA
ENSG00000160868.14	ENSG00000005073.5	0.0612936	undirected	CYP3A4	HOXA11	humanTF
ENSG00000160868.14	ENSG00000267072.2	0.061291	undirected	CYP3A4	NAGPA-AS1	lncRNA
ENSG00000160868.14	ENSG00000271918.1	0.0611072	undirected	CYP3A4	CTD-2287O16.5	lncRNA
ENSG00000160868.14	ENSG00000236154.1	0.0609079	undirected	CYP3A4	RP11-343J3.2	lncRNA
ENSG00000160868.14	ENSG00000224739.2	0.0608362	undirected	CYP3A4	AC016735.1	lncRNA
ENSG00000160868.14	ENSG00000273289.1	0.0607551	undirected	CYP3A4	RP6-109B7.5	lncRNA
ENSG00000160868.14	ENSG00000268912.1	0.0605125	undirected	CYP3A4	CTD-2619J13.17	lncRNA
ENSG00000160868.14	ENSG00000272872.1	0.0604869	undirected	CYP3A4	LL22NC03-N14H11.1	lncRNA
ENSG00000160868.14	ENSG00000279656.1	0.0604792	undirected	CYP3A4	RP11-298I3.6	lncRNA
ENSG00000160868.14	ENSG00000266677.1	0.060353	undirected	CYP3A4	RP11-258F1.1	lncRNA
ENSG00000160868.14	ENSG00000167766.18	0.0602964	undirected	CYP3A4	ZNF83	humanTF
ENSG00000160868.14	ENSG00000261490.1	0.0602875	undirected	CYP3A4	RP11-448G15.3	lncRNA
ENSG00000160868.14	ENSG00000259933.6	0.0601637	undirected	CYP3A4	LOC105371049	lncRNA
ENSG00000160868.14	ENSG00000277462.1	0.0600852	undirected	CYP3A4	ZNF670	humanTF
ENSG00000160868.14	ENSG00000282012.1	0.0599273	undirected	CYP3A4	LL22NC03-N95F10.1	lncRNA
ENSG00000160868.14	ENSG00000178734.5	0.0598772	undirected	CYP3A4	LMO7DN	lncRNA
ENSG00000160868.14	ENSG00000152433.14	0.0597045	undirected	CYP3A4	ZNF547	humanTF
ENSG00000160868.14	ENSG00000272564.1	0.0596101	undirected	CYP3A4	RP11-548P2.2	lncRNA
ENSG00000160868.14	ENSG00000196646.11	0.0593693	undirected	CYP3A4	ZNF136	humanTF
ENSG00000160868.14	ENSG00000176236.6	0.0593223	undirected	CYP3A4	RPP38-DT	lncRNA
ENSG00000160868.14	ENSG00000198715.11	0.0591141	undirected	CYP3A4	GLMP	humanTF
ENSG00000160868.14	ENSG00000237481.1	0.0591004	undirected	CYP3A4	RP4-803J11.2	lncRNA
ENSG00000160868.14	ENSG00000261098.1	0.0589988	undirected	CYP3A4	RP11-819C21.1	lncRNA
ENSG00000160868.14	ENSG00000270659.1	0.058785	undirected	CYP3A4	RP11-105N14.1	lncRNA
ENSG00000160868.14	ENSG00000259314.1	0.0585715	undirected	CYP3A4	CTD-3065B20.3	lncRNA
ENSG00000160868.14	ENSG00000196387.9	0.0584721	undirected	CYP3A4	ZNF140	humanTF
ENSG00000160868.14	ENSG00000267058.1	0.0583621	undirected	CYP3A4	LOC100505715	lncRNA
ENSG00000160868.14	ENSG00000283141.1	0.0581589	undirected	CYP3A4	RP11-109A6.5	lncRNA
ENSG00000160868.14	ENSG00000122859.4	0.0580963	undirected	CYP3A4	NEUROG3	humanTF
ENSG00000160868.14	ENSG00000174197.16	0.0579746	undirected	CYP3A4	MGA	humanTF
ENSG00000160868.14	ENSG00000235078.1	0.0579663	undirected	CYP3A4	AC142528.1	lncRNA
ENSG00000160868.14	ENSG00000280231.1	0.0578976	undirected	CYP3A4	LA16c-380F5.3	lncRNA
ENSG00000160868.14	ENSG00000268713.1	0.0576227	undirected	CYP3A4	CTC-444N24.8	lncRNA
ENSG00000160868.14	ENSG00000258441.1	0.0575283	undirected	CYP3A4	LINC00641	lncRNA
ENSG00000160868.14	ENSG00000169057.21	0.0572468	undirected	CYP3A4	MECP2	humanTF
ENSG00000160868.14	ENSG00000167785.8	0.0571621	undirected	CYP3A4	ZNF558	humanTF
ENSG00000160868.14	ENSG00000270108.1	0.0569394	undirected	CYP3A4	RP11-73M18.6	lncRNA
ENSG00000160868.14	ENSG00000236051.7	0.0568975	undirected	CYP3A4	MYCBP2-AS1	lncRNA
ENSG00000160868.14	ENSG00000198429.9	0.0568703	undirected	CYP3A4	ZNF69	humanTF
ENSG00000160868.14	ENSG00000267198.1	0.0568536	undirected	CYP3A4	RP11-798G7.6	lncRNA
ENSG00000160868.14	ENSG00000127081.13	0.0567928	undirected	CYP3A4	ZNF484	humanTF
ENSG00000160868.14	ENSG00000224888.4	0.0567814	undirected	CYP3A4	RP5-1142A6.2	lncRNA
ENSG00000160868.14	ENSG00000274976.1	0.0567288	undirected	CYP3A4	RP11-8P13.5	lncRNA
ENSG00000160868.14	ENSG00000254162.1	0.0564408	undirected	CYP3A4	RP11-48B3.3	lncRNA
ENSG00000160868.14	ENSG00000198740.8	0.055835	undirected	CYP3A4	ZNF652	humanTF
ENSG00000160868.14	ENSG00000152439.12	0.0558019	undirected	CYP3A4	ZNF773	humanTF
ENSG00000160868.14	ENSG00000270000.1	0.0552476	undirected	CYP3A4	RP3-449M8.9	lncRNA
ENSG00000160868.14	ENSG00000253854.1	0.0551421	undirected	CYP3A4	RP11-10N23.2	lncRNA
ENSG00000160868.14	ENSG00000246627.6	0.0550369	undirected	CYP3A4	CACNA1C-AS1	lncRNA
ENSG00000160868.14	ENSG00000260740.2	0.0544132	undirected	CYP3A4	AC026471.6	lncRNA
ENSG00000160868.14	ENSG00000273091.1	0.0543861	undirected	CYP3A4	AP000255.6	lncRNA
ENSG00000160868.14	ENSG00000251661.3	0.0542675	undirected	CYP3A4	RP11-326C3.11	lncRNA
ENSG00000160868.14	ENSG00000270147.1	0.0536187	undirected	CYP3A4	RP11-646I6.6	lncRNA
ENSG00000160868.14	ENSG00000280424.1	0.0534599	undirected	CYP3A4	LOC730668	lncRNA
ENSG00000160868.14	ENSG00000258317.1	0.0533596	undirected	CYP3A4	RP11-603J24.5	lncRNA
ENSG00000160868.14	ENSG00000203280.4	0.0532591	undirected	CYP3A4	KIAA1671-AS1	lncRNA
ENSG00000160868.14	ENSG00000280269.1	0.0531705	undirected	CYP3A4	AP000577.2	lncRNA
ENSG00000160868.14	ENSG00000259994.1	0.0530685	undirected	CYP3A4	RP11-305E6.4	lncRNA
ENSG00000160868.14	ENSG00000122548.5	0.0526443	undirected	CYP3A4	KIAA0087	lncRNA
ENSG00000160868.14	ENSG00000272235.1	0.0519695	undirected	CYP3A4	RP11-22L13.1	lncRNA
ENSG00000160868.14	ENSG00000168661.14	0.0518953	undirected	CYP3A4	ZNF30	humanTF
ENSG00000160868.14	ENSG00000260257.2	0.0518732	undirected	CYP3A4	RP5-1085F17.3	lncRNA
ENSG00000160868.14	ENSG00000270011.6	0.0514632	undirected	CYP3A4	ZNF559-ZNF177	humanTF
ENSG00000160868.14	ENSG00000249602.1	0.0512368	undirected	CYP3A4	RP11-98D18.3	lncRNA
ENSG00000160868.14	ENSG00000130856.15	0.0512196	undirected	CYP3A4	ZNF236	humanTF
ENSG00000160868.14	ENSG00000197024.8	0.0511632	undirected	CYP3A4	ZNF398	humanTF
ENSG00000160868.14	ENSG00000278952.1	0.0509601	undirected	CYP3A4	RP11-399J13.2	lncRNA
ENSG00000160868.14	ENSG00000280374.1	0.0509489	undirected	CYP3A4	RP11-337N6.3	lncRNA
ENSG00000160868.14	ENSG00000117000.8	0.050728	undirected	CYP3A4	RLF	humanTF
ENSG00000160868.14	ENSG00000030419.16	0.0507273	undirected	CYP3A4	IKZF2	humanTF
ENSG00000160868.14	ENSG00000159885.13	0.050507	undirected	CYP3A4	ZNF222	humanTF
ENSG00000160868.14	ENSG00000273893.1	0.0503966	undirected	CYP3A4	RP1-101A2.1	lncRNA
ENSG00000160868.14	ENSG00000263345.1	0.050276	undirected	CYP3A4	RP1-59D14.5	lncRNA
ENSG00000160868.14	ENSG00000168062.9	0.0500584	undirected	CYP3A4	BATF2	humanTF

## Sheet: e-SI_turquoise_CYP3A5
Table S1-5: The TFs, lncRNAs, and miRNAs co-expressed with CYP3A5 in turquoise module in the second group.
From Node	To Node	Weight	direction	From Name	To Name	Type
ENSG00000106258.13	ENSG00000166268.10	0.35533	undirected	CYP3A5	MYRFL	humanTF
ENSG00000106258.13	ENSG00000135100.17	0.345744	undirected	CYP3A5	HNF1A	humanTF
ENSG00000106258.13	ENSG00000130700.6	0.338106	undirected	CYP3A5	GATA5	humanTF
ENSG00000106258.13	ENSG00000144852.17	0.335284	undirected	CYP3A5	NR1I2	humanTF
ENSG00000106258.13	ENSG00000172818.9	0.33326	undirected	CYP3A5	OVOL1	humanTF
ENSG00000106258.13	ENSG00000164749.11	0.332302	undirected	CYP3A5	HNF4G	humanTF
ENSG00000106258.13	ENSG00000275410.4	0.330285	undirected	CYP3A5	HNF1B	humanTF
ENSG00000106258.13	ENSG00000175329.12	0.328327	undirected	CYP3A5	ISX	humanTF
ENSG00000106258.13	ENSG00000125850.10	0.327585	undirected	CYP3A5	OVOL2	humanTF
ENSG00000106258.13	ENSG00000173153.13	0.320692	undirected	CYP3A5	ESRRA	humanTF
ENSG00000106258.13	ENSG00000229719.5	0.319342	undirected	CYP3A5	MIR194-2HG	lncRNA
ENSG00000106258.13	ENSG00000116833.13	0.316438	undirected	CYP3A5	NR5A2	humanTF
ENSG00000106258.13	ENSG00000101076.16	0.316219	undirected	CYP3A5	HNF4A	humanTF
ENSG00000106258.13	ENSG00000117595.10	0.31605	undirected	CYP3A5	IRF6	humanTF
ENSG00000106258.13	ENSG00000111424.10	0.31484	undirected	CYP3A5	VDR	humanTF
ENSG00000106258.13	ENSG00000275234.1	0.313245	undirected	CYP3A5	CTD-2396E7.11	lncRNA
ENSG00000106258.13	ENSG00000261183.5	0.309078	undirected	CYP3A5	SPINT1-AS1	lncRNA
ENSG00000106258.13	ENSG00000043039.6	0.305029	undirected	CYP3A5	BARX2	humanTF
ENSG00000106258.13	ENSG00000012504.13	0.304598	undirected	CYP3A5	NR1H4	humanTF
ENSG00000106258.13	ENSG00000222001.2	0.300991	undirected	CYP3A5	LOC101928881	lncRNA
ENSG00000106258.13	ENSG00000279693.1	0.300528	undirected	CYP3A5	RP11-71L14.3	lncRNA
ENSG00000106258.13	ENSG00000272405.1	0.298932	undirected	CYP3A5	RP11-284F21.10	lncRNA
ENSG00000106258.13	ENSG00000282221.1	0.294655	undirected	CYP3A5	RP11-27G14.4	lncRNA
ENSG00000106258.13	ENSG00000188242.4	0.286796	undirected	CYP3A5	PP7080	lncRNA
ENSG00000106258.13	ENSG00000232354.8	0.286089	undirected	CYP3A5	VIPR1-AS1	lncRNA
ENSG00000106258.13	ENSG00000224721.1	0.285178	undirected	CYP3A5	LOC102724153	lncRNA
ENSG00000106258.13	ENSG00000083307.10	0.285128	undirected	CYP3A5	GRHL2	humanTF
ENSG00000106258.13	ENSG00000060566.13	0.283578	undirected	CYP3A5	CREB3L3	humanTF
ENSG00000106258.13	ENSG00000102554.13	0.279102	undirected	CYP3A5	KLF5	humanTF
ENSG00000106258.13	ENSG00000124920.13	0.277055	undirected	CYP3A5	MYRF	humanTF
ENSG00000106258.13	ENSG00000165556.9	0.275194	undirected	CYP3A5	CDX2	humanTF
ENSG00000106258.13	ENSG00000276633.1	0.270523	undirected	CYP3A5	AJ011931.1	lncRNA
ENSG00000106258.13	ENSG00000261116.1	0.269414	undirected	CYP3A5	RP3-523K23.2	lncRNA
ENSG00000106258.13	ENSG00000160685.13	0.264553	undirected	CYP3A5	ZBTB7B	humanTF
ENSG00000106258.13	ENSG00000172238.4	0.264178	undirected	CYP3A5	ATOH1	humanTF
ENSG00000106258.13	ENSG00000272141.1	0.261281	undirected	CYP3A5	RP11-465B22.8	lncRNA
ENSG00000106258.13	ENSG00000235523.1	0.261094	undirected	CYP3A5	RP11-63P12.7	lncRNA
ENSG00000106258.13	ENSG00000263893.2	0.260396	undirected	CYP3A5	CTD-3010D24.3	lncRNA
ENSG00000106258.13	ENSG00000249453.1	0.259197	undirected	CYP3A5	RP13-497K6.1	lncRNA
ENSG00000106258.13	ENSG00000130675.14	0.25889	undirected	CYP3A5	MNX1	humanTF
ENSG00000106258.13	ENSG00000163435.15	0.257079	undirected	CYP3A5	ELF3	humanTF
ENSG00000106258.13	ENSG00000167800.9	0.25697	undirected	CYP3A5	TBX10	humanTF
ENSG00000106258.13	ENSG00000124664.10	0.255582	undirected	CYP3A5	SPDEF	humanTF
ENSG00000106258.13	ENSG00000272763.1	0.253256	undirected	CYP3A5	RP11-357H14.17	lncRNA
ENSG00000106258.13	ENSG00000113722.16	0.252611	undirected	CYP3A5	CDX1	humanTF
ENSG00000106258.13	ENSG00000251169.2	0.250283	undirected	CYP3A5	LINC01843	lncRNA
ENSG00000106258.13	ENSG00000249007.1	0.250019	undirected	CYP3A5	RP11-510N19.5	lncRNA
ENSG00000106258.13	ENSG00000249685.1	0.249047	undirected	CYP3A5	RP11-360F5.3	lncRNA
ENSG00000106258.13	ENSG00000009950.15	0.248945	undirected	CYP3A5	MLXIPL	humanTF
ENSG00000106258.13	ENSG00000108788.11	0.247842	undirected	CYP3A5	MLX	humanTF
ENSG00000106258.13	ENSG00000129514.5	0.247641	undirected	CYP3A5	FOXA1	humanTF
ENSG00000106258.13	ENSG00000257084.1	0.247489	undirected	CYP3A5	MIR200CHG	lncRNA
ENSG00000106258.13	ENSG00000103460.16	0.246651	undirected	CYP3A5	TOX3	humanTF
ENSG00000106258.13	ENSG00000255474.1	0.246513	undirected	CYP3A5	GAU1	lncRNA
ENSG00000106258.13	ENSG00000269915.1	0.245849	undirected	CYP3A5	AP006621.9	lncRNA
ENSG00000106258.13	ENSG00000132024.17	0.244961	undirected	CYP3A5	CC2D1A	humanTF
ENSG00000106258.13	ENSG00000265763.3	0.243696	undirected	CYP3A5	ZNF488	humanTF
ENSG00000106258.13	ENSG00000253696.2	0.243502	undirected	CYP3A5	KBTBD11-OT1	lncRNA
ENSG00000106258.13	ENSG00000279756.1	0.243166	undirected	CYP3A5	CTD-2385L22.2	lncRNA
ENSG00000106258.13	ENSG00000272079.2	0.243101	undirected	CYP3A5	LA16c-380H5.5	lncRNA
ENSG00000106258.13	ENSG00000254290.1	0.243058	undirected	CYP3A5	RP11-150O12.3	lncRNA
ENSG00000106258.13	ENSG00000234155.1	0.242954	undirected	CYP3A5	LINC02535	lncRNA
ENSG00000106258.13	ENSG00000205890.3	0.242863	undirected	CYP3A5	LOC100128770	lncRNA
ENSG00000106258.13	ENSG00000273971.1	0.242652	undirected	CYP3A5	RP11-77K12.10	lncRNA
ENSG00000106258.13	ENSG00000261286.1	0.242647	undirected	CYP3A5	ATP2C2-AS1	lncRNA
ENSG00000106258.13	ENSG00000260418.1	0.24255	undirected	CYP3A5	RP3-406A7.7	lncRNA
ENSG00000106258.13	ENSG00000279017.1	0.242012	undirected	CYP3A5	RP11-697K23.3	lncRNA
ENSG00000106258.13	ENSG00000260704.1	0.24177	undirected	CYP3A5	LINC00543	lncRNA
ENSG00000106258.13	ENSG00000278912.1	0.241736	undirected	CYP3A5	CTD-2196E14.8	lncRNA
ENSG00000106258.13	ENSG00000272068.1	0.241683	undirected	CYP3A5	RP11-284F21.9	lncRNA
ENSG00000106258.13	ENSG00000131910.4	0.241472	undirected	CYP3A5	NR0B2	humanTF
ENSG00000106258.13	ENSG00000229005.2	0.241399	undirected	CYP3A5	HNF4A-AS1	lncRNA
ENSG00000106258.13	ENSG00000116793.15	0.23992	undirected	CYP3A5	PHTF1	humanTF
ENSG00000106258.13	ENSG00000235029.1	0.239378	undirected	CYP3A5	MNX1-AS2	lncRNA
ENSG00000106258.13	ENSG00000274173.1	0.239256	undirected	CYP3A5	RP4-568C11.4	lncRNA
ENSG00000106258.13	ENSG00000153814.11	0.238417	undirected	CYP3A5	JAZF1	humanTF
ENSG00000106258.13	ENSG00000216560.4	0.237878	undirected	CYP3A5	LINC00955	lncRNA
ENSG00000106258.13	ENSG00000170608.2	0.237533	undirected	CYP3A5	FOXA3	humanTF
ENSG00000106258.13	ENSG00000224093.5	0.237043	undirected	CYP3A5	RP5-1033H22.2	lncRNA
ENSG00000106258.13	ENSG00000261488.1	0.235802	undirected	CYP3A5	TBILA	lncRNA
ENSG00000106258.13	ENSG00000204588.5	0.23524	undirected	CYP3A5	LINC01123	lncRNA
ENSG00000106258.13	ENSG00000249201.2	0.235067	undirected	CYP3A5	CTD-3080P12.3	lncRNA
ENSG00000106258.13	ENSG00000250137.1	0.234472	undirected	CYP3A5	RP11-380P13.1	lncRNA
ENSG00000106258.13	ENSG00000163497.2	0.234324	undirected	CYP3A5	FEV	humanTF
ENSG00000106258.13	ENSG00000258837.1	0.234213	undirected	CYP3A5	CTD-2566J3.1	lncRNA
ENSG00000106258.13	ENSG00000268628.2	0.234204	undirected	CYP3A5	RP1-122P22.4	lncRNA
ENSG00000106258.13	ENSG00000226812.2	0.234021	undirected	CYP3A5	RP5-881L22.5	lncRNA
ENSG00000106258.13	ENSG00000229953.1	0.233822	undirected	CYP3A5	RP11-284F21.7	lncRNA
ENSG00000106258.13	ENSG00000274993.1	0.233632	undirected	CYP3A5	LOC105375431	lncRNA
ENSG00000106258.13	ENSG00000242207.1	0.233039	undirected	CYP3A5	HOXB-AS4	lncRNA
ENSG00000106258.13	ENSG00000141448.8	0.232863	undirected	CYP3A5	GATA6	humanTF
ENSG00000106258.13	ENSG00000261829.1	0.232229	undirected	CYP3A5	RP11-223I10.1	lncRNA
ENSG00000106258.13	ENSG00000237070.1	0.231819	undirected	CYP3A5	LOC105375166	lncRNA
ENSG00000106258.13	ENSG00000260593.1	0.231545	undirected	CYP3A5	RP11-432I5.2	lncRNA
ENSG00000106258.13	ENSG00000225329.3	0.231391	undirected	CYP3A5	LHFPL3-AS2	lncRNA
ENSG00000106258.13	ENSG00000204531.17	0.231216	undirected	CYP3A5	POU5F1	humanTF
ENSG00000106258.13	ENSG00000204876.4	0.229608	undirected	CYP3A5	LOC389602	lncRNA
ENSG00000106258.13	ENSG00000258474.1	0.22935	undirected	CYP3A5	LINC02313	lncRNA
ENSG00000106258.13	ENSG00000261320.1	0.22933	undirected	CYP3A5	RP11-297D21.2	lncRNA
ENSG00000106258.13	ENSG00000237476.1	0.228711	undirected	CYP3A5	LINC01637	lncRNA
ENSG00000106258.13	ENSG00000119042.16	0.227722	undirected	CYP3A5	SATB2	humanTF
ENSG00000106258.13	ENSG00000006047.12	0.227499	undirected	CYP3A5	YBX2	humanTF
ENSG00000106258.13	ENSG00000204934.10	0.227357	undirected	CYP3A5	ATP6V0E2-AS1	lncRNA
ENSG00000106258.13	ENSG00000135373.12	0.226327	undirected	CYP3A5	EHF	humanTF
ENSG00000106258.13	ENSG00000137709.9	0.226022	undirected	CYP3A5	POU2F3	humanTF
ENSG00000106258.13	ENSG00000236377.1	0.225777	undirected	CYP3A5	AC084809.3	lncRNA
ENSG00000106258.13	ENSG00000116132.11	0.225199	undirected	CYP3A5	PRRX1	humanTF
ENSG00000106258.13	ENSG00000166526.16	0.224881	undirected	CYP3A5	ZNF3	humanTF
ENSG00000106258.13	ENSG00000231889.7	0.224447	undirected	CYP3A5	TRAF3IP2-AS1	lncRNA
ENSG00000106258.13	ENSG00000272720.1	0.224355	undirected	CYP3A5	CTA-228A9.3	lncRNA
ENSG00000106258.13	ENSG00000271916.1	0.22354	undirected	CYP3A5	RP11-884K10.6	lncRNA
ENSG00000106258.13	ENSG00000284052.1	0.223069	undirected	CYP3A5	RP11-284E5.1	lncRNA
ENSG00000106258.13	ENSG00000116990.10	0.222731	undirected	CYP3A5	MYCL	humanTF
ENSG00000106258.13	ENSG00000278385.1	0.222716	undirected	CYP3A5	RP11-89H19.2	lncRNA
ENSG00000106258.13	ENSG00000258122.1	0.222693	undirected	CYP3A5	RP11-61A14.1	lncRNA
ENSG00000106258.13	ENSG00000157613.10	0.222591	undirected	CYP3A5	CREB3L1	humanTF
ENSG00000106258.13	ENSG00000262294.1	0.222351	undirected	CYP3A5	RP11-1260E13.2	lncRNA
ENSG00000106258.13	ENSG00000267986.1	0.221643	undirected	CYP3A5	AC130469.2	lncRNA
ENSG00000106258.13	ENSG00000147180.16	0.221595	undirected	CYP3A5	ZNF711	humanTF
ENSG00000106258.13	ENSG00000254988.1	0.221459	undirected	CYP3A5	CTD-2547H18.1	lncRNA
ENSG00000106258.13	ENSG00000272293.1	0.221399	undirected	CYP3A5	RP11-91J19.3	lncRNA
ENSG00000106258.13	ENSG00000069812.11	0.221072	undirected	CYP3A5	HES2	humanTF
ENSG00000106258.13	ENSG00000231748.1	0.220017	undirected	CYP3A5	RP11-227H15.5	lncRNA
ENSG00000106258.13	ENSG00000270403.1	0.219788	undirected	CYP3A5	RP11-35P15.1	lncRNA
ENSG00000106258.13	ENSG00000267709.1	0.219117	undirected	CYP3A5	LOC101928844	lncRNA
ENSG00000106258.13	ENSG00000207926.1	0.219037	undirected	CYP3A5	MIR135A1	miRNA
ENSG00000106258.13	ENSG00000226699.1	0.219033	undirected	CYP3A5	RP11-122K13.7	lncRNA
ENSG00000106258.13	ENSG00000261120.1	0.218692	undirected	CYP3A5	RP11-62H20.1	lncRNA
ENSG00000106258.13	ENSG00000245848.2	0.218399	undirected	CYP3A5	CEBPA	humanTF
ENSG00000106258.13	ENSG00000278041.1	0.218206	undirected	CYP3A5	RP5-984P4.6	lncRNA
ENSG00000106258.13	ENSG00000162992.3	0.21801	undirected	CYP3A5	NEUROD1	humanTF
ENSG00000106258.13	ENSG00000187607.15	0.218009	undirected	CYP3A5	ZNF286A	humanTF
ENSG00000106258.13	ENSG00000235077.1	0.217823	undirected	CYP3A5	AC073842.19	lncRNA
ENSG00000106258.13	ENSG00000185002.9	0.217343	undirected	CYP3A5	RFX6	humanTF
ENSG00000106258.13	ENSG00000189120.4	0.217218	undirected	CYP3A5	SP6	humanTF
ENSG00000106258.13	ENSG00000261294.1	0.217136	undirected	CYP3A5	RP11-616M22.3	lncRNA
ENSG00000106258.13	ENSG00000204528.3	0.217102	undirected	CYP3A5	PSORS1C3	lncRNA
ENSG00000106258.13	ENSG00000056277.15	0.216888	undirected	CYP3A5	ZNF280C	humanTF
ENSG00000106258.13	ENSG00000207652.1	0.216766	undirected	CYP3A5	MIR621	miRNA
ENSG00000106258.13	ENSG00000257660.5	0.216746	undirected	CYP3A5	ADCY6-DT	lncRNA
ENSG00000106258.13	ENSG00000250893.1	0.216254	undirected	CYP3A5	RP11-588L15.2	lncRNA
ENSG00000106258.13	ENSG00000260592.1	0.216159	undirected	CYP3A5	CTA-363E6.6	lncRNA
ENSG00000106258.13	ENSG00000260552.1	0.215934	undirected	CYP3A5	COSMOC	lncRNA
ENSG00000106258.13	ENSG00000125798.14	0.215814	undirected	CYP3A5	FOXA2	humanTF
ENSG00000106258.13	ENSG00000175322.11	0.215726	undirected	CYP3A5	ZNF519	humanTF
ENSG00000106258.13	ENSG00000270988.1	0.215243	undirected	CYP3A5	RP11-439C15.5	lncRNA
ENSG00000106258.13	ENSG00000128710.5	0.215	undirected	CYP3A5	HOXD10	humanTF
ENSG00000106258.13	ENSG00000187792.4	0.214452	undirected	CYP3A5	ZNF70	humanTF
ENSG00000106258.13	ENSG00000227070.1	0.214433	undirected	CYP3A5	RP11-191G24.1	lncRNA
ENSG00000106258.13	ENSG00000279141.3	0.214398	undirected	CYP3A5	LINC01451	lncRNA
ENSG00000106258.13	ENSG00000225762.1	0.214339	undirected	CYP3A5	LINC01389	lncRNA
ENSG00000106258.13	ENSG00000259230.1	0.214084	undirected	CYP3A5	LINC02323	lncRNA
ENSG00000106258.13	ENSG00000273162.1	0.213758	undirected	CYP3A5	RP11-108L7.15	lncRNA
ENSG00000106258.13	ENSG00000278192.1	0.213547	undirected	CYP3A5	RP5-1056H1.2	lncRNA
ENSG00000106258.13	ENSG00000147488.11	0.21352	undirected	CYP3A5	ST18	humanTF
ENSG00000106258.13	ENSG00000275549.1	0.212888	undirected	CYP3A5	STPG3-AS1	lncRNA
ENSG00000106258.13	ENSG00000254859.1	0.212871	undirected	CYP3A5	RP11-661A12.5	lncRNA
ENSG00000106258.13	ENSG00000267711.1	0.212711	undirected	CYP3A5	RP11-686D22.5	lncRNA
ENSG00000106258.13	ENSG00000260996.1	0.212584	undirected	CYP3A5	RP13-122B23.8	lncRNA
ENSG00000106258.13	ENSG00000248309.7	0.212264	undirected	CYP3A5	MEF2C-AS1	lncRNA
ENSG00000106258.13	ENSG00000279348.1	0.212217	undirected	CYP3A5	RP11-566E18.1	lncRNA
ENSG00000106258.13	ENSG00000248663.6	0.211958	undirected	CYP3A5	LINC00992	lncRNA
ENSG00000106258.13	ENSG00000243479.3	0.211786	undirected	CYP3A5	MNX1-AS1	lncRNA
ENSG00000106258.13	ENSG00000267414.1	0.211633	undirected	CYP3A5	SETBP1-DT	lncRNA
ENSG00000106258.13	ENSG00000272234.1	0.211486	undirected	CYP3A5	CTD-2325A15.5	lncRNA
ENSG00000106258.13	ENSG00000261266.2	0.211266	undirected	CYP3A5	CTD-2196E14.5	lncRNA
ENSG00000106258.13	ENSG00000126003.6	0.211181	undirected	CYP3A5	PLAGL2	humanTF
ENSG00000106258.13	ENSG00000115355.15	0.211109	undirected	CYP3A5	CCDC88A	humanTF
ENSG00000106258.13	ENSG00000169131.11	0.211105	undirected	CYP3A5	ZNF354A	humanTF
ENSG00000106258.13	ENSG00000257702.3	0.211017	undirected	CYP3A5	LBX2-AS1	lncRNA
ENSG00000106258.13	ENSG00000125482.12	0.210689	undirected	CYP3A5	TTF1	humanTF
ENSG00000106258.13	ENSG00000265933.5	0.210686	undirected	CYP3A5	LINC00668	lncRNA
ENSG00000106258.13	ENSG00000139154.14	0.210108	undirected	CYP3A5	AEBP2	humanTF
ENSG00000106258.13	ENSG00000228643.1	0.209927	undirected	CYP3A5	AC079779.4	lncRNA
ENSG00000106258.13	ENSG00000171295.12	0.209876	undirected	CYP3A5	ZNF440	humanTF
ENSG00000106258.13	ENSG00000261437.1	0.209742	undirected	CYP3A5	LOC100288748	lncRNA
ENSG00000106258.13	ENSG00000251637.6	0.209545	undirected	CYP3A5	RP11-119D9.1	lncRNA
ENSG00000106258.13	ENSG00000146676.8	0.209296	undirected	CYP3A5	PURB	humanTF
ENSG00000106258.13	ENSG00000267150.1	0.208813	undirected	CYP3A5	RP11-411B10.2	lncRNA
ENSG00000106258.13	ENSG00000174282.11	0.208695	undirected	CYP3A5	ZBTB4	humanTF
ENSG00000106258.13	ENSG00000224276.1	0.208608	undirected	CYP3A5	ARHGEF2-AS1	lncRNA
ENSG00000106258.13	ENSG00000261068.2	0.208567	undirected	CYP3A5	RP11-7K24.3	lncRNA
ENSG00000106258.13	ENSG00000261713.6	0.208437	undirected	CYP3A5	SSTR5-AS1	lncRNA
ENSG00000106258.13	ENSG00000203645.2	0.207932	undirected	CYP3A5	LINC00501	lncRNA
ENSG00000106258.13	ENSG00000160973.7	0.207899	undirected	CYP3A5	FOXH1	humanTF
ENSG00000106258.13	ENSG00000267139.1	0.207603	undirected	CYP3A5	AC005262.3	lncRNA
ENSG00000106258.13	ENSG00000267940.1	0.207587	undirected	CYP3A5	RP11-290F24.6	lncRNA
ENSG00000106258.13	ENSG00000124613.8	0.207342	undirected	CYP3A5	ZNF391	humanTF
ENSG00000106258.13	ENSG00000262558.1	0.20724	undirected	CYP3A5	RP11-1260E13.3	lncRNA
ENSG00000106258.13	ENSG00000172819.16	0.207096	undirected	CYP3A5	RARG	humanTF
ENSG00000106258.13	ENSG00000270419.1	0.207011	undirected	CYP3A5	CAHM	lncRNA
ENSG00000106258.13	ENSG00000258534.1	0.206984	undirected	CYP3A5	CTD-2134A5.4	lncRNA
ENSG00000106258.13	ENSG00000135111.15	0.206967	undirected	CYP3A5	TBX3	humanTF
ENSG00000106258.13	ENSG00000179388.8	0.206795	undirected	CYP3A5	EGR3	humanTF
ENSG00000106258.13	ENSG00000188171.15	0.20668	undirected	CYP3A5	ZNF626	humanTF
ENSG00000106258.13	ENSG00000196793.13	0.20664	undirected	CYP3A5	ZNF239	humanTF
ENSG00000106258.13	ENSG00000111145.7	0.206629	undirected	CYP3A5	ELK3	humanTF
ENSG00000106258.13	ENSG00000275437.1	0.206564	undirected	CYP3A5	RP5-908M14.10	lncRNA
ENSG00000106258.13	ENSG00000152926.14	0.206235	undirected	CYP3A5	ZNF117	humanTF
ENSG00000106258.13	ENSG00000104447.12	0.206079	undirected	CYP3A5	TRPS1	humanTF
ENSG00000106258.13	ENSG00000226380.9	0.205984	undirected	CYP3A5	AC058791.1	lncRNA
ENSG00000106258.13	ENSG00000059728.10	0.205953	undirected	CYP3A5	MXD1	humanTF
ENSG00000106258.13	ENSG00000238184.1	0.205905	undirected	CYP3A5	CD81-AS1	lncRNA
ENSG00000106258.13	ENSG00000205189.11	0.205842	undirected	CYP3A5	ZBTB10	humanTF
ENSG00000106258.13	ENSG00000238045.9	0.20579	undirected	CYP3A5	AC009133.12	lncRNA
ENSG00000106258.13	ENSG00000114439.18	0.205727	undirected	CYP3A5	BBX	humanTF
ENSG00000106258.13	ENSG00000179528.15	0.205719	undirected	CYP3A5	LBX2	humanTF
ENSG00000106258.13	ENSG00000183734.4	0.205578	undirected	CYP3A5	ASCL2	humanTF
ENSG00000106258.13	ENSG00000122877.15	0.205559	undirected	CYP3A5	EGR2	humanTF
ENSG00000106258.13	ENSG00000250740.1	0.205419	undirected	CYP3A5	RP11-710F7.2	lncRNA
ENSG00000106258.13	ENSG00000101190.12	0.205251	undirected	CYP3A5	TCFL5	humanTF
ENSG00000106258.13	ENSG00000231233.1	0.204795	undirected	CYP3A5	CFAP58-AS1	lncRNA
ENSG00000106258.13	ENSG00000231226.1	0.204429	undirected	CYP3A5	TRIM31-AS1	lncRNA
ENSG00000106258.13	ENSG00000232093.1	0.204203	undirected	CYP3A5	DCST1-AS1	lncRNA
ENSG00000106258.13	ENSG00000231062.1	0.203894	undirected	CYP3A5	AC103563.9	lncRNA
ENSG00000106258.13	ENSG00000260487.1	0.203885	undirected	CYP3A5	RP11-297C4.3	lncRNA
ENSG00000106258.13	ENSG00000234928.1	0.203796	undirected	CYP3A5	LINC01659	lncRNA
ENSG00000106258.13	ENSG00000278126.1	0.203709	undirected	CYP3A5	RP11-454E5.4	lncRNA
ENSG00000106258.13	ENSG00000258792.4	0.203628	undirected	CYP3A5	LOC105370616	lncRNA
ENSG00000106258.13	ENSG00000264575.1	0.203584	undirected	CYP3A5	LINC00526	lncRNA
ENSG00000106258.13	ENSG00000271795.1	0.203538	undirected	CYP3A5	CTC-251D13.1	lncRNA
ENSG00000106258.13	ENSG00000273108.1	0.203523	undirected	CYP3A5	RP11-416N2.4	lncRNA
ENSG00000106258.13	ENSG00000276434.1	0.203457	undirected	CYP3A5	RP11-391H12.8	lncRNA
ENSG00000106258.13	ENSG00000115966.16	0.203375	undirected	CYP3A5	ATF2	humanTF
ENSG00000106258.13	ENSG00000272510.1	0.203256	undirected	CYP3A5	RP4-680D5.8	lncRNA
ENSG00000106258.13	ENSG00000278376.1	0.203245	undirected	CYP3A5	RP11-158I9.8	lncRNA
ENSG00000106258.13	ENSG00000178573.6	0.203133	undirected	CYP3A5	MAF	humanTF
ENSG00000106258.13	ENSG00000259954.1	0.203122	undirected	CYP3A5	IL21R-AS1	lncRNA
ENSG00000106258.13	ENSG00000173039.18	0.202865	undirected	CYP3A5	RELA	humanTF
ENSG00000106258.13	ENSG00000235772.1	0.202839	undirected	CYP3A5	AP001625.6	lncRNA
ENSG00000106258.13	ENSG00000128645.14	0.202542	undirected	CYP3A5	HOXD1	humanTF
ENSG00000106258.13	ENSG00000261211.1	0.202515	undirected	CYP3A5	RP1-80N2.3	lncRNA
ENSG00000106258.13	ENSG00000175745.11	0.20247	undirected	CYP3A5	NR2F1	humanTF
ENSG00000106258.13	ENSG00000279302.3	0.202439	undirected	CYP3A5	RP11-16P20.4	lncRNA
ENSG00000106258.13	ENSG00000106331.15	0.202301	undirected	CYP3A5	PAX4	humanTF
ENSG00000106258.13	ENSG00000268516.2	0.202257	undirected	CYP3A5	LOC105372482	lncRNA
ENSG00000106258.13	ENSG00000196437.10	0.202216	undirected	CYP3A5	ZNF569	humanTF
ENSG00000106258.13	ENSG00000004848.7	0.202216	undirected	CYP3A5	ARX	humanTF
ENSG00000106258.13	ENSG00000260265.1	0.202084	undirected	CYP3A5	RP11-44F21.5	lncRNA
ENSG00000106258.13	ENSG00000279427.1	0.201978	undirected	CYP3A5	RP11-132F7.2	lncRNA
ENSG00000106258.13	ENSG00000269973.1	0.201686	undirected	CYP3A5	RP11-95D17.1	lncRNA
ENSG00000106258.13	ENSG00000258053.1	0.201523	undirected	CYP3A5	CTD-2021H9.3	lncRNA
ENSG00000106258.13	ENSG00000270761.1	0.20141	undirected	CYP3A5	RP11-385F7.1	lncRNA
ENSG00000106258.13	ENSG00000262714.1	0.20084	undirected	CYP3A5	RP11-44F14.8	lncRNA
ENSG00000106258.13	ENSG00000213963.6	0.200794	undirected	CYP3A5	LOC100130691	lncRNA
ENSG00000106258.13	ENSG00000228170.1	0.200725	undirected	CYP3A5	RP1-40E16.11	lncRNA
ENSG00000106258.13	ENSG00000272189.1	0.200422	undirected	CYP3A5	RP3-325F22.5	lncRNA
ENSG00000106258.13	ENSG00000152217.16	0.200232	undirected	CYP3A5	SETBP1	humanTF
ENSG00000106258.13	ENSG00000198963.10	0.199665	undirected	CYP3A5	RORB	humanTF
ENSG00000106258.13	ENSG00000255050.1	0.199456	undirected	CYP3A5	RP11-661A12.9	lncRNA
ENSG00000106258.13	ENSG00000279353.1	0.1994	undirected	CYP3A5	RP11-864N7.4	lncRNA
ENSG00000106258.13	ENSG00000272989.1	0.199273	undirected	CYP3A5	LINC02012	lncRNA
ENSG00000106258.13	ENSG00000007372.21	0.199112	undirected	CYP3A5	PAX6	humanTF
ENSG00000106258.13	ENSG00000279805.1	0.198952	undirected	CYP3A5	CTA-212A2.1	lncRNA
ENSG00000106258.13	ENSG00000165702.13	0.198853	undirected	CYP3A5	GFI1B	humanTF
ENSG00000106258.13	ENSG00000257086.1	0.198801	undirected	CYP3A5	RP11-783K16.13	lncRNA
ENSG00000106258.13	ENSG00000235192.1	0.198761	undirected	CYP3A5	AC009495.2	lncRNA
ENSG00000106258.13	ENSG00000258735.1	0.198729	undirected	CYP3A5	LINC00637	lncRNA
ENSG00000106258.13	ENSG00000236194.3	0.198629	undirected	CYP3A5	AC003104.1	lncRNA
ENSG00000106258.13	ENSG00000181894.14	0.19859	undirected	CYP3A5	ZNF329	humanTF
ENSG00000106258.13	ENSG00000258376.2	0.198581	undirected	CYP3A5	RP4-647C14.2	lncRNA
ENSG00000106258.13	ENSG00000113580.14	0.198426	undirected	CYP3A5	NR3C1	humanTF
ENSG00000106258.13	ENSG00000018869.16	0.197676	undirected	CYP3A5	ZNF582	humanTF
ENSG00000106258.13	ENSG00000160321.14	0.197357	undirected	CYP3A5	ZNF208	humanTF
ENSG00000106258.13	ENSG00000167635.11	0.197019	undirected	CYP3A5	ZNF146	humanTF
ENSG00000106258.13	ENSG00000257883.1	0.196984	undirected	CYP3A5	RP11-497G19.1	lncRNA
ENSG00000106258.13	ENSG00000270182.1	0.196637	undirected	CYP3A5	RP1-170O19.24	lncRNA
ENSG00000106258.13	ENSG00000260464.1	0.196572	undirected	CYP3A5	RP4-561L24.3	lncRNA
ENSG00000106258.13	ENSG00000260196.1	0.196481	undirected	CYP3A5	RP1-239B22.5	lncRNA
ENSG00000106258.13	ENSG00000233360.4	0.196388	undirected	CYP3A5	PDXP-DT	lncRNA
ENSG00000106258.13	ENSG00000271576.1	0.196294	undirected	CYP3A5	RP11-486G15.2	lncRNA
ENSG00000106258.13	ENSG00000066827.15	0.1962	undirected	CYP3A5	ZFAT	humanTF
ENSG00000106258.13	ENSG00000081386.12	0.195836	undirected	CYP3A5	ZNF510	humanTF
ENSG00000106258.13	ENSG00000276533.1	0.195695	undirected	CYP3A5	RP11-139H15.5	lncRNA
ENSG00000106258.13	ENSG00000227188.1	0.195574	undirected	CYP3A5	MGAT3-AS1	lncRNA
ENSG00000106258.13	ENSG00000274029.1	0.195453	undirected	CYP3A5	RP11-340F14.6	lncRNA
ENSG00000106258.13	ENSG00000197050.10	0.19527	undirected	CYP3A5	ZNF420	humanTF
ENSG00000106258.13	ENSG00000180479.13	0.195059	undirected	CYP3A5	ZNF571	humanTF
ENSG00000106258.13	ENSG00000280832.1	0.195019	undirected	CYP3A5	ST3GAL4-AS1	lncRNA
ENSG00000106258.13	ENSG00000245869.2	0.194831	undirected	CYP3A5	RP11-158I9.5	lncRNA
ENSG00000106258.13	ENSG00000219665.8	0.194738	undirected	CYP3A5	ZNF433-AS1	lncRNA
ENSG00000106258.13	ENSG00000185650.9	0.194589	undirected	CYP3A5	ZFP36L1	humanTF
ENSG00000106258.13	ENSG00000234699.1	0.194314	undirected	CYP3A5	RP11-225H22.4	lncRNA
ENSG00000106258.13	ENSG00000226029.1	0.194299	undirected	CYP3A5	LINC01772	lncRNA
ENSG00000106258.13	ENSG00000261959.1	0.194295	undirected	CYP3A5	RP11-893F2.14	lncRNA
ENSG00000106258.13	ENSG00000130584.10	0.194259	undirected	CYP3A5	ZBTB46	humanTF
ENSG00000106258.13	ENSG00000260398.1	0.194247	undirected	CYP3A5	RP11-594N15.3	lncRNA
ENSG00000106258.13	ENSG00000277829.1	0.194007	undirected	CYP3A5	RP5-1054A22.4	lncRNA
ENSG00000106258.13	ENSG00000271815.1	0.193968	undirected	CYP3A5	CTD-2235C13.3	lncRNA
ENSG00000106258.13	ENSG00000258593.2	0.193834	undirected	CYP3A5	CTD-3051D23.4	lncRNA
ENSG00000106258.13	ENSG00000164920.9	0.193656	undirected	CYP3A5	OSR2	humanTF
ENSG00000106258.13	ENSG00000196460.12	0.193204	undirected	CYP3A5	RFX8	humanTF
ENSG00000106258.13	ENSG00000279377.1	0.193189	undirected	CYP3A5	AC003973.3	lncRNA
ENSG00000106258.13	ENSG00000279368.1	0.192932	undirected	CYP3A5	RP1-80N2.4	lncRNA
ENSG00000106258.13	ENSG00000265971.1	0.192555	undirected	CYP3A5	RP11-269G24.6	lncRNA
ENSG00000106258.13	ENSG00000272267.2	0.191943	undirected	CYP3A5	RP11-375N15.2	lncRNA
ENSG00000106258.13	ENSG00000124782.19	0.191877	undirected	CYP3A5	RREB1	humanTF
ENSG00000106258.13	ENSG00000219159.4	0.191801	undirected	CYP3A5	AC011298.2	lncRNA
ENSG00000106258.13	ENSG00000125618.16	0.191673	undirected	CYP3A5	PAX8	humanTF
ENSG00000106258.13	ENSG00000122691.12	0.191502	undirected	CYP3A5	TWIST1	humanTF
ENSG00000106258.13	ENSG00000166478.9	0.191067	undirected	CYP3A5	ZNF143	humanTF
ENSG00000106258.13	ENSG00000249459.8	0.190647	undirected	CYP3A5	ZNF286B	humanTF
ENSG00000106258.13	ENSG00000185252.18	0.190461	undirected	CYP3A5	ZNF74	humanTF
ENSG00000106258.13	ENSG00000254461.1	0.190384	undirected	CYP3A5	RP11-755F10.3	lncRNA
ENSG00000106258.13	ENSG00000267197.1	0.190243	undirected	CYP3A5	CTC-429L19.3	lncRNA
ENSG00000106258.13	ENSG00000181444.12	0.190209	undirected	CYP3A5	ZNF467	humanTF
ENSG00000106258.13	ENSG00000016082.14	0.1902	undirected	CYP3A5	ISL1	humanTF
ENSG00000106258.13	ENSG00000264012.1	0.190124	undirected	CYP3A5	RP11-627G18.2	lncRNA
ENSG00000106258.13	ENSG00000234961.1	0.189949	undirected	CYP3A5	RP11-124N14.3	lncRNA
ENSG00000106258.13	ENSG00000260121.1	0.189789	undirected	CYP3A5	RP5-1142A6.9	lncRNA
ENSG00000106258.13	ENSG00000272008.1	0.189641	undirected	CYP3A5	RP11-393I2.4	lncRNA
ENSG00000106258.13	ENSG00000182873.5	0.189542	undirected	CYP3A5	PRKCZ-AS1	lncRNA
ENSG00000106258.13	ENSG00000253395.1	0.189441	undirected	CYP3A5	KB-1460A1.1	lncRNA
ENSG00000106258.13	ENSG00000115112.7	0.189325	undirected	CYP3A5	TFCP2L1	humanTF
ENSG00000106258.13	ENSG00000236137.1	0.189308	undirected	CYP3A5	LOC101929099	lncRNA
ENSG00000106258.13	ENSG00000275025.1	0.189212	undirected	CYP3A5	RP5-875H18.10	lncRNA
ENSG00000106258.13	ENSG00000237989.1	0.189142	undirected	CYP3A5	LINC01679	lncRNA
ENSG00000106258.13	ENSG00000259354.5	0.18902	undirected	CYP3A5	RP11-519G16.3	lncRNA
ENSG00000106258.13	ENSG00000268756.1	0.188973	undirected	CYP3A5	AC104534.2	lncRNA
ENSG00000106258.13	ENSG00000273923.1	0.188649	undirected	CYP3A5	CTD-2536I1.3	lncRNA
ENSG00000106258.13	ENSG00000169740.13	0.188551	undirected	CYP3A5	ZNF32	humanTF
ENSG00000106258.13	ENSG00000254064.1	0.188468	undirected	CYP3A5	LOC100507071	lncRNA
ENSG00000106258.13	ENSG00000262362.1	0.188357	undirected	CYP3A5	LA16c-380H5.2	lncRNA
ENSG00000106258.13	ENSG00000213793.5	0.188353	undirected	CYP3A5	ZNF888	humanTF
ENSG00000106258.13	ENSG00000225205.5	0.188239	undirected	CYP3A5	AC093818.1	lncRNA
ENSG00000106258.13	ENSG00000253986.1	0.188222	undirected	CYP3A5	CTC-756D1.3	lncRNA
ENSG00000106258.13	ENSG00000255328.1	0.188214	undirected	CYP3A5	RP11-326C3.12	lncRNA
ENSG00000106258.13	ENSG00000269155.2	0.187986	undirected	CYP3A5	LOC441179	lncRNA
ENSG00000106258.13	ENSG00000270964.1	0.187703	undirected	CYP3A5	RP11-502I4.3	lncRNA
ENSG00000106258.13	ENSG00000267934.1	0.187605	undirected	CYP3A5	CTB-176F20.3	lncRNA
ENSG00000106258.13	ENSG00000258256.1	0.187586	undirected	CYP3A5	RP11-219B4.5	lncRNA
ENSG00000106258.13	ENSG00000185869.14	0.187488	undirected	CYP3A5	ZNF829	humanTF
ENSG00000106258.13	ENSG00000258443.1	0.187487	undirected	CYP3A5	RP3-414A15.11	lncRNA
ENSG00000106258.13	ENSG00000196381.10	0.187426	undirected	CYP3A5	ZNF781	humanTF
ENSG00000106258.13	ENSG00000268069.2	0.18742	undirected	CYP3A5	RP5-1057I20.4	lncRNA
ENSG00000106258.13	ENSG00000271983.1	0.187376	undirected	CYP3A5	RP11-28H5.2	lncRNA
ENSG00000106258.13	ENSG00000279418.1	0.187283	undirected	CYP3A5	LINC00244	lncRNA
ENSG00000106258.13	ENSG00000181007.8	0.18723	undirected	CYP3A5	ZFP82	humanTF
ENSG00000106258.13	ENSG00000278107.1	0.187194	undirected	CYP3A5	RP11-162A12.4	lncRNA
ENSG00000106258.13	ENSG00000283635.1	0.186252	undirected	CYP3A5	RP11-5O24.1	lncRNA
ENSG00000106258.13	ENSG00000227359.1	0.186128	undirected	CYP3A5	AC017074.2	lncRNA
ENSG00000106258.13	ENSG00000074657.13	0.186115	undirected	CYP3A5	ZNF532	humanTF
ENSG00000106258.13	ENSG00000271969.1	0.186096	undirected	CYP3A5	U47924.29	lncRNA
ENSG00000106258.13	ENSG00000237009.2	0.18597	undirected	CYP3A5	GLIS3-AS1	lncRNA
ENSG00000106258.13	ENSG00000125812.15	0.185941	undirected	CYP3A5	GZF1	humanTF
ENSG00000106258.13	ENSG00000198342.9	0.185782	undirected	CYP3A5	ZNF442	humanTF
ENSG00000106258.13	ENSG00000228172.5	0.18578	undirected	CYP3A5	RP1-317E23.3	lncRNA
ENSG00000106258.13	ENSG00000152784.15	0.185599	undirected	CYP3A5	PRDM8	humanTF
ENSG00000106258.13	ENSG00000186017.14	0.185596	undirected	CYP3A5	ZNF566	humanTF
ENSG00000106258.13	ENSG00000005436.13	0.185554	undirected	CYP3A5	GCFC2	humanTF
ENSG00000106258.13	ENSG00000271833.1	0.185342	undirected	CYP3A5	RP11-356B19.11	lncRNA
ENSG00000106258.13	ENSG00000073282.12	0.185184	undirected	CYP3A5	TP63	humanTF
ENSG00000106258.13	ENSG00000241886.1	0.185161	undirected	CYP3A5	RP11-242C19.2	lncRNA
ENSG00000106258.13	ENSG00000198453.12	0.185033	undirected	CYP3A5	ZNF568	humanTF
ENSG00000106258.13	ENSG00000131788.15	0.184835	undirected	CYP3A5	PIAS3	humanTF
ENSG00000106258.13	ENSG00000272374.1	0.184576	undirected	CYP3A5	RP3-329A5.8	lncRNA
ENSG00000106258.13	ENSG00000261504.1	0.184524	undirected	CYP3A5	LINC01686	lncRNA
ENSG00000106258.13	ENSG00000189420.8	0.184456	undirected	CYP3A5	ZFP92	humanTF
ENSG00000106258.13	ENSG00000268157.1	0.184215	undirected	CYP3A5	AC010524.4	lncRNA
ENSG00000106258.13	ENSG00000272447.1	0.183794	undirected	CYP3A5	LOC642361	lncRNA
ENSG00000106258.13	ENSG00000197251.3	0.183759	undirected	CYP3A5	LINC00336	lncRNA
ENSG00000106258.13	ENSG00000151500.14	0.18373	undirected	CYP3A5	THYN1	humanTF
ENSG00000106258.13	ENSG00000025156.12	0.183688	undirected	CYP3A5	HSF2	humanTF
ENSG00000106258.13	ENSG00000278058.1	0.183657	undirected	CYP3A5	RP11-70D24.2	lncRNA
ENSG00000106258.13	ENSG00000161298.17	0.18365	undirected	CYP3A5	ZNF382	humanTF
ENSG00000106258.13	ENSG00000029993.14	0.183375	undirected	CYP3A5	HMGB3	humanTF
ENSG00000106258.13	ENSG00000225335.3	0.183284	undirected	CYP3A5	XXbac-B476C20.9	lncRNA
ENSG00000106258.13	ENSG00000250790.4	0.18313	undirected	CYP3A5	RP11-46H11.3	lncRNA
ENSG00000106258.13	ENSG00000271401.1	0.183114	undirected	CYP3A5	RP11-171I2.3	lncRNA
ENSG00000106258.13	ENSG00000266680.1	0.183063	undirected	CYP3A5	RP5-1148A21.3	lncRNA
ENSG00000106258.13	ENSG00000237457.6	0.183058	undirected	CYP3A5	LINC01351	lncRNA
ENSG00000106258.13	ENSG00000273403.1	0.182996	undirected	CYP3A5	RP11-329B9.3	lncRNA
ENSG00000106258.13	ENSG00000266651.1	0.182804	undirected	CYP3A5	RP11-138I1.3	lncRNA
ENSG00000106258.13	ENSG00000267765.1	0.182401	undirected	CYP3A5	CTD-3193K9.3	lncRNA
ENSG00000106258.13	ENSG00000010030.13	0.182241	undirected	CYP3A5	ETV7	humanTF
ENSG00000106258.13	ENSG00000272170.1	0.182129	undirected	CYP3A5	RP11-387M24.5	lncRNA
ENSG00000106258.13	ENSG00000186272.12	0.182103	undirected	CYP3A5	ZNF17	humanTF
ENSG00000106258.13	ENSG00000256897.1	0.18199	undirected	CYP3A5	RP11-17G12.2	lncRNA
ENSG00000106258.13	ENSG00000221923.8	0.181734	undirected	CYP3A5	ZNF880	humanTF
ENSG00000106258.13	ENSG00000177732.8	0.181729	undirected	CYP3A5	SOX12	humanTF
ENSG00000106258.13	ENSG00000261189.1	0.181558	undirected	CYP3A5	RP3-512B11.3	lncRNA
ENSG00000106258.13	ENSG00000259444.1	0.181364	undirected	CYP3A5	RP11-736N17.8	lncRNA
ENSG00000106258.13	ENSG00000264301.1	0.18123	undirected	CYP3A5	LINC01444	lncRNA
ENSG00000106258.13	ENSG00000180861.9	0.181144	undirected	CYP3A5	LINC01559	lncRNA
ENSG00000106258.13	ENSG00000236499.2	0.181114	undirected	CYP3A5	LINC00896	lncRNA
ENSG00000106258.13	ENSG00000279227.1	0.18094	undirected	CYP3A5	AC009303.2	lncRNA
ENSG00000106258.13	ENSG00000091831.22	0.180836	undirected	CYP3A5	ESR1	humanTF
ENSG00000106258.13	ENSG00000276417.1	0.180815	undirected	CYP3A5	RP11-266K4.13	lncRNA
ENSG00000106258.13	ENSG00000169554.18	0.180675	undirected	CYP3A5	ZEB2	humanTF
ENSG00000106258.13	ENSG00000230148.8	0.180641	undirected	CYP3A5	HOXB-AS1	lncRNA
ENSG00000106258.13	ENSG00000232874.1	0.180538	undirected	CYP3A5	RP11-135A1.2	lncRNA
ENSG00000106258.13	ENSG00000259351.1	0.180412	undirected	CYP3A5	LOC101928988	lncRNA
ENSG00000106258.13	ENSG00000233354.1	0.180147	undirected	CYP3A5	LINC00028	lncRNA
ENSG00000106258.13	ENSG00000241770.1	0.179999	undirected	CYP3A5	RP11-555M1.3	lncRNA
ENSG00000106258.13	ENSG00000187815.9	0.179989	undirected	CYP3A5	ZFP69	humanTF
ENSG00000106258.13	ENSG00000203684.5	0.179883	undirected	CYP3A5	IBA57-DT	lncRNA
ENSG00000106258.13	ENSG00000167034.9	0.179722	undirected	CYP3A5	NKX3-1	humanTF
ENSG00000106258.13	ENSG00000274964.1	0.179562	undirected	CYP3A5	RP11-817I4.1	lncRNA
ENSG00000106258.13	ENSG00000270571.2	0.179373	undirected	CYP3A5	RP11-355F16.1	lncRNA
ENSG00000106258.13	ENSG00000227053.1	0.179329	undirected	CYP3A5	MUC12-AS1	lncRNA
ENSG00000106258.13	ENSG00000279232.2	0.17912	undirected	CYP3A5	CTC-463N11.4	lncRNA
ENSG00000106258.13	ENSG00000253477.5	0.178893	undirected	CYP3A5	RP11-1C8.4	lncRNA
ENSG00000106258.13	ENSG00000162714.12	0.178843	undirected	CYP3A5	ZNF496	humanTF
ENSG00000106258.13	ENSG00000196233.12	0.178761	undirected	CYP3A5	LCOR	humanTF
ENSG00000106258.13	ENSG00000280587.1	0.17863	undirected	CYP3A5	LINC01348	lncRNA
ENSG00000106258.13	ENSG00000247317.3	0.178619	undirected	CYP3A5	RP11-273G15.2	lncRNA
ENSG00000106258.13	ENSG00000186777.11	0.178336	undirected	CYP3A5	ZNF732	humanTF
ENSG00000106258.13	ENSG00000121864.9	0.178319	undirected	CYP3A5	ZNF639	humanTF
ENSG00000106258.13	ENSG00000224251.6	0.178318	undirected	CYP3A5	RP11-499O7.7	lncRNA
ENSG00000106258.13	ENSG00000134107.4	0.178166	undirected	CYP3A5	BHLHE40	humanTF
ENSG00000106258.13	ENSG00000120784.15	0.178021	undirected	CYP3A5	ZFP30	humanTF
ENSG00000106258.13	ENSG00000005102.12	0.177805	undirected	CYP3A5	MEOX1	humanTF
ENSG00000106258.13	ENSG00000197279.3	0.177694	undirected	CYP3A5	ZNF165	humanTF
ENSG00000106258.13	ENSG00000168826.15	0.177533	undirected	CYP3A5	ZBTB49	humanTF
ENSG00000106258.13	ENSG00000197863.8	0.177297	undirected	CYP3A5	ZNF790	humanTF
ENSG00000106258.13	ENSG00000178386.12	0.177105	undirected	CYP3A5	ZNF223	humanTF
ENSG00000106258.13	ENSG00000272973.1	0.177097	undirected	CYP3A5	KB-1125A3.11	lncRNA
ENSG00000106258.13	ENSG00000243055.1	0.177081	undirected	CYP3A5	GK-AS1	lncRNA
ENSG00000106258.13	ENSG00000280304.1	0.177043	undirected	CYP3A5	CTD-2536I1.2	lncRNA
ENSG00000106258.13	ENSG00000274554.1	0.177038	undirected	CYP3A5	RP11-240G22.5	lncRNA
ENSG00000106258.13	ENSG00000122482.20	0.176988	undirected	CYP3A5	ZNF644	humanTF
ENSG00000106258.13	ENSG00000125820.5	0.17698	undirected	CYP3A5	NKX2-2	humanTF
ENSG00000106258.13	ENSG00000280027.1	0.176911	undirected	CYP3A5	RP11-44F14.10	lncRNA
ENSG00000106258.13	ENSG00000276691.1	0.176897	undirected	CYP3A5	RP5-1057I20.5	lncRNA
ENSG00000106258.13	ENSG00000258876.1	0.176677	undirected	CYP3A5	RP11-270M14.5	lncRNA
ENSG00000106258.13	ENSG00000188227.12	0.176657	undirected	CYP3A5	ZNF793	humanTF
ENSG00000106258.13	ENSG00000255389.1	0.176613	undirected	CYP3A5	C6orf3	lncRNA
ENSG00000106258.13	ENSG00000262585.1	0.176405	undirected	CYP3A5	LINC01979	lncRNA
ENSG00000106258.13	ENSG00000177932.6	0.175509	undirected	CYP3A5	ZNF354C	humanTF
ENSG00000106258.13	ENSG00000258405.9	0.175505	undirected	CYP3A5	ZNF578	humanTF
ENSG00000106258.13	ENSG00000229692.3	0.175172	undirected	CYP3A5	SOS1-IT1	lncRNA
ENSG00000106258.13	ENSG00000258824.2	0.175094	undirected	CYP3A5	CTD-2555O16.2	lncRNA
ENSG00000106258.13	ENSG00000178229.7	0.175052	undirected	CYP3A5	ZNF543	humanTF
ENSG00000106258.13	ENSG00000276075.1	0.174952	undirected	CYP3A5	AC027682.6	lncRNA
ENSG00000106258.13	ENSG00000265800.1	0.17488	undirected	CYP3A5	RP11-649A18.5	lncRNA
ENSG00000106258.13	ENSG00000232386.9	0.174742	undirected	CYP3A5	RP11-66B24.2	lncRNA
ENSG00000106258.13	ENSG00000228150.1	0.174716	undirected	CYP3A5	RP11-84A14.4	lncRNA
ENSG00000106258.13	ENSG00000227888.4	0.174707	undirected	CYP3A5	FAM66A	lncRNA
ENSG00000106258.13	ENSG00000280303.2	0.174594	undirected	CYP3A5	ERICD	lncRNA
ENSG00000106258.13	ENSG00000159592.10	0.174538	undirected	CYP3A5	GPBP1L1	humanTF
ENSG00000106258.13	ENSG00000233834.6	0.174395	undirected	CYP3A5	LOC100506098	lncRNA
ENSG00000106258.13	ENSG00000232756.1	0.174379	undirected	CYP3A5	RP5-1185I7.1	lncRNA
ENSG00000106258.13	ENSG00000224805.2	0.174249	undirected	CYP3A5	LINC00853	lncRNA
ENSG00000106258.13	ENSG00000235545.1	0.174239	undirected	CYP3A5	RP11-230B22.1	lncRNA
ENSG00000106258.13	ENSG00000260352.1	0.174158	undirected	CYP3A5	CTD-2288F12.1	lncRNA
ENSG00000106258.13	ENSG00000267296.2	0.174026	undirected	CYP3A5	CEBPA-DT	lncRNA
ENSG00000106258.13	ENSG00000127903.13	0.173866	undirected	CYP3A5	ZNF835	humanTF
ENSG00000106258.13	ENSG00000231249.1	0.173808	undirected	CYP3A5	ITPR1-AS1	lncRNA
ENSG00000106258.13	ENSG00000226330.1	0.173408	undirected	CYP3A5	RP11-739N20.2	lncRNA
ENSG00000106258.13	ENSG00000164330.16	0.173149	undirected	CYP3A5	EBF1	humanTF
ENSG00000106258.13	ENSG00000254389.3	0.173054	undirected	CYP3A5	RHPN1-AS1	lncRNA
ENSG00000106258.13	ENSG00000271806.1	0.173041	undirected	CYP3A5	RP5-892K4.1	lncRNA
ENSG00000106258.13	ENSG00000236609.3	0.172539	undirected	CYP3A5	ZNF853	humanTF
ENSG00000106258.13	ENSG00000084093.16	0.172483	undirected	CYP3A5	REST	humanTF
ENSG00000106258.13	ENSG00000197497.10	0.172196	undirected	CYP3A5	ZNF665	humanTF
ENSG00000106258.13	ENSG00000234160.1	0.172009	undirected	CYP3A5	RP11-613M10.6	lncRNA
ENSG00000106258.13	ENSG00000231050.1	0.171768	undirected	CYP3A5	RP1-140A9.1	lncRNA
ENSG00000106258.13	ENSG00000255992.1	0.171432	undirected	CYP3A5	RP11-417L19.4	lncRNA
ENSG00000106258.13	ENSG00000127528.5	0.171287	undirected	CYP3A5	KLF2	humanTF
ENSG00000106258.13	ENSG00000198358.4	0.171182	undirected	CYP3A5	LOC101928372	lncRNA
ENSG00000106258.13	ENSG00000186564.5	0.171107	undirected	CYP3A5	FOXD2	humanTF
ENSG00000106258.13	ENSG00000264937.1	0.171042	undirected	CYP3A5	AC100830.5	lncRNA
ENSG00000106258.13	ENSG00000141040.14	0.17085	undirected	CYP3A5	ZNF287	humanTF
ENSG00000106258.13	ENSG00000274849.1	0.170469	undirected	CYP3A5	RP11-49I11.4	lncRNA
ENSG00000106258.13	ENSG00000109381.19	0.170281	undirected	CYP3A5	ELF2	humanTF
ENSG00000106258.13	ENSG00000196345.12	0.169991	undirected	CYP3A5	ZKSCAN7	humanTF
ENSG00000106258.13	ENSG00000185122.10	0.169986	undirected	CYP3A5	HSF1	humanTF
ENSG00000106258.13	ENSG00000130844.16	0.169935	undirected	CYP3A5	ZNF331	humanTF
ENSG00000106258.13	ENSG00000263786.1	0.169779	undirected	CYP3A5	RP11-649A18.4	lncRNA
ENSG00000106258.13	ENSG00000277491.1	0.16976	undirected	CYP3A5	RP11-676J12.9	lncRNA
ENSG00000106258.13	ENSG00000207650.1	0.169633	undirected	CYP3A5	MIR570	miRNA
ENSG00000106258.13	ENSG00000185219.16	0.169547	undirected	CYP3A5	ZNF445	humanTF
ENSG00000106258.13	ENSG00000169714.16	0.169535	undirected	CYP3A5	CNBP	humanTF
ENSG00000106258.13	ENSG00000180357.9	0.169456	undirected	CYP3A5	ZNF609	humanTF
ENSG00000106258.13	ENSG00000274776.1	0.169437	undirected	CYP3A5	RP11-687F6.5	lncRNA
ENSG00000106258.13	ENSG00000261188.1	0.169287	undirected	CYP3A5	CTA-445C9.14	lncRNA
ENSG00000106258.13	ENSG00000148337.20	0.169271	undirected	CYP3A5	CIZ1	humanTF
ENSG00000106258.13	ENSG00000223552.1	0.169119	undirected	CYP3A5	RP11-24F11.2	lncRNA
ENSG00000106258.13	ENSG00000180869.4	0.168502	undirected	CYP3A5	LINC01555	lncRNA
ENSG00000106258.13	ENSG00000263823.1	0.168367	undirected	CYP3A5	RP11-326K13.4	lncRNA
ENSG00000106258.13	ENSG00000248936.1	0.168343	undirected	CYP3A5	RP11-36B15.1	lncRNA
ENSG00000106258.13	ENSG00000272183.1	0.168286	undirected	CYP3A5	RP11-523H20.3	lncRNA
ENSG00000106258.13	ENSG00000268006.1	0.167986	undirected	CYP3A5	PTOV1-AS1	lncRNA
ENSG00000106258.13	ENSG00000215458.8	0.167962	undirected	CYP3A5	AATBC	lncRNA
ENSG00000106258.13	ENSG00000196700.8	0.1675	undirected	CYP3A5	ZNF512B	humanTF
ENSG00000106258.13	ENSG00000263050.1	0.167424	undirected	CYP3A5	RP11-667K14.3	lncRNA
ENSG00000106258.13	ENSG00000180422.3	0.166941	undirected	CYP3A5	LINC00304	lncRNA
ENSG00000106258.13	ENSG00000228043.5	0.166933	undirected	CYP3A5	AC097721.2	lncRNA
ENSG00000106258.13	ENSG00000177888.7	0.166805	undirected	CYP3A5	ZBTB41	humanTF
ENSG00000106258.13	ENSG00000181722.16	0.16662	undirected	CYP3A5	ZBTB20	humanTF
ENSG00000106258.13	ENSG00000280186.1	0.166319	undirected	CYP3A5	RP11-483I13.6	lncRNA
ENSG00000106258.13	ENSG00000186766.7	0.1661	undirected	CYP3A5	FOXI2	humanTF
ENSG00000106258.13	ENSG00000232850.3	0.165957	undirected	CYP3A5	PTGES2-AS1	lncRNA
ENSG00000106258.13	ENSG00000272092.1	0.165938	undirected	CYP3A5	RP11-350N15.5	lncRNA
ENSG00000106258.13	ENSG00000233214.1	0.165884	undirected	CYP3A5	AC002511.2	lncRNA
ENSG00000106258.13	ENSG00000246528.3	0.165689	undirected	CYP3A5	LOC101929759	lncRNA
ENSG00000106258.13	ENSG00000214717.11	0.16567	undirected	CYP3A5	ZBED1	humanTF
ENSG00000106258.13	ENSG00000267776.1	0.165559	undirected	CYP3A5	AC006116.24	lncRNA
ENSG00000106258.13	ENSG00000198039.11	0.165325	undirected	CYP3A5	ZNF273	humanTF
ENSG00000106258.13	ENSG00000254614.2	0.164981	undirected	CYP3A5	LOC728975	lncRNA
ENSG00000106258.13	ENSG00000242852.6	0.164929	undirected	CYP3A5	ZNF709	humanTF
ENSG00000106258.13	ENSG00000225075.1	0.164803	undirected	CYP3A5	RP11-426L16.3	lncRNA
ENSG00000106258.13	ENSG00000213762.11	0.164785	undirected	CYP3A5	ZNF134	humanTF
ENSG00000106258.13	ENSG00000232412.1	0.164773	undirected	CYP3A5	LOC101928402	lncRNA
ENSG00000106258.13	ENSG00000125520.13	0.164489	undirected	CYP3A5	SLC2A4RG	humanTF
ENSG00000106258.13	ENSG00000162702.7	0.164271	undirected	CYP3A5	ZNF281	humanTF
ENSG00000106258.13	ENSG00000280216.1	0.164171	undirected	CYP3A5	RP3-333H23.9	lncRNA
ENSG00000106258.13	ENSG00000254648.1	0.164009	undirected	CYP3A5	RP11-713P17.4	lncRNA
ENSG00000106258.13	ENSG00000280385.1	0.163866	undirected	CYP3A5	AP000648.5	lncRNA
ENSG00000106258.13	ENSG00000279319.1	0.163761	undirected	CYP3A5	RP11-693M3.1	lncRNA
ENSG00000106258.13	ENSG00000105991.7	0.163677	undirected	CYP3A5	HOXA1	humanTF
ENSG00000106258.13	ENSG00000079432.7	0.163594	undirected	CYP3A5	CIC	humanTF
ENSG00000106258.13	ENSG00000231628.1	0.163423	undirected	CYP3A5	RP3-355L5.4	lncRNA
ENSG00000106258.13	ENSG00000077150.18	0.163255	undirected	CYP3A5	NFKB2	humanTF
ENSG00000106258.13	ENSG00000272009.1	0.163176	undirected	CYP3A5	RP1-313I6.12	lncRNA
ENSG00000106258.13	ENSG00000236772.1	0.162935	undirected	CYP3A5	RP5-1184F4.5	lncRNA
ENSG00000106258.13	ENSG00000254703.2	0.162818	undirected	CYP3A5	SENCR	lncRNA
ENSG00000106258.13	ENSG00000253636.1	0.162709	undirected	CYP3A5	RP11-531A24.5	lncRNA
ENSG00000106258.13	ENSG00000261671.1	0.16264	undirected	CYP3A5	RP11-573G6.6	lncRNA
ENSG00000106258.13	ENSG00000266998.1	0.162617	undirected	CYP3A5	RP11-936I5.1	lncRNA
ENSG00000106258.13	ENSG00000232680.2	0.162502	undirected	CYP3A5	AC002511.3	lncRNA
ENSG00000106258.13	ENSG00000197062.11	0.162307	undirected	CYP3A5	ZSCAN26	humanTF
ENSG00000106258.13	ENSG00000273172.1	0.162238	undirected	CYP3A5	LINC02091	lncRNA
ENSG00000106258.13	ENSG00000267288.2	0.162152	undirected	CYP3A5	LOC105371795	lncRNA
ENSG00000106258.13	ENSG00000269921.1	0.162036	undirected	CYP3A5	RP11-646I6.5	lncRNA
ENSG00000106258.13	ENSG00000278743.1	0.162007	undirected	CYP3A5	RP11-707G18.1	lncRNA
ENSG00000106258.13	ENSG00000274403.1	0.161727	undirected	CYP3A5	CTD-2036P10.6	lncRNA
ENSG00000106258.13	ENSG00000279035.1	0.161544	undirected	CYP3A5	RP11-649A18.3	lncRNA
ENSG00000106258.13	ENSG00000250410.1	0.161511	undirected	CYP3A5	RP11-714G18.1	lncRNA
ENSG00000106258.13	ENSG00000253161.5	0.161481	undirected	CYP3A5	LINC01605	lncRNA
ENSG00000106258.13	ENSG00000269376.1	0.161416	undirected	CYP3A5	RP11-120K24.5	lncRNA
ENSG00000106258.13	ENSG00000150347.14	0.161343	undirected	CYP3A5	ARID5B	humanTF
ENSG00000106258.13	ENSG00000227659.1	0.161271	undirected	CYP3A5	CLYBL-AS2	lncRNA
ENSG00000106258.13	ENSG00000227963.1	0.161265	undirected	CYP3A5	RBM15-AS1	lncRNA
ENSG00000106258.13	ENSG00000271614.1	0.16123	undirected	CYP3A5	ATP2B1-AS1	lncRNA
ENSG00000106258.13	ENSG00000143578.15	0.1611	undirected	CYP3A5	CREB3L4	humanTF
ENSG00000106258.13	ENSG00000173545.4	0.160948	undirected	CYP3A5	ZNF622	humanTF
ENSG00000106258.13	ENSG00000243230.1	0.160862	undirected	CYP3A5	RP11-286H14.8	lncRNA
ENSG00000106258.13	ENSG00000228126.1	0.160744	undirected	CYP3A5	FALEC	lncRNA
ENSG00000106258.13	ENSG00000161642.17	0.160721	undirected	CYP3A5	ZNF385A	humanTF
ENSG00000106258.13	ENSG00000225978.3	0.160564	undirected	CYP3A5	HAR1A	lncRNA
ENSG00000106258.13	ENSG00000114861.18	0.160331	undirected	CYP3A5	FOXP1	humanTF
ENSG00000106258.13	ENSG00000237133.1	0.160054	undirected	CYP3A5	AC020594.5	lncRNA
ENSG00000106258.13	ENSG00000279741.1	0.159902	undirected	CYP3A5	RP11-44F14.9	lncRNA
ENSG00000106258.13	ENSG00000131845.14	0.159899	undirected	CYP3A5	ZNF304	humanTF
ENSG00000106258.13	ENSG00000278991.1	0.159649	undirected	CYP3A5	RP11-797A18.5	lncRNA
ENSG00000106258.13	ENSG00000270972.1	0.159587	undirected	CYP3A5	RP11-326C3.15	lncRNA
ENSG00000106258.13	ENSG00000274895.1	0.159128	undirected	CYP3A5	RP11-478J18.2	lncRNA
ENSG00000106258.13	ENSG00000270240.2	0.159076	undirected	CYP3A5	AC015849.2	lncRNA
ENSG00000106258.13	ENSG00000267412.1	0.159064	undirected	CYP3A5	CTC-265F19.2	lncRNA
ENSG00000106258.13	ENSG00000272696.1	0.158969	undirected	CYP3A5	RP11-339B21.13	lncRNA
ENSG00000106258.13	ENSG00000265656.1	0.158945	undirected	CYP3A5	RP11-13N13.6	lncRNA
ENSG00000106258.13	ENSG00000259623.1	0.158385	undirected	CYP3A5	RP11-156E6.1	lncRNA
ENSG00000106258.13	ENSG00000180035.12	0.158287	undirected	CYP3A5	ZNF48	humanTF
ENSG00000106258.13	ENSG00000137166.14	0.158225	undirected	CYP3A5	FOXP4	humanTF
ENSG00000106258.13	ENSG00000261468.1	0.15813	undirected	CYP3A5	RP11-1024P17.1	lncRNA
ENSG00000106258.13	ENSG00000232710.1	0.158126	undirected	CYP3A5	RP4-669P10.16	lncRNA
ENSG00000106258.13	ENSG00000272755.1	0.158112	undirected	CYP3A5	RP11-326G21.1	lncRNA
ENSG00000106258.13	ENSG00000243081.2	0.158111	undirected	CYP3A5	RP11-231E6.1	lncRNA
ENSG00000106258.13	ENSG00000196724.12	0.158026	undirected	CYP3A5	ZNF418	humanTF
ENSG00000106258.13	ENSG00000173404.4	0.15788	undirected	CYP3A5	INSM1	humanTF
ENSG00000106258.13	ENSG00000277369.1	0.157299	undirected	CYP3A5	RP11-486I11.2	lncRNA
ENSG00000106258.13	ENSG00000224739.2	0.157266	undirected	CYP3A5	AC016735.1	lncRNA
ENSG00000106258.13	ENSG00000274737.1	0.157243	undirected	CYP3A5	RP5-1057I20.6	lncRNA
ENSG00000106258.13	ENSG00000214797.3	0.157198	undirected	CYP3A5	RP11-1036E20.9	lncRNA
ENSG00000106258.13	ENSG00000273008.1	0.157127	undirected	CYP3A5	RP11-351D16.3	lncRNA
ENSG00000106258.13	ENSG00000233399.2	0.157053	undirected	CYP3A5	LINC01648	lncRNA
ENSG00000106258.13	ENSG00000254872.3	0.15693	undirected	CYP3A5	LINC02688	lncRNA
ENSG00000106258.13	ENSG00000160961.11	0.156833	undirected	CYP3A5	ZNF333	humanTF
ENSG00000106258.13	ENSG00000229660.1	0.15678	undirected	CYP3A5	RP5-1142J19.1	lncRNA
ENSG00000106258.13	ENSG00000126767.17	0.156735	undirected	CYP3A5	ELK1	humanTF
ENSG00000106258.13	ENSG00000188321.13	0.156634	undirected	CYP3A5	ZNF559	humanTF
ENSG00000106258.13	ENSG00000280245.1	0.156355	undirected	CYP3A5	RP11-466A19.4	lncRNA
ENSG00000106258.13	ENSG00000279212.1	0.155955	undirected	CYP3A5	RP13-16H11.8	lncRNA
ENSG00000106258.13	ENSG00000115568.15	0.155874	undirected	CYP3A5	ZNF142	humanTF
ENSG00000106258.13	ENSG00000180458.2	0.155816	undirected	CYP3A5	CTD-3064H18.4	lncRNA
ENSG00000106258.13	ENSG00000157557.11	0.155815	undirected	CYP3A5	ETS2	humanTF
ENSG00000106258.13	ENSG00000234694.1	0.155776	undirected	CYP3A5	RP1-92O14.3	lncRNA
ENSG00000106258.13	ENSG00000179111.8	0.155291	undirected	CYP3A5	HES7	humanTF
ENSG00000106258.13	ENSG00000249709.7	0.155275	undirected	CYP3A5	ZNF564	humanTF
ENSG00000106258.13	ENSG00000279583.1	0.155272	undirected	CYP3A5	RP11-368N21.5	lncRNA
ENSG00000106258.13	ENSG00000167981.5	0.155137	undirected	CYP3A5	ZNF597	humanTF
ENSG00000106258.13	ENSG00000150907.7	0.15506	undirected	CYP3A5	FOXO1	humanTF
ENSG00000106258.13	ENSG00000278916.1	0.154798	undirected	CYP3A5	CEP83-DT	lncRNA
ENSG00000106258.13	ENSG00000250312.6	0.154738	undirected	CYP3A5	ZNF718	humanTF
ENSG00000106258.13	ENSG00000272646.1	0.154627	undirected	CYP3A5	RP11-188P17.2	lncRNA
ENSG00000106258.13	ENSG00000164916.10	0.154568	undirected	CYP3A5	FOXK1	humanTF
ENSG00000106258.13	ENSG00000173451.6	0.154449	undirected	CYP3A5	THAP2	humanTF
ENSG00000106258.13	ENSG00000233885.7	0.154224	undirected	CYP3A5	YEATS2-AS1	lncRNA
ENSG00000106258.13	ENSG00000196843.15	0.154185	undirected	CYP3A5	ARID5A	humanTF
ENSG00000106258.13	ENSG00000267868.1	0.153786	undirected	CYP3A5	RP11-120K24.3	lncRNA
ENSG00000106258.13	ENSG00000245910.8	0.15369	undirected	CYP3A5	SNHG6	lncRNA
ENSG00000106258.13	ENSG00000260219.2	0.15364	undirected	CYP3A5	CD2BP2-DT	lncRNA
ENSG00000106258.13	ENSG00000089335.20	0.153576	undirected	CYP3A5	ZNF302	humanTF
ENSG00000106258.13	ENSG00000088876.11	0.153389	undirected	CYP3A5	ZNF343	humanTF
ENSG00000106258.13	ENSG00000270095.1	0.15335	undirected	CYP3A5	RP11-214K3.18	lncRNA
ENSG00000106258.13	ENSG00000269951.1	0.153221	undirected	CYP3A5	RP11-797A18.6	lncRNA
ENSG00000106258.13	ENSG00000234848.1	0.153034	undirected	CYP3A5	CTD-3105H18.7	lncRNA
ENSG00000106258.13	ENSG00000166188.2	0.152273	undirected	CYP3A5	ZNF319	humanTF
ENSG00000106258.13	ENSG00000196214.10	0.152095	undirected	CYP3A5	ZNF766	humanTF
ENSG00000106258.13	ENSG00000163795.13	0.151991	undirected	CYP3A5	ZNF513	humanTF
ENSG00000106258.13	ENSG00000272163.1	0.151929	undirected	CYP3A5	GS1-72M22.1	lncRNA
ENSG00000106258.13	ENSG00000271778.1	0.151659	undirected	CYP3A5	RP11-379F4.8	lncRNA
ENSG00000106258.13	ENSG00000269646.1	0.15162	undirected	CYP3A5	CTD-2331H12.7	lncRNA
ENSG00000106258.13	ENSG00000159556.9	0.151604	undirected	CYP3A5	ISL2	humanTF
ENSG00000106258.13	ENSG00000198551.9	0.151461	undirected	CYP3A5	ZNF627	humanTF
ENSG00000106258.13	ENSG00000244459.2	0.150965	undirected	CYP3A5	RP11-1398P2.1	lncRNA
ENSG00000106258.13	ENSG00000271930.1	0.150813	undirected	CYP3A5	RP11-44N12.5	lncRNA
ENSG00000106258.13	ENSG00000236986.6	0.150684	undirected	CYP3A5	RP11-544A12.4	lncRNA
ENSG00000106258.13	ENSG00000065970.8	0.150615	undirected	CYP3A5	FOXJ2	humanTF
ENSG00000106258.13	ENSG00000204304.11	0.150393	undirected	CYP3A5	PBX2	humanTF
ENSG00000106258.13	ENSG00000261663.1	0.150206	undirected	CYP3A5	RP11-304L19.11	lncRNA
ENSG00000106258.13	ENSG00000258646.1	0.150045	undirected	CYP3A5	RP11-950C14.3	lncRNA
ENSG00000106258.13	ENSG00000160094.14	0.150008	undirected	CYP3A5	ZNF362	humanTF
ENSG00000106258.13	ENSG00000253519.1	0.149896	undirected	CYP3A5	AC106801.1	lncRNA
ENSG00000106258.13	ENSG00000163939.18	0.149757	undirected	CYP3A5	PBRM1	humanTF
ENSG00000106258.13	ENSG00000181220.15	0.149732	undirected	CYP3A5	ZNF746	humanTF
ENSG00000106258.13	ENSG00000250220.1	0.149573	undirected	CYP3A5	RP11-692D12.1	lncRNA
ENSG00000106258.13	ENSG00000279528.1	0.14943	undirected	CYP3A5	RP11-1148L6.8	lncRNA
ENSG00000106258.13	ENSG00000198455.4	0.149062	undirected	CYP3A5	ZXDB	humanTF
ENSG00000106258.13	ENSG00000025434.18	0.148892	undirected	CYP3A5	NR1H3	humanTF
ENSG00000106258.13	ENSG00000260339.1	0.148748	undirected	CYP3A5	HEXA-AS1	lncRNA
ENSG00000106258.13	ENSG00000157657.14	0.147952	undirected	CYP3A5	ZNF618	humanTF
ENSG00000106258.13	ENSG00000271420.1	0.147607	undirected	CYP3A5	RP5-1057J7.7	lncRNA
ENSG00000106258.13	ENSG00000260409.1	0.147425	undirected	CYP3A5	RP11-403B2.7	lncRNA
ENSG00000106258.13	ENSG00000226800.5	0.147335	undirected	CYP3A5	CACTIN-AS1	lncRNA
ENSG00000106258.13	ENSG00000278954.1	0.147233	undirected	CYP3A5	RP13-415G19.2	lncRNA
ENSG00000106258.13	ENSG00000228812.7	0.147007	undirected	CYP3A5	LAMA5-AS1	lncRNA
ENSG00000106258.13	ENSG00000213888.3	0.146912	undirected	CYP3A5	LINC01521	lncRNA
ENSG00000106258.13	ENSG00000248356.1	0.14684	undirected	CYP3A5	RP11-557J10.4	lncRNA
ENSG00000106258.13	ENSG00000278769.1	0.146528	undirected	CYP3A5	CTD-2036P10.5	lncRNA
ENSG00000106258.13	ENSG00000122859.4	0.146432	undirected	CYP3A5	NEUROG3	humanTF
ENSG00000106258.13	ENSG00000278341.1	0.146317	undirected	CYP3A5	RP5-1142A6.10	lncRNA
ENSG00000106258.13	ENSG00000260259.1	0.146257	undirected	CYP3A5	LINC02166	lncRNA
ENSG00000106258.13	ENSG00000282012.1	0.146129	undirected	CYP3A5	LL22NC03-N95F10.1	lncRNA
ENSG00000106258.13	ENSG00000228008.1	0.145692	undirected	CYP3A5	CTD-2330K9.3	lncRNA
ENSG00000106258.13	ENSG00000268520.1	0.145685	undirected	CYP3A5	CTD-2616J11.10	lncRNA
ENSG00000106258.13	ENSG00000269825.1	0.145247	undirected	CYP3A5	CTD-3099C6.9	lncRNA
ENSG00000106258.13	ENSG00000102349.17	0.144965	undirected	CYP3A5	KLF8	humanTF
ENSG00000106258.13	ENSG00000132170.19	0.144732	undirected	CYP3A5	PPARG	humanTF
ENSG00000106258.13	ENSG00000100811.12	0.144273	undirected	CYP3A5	YY1	humanTF
ENSG00000106258.13	ENSG00000268912.1	0.144005	undirected	CYP3A5	CTD-2619J13.17	lncRNA
ENSG00000106258.13	ENSG00000071655.17	0.143724	undirected	CYP3A5	MBD3	humanTF
ENSG00000106258.13	ENSG00000260317.1	0.143663	undirected	CYP3A5	RP11-48B3.4	lncRNA
ENSG00000106258.13	ENSG00000189042.13	0.143179	undirected	CYP3A5	ZNF567	humanTF
ENSG00000106258.13	ENSG00000167232.13	0.142529	undirected	CYP3A5	ZNF91	humanTF
ENSG00000106258.13	ENSG00000265967.1	0.142492	undirected	CYP3A5	AC100830.4	lncRNA
ENSG00000106258.13	ENSG00000220161.4	0.142439	undirected	CYP3A5	LINC02076	lncRNA
ENSG00000106258.13	ENSG00000269473.1	0.142222	undirected	CYP3A5	CTD-2619J13.19	lncRNA
ENSG00000106258.13	ENSG00000278112.1	0.142057	undirected	CYP3A5	RP11-972P1.11	lncRNA
ENSG00000106258.13	ENSG00000197128.11	0.142006	undirected	CYP3A5	ZNF772	humanTF
ENSG00000106258.13	ENSG00000224376.1	0.141758	undirected	CYP3A5	AC017104.6	lncRNA
ENSG00000106258.13	ENSG00000267583.5	0.141655	undirected	CYP3A5	RP11-322E11.5	lncRNA
ENSG00000106258.13	ENSG00000278864.1	0.14151	undirected	CYP3A5	RP11-45M22.2	lncRNA
ENSG00000106258.13	ENSG00000171223.5	0.141377	undirected	CYP3A5	JUNB	humanTF
ENSG00000106258.13	ENSG00000188095.4	0.141296	undirected	CYP3A5	MESP2	humanTF
ENSG00000106258.13	ENSG00000267130.1	0.141269	undirected	CYP3A5	CTD-2540B15.9	lncRNA
ENSG00000106258.13	ENSG00000261490.1	0.140978	undirected	CYP3A5	RP11-448G15.3	lncRNA
ENSG00000106258.13	ENSG00000170949.17	0.140771	undirected	CYP3A5	ZNF160	humanTF
ENSG00000106258.13	ENSG00000266473.1	0.140467	undirected	CYP3A5	RP11-401F2.3	lncRNA
ENSG00000106258.13	ENSG00000198205.6	0.140454	undirected	CYP3A5	ZXDA	humanTF
ENSG00000106258.13	ENSG00000275111.4	0.140279	undirected	CYP3A5	ZNF2	humanTF
ENSG00000106258.13	ENSG00000260077.1	0.140236	undirected	CYP3A5	RP11-254F7.2	lncRNA
ENSG00000106258.13	ENSG00000261379.1	0.14009	undirected	CYP3A5	RP11-395N3.1	lncRNA
ENSG00000106258.13	ENSG00000189298.13	0.139848	undirected	CYP3A5	ZKSCAN3	humanTF
ENSG00000106258.13	ENSG00000272356.1	0.139727	undirected	CYP3A5	RP5-1112D6.8	lncRNA
ENSG00000106258.13	ENSG00000120798.16	0.139603	undirected	CYP3A5	NR2C1	humanTF
ENSG00000106258.13	ENSG00000234284.6	0.139551	undirected	CYP3A5	ZNF879	humanTF
ENSG00000106258.13	ENSG00000276846.1	0.139431	undirected	CYP3A5	CTD-3220F14.3	lncRNA
ENSG00000106258.13	ENSG00000251409.1	0.139043	undirected	CYP3A5	AC008592.4	lncRNA
ENSG00000106258.13	ENSG00000254004.6	0.138867	undirected	CYP3A5	ZNF260	humanTF
ENSG00000106258.13	ENSG00000280351.2	0.138756	undirected	CYP3A5	LOC100129503	lncRNA
ENSG00000106258.13	ENSG00000260810.1	0.138701	undirected	CYP3A5	CTD-2547L24.4	lncRNA
ENSG00000106258.13	ENSG00000279192.1	0.138691	undirected	CYP3A5	PWAR5	lncRNA
ENSG00000106258.13	ENSG00000267058.1	0.13829	undirected	CYP3A5	LOC100505715	lncRNA
ENSG00000106258.13	ENSG00000265399.1	0.138053	undirected	CYP3A5	RP13-270P17.2	lncRNA
ENSG00000106258.13	ENSG00000005073.5	0.137973	undirected	CYP3A5	HOXA11	humanTF
ENSG00000106258.13	ENSG00000272656.1	0.13788	undirected	CYP3A5	RP11-219D15.3	lncRNA
ENSG00000106258.13	ENSG00000178338.10	0.137844	undirected	CYP3A5	ZNF354B	humanTF
ENSG00000106258.13	ENSG00000261098.1	0.137835	undirected	CYP3A5	RP11-819C21.1	lncRNA
ENSG00000106258.13	ENSG00000260190.1	0.137721	undirected	CYP3A5	RP11-229P13.25	lncRNA
ENSG00000106258.13	ENSG00000253163.1	0.137623	undirected	CYP3A5	RP11-443C10.1	lncRNA
ENSG00000106258.13	ENSG00000225213.2	0.137363	undirected	CYP3A5	RP11-197M22.2	lncRNA
ENSG00000106258.13	ENSG00000230555.2	0.137203	undirected	CYP3A5	RP11-517P14.2	lncRNA
ENSG00000106258.13	ENSG00000269815.1	0.136972	undirected	CYP3A5	CTD-2278I10.4	lncRNA
ENSG00000106258.13	ENSG00000274001.1	0.136942	undirected	CYP3A5	RP11-5G9.5	lncRNA
ENSG00000106258.13	ENSG00000260293.2	0.136809	undirected	CYP3A5	RP11-715J22.6	lncRNA
ENSG00000106258.13	ENSG00000267758.1	0.136757	undirected	CYP3A5	RP11-358B23.5	lncRNA
ENSG00000106258.13	ENSG00000111269.2	0.136642	undirected	CYP3A5	CREBL2	humanTF
ENSG00000106258.13	ENSG00000280426.1	0.136466	undirected	CYP3A5	RP11-837J7.3	lncRNA
ENSG00000106258.13	ENSG00000229334.1	0.136272	undirected	CYP3A5	AC046143.3	lncRNA
ENSG00000106258.13	ENSG00000269952.1	0.136245	undirected	CYP3A5	RP11-324I22.3	lncRNA
ENSG00000106258.13	ENSG00000136997.16	0.136223	undirected	CYP3A5	MYC	humanTF
ENSG00000106258.13	ENSG00000280383.1	0.13579	undirected	CYP3A5	CTA-941F9.10	lncRNA
ENSG00000106258.13	ENSG00000198105.13	0.135725	undirected	CYP3A5	ZNF248	humanTF
ENSG00000106258.13	ENSG00000259005.1	0.135379	undirected	CYP3A5	RP3-449M8.6	lncRNA
ENSG00000106258.13	ENSG00000280128.1	0.135368	undirected	CYP3A5	XXbac-BPG283O16.9	lncRNA
ENSG00000106258.13	ENSG00000236051.7	0.135235	undirected	CYP3A5	MYCBP2-AS1	lncRNA
ENSG00000106258.13	ENSG00000236708.1	0.134966	undirected	CYP3A5	AC073316.1	lncRNA
ENSG00000106258.13	ENSG00000198546.14	0.134926	undirected	CYP3A5	ZNF511	humanTF
ENSG00000106258.13	ENSG00000184058.12	0.13455	undirected	CYP3A5	TBX1	humanTF
ENSG00000106258.13	ENSG00000248544.2	0.134475	undirected	CYP3A5	CTB-47B11.3	lncRNA
ENSG00000106258.13	ENSG00000176222.8	0.134395	undirected	CYP3A5	ZNF404	humanTF
ENSG00000106258.13	ENSG00000232803.1	0.134138	undirected	CYP3A5	SLCO4A1-AS1	lncRNA
ENSG00000106258.13	ENSG00000279631.1	0.134097	undirected	CYP3A5	RP11-573G6.4	lncRNA
ENSG00000106258.13	ENSG00000259933.6	0.13389	undirected	CYP3A5	LOC105371049	lncRNA
ENSG00000106258.13	ENSG00000269194.1	0.133791	undirected	CYP3A5	AC006942.4	lncRNA
ENSG00000106258.13	ENSG00000175832.12	0.133513	undirected	CYP3A5	ETV4	humanTF
ENSG00000106258.13	ENSG00000123685.8	0.133376	undirected	CYP3A5	BATF3	humanTF
ENSG00000106258.13	ENSG00000214029.4	0.133222	undirected	CYP3A5	ZNF891	humanTF
ENSG00000106258.13	ENSG00000263731.1	0.132971	undirected	CYP3A5	RP11-498C9.15	lncRNA
ENSG00000106258.13	ENSG00000224888.4	0.132548	undirected	CYP3A5	RP5-1142A6.2	lncRNA
ENSG00000106258.13	ENSG00000198429.9	0.132493	undirected	CYP3A5	ZNF69	humanTF
ENSG00000106258.13	ENSG00000279196.1	0.132431	undirected	CYP3A5	RP11-1072A3.3	lncRNA
ENSG00000106258.13	ENSG00000258441.1	0.132349	undirected	CYP3A5	LINC00641	lncRNA
ENSG00000106258.13	ENSG00000244239.1	0.132195	undirected	CYP3A5	AC007009.1	lncRNA
ENSG00000106258.13	ENSG00000272872.1	0.131892	undirected	CYP3A5	LL22NC03-N14H11.1	lncRNA
ENSG00000106258.13	ENSG00000225938.1	0.131867	undirected	CYP3A5	RP4-575N6.4	lncRNA
ENSG00000106258.13	ENSG00000235072.2	0.131771	undirected	CYP3A5	AC012074.2	lncRNA
ENSG00000106258.13	ENSG00000169057.21	0.131731	undirected	CYP3A5	MECP2	humanTF
ENSG00000106258.13	ENSG00000232640.1	0.13135	undirected	CYP3A5	RP1-266L20.2	lncRNA
ENSG00000106258.13	ENSG00000263001.5	0.131256	undirected	CYP3A5	GTF2I	humanTF
ENSG00000106258.13	ENSG00000158691.14	0.13117	undirected	CYP3A5	ZSCAN12	humanTF
ENSG00000106258.13	ENSG00000270659.1	0.131063	undirected	CYP3A5	RP11-105N14.1	lncRNA
ENSG00000106258.13	ENSG00000178248.11	0.131032	undirected	CYP3A5	FAM230I	lncRNA
ENSG00000106258.13	ENSG00000232104.3	0.130856	undirected	CYP3A5	RFX3-AS1	lncRNA
ENSG00000106258.13	ENSG00000274976.1	0.130809	undirected	CYP3A5	RP11-8P13.5	lncRNA
ENSG00000106258.13	ENSG00000179743.4	0.130676	undirected	CYP3A5	FLJ37453	lncRNA
ENSG00000106258.13	ENSG00000267737.1	0.130614	undirected	CYP3A5	AC061992.2	lncRNA
ENSG00000106258.13	ENSG00000127081.13	0.130424	undirected	CYP3A5	ZNF484	humanTF
ENSG00000106258.13	ENSG00000218357.3	0.130265	undirected	CYP3A5	LINC01644	lncRNA
ENSG00000106258.13	ENSG00000268047.1	0.130147	undirected	CYP3A5	AC018766.6	lncRNA
ENSG00000106258.13	ENSG00000274312.1	0.130051	undirected	CYP3A5	RP11-167B3.2	lncRNA
ENSG00000106258.13	ENSG00000283141.1	0.129539	undirected	CYP3A5	RP11-109A6.5	lncRNA
ENSG00000106258.13	ENSG00000270108.1	0.12895	undirected	CYP3A5	RP11-73M18.6	lncRNA
ENSG00000106258.13	ENSG00000249258.2	0.128844	undirected	CYP3A5	RP11-468H14.2	lncRNA
ENSG00000106258.13	ENSG00000272235.1	0.128476	undirected	CYP3A5	RP11-22L13.1	lncRNA
ENSG00000106258.13	ENSG00000279948.1	0.128452	undirected	CYP3A5	CTD-2233K9.1	lncRNA
ENSG00000106258.13	ENSG00000117000.8	0.128387	undirected	CYP3A5	RLF	humanTF
ENSG00000106258.13	ENSG00000181472.4	0.127942	undirected	CYP3A5	ZBTB2	humanTF
ENSG00000106258.13	ENSG00000130684.13	0.127514	undirected	CYP3A5	ZNF337	humanTF
ENSG00000106258.13	ENSG00000213015.8	0.127423	undirected	CYP3A5	ZNF580	humanTF
ENSG00000106258.13	ENSG00000198740.8	0.127058	undirected	CYP3A5	ZNF652	humanTF
ENSG00000106258.13	ENSG00000262098.1	0.126807	undirected	CYP3A5	CTD-2561B21.10	lncRNA
ENSG00000106258.13	ENSG00000259314.1	0.126653	undirected	CYP3A5	CTD-3065B20.3	lncRNA
ENSG00000106258.13	ENSG00000196646.11	0.126441	undirected	CYP3A5	ZNF136	humanTF
ENSG00000106258.13	ENSG00000237797.1	0.126177	undirected	CYP3A5	RP11-472N13.3	lncRNA
ENSG00000106258.13	ENSG00000261441.1	0.126015	undirected	CYP3A5	RP11-217B1.2	lncRNA
ENSG00000106258.13	ENSG00000143458.11	0.125892	undirected	CYP3A5	GABPB2	humanTF
ENSG00000106258.13	ENSG00000266677.1	0.125061	undirected	CYP3A5	RP11-258F1.1	lncRNA
ENSG00000106258.13	ENSG00000226363.3	0.12476	undirected	CYP3A5	HAGLROS	lncRNA
ENSG00000106258.13	ENSG00000254162.1	0.124564	undirected	CYP3A5	RP11-48B3.3	lncRNA
ENSG00000106258.13	ENSG00000138375.12	0.123991	undirected	CYP3A5	SMARCAL1	humanTF
ENSG00000106258.13	ENSG00000279762.3	0.123928	undirected	CYP3A5	RP11-227G15.12	lncRNA
ENSG00000106258.13	ENSG00000178734.5	0.123122	undirected	CYP3A5	LMO7DN	lncRNA
ENSG00000106258.13	ENSG00000281831.1	0.122946	undirected	CYP3A5	HCP5B	lncRNA
ENSG00000106258.13	ENSG00000197024.8	0.122505	undirected	CYP3A5	ZNF398	humanTF
ENSG00000106258.13	ENSG00000196387.9	0.1224	undirected	CYP3A5	ZNF140	humanTF
ENSG00000106258.13	ENSG00000278816.1	0.122162	undirected	CYP3A5	RP5-1116H23.4	lncRNA
ENSG00000106258.13	ENSG00000167785.8	0.12213	undirected	CYP3A5	ZNF558	humanTF
ENSG00000106258.13	ENSG00000159140.19	0.121506	undirected	CYP3A5	SON	humanTF
ENSG00000106258.13	ENSG00000263466.1	0.121228	undirected	CYP3A5	RP1-56K13.2	lncRNA
ENSG00000106258.13	ENSG00000144485.10	0.121117	undirected	CYP3A5	HES6	humanTF
ENSG00000106258.13	ENSG00000273289.1	0.120973	undirected	CYP3A5	RP6-109B7.5	lncRNA
ENSG00000106258.13	ENSG00000267100.1	0.120874	undirected	CYP3A5	ILF3-DT	lncRNA
ENSG00000106258.13	ENSG00000279166.1	0.120865	undirected	CYP3A5	RP11-107E5.3	lncRNA
ENSG00000106258.13	ENSG00000167555.13	0.120634	undirected	CYP3A5	ZNF528	humanTF
ENSG00000106258.13	ENSG00000152439.12	0.120588	undirected	CYP3A5	ZNF773	humanTF
ENSG00000106258.13	ENSG00000271966.1	0.120537	undirected	CYP3A5	RP11-7F18.2	lncRNA
ENSG00000106258.13	ENSG00000176236.6	0.120479	undirected	CYP3A5	RPP38-DT	lncRNA
ENSG00000106258.13	ENSG00000273151.1	0.120335	undirected	CYP3A5	RP11-449P15.2	lncRNA
ENSG00000106258.13	ENSG00000274213.1	0.120106	undirected	CYP3A5	RP11-670E13.6	lncRNA
ENSG00000106258.13	ENSG00000273287.2	0.119621	undirected	CYP3A5	CTA-268H5.14	lncRNA
ENSG00000106258.13	ENSG00000279140.1	0.119597	undirected	CYP3A5	RP11-477I4.4	lncRNA
ENSG00000106258.13	ENSG00000279699.1	0.119145	undirected	CYP3A5	RP1-102K2.9	lncRNA
ENSG00000106258.13	ENSG00000158055.15	0.118904	undirected	CYP3A5	GRHL3	humanTF
ENSG00000106258.13	ENSG00000181450.17	0.117937	undirected	CYP3A5	ZNF678	humanTF
ENSG00000106258.13	ENSG00000257446.3	0.117707	undirected	CYP3A5	ZNF878	humanTF
ENSG00000106258.13	ENSG00000135457.9	0.117473	undirected	CYP3A5	TFCP2	humanTF
ENSG00000106258.13	ENSG00000174197.16	0.116744	undirected	CYP3A5	MGA	humanTF
ENSG00000106258.13	ENSG00000267649.1	0.116541	undirected	CYP3A5	CTD-2587H24.10	lncRNA
ENSG00000106258.13	ENSG00000265194.1	0.116521	undirected	CYP3A5	RP11-70L8.4	lncRNA
ENSG00000106258.13	ENSG00000267072.2	0.116414	undirected	CYP3A5	NAGPA-AS1	lncRNA
ENSG00000106258.13	ENSG00000255737.2	0.116203	undirected	CYP3A5	AGAP2-AS1	lncRNA
ENSG00000106258.13	ENSG00000275457.1	0.115903	undirected	CYP3A5	RP1-198K11.5	lncRNA
ENSG00000106258.13	ENSG00000276980.1	0.115862	undirected	CYP3A5	CTD-3128G10.7	lncRNA
ENSG00000106258.13	ENSG00000075407.18	0.115766	undirected	CYP3A5	ZNF37A	humanTF
ENSG00000106258.13	ENSG00000260160.1	0.115664	undirected	CYP3A5	CTC-471J1.2	lncRNA
ENSG00000106258.13	ENSG00000272909.1	0.115423	undirected	CYP3A5	CTD-2555O16.4	lncRNA
ENSG00000106258.13	ENSG00000260473.2	0.115209	undirected	CYP3A5	RP11-923I11.4	lncRNA
ENSG00000106258.13	ENSG00000272541.1	0.115187	undirected	CYP3A5	XXbac-BPGBPG55C20.1	lncRNA
ENSG00000106258.13	ENSG00000276649.1	0.115173	undirected	CYP3A5	RP5-858L17.1	lncRNA
ENSG00000106258.13	ENSG00000283445.1	0.115042	undirected	CYP3A5	RP11-63G10.4	lncRNA
ENSG00000106258.13	ENSG00000280424.1	0.114557	undirected	CYP3A5	LOC730668	lncRNA
ENSG00000106258.13	ENSG00000279204.1	0.114325	undirected	CYP3A5	RP11-175K6.2	lncRNA
ENSG00000106258.13	ENSG00000279568.1	0.113984	undirected	CYP3A5	RP11-20I23.5	lncRNA
ENSG00000106258.13	ENSG00000182979.17	0.113493	undirected	CYP3A5	MTA1	humanTF
ENSG00000106258.13	ENSG00000153560.11	0.11304	undirected	CYP3A5	UBP1	humanTF
ENSG00000106258.13	ENSG00000267834.1	0.112444	undirected	CYP3A5	RP11-167N5.5	lncRNA
ENSG00000106258.13	ENSG00000163666.8	0.112191	undirected	CYP3A5	HESX1	humanTF
ENSG00000106258.13	ENSG00000230612.3	0.112187	undirected	CYP3A5	AC004237.1	lncRNA
ENSG00000106258.13	ENSG00000260740.2	0.111621	undirected	CYP3A5	AC026471.6	lncRNA
ENSG00000106258.13	ENSG00000271889.1	0.111431	undirected	CYP3A5	LOC105374758	lncRNA
ENSG00000106258.13	ENSG00000277142.1	0.111365	undirected	CYP3A5	LINC00235	lncRNA
ENSG00000106258.13	ENSG00000250686.2	0.111335	undirected	CYP3A5	RP1-240B8.3	lncRNA
ENSG00000106258.13	ENSG00000259994.1	0.111075	undirected	CYP3A5	RP11-305E6.4	lncRNA
ENSG00000106258.13	ENSG00000223776.5	0.110832	undirected	CYP3A5	LGALS8-AS1	lncRNA
ENSG00000106258.13	ENSG00000266490.1	0.110779	undirected	CYP3A5	CTD-2349P21.9	lncRNA
ENSG00000106258.13	ENSG00000127124.14	0.109972	undirected	CYP3A5	HIVEP3	humanTF
ENSG00000106258.13	ENSG00000270933.1	0.109871	undirected	CYP3A5	CTD-2227E11.1	lncRNA
ENSG00000106258.13	ENSG00000268713.1	0.109489	undirected	CYP3A5	CTC-444N24.8	lncRNA
ENSG00000106258.13	ENSG00000130856.15	0.108904	undirected	CYP3A5	ZNF236	humanTF
ENSG00000106258.13	ENSG00000205041.1	0.108627	undirected	CYP3A5	CTC-425O23.2	lncRNA
ENSG00000106258.13	ENSG00000197566.9	0.10858	undirected	CYP3A5	ZNF624	humanTF
ENSG00000106258.13	ENSG00000078043.15	0.108563	undirected	CYP3A5	PIAS2	humanTF
ENSG00000106258.13	ENSG00000260257.2	0.108379	undirected	CYP3A5	RP5-1085F17.3	lncRNA
ENSG00000106258.13	ENSG00000159885.13	0.108355	undirected	CYP3A5	ZNF222	humanTF
ENSG00000106258.13	ENSG00000272760.1	0.108317	undirected	CYP3A5	RP11-5C23.1	lncRNA
ENSG00000106258.13	ENSG00000279656.1	0.108137	undirected	CYP3A5	RP11-298I3.6	lncRNA
ENSG00000106258.13	ENSG00000270011.6	0.107831	undirected	CYP3A5	ZNF559-ZNF177	humanTF
ENSG00000106258.13	ENSG00000263345.1	0.107737	undirected	CYP3A5	RP1-59D14.5	lncRNA
ENSG00000106258.13	ENSG00000261737.1	0.107646	undirected	CYP3A5	CLCA4-AS1	lncRNA
ENSG00000106258.13	ENSG00000271918.1	0.107325	undirected	CYP3A5	CTD-2287O16.5	lncRNA
ENSG00000106258.13	ENSG00000167766.18	0.106753	undirected	CYP3A5	ZNF83	humanTF
ENSG00000106258.13	ENSG00000181315.10	0.106542	undirected	CYP3A5	ZNF322	humanTF
ENSG00000106258.13	ENSG00000188283.11	0.106111	undirected	CYP3A5	ZNF383	humanTF
ENSG00000106258.13	ENSG00000268678.1	0.105877	undirected	CYP3A5	CTC-444N24.13	lncRNA
ENSG00000106258.13	ENSG00000275964.1	0.105596	undirected	CYP3A5	RP11-61K9.3	lncRNA
ENSG00000106258.13	ENSG00000272316.1	0.105266	undirected	CYP3A5	XXbac-BPGBPG55C20.2	lncRNA
ENSG00000106258.13	ENSG00000272977.1	0.105065	undirected	CYP3A5	CTA-390C10.10	lncRNA
ENSG00000106258.13	ENSG00000237481.1	0.105016	undirected	CYP3A5	RP4-803J11.2	lncRNA
ENSG00000106258.13	ENSG00000246145.1	0.104586	undirected	CYP3A5	RRS1-AS1	lncRNA
ENSG00000106258.13	ENSG00000281538.1	0.104319	undirected	CYP3A5	RP4-669P10.20	lncRNA
ENSG00000106258.13	ENSG00000243795.1	0.103182	undirected	CYP3A5	LINC02044	lncRNA
ENSG00000106258.13	ENSG00000267198.1	0.103111	undirected	CYP3A5	RP11-798G7.6	lncRNA
ENSG00000106258.13	ENSG00000168062.9	0.102881	undirected	CYP3A5	BATF2	humanTF
ENSG00000106258.13	ENSG00000273374.1	0.102544	undirected	CYP3A5	RP11-383I23.2	lncRNA
ENSG00000106258.13	ENSG00000251661.3	0.102484	undirected	CYP3A5	RP11-326C3.11	lncRNA
ENSG00000106258.13	ENSG00000234203.1	0.102434	undirected	CYP3A5	RP5-1050D4.2	lncRNA
ENSG00000106258.13	ENSG00000169136.10	0.102381	undirected	CYP3A5	ATF5	humanTF
ENSG00000106258.13	ENSG00000260439.1	0.102211	undirected	CYP3A5	LMF1-AS1	lncRNA
ENSG00000106258.13	ENSG00000246627.6	0.10219	undirected	CYP3A5	CACNA1C-AS1	lncRNA
ENSG00000106258.13	ENSG00000236031.1	0.101862	undirected	CYP3A5	RP11-269F20.1	lncRNA
ENSG00000106258.13	ENSG00000228763.1	0.101848	undirected	CYP3A5	LIMS1-AS1	lncRNA
ENSG00000106258.13	ENSG00000083844.10	0.101192	undirected	CYP3A5	ZNF264	humanTF
ENSG00000106258.13	ENSG00000142528.15	0.101163	undirected	CYP3A5	ZNF473	humanTF
ENSG00000106258.13	ENSG00000174738.12	0.100829	undirected	CYP3A5	NR1D2	humanTF
ENSG00000106258.13	ENSG00000030419.16	0.100619	undirected	CYP3A5	IKZF2	humanTF
ENSG00000106258.13	ENSG00000263766.5	0.100601	undirected	CYP3A5	RP11-580I16.2	lncRNA
ENSG00000106258.13	ENSG00000258317.1	0.100187	undirected	CYP3A5	RP11-603J24.5	lncRNA
ENSG00000106258.13	ENSG00000273419.1	0.099868	undirected	CYP3A5	RP4-751H13.7	lncRNA
ENSG00000106258.13	ENSG00000152433.14	0.0997399	undirected	CYP3A5	ZNF547	humanTF
ENSG00000106258.13	ENSG00000274678.1	0.0992317	undirected	CYP3A5	RP11-2C24.7	lncRNA
ENSG00000106258.13	ENSG00000122548.5	0.098962	undirected	CYP3A5	KIAA0087	lncRNA
ENSG00000106258.13	ENSG00000277462.1	0.0988553	undirected	CYP3A5	ZNF670	humanTF
ENSG00000106258.13	ENSG00000226088.1	0.0985485	undirected	CYP3A5	RP11-180O5.2	lncRNA
ENSG00000106258.13	ENSG00000178150.9	0.0983119	undirected	CYP3A5	ZNF114	humanTF
ENSG00000106258.13	ENSG00000280231.1	0.098148	undirected	CYP3A5	LA16c-380F5.3	lncRNA
ENSG00000106258.13	ENSG00000253854.1	0.0980578	undirected	CYP3A5	RP11-10N23.2	lncRNA
ENSG00000106258.13	ENSG00000261221.3	0.0978963	undirected	CYP3A5	ZNF865	humanTF
ENSG00000106258.13	ENSG00000280269.1	0.0975905	undirected	CYP3A5	AP000577.2	lncRNA
ENSG00000106258.13	ENSG00000272564.1	0.0974217	undirected	CYP3A5	RP11-548P2.2	lncRNA
ENSG00000106258.13	ENSG00000249602.1	0.0974122	undirected	CYP3A5	RP11-98D18.3	lncRNA
ENSG00000106258.13	ENSG00000278276.1	0.0969111	undirected	CYP3A5	RP3-324O17.8	lncRNA
ENSG00000106258.13	ENSG00000262979.1	0.0968004	undirected	CYP3A5	CTD-2047H16.2	lncRNA
ENSG00000106258.13	ENSG00000276054.1	0.0963122	undirected	CYP3A5	RP11-378E13.3	lncRNA
ENSG00000106258.13	ENSG00000100219.16	0.0959488	undirected	CYP3A5	XBP1	humanTF
ENSG00000106258.13	ENSG00000260465.1	0.095922	undirected	CYP3A5	RP11-63M22.2	lncRNA
ENSG00000106258.13	ENSG00000198715.11	0.0958421	undirected	CYP3A5	GLMP	humanTF
ENSG00000106258.13	ENSG00000177683.13	0.0952319	undirected	CYP3A5	THAP5	humanTF
ENSG00000106258.13	ENSG00000182352.8	0.0947731	undirected	CYP3A5	C17orf77	lncRNA
ENSG00000106258.13	ENSG00000238287.1	0.0947621	undirected	CYP3A5	RP11-656D10.3	lncRNA
ENSG00000106258.13	ENSG00000197714.8	0.0947366	undirected	CYP3A5	ZNF460	humanTF
ENSG00000106258.13	ENSG00000260461.1	0.0944542	undirected	CYP3A5	RP11-541N10.3	lncRNA
ENSG00000106258.13	ENSG00000279722.1	0.0944444	undirected	CYP3A5	RP11-44F14.6	lncRNA
ENSG00000106258.13	ENSG00000203280.4	0.0943989	undirected	CYP3A5	KIAA1671-AS1	lncRNA
ENSG00000106258.13	ENSG00000272077.1	0.0942576	undirected	CYP3A5	RP11-348P10.2	lncRNA
ENSG00000106258.13	ENSG00000278952.1	0.0935318	undirected	CYP3A5	RP11-399J13.2	lncRNA
ENSG00000106258.13	ENSG00000273893.1	0.0935287	undirected	CYP3A5	RP1-101A2.1	lncRNA
ENSG00000106258.13	ENSG00000197841.14	0.0935238	undirected	CYP3A5	ZNF181	humanTF
ENSG00000106258.13	ENSG00000270000.1	0.0932845	undirected	CYP3A5	RP3-449M8.9	lncRNA
ENSG00000106258.13	ENSG00000273091.1	0.0928839	undirected	CYP3A5	AP000255.6	lncRNA
ENSG00000106258.13	ENSG00000134323.11	0.0924185	undirected	CYP3A5	MYCN	humanTF
ENSG00000106258.13	ENSG00000279433.1	0.0922562	undirected	CYP3A5	RP11-4B16.1	lncRNA
ENSG00000106258.13	ENSG00000279690.1	0.0921069	undirected	CYP3A5	AP000280.66	lncRNA
ENSG00000106258.13	ENSG00000275576.1	0.0910235	undirected	CYP3A5	RP5-836N17.4	lncRNA
ENSG00000106258.13	ENSG00000132604.10	0.0906102	undirected	CYP3A5	TERF2	humanTF
ENSG00000106258.13	ENSG00000255384.1	0.0905964	undirected	CYP3A5	RP11-770J1.4	lncRNA
ENSG00000106258.13	ENSG00000236154.1	0.0905606	undirected	CYP3A5	RP11-343J3.2	lncRNA
ENSG00000106258.13	ENSG00000273219.1	0.0905021	undirected	CYP3A5	RP11-644N4.1	lncRNA
ENSG00000106258.13	ENSG00000143178.12	0.0897972	undirected	CYP3A5	TBX19	humanTF
ENSG00000106258.13	ENSG00000235078.1	0.0889462	undirected	CYP3A5	AC142528.1	lncRNA
ENSG00000106258.13	ENSG00000230424.1	0.0886327	undirected	CYP3A5	EMC1-AS1	lncRNA
ENSG00000106258.13	ENSG00000185668.7	0.0886066	undirected	CYP3A5	POU3F1	humanTF
ENSG00000106258.13	ENSG00000260743.1	0.0885478	undirected	CYP3A5	RP11-255C15.3	lncRNA
ENSG00000106258.13	ENSG00000183850.13	0.0884704	undirected	CYP3A5	ZNF730	humanTF
ENSG00000106258.13	ENSG00000280374.1	0.088416	undirected	CYP3A5	RP11-337N6.3	lncRNA
ENSG00000106258.13	ENSG00000069667.15	0.0884107	undirected	CYP3A5	RORA	humanTF
ENSG00000106258.13	ENSG00000235314.1	0.0882689	undirected	CYP3A5	LINC00957	lncRNA
ENSG00000106258.13	ENSG00000243389.1	0.0881875	undirected	CYP3A5	AC012442.5	lncRNA
ENSG00000106258.13	ENSG00000271851.1	0.0881445	undirected	CYP3A5	RP11-565F19.2	lncRNA
ENSG00000106258.13	ENSG00000273264.1	0.0880895	undirected	CYP3A5	RP11-131L23.2	lncRNA
ENSG00000106258.13	ENSG00000270147.1	0.0879469	undirected	CYP3A5	RP11-646I6.6	lncRNA
ENSG00000106258.13	ENSG00000253921.1	0.0875969	undirected	CYP3A5	CTB-113P19.3	lncRNA
ENSG00000106258.13	ENSG00000196267.12	0.0874695	undirected	CYP3A5	ZNF836	humanTF
ENSG00000106258.13	ENSG00000279641.1	0.0872661	undirected	CYP3A5	CTD-2545G14.6	lncRNA
ENSG00000106258.13	ENSG00000277007.1	0.087255	undirected	CYP3A5	RP11-392O17.2	lncRNA
ENSG00000106258.13	ENSG00000205786.8	0.0856222	undirected	CYP3A5	LINC01531	lncRNA
ENSG00000106258.13	ENSG00000271871.1	0.085587	undirected	CYP3A5	AC005740.6	lncRNA
ENSG00000106258.13	ENSG00000279499.1	0.0855717	undirected	CYP3A5	RP11-490N5.3	lncRNA
ENSG00000106258.13	ENSG00000197808.11	0.0852753	undirected	CYP3A5	ZNF461	humanTF
ENSG00000106258.13	ENSG00000256250.1	0.0845923	undirected	CYP3A5	RP11-989F5.1	lncRNA
ENSG00000106258.13	ENSG00000277130.1	0.0841367	undirected	CYP3A5	RP11-530C5.4	lncRNA
ENSG00000106258.13	ENSG00000249180.1	0.0840089	undirected	CYP3A5	CTC-506B8.1	lncRNA
ENSG00000106258.13	ENSG00000279342.2	0.0839102	undirected	CYP3A5	RP11-677M14.8	lncRNA
ENSG00000106258.13	ENSG00000263120.1	0.0838908	undirected	CYP3A5	RP5-1107A17.4	lncRNA
ENSG00000106258.13	ENSG00000154727.10	0.083665	undirected	CYP3A5	GABPA	humanTF
ENSG00000106258.13	ENSG00000224536.2	0.0829815	undirected	CYP3A5	LOC107985246	lncRNA
ENSG00000106258.13	ENSG00000167840.13	0.0827526	undirected	CYP3A5	ZNF232	humanTF
ENSG00000106258.13	ENSG00000167528.12	0.0827303	undirected	CYP3A5	ZNF641	humanTF
ENSG00000106258.13	ENSG00000276259.1	0.0826947	undirected	CYP3A5	RP11-481J2.4	lncRNA
ENSG00000106258.13	ENSG00000275484.1	0.0820009	undirected	CYP3A5	CTC-1337H24.4	lncRNA
ENSG00000106258.13	ENSG00000266456.1	0.0819971	undirected	CYP3A5	RP11-806L2.2	lncRNA
ENSG00000106258.13	ENSG00000273521.1	0.0819148	undirected	CYP3A5	RP11-45A17.4	lncRNA
ENSG00000106258.13	ENSG00000144026.11	0.0817827	undirected	CYP3A5	ZNF514	humanTF
ENSG00000106258.13	ENSG00000166860.2	0.081335	undirected	CYP3A5	ZBTB39	humanTF
ENSG00000106258.13	ENSG00000245680.9	0.0803766	undirected	CYP3A5	ZNF585B	humanTF
ENSG00000106258.13	ENSG00000225951.1	0.0803335	undirected	CYP3A5	ODF2-AS1	lncRNA
ENSG00000106258.13	ENSG00000267510.1	0.0790507	undirected	CYP3A5	CTC-325H20.4	lncRNA
ENSG00000106258.13	ENSG00000275371.1	0.0788256	undirected	CYP3A5	RP11-455F5.6	lncRNA
ENSG00000106258.13	ENSG00000276071.1	0.0784729	undirected	CYP3A5	CTD-3234P18.6	lncRNA
ENSG00000106258.13	ENSG00000168661.14	0.0781393	undirected	CYP3A5	ZNF30	humanTF
ENSG00000106258.13	ENSG00000259943.1	0.0780783	undirected	CYP3A5	RP1-39G22.7	lncRNA
ENSG00000106258.13	ENSG00000279106.1	0.0775235	undirected	CYP3A5	RP11-426C22.1	lncRNA
ENSG00000106258.13	ENSG00000280149.1	0.0774148	undirected	CYP3A5	RP4-751H13.5	lncRNA
ENSG00000106258.13	ENSG00000245667.2	0.0771103	undirected	CYP3A5	RP5-940J5.8	lncRNA
ENSG00000106258.13	ENSG00000152454.3	0.0765859	undirected	CYP3A5	ZNF256	humanTF
ENSG00000106258.13	ENSG00000234222.6	0.0757843	undirected	CYP3A5	LIX1L-AS1	lncRNA
ENSG00000106258.13	ENSG00000101883.4	0.0749448	undirected	CYP3A5	RHOXF1	humanTF
ENSG00000106258.13	ENSG00000273973.1	0.0744971	undirected	CYP3A5	RP11-973D8.5	lncRNA
ENSG00000106258.13	ENSG00000280355.1	0.0742985	undirected	CYP3A5	RP11-119F19.5	lncRNA
ENSG00000106258.13	ENSG00000259081.1	0.0738629	undirected	CYP3A5	RP11-488C13.6	lncRNA
ENSG00000106258.13	ENSG00000254288.1	0.0734281	undirected	CYP3A5	RP11-6I2.3	lncRNA
ENSG00000106258.13	ENSG00000251259.1	0.0734128	undirected	CYP3A5	AC004069.2	lncRNA
ENSG00000106258.13	ENSG00000226669.2	0.0725067	undirected	CYP3A5	RP11-509J21.4	lncRNA
ENSG00000106258.13	ENSG00000229539.1	0.0722154	undirected	CYP3A5	RP11-119B16.2	lncRNA
ENSG00000106258.13	ENSG00000204611.6	0.0721911	undirected	CYP3A5	ZNF616	humanTF
ENSG00000106258.13	ENSG00000170325.14	0.0717763	undirected	CYP3A5	PRDM10	humanTF
ENSG00000106258.13	ENSG00000277232.2	0.0716543	undirected	CYP3A5	GTSE1-DT	lncRNA
ENSG00000106258.13	ENSG00000267672.1	0.071327	undirected	CYP3A5	CTD-2293H3.1	lncRNA
ENSG00000106258.13	ENSG00000259826.1	0.0703205	undirected	CYP3A5	LOC112267983	lncRNA
ENSG00000106258.13	ENSG00000258199.1	0.0679008	undirected	CYP3A5	RP11-977G19.5	lncRNA
ENSG00000106258.13	ENSG00000237429.1	0.0677178	undirected	CYP3A5	RP1-159A19.4	lncRNA
ENSG00000106258.13	ENSG00000261186.2	0.0675639	undirected	CYP3A5	LINC01238	lncRNA
ENSG00000106258.13	ENSG00000257740.1	0.0663837	undirected	CYP3A5	RP11-977G19.12	lncRNA
ENSG00000106258.13	ENSG00000266289.1	0.0650131	undirected	CYP3A5	RP11-1C8.6	lncRNA
ENSG00000106258.13	ENSG00000267390.1	0.0644551	undirected	CYP3A5	RP11-635N19.1	lncRNA
ENSG00000106258.13	ENSG00000277566.1	0.063922	undirected	CYP3A5	RP11-545P7.9	lncRNA
ENSG00000106258.13	ENSG00000188295.14	0.0637584	undirected	CYP3A5	ZNF669	humanTF
ENSG00000106258.13	ENSG00000257279.1	0.0636767	undirected	CYP3A5	LOC100506551	lncRNA
ENSG00000106258.13	ENSG00000254094.1	0.0635494	undirected	CYP3A5	AC078852.1	lncRNA
ENSG00000106258.13	ENSG00000278456.1	0.0619521	undirected	CYP3A5	RP11-66B24.9	lncRNA
ENSG00000106258.13	ENSG00000273139.1	0.0618668	undirected	CYP3A5	XXbac-B444P24.14	lncRNA
ENSG00000106258.13	ENSG00000259649.4	0.0618539	undirected	CYP3A5	RP11-351M8.1	lncRNA
ENSG00000106258.13	ENSG00000233926.1	0.0616186	undirected	CYP3A5	LOC101927502	lncRNA
ENSG00000106258.13	ENSG00000242686.4	0.0602636	undirected	CYP3A5	PDE6B-AS1	lncRNA
ENSG00000106258.13	ENSG00000275764.1	0.0588234	undirected	CYP3A5	RP11-582E3.6	lncRNA
ENSG00000106258.13	ENSG00000171161.12	0.0584014	undirected	CYP3A5	ZNF672	humanTF
ENSG00000106258.13	ENSG00000170448.11	0.057749	undirected	CYP3A5	NFXL1	humanTF
ENSG00000106258.13	ENSG00000274987.1	0.0574979	undirected	CYP3A5	RP11-295I5.3	lncRNA
ENSG00000106258.13	ENSG00000131848.9	0.0573921	undirected	CYP3A5	ZSCAN5A	humanTF
ENSG00000106258.13	ENSG00000272040.1	0.0571511	undirected	CYP3A5	CTC-366B18.4	lncRNA
ENSG00000106258.13	ENSG00000254842.6	0.0565196	undirected	CYP3A5	RP11-890B15.2	lncRNA
ENSG00000106258.13	ENSG00000156030.13	0.0560901	undirected	CYP3A5	MIDEAS	humanTF
ENSG00000106258.13	ENSG00000227848.1	0.0559403	undirected	CYP3A5	SUCLA2-AS1	lncRNA
ENSG00000106258.13	ENSG00000275383.1	0.0546656	undirected	CYP3A5	RP11-615I2.6	lncRNA
ENSG00000106258.13	ENSG00000278383.1	0.0543876	undirected	CYP3A5	RP4-694B14.8	lncRNA
ENSG00000106258.13	ENSG00000271967.1	0.0524368	undirected	CYP3A5	RP11-134K13.4	lncRNA
ENSG00000106258.13	ENSG00000260708.1	0.0517057	undirected	CYP3A5	CTA-29F11.1	lncRNA
ENSG00000106258.13	ENSG00000231081.1	0.0514576	undirected	CYP3A5	RP4-760C5.3	lncRNA
ENSG00000106258.13	ENSG00000272156.1	0.0503021	undirected	CYP3A5	RP11-477N3.1	lncRNA

## Sheet: f-SI_red_CYP3A7
Table S1-6: The TFs, lncRNAs, and miRNAs co-expressed with CYP3A7 in red module in the second group.
From Node	To Node	Weight	direction	From Name	To Name	Type
ENSG00000160870.12	ENSG00000260401.1	0.235235	undirected	CYP3A7	RP11-800A3.4	lncRNA
ENSG00000160870.12	ENSG00000256802.2	0.232597	undirected	CYP3A7	LOC100130111	lncRNA
ENSG00000160870.12	ENSG00000148200.16	0.231771	undirected	CYP3A7	NR6A1	humanTF
ENSG00000160870.12	ENSG00000171970.12	0.22542	undirected	CYP3A7	ZNF57	humanTF
ENSG00000160870.12	ENSG00000250497.1	0.224984	undirected	CYP3A7	AC007126.1	lncRNA
ENSG00000160870.12	ENSG00000247699.2	0.222682	undirected	CYP3A7	CTB-127C13.1	lncRNA
ENSG00000160870.12	ENSG00000110693.17	0.222379	undirected	CYP3A7	SOX6	humanTF
ENSG00000160870.12	ENSG00000224057.1	0.213787	undirected	CYP3A7	EGFR-AS1	lncRNA
ENSG00000160870.12	ENSG00000255478.1	0.211619	undirected	CYP3A7	RP11-867O8.5	lncRNA
ENSG00000160870.12	ENSG00000224417.2	0.209257	undirected	CYP3A7	RP11-503C24.6	lncRNA
ENSG00000160870.12	ENSG00000227959.1	0.205537	undirected	CYP3A7	RP11-276H7.2	lncRNA
ENSG00000160870.12	ENSG00000236384.7	0.203382	undirected	CYP3A7	LINC00479	lncRNA
ENSG00000160870.12	ENSG00000186951.16	0.19892	undirected	CYP3A7	PPARA	humanTF
ENSG00000160870.12	ENSG00000153879.8	0.185229	undirected	CYP3A7	CEBPG	humanTF
ENSG00000160870.12	ENSG00000244137.1	0.184888	undirected	CYP3A7	RP11-99J16__A.2	lncRNA
ENSG00000160870.12	ENSG00000224621.1	0.180678	undirected	CYP3A7	RP11-276H7.3	lncRNA
ENSG00000160870.12	ENSG00000225680.1	0.173969	undirected	CYP3A7	AL163953.2	lncRNA
ENSG00000160870.12	ENSG00000228204.2	0.170557	undirected	CYP3A7	RP4-724E13.2	lncRNA
ENSG00000160870.12	ENSG00000107807.12	0.169807	undirected	CYP3A7	TLX1	humanTF
ENSG00000160870.12	ENSG00000173757.9	0.167518	undirected	CYP3A7	STAT5B	humanTF
ENSG00000160870.12	ENSG00000226629.1	0.167167	undirected	CYP3A7	LINC00974	lncRNA
ENSG00000160870.12	ENSG00000256643.1	0.167091	undirected	CYP3A7	LINC02441	lncRNA
ENSG00000160870.12	ENSG00000275431.1	0.161269	undirected	CYP3A7	CTB-186H2.3	lncRNA
ENSG00000160870.12	ENSG00000264125.1	0.149012	undirected	CYP3A7	RP11-354P11.4	lncRNA
ENSG00000160870.12	ENSG00000178177.15	0.148563	undirected	CYP3A7	LCORL	humanTF
ENSG00000160870.12	ENSG00000272088.1	0.146561	undirected	CYP3A7	RP11-168F9.2	lncRNA
ENSG00000160870.12	ENSG00000231483.1	0.145601	undirected	CYP3A7	RP11-336A10.5	lncRNA
ENSG00000160870.12	ENSG00000279878.1	0.145145	undirected	CYP3A7	RP11-286N22.16	lncRNA
ENSG00000160870.12	ENSG00000261469.1	0.139946	undirected	CYP3A7	RP11-96D1.6	lncRNA
ENSG00000160870.12	ENSG00000280040.1	0.137958	undirected	CYP3A7	RP11-296E3.2	lncRNA
ENSG00000160870.12	ENSG00000255120.5	0.127218	undirected	CYP3A7	OVOL1-AS1	lncRNA
ENSG00000160870.12	ENSG00000205922.4	0.126596	undirected	CYP3A7	ONECUT3	humanTF
ENSG00000160870.12	ENSG00000151623.14	0.124736	undirected	CYP3A7	NR3C2	humanTF
ENSG00000160870.12	ENSG00000179195.15	0.124569	undirected	CYP3A7	ZNF664	humanTF
ENSG00000160870.12	ENSG00000214708.4	0.118705	undirected	CYP3A7	LOC105371730	lncRNA
ENSG00000160870.12	ENSG00000234393.1	0.114687	undirected	CYP3A7	RP11-211N11.5	lncRNA
ENSG00000160870.12	ENSG00000275897.1	0.112817	undirected	CYP3A7	RP11-94C24.13	lncRNA
ENSG00000160870.12	ENSG00000223947.1	0.112218	undirected	CYP3A7	AC016738.4	lncRNA
ENSG00000160870.12	ENSG00000170485.16	0.110537	undirected	CYP3A7	NPAS2	humanTF
ENSG00000160870.12	ENSG00000162664.16	0.109416	undirected	CYP3A7	ZNF326	humanTF
ENSG00000160870.12	ENSG00000280384.1	0.105892	undirected	CYP3A7	RP4-695O20.1	lncRNA
ENSG00000160870.12	ENSG00000224090.1	0.0935493	undirected	CYP3A7	LOC100129175	lncRNA
ENSG00000160870.12	ENSG00000240527.1	0.0926436	undirected	CYP3A7	RP11-429G19.3	lncRNA
ENSG00000160870.12	ENSG00000166349.9	0.0925822	undirected	CYP3A7	RAG1	humanTF
ENSG00000160870.12	ENSG00000251493.4	0.092433	undirected	CYP3A7	FOXD1	humanTF
ENSG00000160870.12	ENSG00000256443.1	0.0913485	undirected	CYP3A7	RP11-794G24.1	lncRNA
ENSG00000160870.12	ENSG00000272555.1	0.0884739	undirected	CYP3A7	RP11-459I19.1	lncRNA
ENSG00000160870.12	ENSG00000122034.14	0.086009	undirected	CYP3A7	GTF3A	humanTF
ENSG00000160870.12	ENSG00000266283.1	0.0846428	undirected	CYP3A7	RP11-627G18.1	lncRNA
ENSG00000160870.12	ENSG00000235021.1	0.0835431	undirected	CYP3A7	RP11-439E19.7	lncRNA
ENSG00000160870.12	ENSG00000234949.2	0.0829554	undirected	CYP3A7	LOC105373958	lncRNA
ENSG00000160870.12	ENSG00000235529.1	0.0817685	undirected	CYP3A7	AGAP1-IT1	lncRNA
ENSG00000160870.12	ENSG00000258940.2	0.0810197	undirected	CYP3A7	LOC100288846	lncRNA
ENSG00000160870.12	ENSG00000197933.12	0.0800328	undirected	CYP3A7	ZNF823	humanTF
ENSG00000160870.12	ENSG00000243943.9	0.0799683	undirected	CYP3A7	ZNF512	humanTF
ENSG00000160870.12	ENSG00000235097.1	0.0779218	undirected	CYP3A7	LINC00330	lncRNA
ENSG00000160870.12	ENSG00000254718.6	0.0779002	undirected	CYP3A7	LOC101927702	lncRNA
ENSG00000160870.12	ENSG00000228487.2	0.0772648	undirected	CYP3A7	RP13-225O21.2	lncRNA
ENSG00000160870.12	ENSG00000280162.1	0.0755629	undirected	CYP3A7	RP11-314N13.9	lncRNA
ENSG00000160870.12	ENSG00000225731.1	0.0748389	undirected	CYP3A7	AP001627.1	lncRNA
ENSG00000160870.12	ENSG00000155545.19	0.0732111	undirected	CYP3A7	MIER3	humanTF
ENSG00000160870.12	ENSG00000130338.12	0.0717834	undirected	CYP3A7	TULP4	humanTF
ENSG00000160870.12	ENSG00000248050.1	0.0681098	undirected	CYP3A7	RP11-422N16.3	lncRNA
ENSG00000160870.12	ENSG00000235023.1	0.0647453	undirected	CYP3A7	AP001626.2	lncRNA
ENSG00000160870.12	ENSG00000274080.1	0.0643271	undirected	CYP3A7	CTA-315H11.2	lncRNA
ENSG00000160870.12	ENSG00000250282.1	0.0631277	undirected	CYP3A7	RP5-875H18.4	lncRNA
ENSG00000160870.12	ENSG00000279110.1	0.0629658	undirected	CYP3A7	CTA-243E7.1	lncRNA
ENSG00000160870.12	ENSG00000196482.16	0.0622631	undirected	CYP3A7	ESRRG	humanTF
ENSG00000160870.12	ENSG00000242048.3	0.0620749	undirected	CYP3A7	LOC644090	lncRNA
ENSG00000160870.12	ENSG00000227192.1	0.060777	undirected	CYP3A7	RP1-45I4.3	lncRNA
ENSG00000160870.12	ENSG00000270194.1	0.0576877	undirected	CYP3A7	LOC152048	lncRNA
ENSG00000160870.12	ENSG00000258634.3	0.0569565	undirected	CYP3A7	RP4-773N10.4	lncRNA
ENSG00000160870.12	ENSG00000233590.1	0.05667	undirected	CYP3A7	RP11-153K11.3	lncRNA
ENSG00000160870.12	ENSG00000254003.1	0.0563665	undirected	CYP3A7	SRI-AS1	lncRNA
ENSG00000160870.12	ENSG00000266258.1	0.0558784	undirected	CYP3A7	LINC01909	lncRNA
ENSG00000160870.12	ENSG00000212978.6	0.0556104	undirected	CYP3A7	LOC339803	lncRNA
ENSG00000160870.12	ENSG00000168286.2	0.05378	undirected	CYP3A7	THAP11	humanTF
ENSG00000160870.12	ENSG00000251533.2	0.0536684	undirected	CYP3A7	LINC00605	lncRNA
ENSG00000160870.12	ENSG00000276166.1	0.0513891	undirected	CYP3A7	CTD-2600O9.2	lncRNA

## Sheet: g-Liver_blue_CYP3A4
Table S1-7: The TFs, lncRNAs, and miRNAs co-expressed with CYP3A4 in blue module in the third group.
From Node	To Node	Weight	direction	From Name	To Name	Type
ENSG00000160868.14	ENSG00000144331.18	0.15914	undirected	CYP3A4	ZNF385B	humanTF
ENSG00000160868.14	ENSG00000184517.11	0.15452	undirected	CYP3A4	ZFP1	humanTF
ENSG00000160868.14	ENSG00000205143.2	0.154003	undirected	CYP3A4	ARID3C	humanTF
ENSG00000160868.14	ENSG00000162599.15	0.14775	undirected	CYP3A4	NFIA	humanTF
ENSG00000160868.14	ENSG00000197905.8	0.145083	undirected	CYP3A4	TEAD4	humanTF
ENSG00000160868.14	ENSG00000167491.17	0.129662	undirected	CYP3A4	GATAD2A	humanTF
ENSG00000160868.14	ENSG00000118922.17	0.113499	undirected	CYP3A4	KLF12	humanTF
ENSG00000160868.14	ENSG00000169083.16	0.109588	undirected	CYP3A4	AR	humanTF
ENSG00000160868.14	ENSG00000151623.14	0.106984	undirected	CYP3A4	NR3C2	humanTF
ENSG00000160868.14	ENSG00000091831.22	0.106524	undirected	CYP3A4	ESR1	humanTF
ENSG00000160868.14	ENSG00000175727.13	0.0918901	undirected	CYP3A4	MLXIP	humanTF
ENSG00000160868.14	ENSG00000060566.13	0.0824323	undirected	CYP3A4	CREB3L3	humanTF
ENSG00000160868.14	ENSG00000108924.13	0.0816971	undirected	CYP3A4	HLF	humanTF
ENSG00000160868.14	ENSG00000074219.13	0.0811656	undirected	CYP3A4	TEAD2	humanTF
ENSG00000160868.14	ENSG00000060138.12	0.0809879	undirected	CYP3A4	YBX3	humanTF
ENSG00000160868.14	ENSG00000172493.20	0.0688645	undirected	CYP3A4	AFF1	humanTF
ENSG00000160868.14	ENSG00000156127.6	0.0668157	undirected	CYP3A4	BATF	humanTF
ENSG00000160868.14	ENSG00000114126.17	0.0620359	undirected	CYP3A4	TFDP2	humanTF
ENSG00000160868.14	ENSG00000108509.20	0.0606578	undirected	CYP3A4	CAMTA2	humanTF
ENSG00000160868.14	ENSG00000197013.9	0.059805	undirected	CYP3A4	ZNF429	humanTF
ENSG00000160868.14	ENSG00000151090.17	0.0552652	undirected	CYP3A4	THRB	humanTF
ENSG00000160868.14	ENSG00000109787.12	0.0544822	undirected	CYP3A4	KLF3	humanTF
ENSG00000160868.14	ENSG00000110925.6	0.0541636	undirected	CYP3A4	CSRNP2	humanTF
ENSG00000160868.14	ENSG00000104856.13	0.0538497	undirected	CYP3A4	RELB	humanTF
ENSG00000160868.14	ENSG00000139083.10	0.0521549	undirected	CYP3A4	ETV6	humanTF
ENSG00000160868.14	ENSG00000176542.9	0.0521364	undirected	CYP3A4	USF3	humanTF

## Sheet: h-Liver_turquoise_CYP3A5
Table S1-8: The TFs, lncRNAs, and miRNAs co-expressed with CYP3A5 in turquoise module in the third group.
From Node	To Node	Weight	direction	From Name	To Name	Type
ENSG00000106258.13	ENSG00000125520.13	0.146061	undirected	CYP3A5	SLC2A4RG	humanTF
ENSG00000106258.13	ENSG00000197114.11	0.145424	undirected	CYP3A5	ZGPAT	humanTF
ENSG00000106258.13	ENSG00000143257.11	0.123322	undirected	CYP3A5	NR1I3	humanTF
ENSG00000106258.13	ENSG00000029153.14	0.110371	undirected	CYP3A5	ARNTL2	humanTF
ENSG00000106258.13	ENSG00000107175.11	0.104232	undirected	CYP3A5	CREB3	humanTF
ENSG00000106258.13	ENSG00000100644.16	0.101094	undirected	CYP3A5	HIF1A	humanTF
ENSG00000106258.13	ENSG00000160094.14	0.0956592	undirected	CYP3A5	ZNF362	humanTF
ENSG00000106258.13	ENSG00000144852.17	0.0945981	undirected	CYP3A5	NR1I2	humanTF
ENSG00000106258.13	ENSG00000100105.17	0.0938196	undirected	CYP3A5	PATZ1	humanTF
ENSG00000106258.13	ENSG00000196693.14	0.0910069	undirected	CYP3A5	ZNF33B	humanTF
ENSG00000106258.13	ENSG00000032219.18	0.0888313	undirected	CYP3A5	ARID4A	humanTF
ENSG00000106258.13	ENSG00000029993.14	0.085203	undirected	CYP3A5	HMGB3	humanTF
ENSG00000106258.13	ENSG00000189403.14	0.0761159	undirected	CYP3A5	HMGB1	humanTF
ENSG00000106258.13	ENSG00000005436.13	0.0759611	undirected	CYP3A5	GCFC2	humanTF
ENSG00000106258.13	ENSG00000243678.11	0.0734419	undirected	CYP3A5	NME2	humanTF
ENSG00000106258.13	ENSG00000143365.17	0.0719627	undirected	CYP3A5	RORC	humanTF
ENSG00000106258.13	ENSG00000105516.10	0.0694751	undirected	CYP3A5	DBP	humanTF
ENSG00000106258.13	ENSG00000138380.17	0.0686045	undirected	CYP3A5	CARF	humanTF
ENSG00000106258.13	ENSG00000173041.11	0.0682509	undirected	CYP3A5	ZNF680	humanTF
ENSG00000106258.13	ENSG00000117625.13	0.0676573	undirected	CYP3A5	RCOR3	humanTF
ENSG00000106258.13	ENSG00000114853.13	0.0673861	undirected	CYP3A5	ZBTB47	humanTF
ENSG00000106258.13	ENSG00000188313.12	0.0673394	undirected	CYP3A5	PLSCR1	humanTF
ENSG00000106258.13	ENSG00000116990.10	0.0649037	undirected	CYP3A5	MYCL	humanTF
ENSG00000106258.13	ENSG00000142528.15	0.0608564	undirected	CYP3A5	ZNF473	humanTF
ENSG00000106258.13	ENSG00000078403.16	0.060347	undirected	CYP3A5	MLLT10	humanTF
ENSG00000106258.13	ENSG00000136936.10	0.0539518	undirected	CYP3A5	XPA	humanTF
ENSG00000106258.13	ENSG00000182568.16	0.0526182	undirected	CYP3A5	SATB1	humanTF
ENSG00000106258.13	ENSG00000179922.5	0.0514495	undirected	CYP3A5	ZNF784	humanTF
ENSG00000106258.13	ENSG00000136169.16	0.0505808	undirected	CYP3A5	SETDB2	humanTF

## Sheet: i-Liver_turquoise_CYP3A7
Table S1-9: The TFs, lncRNAs, and miRNAs co-expressed with CYP3A7 in turquoise module in the third group.
From Node	To Node	Weight	direction	From Name	To Name	Type
ENSG00000160870.12	ENSG00000197114.11	0.157914	undirected	CYP3A7	ZGPAT	humanTF
ENSG00000160870.12	ENSG00000125520.13	0.142275	undirected	CYP3A7	SLC2A4RG	humanTF
ENSG00000160870.12	ENSG00000143257.11	0.110138	undirected	CYP3A7	NR1I3	humanTF
ENSG00000160870.12	ENSG00000029153.14	0.109835	undirected	CYP3A7	ARNTL2	humanTF
ENSG00000160870.12	ENSG00000100644.16	0.0963973	undirected	CYP3A7	HIF1A	humanTF
ENSG00000160870.12	ENSG00000107175.11	0.0929384	undirected	CYP3A7	CREB3	humanTF
ENSG00000160870.12	ENSG00000160094.14	0.092856	undirected	CYP3A7	ZNF362	humanTF
ENSG00000160870.12	ENSG00000100105.17	0.0920813	undirected	CYP3A7	PATZ1	humanTF
ENSG00000160870.12	ENSG00000032219.18	0.0894748	undirected	CYP3A7	ARID4A	humanTF
ENSG00000160870.12	ENSG00000196693.14	0.0840027	undirected	CYP3A7	ZNF33B	humanTF
ENSG00000160870.12	ENSG00000029993.14	0.0819208	undirected	CYP3A7	HMGB3	humanTF
ENSG00000160870.12	ENSG00000144852.17	0.0806815	undirected	CYP3A7	NR1I2	humanTF
ENSG00000160870.12	ENSG00000243678.11	0.0787505	undirected	CYP3A7	NME2	humanTF
ENSG00000160870.12	ENSG00000105516.10	0.0773617	undirected	CYP3A7	DBP	humanTF
ENSG00000160870.12	ENSG00000114853.13	0.0750149	undirected	CYP3A7	ZBTB47	humanTF
ENSG00000160870.12	ENSG00000188313.12	0.0720352	undirected	CYP3A7	PLSCR1	humanTF
ENSG00000160870.12	ENSG00000005436.13	0.0719341	undirected	CYP3A7	GCFC2	humanTF
ENSG00000160870.12	ENSG00000142528.15	0.0717306	undirected	CYP3A7	ZNF473	humanTF
ENSG00000160870.12	ENSG00000189403.14	0.0707446	undirected	CYP3A7	HMGB1	humanTF
ENSG00000160870.12	ENSG00000173041.11	0.0677317	undirected	CYP3A7	ZNF680	humanTF
ENSG00000160870.12	ENSG00000138380.17	0.0650849	undirected	CYP3A7	CARF	humanTF
ENSG00000160870.12	ENSG00000116990.10	0.0622064	undirected	CYP3A7	MYCL	humanTF
ENSG00000160870.12	ENSG00000143365.17	0.0614795	undirected	CYP3A7	RORC	humanTF
ENSG00000160870.12	ENSG00000078403.16	0.0591635	undirected	CYP3A7	MLLT10	humanTF
ENSG00000160870.12	ENSG00000117625.13	0.053638	undirected	CYP3A7	RCOR3	humanTF
ENSG00000160870.12	ENSG00000119725.18	0.0528124	undirected	CYP3A7	ZNF410	humanTF
ENSG00000160870.12	ENSG00000136936.10	0.0512111	undirected	CYP3A7	XPA	humanTF

## Sheet: j-SI_blue_CYP3A4
Table S1-10: The TFs, lncRNAs, and miRNAs co-expressed with CYP3A4 in blue module in the fourth group.
From Node	To Node	Weight	direction	From Name	To Name	Type
ENSG00000160868.14	ENSG00000166268.10	0.347048	undirected	CYP3A4	MYRFL	humanTF
ENSG00000160868.14	ENSG00000135100.17	0.334553	undirected	CYP3A4	HNF1A	humanTF
ENSG00000160868.14	ENSG00000144852.17	0.326966	undirected	CYP3A4	NR1I2	humanTF
ENSG00000160868.14	ENSG00000164749.11	0.324002	undirected	CYP3A4	HNF4G	humanTF
ENSG00000160868.14	ENSG00000130700.6	0.320834	undirected	CYP3A4	GATA5	humanTF
ENSG00000160868.14	ENSG00000173153.13	0.310255	undirected	CYP3A4	ESRRA	humanTF
ENSG00000160868.14	ENSG00000172818.9	0.306495	undirected	CYP3A4	OVOL1	humanTF
ENSG00000160868.14	ENSG00000175329.12	0.301761	undirected	CYP3A4	ISX	humanTF
ENSG00000160868.14	ENSG00000125850.10	0.297287	undirected	CYP3A4	OVOL2	humanTF
ENSG00000160868.14	ENSG00000116833.13	0.297075	undirected	CYP3A4	NR5A2	humanTF
ENSG00000160868.14	ENSG00000275410.4	0.293486	undirected	CYP3A4	HNF1B	humanTF
ENSG00000160868.14	ENSG00000160685.13	0.288466	undirected	CYP3A4	ZBTB7B	humanTF
ENSG00000160868.14	ENSG00000012504.13	0.286414	undirected	CYP3A4	NR1H4	humanTF
ENSG00000160868.14	ENSG00000101076.16	0.28018	undirected	CYP3A4	HNF4A	humanTF
ENSG00000160868.14	ENSG00000117595.10	0.279517	undirected	CYP3A4	IRF6	humanTF
ENSG00000160868.14	ENSG00000043039.6	0.275912	undirected	CYP3A4	BARX2	humanTF
ENSG00000160868.14	ENSG00000111424.10	0.275382	undirected	CYP3A4	VDR	humanTF
ENSG00000160868.14	ENSG00000060566.13	0.273079	undirected	CYP3A4	CREB3L3	humanTF
ENSG00000160868.14	ENSG00000167800.9	0.270076	undirected	CYP3A4	TBX10	humanTF
ENSG00000160868.14	ENSG00000265763.3	0.264202	undirected	CYP3A4	ZNF488	humanTF
ENSG00000160868.14	ENSG00000124920.13	0.254819	undirected	CYP3A4	MYRF	humanTF
ENSG00000160868.14	ENSG00000132024.17	0.248506	undirected	CYP3A4	CC2D1A	humanTF
ENSG00000160868.14	ENSG00000102554.13	0.240019	undirected	CYP3A4	KLF5	humanTF
ENSG00000160868.14	ENSG00000083307.10	0.239363	undirected	CYP3A4	GRHL2	humanTF
ENSG00000160868.14	ENSG00000108788.11	0.23757	undirected	CYP3A4	MLX	humanTF
ENSG00000160868.14	ENSG00000165556.9	0.233527	undirected	CYP3A4	CDX2	humanTF
ENSG00000160868.14	ENSG00000141448.8	0.229627	undirected	CYP3A4	GATA6	humanTF
ENSG00000160868.14	ENSG00000103460.16	0.224767	undirected	CYP3A4	TOX3	humanTF
ENSG00000160868.14	ENSG00000172238.4	0.22082	undirected	CYP3A4	ATOH1	humanTF
ENSG00000160868.14	ENSG00000153814.11	0.218117	undirected	CYP3A4	JAZF1	humanTF
ENSG00000160868.14	ENSG00000130675.14	0.21721	undirected	CYP3A4	MNX1	humanTF
ENSG00000160868.14	ENSG00000124664.10	0.210496	undirected	CYP3A4	SPDEF	humanTF
ENSG00000160868.14	ENSG00000113722.16	0.204518	undirected	CYP3A4	CDX1	humanTF
ENSG00000160868.14	ENSG00000129514.5	0.203901	undirected	CYP3A4	FOXA1	humanTF
ENSG00000160868.14	ENSG00000170608.2	0.188152	undirected	CYP3A4	FOXA3	humanTF
ENSG00000160868.14	ENSG00000163435.15	0.183213	undirected	CYP3A4	ELF3	humanTF
ENSG00000160868.14	ENSG00000174282.11	0.180712	undirected	CYP3A4	ZBTB4	humanTF
ENSG00000160868.14	ENSG00000189120.4	0.178257	undirected	CYP3A4	SP6	humanTF
ENSG00000160868.14	ENSG00000205189.11	0.176549	undirected	CYP3A4	ZBTB10	humanTF
ENSG00000160868.14	ENSG00000157613.10	0.174419	undirected	CYP3A4	CREB3L1	humanTF
ENSG00000160868.14	ENSG00000172819.16	0.172782	undirected	CYP3A4	RARG	humanTF
ENSG00000160868.14	ENSG00000104447.12	0.170382	undirected	CYP3A4	TRPS1	humanTF
ENSG00000160868.14	ENSG00000163497.2	0.16569	undirected	CYP3A4	FEV	humanTF
ENSG00000160868.14	ENSG00000074657.13	0.164708	undirected	CYP3A4	ZNF532	humanTF
ENSG00000160868.14	ENSG00000059728.10	0.163684	undirected	CYP3A4	MXD1	humanTF
ENSG00000160868.14	ENSG00000111145.7	0.162278	undirected	CYP3A4	ELK3	humanTF
ENSG00000160868.14	ENSG00000204531.17	0.16213	undirected	CYP3A4	POU5F1	humanTF
ENSG00000160868.14	ENSG00000160973.7	0.16208	undirected	CYP3A4	FOXH1	humanTF
ENSG00000160868.14	ENSG00000152217.16	0.155965	undirected	CYP3A4	SETBP1	humanTF
ENSG00000160868.14	ENSG00000169740.13	0.154752	undirected	CYP3A4	ZNF32	humanTF
ENSG00000160868.14	ENSG00000135373.12	0.152782	undirected	CYP3A4	EHF	humanTF
ENSG00000160868.14	ENSG00000245848.2	0.150744	undirected	CYP3A4	CEBPA	humanTF
ENSG00000160868.14	ENSG00000185650.9	0.149627	undirected	CYP3A4	ZFP36L1	humanTF
ENSG00000160868.14	ENSG00000162992.3	0.148364	undirected	CYP3A4	NEUROD1	humanTF
ENSG00000160868.14	ENSG00000116793.15	0.147967	undirected	CYP3A4	PHTF1	humanTF
ENSG00000160868.14	ENSG00000009950.15	0.146928	undirected	CYP3A4	MLXIPL	humanTF
ENSG00000160868.14	ENSG00000069812.11	0.146588	undirected	CYP3A4	HES2	humanTF
ENSG00000160868.14	ENSG00000131910.4	0.142392	undirected	CYP3A4	NR0B2	humanTF
ENSG00000160868.14	ENSG00000166526.16	0.141405	undirected	CYP3A4	ZNF3	humanTF
ENSG00000160868.14	ENSG00000131788.15	0.139879	undirected	CYP3A4	PIAS3	humanTF
ENSG00000160868.14	ENSG00000128645.14	0.139109	undirected	CYP3A4	HOXD1	humanTF
ENSG00000160868.14	ENSG00000126003.6	0.136606	undirected	CYP3A4	PLAGL2	humanTF
ENSG00000160868.14	ENSG00000114439.18	0.136445	undirected	CYP3A4	BBX	humanTF
ENSG00000160868.14	ENSG00000116132.11	0.136016	undirected	CYP3A4	PRRX1	humanTF
ENSG00000160868.14	ENSG00000185002.9	0.135922	undirected	CYP3A4	RFX6	humanTF
ENSG00000160868.14	ENSG00000152784.15	0.135885	undirected	CYP3A4	PRDM8	humanTF
ENSG00000160868.14	ENSG00000175745.11	0.133536	undirected	CYP3A4	NR2F1	humanTF
ENSG00000160868.14	ENSG00000147488.11	0.130905	undirected	CYP3A4	ST18	humanTF
ENSG00000160868.14	ENSG00000130584.10	0.129995	undirected	CYP3A4	ZBTB46	humanTF
ENSG00000160868.14	ENSG00000147180.16	0.129399	undirected	CYP3A4	ZNF711	humanTF
ENSG00000160868.14	ENSG00000169554.18	0.128856	undirected	CYP3A4	ZEB2	humanTF
ENSG00000160868.14	ENSG00000167635.11	0.127939	undirected	CYP3A4	ZNF146	humanTF
ENSG00000160868.14	ENSG00000187607.15	0.127611	undirected	CYP3A4	ZNF286A	humanTF
ENSG00000160868.14	ENSG00000179528.15	0.126432	undirected	CYP3A4	LBX2	humanTF
ENSG00000160868.14	ENSG00000178573.6	0.123691	undirected	CYP3A4	MAF	humanTF
ENSG00000160868.14	ENSG00000188171.15	0.121743	undirected	CYP3A4	ZNF626	humanTF
ENSG00000160868.14	ENSG00000162714.12	0.121269	undirected	CYP3A4	ZNF496	humanTF
ENSG00000160868.14	ENSG00000175322.11	0.120487	undirected	CYP3A4	ZNF519	humanTF
ENSG00000160868.14	ENSG00000173039.18	0.119085	undirected	CYP3A4	RELA	humanTF
ENSG00000160868.14	ENSG00000185252.18	0.118911	undirected	CYP3A4	ZNF74	humanTF
ENSG00000160868.14	ENSG00000187792.4	0.118157	undirected	CYP3A4	ZNF70	humanTF
ENSG00000160868.14	ENSG00000122691.12	0.117301	undirected	CYP3A4	TWIST1	humanTF
ENSG00000160868.14	ENSG00000171295.12	0.117117	undirected	CYP3A4	ZNF440	humanTF
ENSG00000160868.14	ENSG00000196793.13	0.117073	undirected	CYP3A4	ZNF239	humanTF
ENSG00000160868.14	ENSG00000115355.15	0.116502	undirected	CYP3A4	CCDC88A	humanTF
ENSG00000160868.14	ENSG00000128710.5	0.116421	undirected	CYP3A4	HOXD10	humanTF
ENSG00000160868.14	ENSG00000006047.12	0.116171	undirected	CYP3A4	YBX2	humanTF
ENSG00000160868.14	ENSG00000115966.16	0.115926	undirected	CYP3A4	ATF2	humanTF
ENSG00000160868.14	ENSG00000146676.8	0.114881	undirected	CYP3A4	PURB	humanTF
ENSG00000160868.14	ENSG00000004848.7	0.114253	undirected	CYP3A4	ARX	humanTF
ENSG00000160868.14	ENSG00000179388.8	0.113709	undirected	CYP3A4	EGR3	humanTF
ENSG00000160868.14	ENSG00000151500.14	0.113133	undirected	CYP3A4	THYN1	humanTF
ENSG00000160868.14	ENSG00000198963.10	0.111919	undirected	CYP3A4	RORB	humanTF
ENSG00000160868.14	ENSG00000124613.8	0.111629	undirected	CYP3A4	ZNF391	humanTF
ENSG00000160868.14	ENSG00000124782.19	0.11111	undirected	CYP3A4	RREB1	humanTF
ENSG00000160868.14	ENSG00000152926.14	0.110304	undirected	CYP3A4	ZNF117	humanTF
ENSG00000160868.14	ENSG00000164920.9	0.109936	undirected	CYP3A4	OSR2	humanTF
ENSG00000160868.14	ENSG00000161298.17	0.109756	undirected	CYP3A4	ZNF382	humanTF
ENSG00000160868.14	ENSG00000139154.14	0.10958	undirected	CYP3A4	AEBP2	humanTF
ENSG00000160868.14	ENSG00000091831.22	0.109565	undirected	CYP3A4	ESR1	humanTF
ENSG00000160868.14	ENSG00000116990.10	0.10936	undirected	CYP3A4	MYCL	humanTF
ENSG00000160868.14	ENSG00000115112.7	0.109136	undirected	CYP3A4	TFCP2L1	humanTF
ENSG00000160868.14	ENSG00000197050.10	0.108237	undirected	CYP3A4	ZNF420	humanTF
ENSG00000160868.14	ENSG00000073282.12	0.108029	undirected	CYP3A4	TP63	humanTF
ENSG00000160868.14	ENSG00000165702.13	0.1075	undirected	CYP3A4	GFI1B	humanTF
ENSG00000160868.14	ENSG00000159556.9	0.107392	undirected	CYP3A4	ISL2	humanTF
ENSG00000160868.14	ENSG00000213793.5	0.107349	undirected	CYP3A4	ZNF888	humanTF
ENSG00000160868.14	ENSG00000137709.9	0.106957	undirected	CYP3A4	POU2F3	humanTF
ENSG00000160868.14	ENSG00000236609.3	0.106322	undirected	CYP3A4	ZNF853	humanTF
ENSG00000160868.14	ENSG00000101190.12	0.106298	undirected	CYP3A4	TCFL5	humanTF
ENSG00000160868.14	ENSG00000181444.12	0.106218	undirected	CYP3A4	ZNF467	humanTF
ENSG00000160868.14	ENSG00000113580.14	0.105739	undirected	CYP3A4	NR3C1	humanTF
ENSG00000160868.14	ENSG00000056277.15	0.10508	undirected	CYP3A4	ZNF280C	humanTF
ENSG00000160868.14	ENSG00000181007.8	0.104444	undirected	CYP3A4	ZFP82	humanTF
ENSG00000160868.14	ENSG00000125482.12	0.104175	undirected	CYP3A4	TTF1	humanTF
ENSG00000160868.14	ENSG00000122877.15	0.104098	undirected	CYP3A4	EGR2	humanTF
ENSG00000160868.14	ENSG00000249459.8	0.103487	undirected	CYP3A4	ZNF286B	humanTF
ENSG00000160868.14	ENSG00000249709.7	0.101738	undirected	CYP3A4	ZNF564	humanTF
ENSG00000160868.14	ENSG00000196437.10	0.101505	undirected	CYP3A4	ZNF569	humanTF
ENSG00000160868.14	ENSG00000169131.11	0.10149	undirected	CYP3A4	ZNF354A	humanTF
ENSG00000160868.14	ENSG00000177732.8	0.101132	undirected	CYP3A4	SOX12	humanTF
ENSG00000160868.14	ENSG00000181894.14	0.100955	undirected	CYP3A4	ZNF329	humanTF
ENSG00000160868.14	ENSG00000173451.6	0.100417	undirected	CYP3A4	THAP2	humanTF
ENSG00000160868.14	ENSG00000157657.14	0.0994972	undirected	CYP3A4	ZNF618	humanTF
ENSG00000160868.14	ENSG00000161642.17	0.0993823	undirected	CYP3A4	ZNF385A	humanTF
ENSG00000160868.14	ENSG00000005102.12	0.0991965	undirected	CYP3A4	MEOX1	humanTF
ENSG00000160868.14	ENSG00000081386.12	0.0990105	undirected	CYP3A4	ZNF510	humanTF
ENSG00000160868.14	ENSG00000018869.16	0.0988126	undirected	CYP3A4	ZNF582	humanTF
ENSG00000160868.14	ENSG00000025156.12	0.0986403	undirected	CYP3A4	HSF2	humanTF
ENSG00000160868.14	ENSG00000159592.10	0.0980937	undirected	CYP3A4	GPBP1L1	humanTF
ENSG00000160868.14	ENSG00000272602.5	0.0979964	undirected	CYP3A4	ZNF595	humanTF
ENSG00000160868.14	ENSG00000126767.17	0.0977261	undirected	CYP3A4	ELK1	humanTF
ENSG00000160868.14	ENSG00000198342.9	0.0973975	undirected	CYP3A4	ZNF442	humanTF
ENSG00000160868.14	ENSG00000196460.12	0.0972861	undirected	CYP3A4	RFX8	humanTF
ENSG00000160868.14	ENSG00000214717.11	0.097201	undirected	CYP3A4	ZBED1	humanTF
ENSG00000160868.14	ENSG00000122482.20	0.096658	undirected	CYP3A4	ZNF644	humanTF
ENSG00000160868.14	ENSG00000127528.5	0.0961245	undirected	CYP3A4	KLF2	humanTF
ENSG00000160868.14	ENSG00000016082.14	0.0957475	undirected	CYP3A4	ISL1	humanTF
ENSG00000160868.14	ENSG00000125798.14	0.0957185	undirected	CYP3A4	FOXA2	humanTF
ENSG00000160868.14	ENSG00000084093.16	0.0955314	undirected	CYP3A4	REST	humanTF
ENSG00000160868.14	ENSG00000185869.14	0.0948475	undirected	CYP3A4	ZNF829	humanTF
ENSG00000160868.14	ENSG00000250312.6	0.0945193	undirected	CYP3A4	ZNF718	humanTF
ENSG00000160868.14	ENSG00000160321.14	0.0944429	undirected	CYP3A4	ZNF208	humanTF
ENSG00000160868.14	ENSG00000186777.11	0.0943982	undirected	CYP3A4	ZNF732	humanTF
ENSG00000160868.14	ENSG00000185122.10	0.0941709	undirected	CYP3A4	HSF1	humanTF
ENSG00000160868.14	ENSG00000106331.15	0.0938539	undirected	CYP3A4	PAX4	humanTF
ENSG00000160868.14	ENSG00000180479.13	0.0935807	undirected	CYP3A4	ZNF571	humanTF
ENSG00000160868.14	ENSG00000221923.8	0.0935444	undirected	CYP3A4	ZNF880	humanTF
ENSG00000160868.14	ENSG00000242852.6	0.0935215	undirected	CYP3A4	ZNF709	humanTF
ENSG00000160868.14	ENSG00000168826.15	0.0931623	undirected	CYP3A4	ZBTB49	humanTF
ENSG00000160868.14	ENSG00000198546.14	0.0930738	undirected	CYP3A4	ZNF511	humanTF
ENSG00000160868.14	ENSG00000162702.7	0.0924267	undirected	CYP3A4	ZNF281	humanTF
ENSG00000160868.14	ENSG00000197062.11	0.0923202	undirected	CYP3A4	ZSCAN26	humanTF
ENSG00000160868.14	ENSG00000197279.3	0.09232	undirected	CYP3A4	ZNF165	humanTF
ENSG00000160868.14	ENSG00000186017.14	0.0919911	undirected	CYP3A4	ZNF566	humanTF
ENSG00000160868.14	ENSG00000125398.5	0.0919791	undirected	CYP3A4	SOX9	humanTF
ENSG00000160868.14	ENSG00000134107.4	0.0917973	undirected	CYP3A4	BHLHE40	humanTF
ENSG00000160868.14	ENSG00000167034.9	0.0915867	undirected	CYP3A4	NKX3-1	humanTF
ENSG00000160868.14	ENSG00000181450.17	0.0911574	undirected	CYP3A4	ZNF678	humanTF
ENSG00000160868.14	ENSG00000005436.13	0.0909563	undirected	CYP3A4	GCFC2	humanTF
ENSG00000160868.14	ENSG00000186766.7	0.0908099	undirected	CYP3A4	FOXI2	humanTF
ENSG00000160868.14	ENSG00000123685.8	0.0905464	undirected	CYP3A4	BATF3	humanTF
ENSG00000160868.14	ENSG00000188227.12	0.0904188	undirected	CYP3A4	ZNF793	humanTF
ENSG00000160868.14	ENSG00000141040.14	0.0902588	undirected	CYP3A4	ZNF287	humanTF
ENSG00000160868.14	ENSG00000010030.13	0.0901822	undirected	CYP3A4	ETV7	humanTF
ENSG00000160868.14	ENSG00000166478.9	0.0900714	undirected	CYP3A4	ZNF143	humanTF
ENSG00000160868.14	ENSG00000179772.7	0.0900652	undirected	CYP3A4	FOXS1	humanTF
ENSG00000160868.14	ENSG00000169714.16	0.090043	undirected	CYP3A4	CNBP	humanTF
ENSG00000160868.14	ENSG00000177374.12	0.0896099	undirected	CYP3A4	HIC1	humanTF
ENSG00000160868.14	ENSG00000125812.15	0.0892325	undirected	CYP3A4	GZF1	humanTF
ENSG00000160868.14	ENSG00000120784.15	0.0892074	undirected	CYP3A4	ZFP30	humanTF
ENSG00000160868.14	ENSG00000197497.10	0.0891438	undirected	CYP3A4	ZNF665	humanTF
ENSG00000160868.14	ENSG00000105991.7	0.088669	undirected	CYP3A4	HOXA1	humanTF
ENSG00000160868.14	ENSG00000178229.7	0.0879884	undirected	CYP3A4	ZNF543	humanTF
ENSG00000160868.14	ENSG00000109381.19	0.0878625	undirected	CYP3A4	ELF2	humanTF
ENSG00000160868.14	ENSG00000130844.16	0.0878252	undirected	CYP3A4	ZNF331	humanTF
ENSG00000160868.14	ENSG00000079432.7	0.0876621	undirected	CYP3A4	CIC	humanTF
ENSG00000160868.14	ENSG00000127903.13	0.0866921	undirected	CYP3A4	ZNF835	humanTF
ENSG00000160868.14	ENSG00000071655.17	0.0864123	undirected	CYP3A4	MBD3	humanTF
ENSG00000160868.14	ENSG00000177888.7	0.0861998	undirected	CYP3A4	ZBTB41	humanTF
ENSG00000160868.14	ENSG00000125820.5	0.0860815	undirected	CYP3A4	NKX2-2	humanTF
ENSG00000160868.14	ENSG00000189420.8	0.0858629	undirected	CYP3A4	ZFP92	humanTF
ENSG00000160868.14	ENSG00000066827.15	0.0857777	undirected	CYP3A4	ZFAT	humanTF
ENSG00000160868.14	ENSG00000170689.9	0.0854466	undirected	CYP3A4	HOXB9	humanTF
ENSG00000160868.14	ENSG00000171223.5	0.0851928	undirected	CYP3A4	JUNB	humanTF
ENSG00000160868.14	ENSG00000167232.13	0.0849619	undirected	CYP3A4	ZNF91	humanTF
ENSG00000160868.14	ENSG00000132170.19	0.0844771	undirected	CYP3A4	PPARG	humanTF
ENSG00000160868.14	ENSG00000185219.16	0.0836846	undirected	CYP3A4	ZNF445	humanTF
ENSG00000160868.14	ENSG00000163795.13	0.0834402	undirected	CYP3A4	ZNF513	humanTF
ENSG00000160868.14	ENSG00000167981.5	0.0834291	undirected	CYP3A4	ZNF597	humanTF
ENSG00000160868.14	ENSG00000121864.9	0.0833315	undirected	CYP3A4	ZNF639	humanTF
ENSG00000160868.14	ENSG00000177932.6	0.0829379	undirected	CYP3A4	ZNF354C	humanTF
ENSG00000160868.14	ENSG00000183734.4	0.0828551	undirected	CYP3A4	ASCL2	humanTF
ENSG00000160868.14	ENSG00000186272.12	0.0825782	undirected	CYP3A4	ZNF17	humanTF
ENSG00000160868.14	ENSG00000198105.13	0.0824619	undirected	CYP3A4	ZNF248	humanTF
ENSG00000160868.14	ENSG00000258405.9	0.0820423	undirected	CYP3A4	ZNF578	humanTF
ENSG00000160868.14	ENSG00000078403.16	0.0818798	undirected	CYP3A4	MLLT10	humanTF
ENSG00000160868.14	ENSG00000197863.8	0.0817389	undirected	CYP3A4	ZNF790	humanTF
ENSG00000160868.14	ENSG00000148337.20	0.0816914	undirected	CYP3A4	CIZ1	humanTF
ENSG00000160868.14	ENSG00000029993.14	0.0816767	undirected	CYP3A4	HMGB3	humanTF
ENSG00000160868.14	ENSG00000196724.12	0.0813281	undirected	CYP3A4	ZNF418	humanTF
ENSG00000160868.14	ENSG00000184058.12	0.0811756	undirected	CYP3A4	TBX1	humanTF
ENSG00000160868.14	ENSG00000196214.10	0.0806667	undirected	CYP3A4	ZNF766	humanTF
ENSG00000160868.14	ENSG00000198551.9	0.0806596	undirected	CYP3A4	ZNF627	humanTF
ENSG00000160868.14	ENSG00000163939.18	0.0803453	undirected	CYP3A4	PBRM1	humanTF
ENSG00000160868.14	ENSG00000189042.13	0.0800892	undirected	CYP3A4	ZNF567	humanTF
ENSG00000160868.14	ENSG00000125520.13	0.0799013	undirected	CYP3A4	SLC2A4RG	humanTF
ENSG00000160868.14	ENSG00000089335.20	0.0797085	undirected	CYP3A4	ZNF302	humanTF
ENSG00000160868.14	ENSG00000157557.11	0.0796499	undirected	CYP3A4	ETS2	humanTF
ENSG00000160868.14	ENSG00000198039.11	0.0791733	undirected	CYP3A4	ZNF273	humanTF
ENSG00000160868.14	ENSG00000196700.8	0.0783873	undirected	CYP3A4	ZNF512B	humanTF
ENSG00000160868.14	ENSG00000120798.16	0.0783553	undirected	CYP3A4	NR2C1	humanTF
ENSG00000160868.14	ENSG00000213762.11	0.078281	undirected	CYP3A4	ZNF134	humanTF
ENSG00000160868.14	ENSG00000197951.8	0.0782633	undirected	CYP3A4	ZNF71	humanTF
ENSG00000160868.14	ENSG00000186564.5	0.0778529	undirected	CYP3A4	FOXD2	humanTF
ENSG00000160868.14	ENSG00000138375.12	0.0776465	undirected	CYP3A4	SMARCAL1	humanTF
ENSG00000160868.14	ENSG00000170260.8	0.0776343	undirected	CYP3A4	ZNF212	humanTF
ENSG00000160868.14	ENSG00000178338.10	0.0775154	undirected	CYP3A4	ZNF354B	humanTF
ENSG00000160868.14	ENSG00000180357.9	0.0774716	undirected	CYP3A4	ZNF609	humanTF
ENSG00000160868.14	ENSG00000179111.8	0.0774514	undirected	CYP3A4	HES7	humanTF
ENSG00000160868.14	ENSG00000135457.9	0.0768547	undirected	CYP3A4	TFCP2	humanTF
ENSG00000160868.14	ENSG00000168214.20	0.0766979	undirected	CYP3A4	RBPJ	humanTF
ENSG00000160868.14	ENSG00000142556.18	0.07661	undirected	CYP3A4	ZNF614	humanTF
ENSG00000160868.14	ENSG00000025434.18	0.0764991	undirected	CYP3A4	NR1H3	humanTF
ENSG00000160868.14	ENSG00000121413.12	0.0762022	undirected	CYP3A4	ZSCAN18	humanTF
ENSG00000160868.14	ENSG00000131845.14	0.075616	undirected	CYP3A4	ZNF304	humanTF
ENSG00000160868.14	ENSG00000160094.14	0.0753605	undirected	CYP3A4	ZNF362	humanTF
ENSG00000160868.14	ENSG00000163666.8	0.0752919	undirected	CYP3A4	HESX1	humanTF
ENSG00000160868.14	ENSG00000123411.14	0.0752826	undirected	CYP3A4	IKZF4	humanTF
ENSG00000160868.14	ENSG00000115568.15	0.0751448	undirected	CYP3A4	ZNF142	humanTF
ENSG00000160868.14	ENSG00000164916.10	0.0745999	undirected	CYP3A4	FOXK1	humanTF
ENSG00000160868.14	ENSG00000188095.4	0.0745717	undirected	CYP3A4	MESP2	humanTF
ENSG00000160868.14	ENSG00000254004.6	0.0745606	undirected	CYP3A4	ZNF260	humanTF
ENSG00000160868.14	ENSG00000150907.7	0.0739534	undirected	CYP3A4	FOXO1	humanTF
ENSG00000160868.14	ENSG00000180035.12	0.0738405	undirected	CYP3A4	ZNF48	humanTF
ENSG00000160868.14	ENSG00000181722.16	0.073693	undirected	CYP3A4	ZBTB20	humanTF
ENSG00000160868.14	ENSG00000275111.4	0.0735765	undirected	CYP3A4	ZNF2	humanTF
ENSG00000160868.14	ENSG00000068305.17	0.0728382	undirected	CYP3A4	MEF2A	humanTF
ENSG00000160868.14	ENSG00000119508.17	0.0725187	undirected	CYP3A4	NR4A3	humanTF
ENSG00000160868.14	ENSG00000111269.2	0.0718317	undirected	CYP3A4	CREBL2	humanTF
ENSG00000160868.14	ENSG00000189298.13	0.0717377	undirected	CYP3A4	ZKSCAN3	humanTF
ENSG00000160868.14	ENSG00000088876.11	0.0717032	undirected	CYP3A4	ZNF343	humanTF
ENSG00000160868.14	ENSG00000104177.17	0.0712434	undirected	CYP3A4	MYEF2	humanTF
ENSG00000160868.14	ENSG00000160961.11	0.07124	undirected	CYP3A4	ZNF333	humanTF
ENSG00000160868.14	ENSG00000114861.18	0.0711739	undirected	CYP3A4	FOXP1	humanTF
ENSG00000160868.14	ENSG00000171827.10	0.0710072	undirected	CYP3A4	ZNF570	humanTF
ENSG00000160868.14	ENSG00000197128.11	0.0699447	undirected	CYP3A4	ZNF772	humanTF
ENSG00000160868.14	ENSG00000144792.9	0.0697502	undirected	CYP3A4	ZNF660	humanTF
ENSG00000160868.14	ENSG00000198455.4	0.0695424	undirected	CYP3A4	ZXDB	humanTF
ENSG00000160868.14	ENSG00000198205.6	0.0693898	undirected	CYP3A4	ZXDA	humanTF
ENSG00000160868.14	ENSG00000181220.15	0.0693696	undirected	CYP3A4	ZNF746	humanTF
ENSG00000160868.14	ENSG00000196453.7	0.0692291	undirected	CYP3A4	ZNF777	humanTF
ENSG00000160868.14	ENSG00000181472.4	0.0691803	undirected	CYP3A4	ZBTB2	humanTF
ENSG00000160868.14	ENSG00000065970.8	0.0686643	undirected	CYP3A4	FOXJ2	humanTF
ENSG00000160868.14	ENSG00000257446.3	0.0686069	undirected	CYP3A4	ZNF878	humanTF
ENSG00000160868.14	ENSG00000196378.11	0.068368	undirected	CYP3A4	ZNF34	humanTF
ENSG00000160868.14	ENSG00000234284.6	0.0670936	undirected	CYP3A4	ZNF879	humanTF
ENSG00000160868.14	ENSG00000170949.17	0.0666598	undirected	CYP3A4	ZNF160	humanTF
ENSG00000160868.14	ENSG00000173404.4	0.0666184	undirected	CYP3A4	INSM1	humanTF
ENSG00000160868.14	ENSG00000128272.14	0.0664403	undirected	CYP3A4	ATF4	humanTF
ENSG00000160868.14	ENSG00000100811.12	0.0662304	undirected	CYP3A4	YY1	humanTF
ENSG00000160868.14	ENSG00000214029.4	0.065952	undirected	CYP3A4	ZNF891	humanTF
ENSG00000160868.14	ENSG00000158691.14	0.0659209	undirected	CYP3A4	ZSCAN12	humanTF
ENSG00000160868.14	ENSG00000188629.11	0.0656799	undirected	CYP3A4	ZNF177	humanTF
ENSG00000160868.14	ENSG00000153896.17	0.0655625	undirected	CYP3A4	ZNF599	humanTF
ENSG00000160868.14	ENSG00000176222.8	0.0651951	undirected	CYP3A4	ZNF404	humanTF
ENSG00000160868.14	ENSG00000143458.11	0.0650701	undirected	CYP3A4	GABPB2	humanTF
ENSG00000160868.14	ENSG00000143578.15	0.0645781	undirected	CYP3A4	CREB3L4	humanTF
ENSG00000160868.14	ENSG00000263001.5	0.0644608	undirected	CYP3A4	GTF2I	humanTF
ENSG00000160868.14	ENSG00000127124.14	0.0643889	undirected	CYP3A4	HIVEP3	humanTF
ENSG00000160868.14	ENSG00000164011.17	0.0637374	undirected	CYP3A4	ZNF691	humanTF
ENSG00000160868.14	ENSG00000197566.9	0.0634771	undirected	CYP3A4	ZNF624	humanTF
ENSG00000160868.14	ENSG00000221994.10	0.0633837	undirected	CYP3A4	ZNF630	humanTF
ENSG00000160868.14	ENSG00000178150.9	0.0629789	undirected	CYP3A4	ZNF114	humanTF
ENSG00000160868.14	ENSG00000166188.2	0.0627576	undirected	CYP3A4	ZNF319	humanTF
ENSG00000160868.14	ENSG00000159140.19	0.0624223	undirected	CYP3A4	SON	humanTF
ENSG00000160868.14	ENSG00000130684.13	0.0622082	undirected	CYP3A4	ZNF337	humanTF
ENSG00000160868.14	ENSG00000005073.5	0.0621629	undirected	CYP3A4	HOXA11	humanTF
ENSG00000160868.14	ENSG00000019485.13	0.0618827	undirected	CYP3A4	PRDM11	humanTF
ENSG00000160868.14	ENSG00000131849.11	0.061803	undirected	CYP3A4	ZNF132	humanTF
ENSG00000160868.14	ENSG00000167766.18	0.0613356	undirected	CYP3A4	ZNF83	humanTF
ENSG00000160868.14	ENSG00000189164.14	0.060686	undirected	CYP3A4	ZNF527	humanTF
ENSG00000160868.14	ENSG00000196387.9	0.060367	undirected	CYP3A4	ZNF140	humanTF
ENSG00000160868.14	ENSG00000179632.9	0.0597388	undirected	CYP3A4	MAF1	humanTF
ENSG00000160868.14	ENSG00000277462.1	0.0596966	undirected	CYP3A4	ZNF670	humanTF
ENSG00000160868.14	ENSG00000167785.8	0.058787	undirected	CYP3A4	ZNF558	humanTF
ENSG00000160868.14	ENSG00000122859.4	0.0585732	undirected	CYP3A4	NEUROG3	humanTF
ENSG00000160868.14	ENSG00000169057.21	0.05792	undirected	CYP3A4	MECP2	humanTF
ENSG00000160868.14	ENSG00000198429.9	0.0577875	undirected	CYP3A4	ZNF69	humanTF
ENSG00000160868.14	ENSG00000127081.13	0.0573998	undirected	CYP3A4	ZNF484	humanTF
ENSG00000160868.14	ENSG00000198740.8	0.056803	undirected	CYP3A4	ZNF652	humanTF
ENSG00000160868.14	ENSG00000152439.12	0.0564804	undirected	CYP3A4	ZNF773	humanTF
ENSG00000160868.14	ENSG00000174428.16	0.0555805	undirected	CYP3A4	GTF2IRD2B	humanTF
ENSG00000160868.14	ENSG00000187187.13	0.0550085	undirected	CYP3A4	ZNF546	humanTF
ENSG00000160868.14	ENSG00000153207.14	0.0540237	undirected	CYP3A4	AHCTF1	humanTF
ENSG00000160868.14	ENSG00000204611.6	0.0529964	undirected	CYP3A4	ZNF616	humanTF
ENSG00000160868.14	ENSG00000270011.6	0.0525672	undirected	CYP3A4	ZNF559-ZNF177	humanTF
ENSG00000160868.14	ENSG00000257591.5	0.0525265	undirected	CYP3A4	ZNF625	humanTF
ENSG00000160868.14	ENSG00000218891.4	0.0520038	undirected	CYP3A4	ZNF579	humanTF
ENSG00000160868.14	ENSG00000030419.16	0.0519671	undirected	CYP3A4	IKZF2	humanTF
ENSG00000160868.14	ENSG00000197024.8	0.0515209	undirected	CYP3A4	ZNF398	humanTF
ENSG00000160868.14	ENSG00000128000.15	0.0514962	undirected	CYP3A4	ZNF780B	humanTF
ENSG00000160868.14	ENSG00000117000.8	0.0513116	undirected	CYP3A4	RLF	humanTF
ENSG00000160868.14	ENSG00000159885.13	0.0508752	undirected	CYP3A4	ZNF222	humanTF
ENSG00000160868.14	ENSG00000168062.9	0.0505266	undirected	CYP3A4	BATF2	humanTF

[truncated: 2 more sheets: k-SI_blue_CYP3A5, l-SI_green_CYP3A7]
