# Supplementary material for: Transcription Factors and ncRNAs Associated with CYP3A Expression in Human Liver and Small Intestine Assessed with Weighted Gene Co-Expression Network Analysis
Source: Biomedicines. 2022 Nov 28;10(12):3061. doi: 10.3390/biomedicines10123061 (PMC9775998; doi:10.3390/biomedicines10123061)
Supplement: Supplementary file 1 [file biomedicines-10-03061-s001.zip › Table S2.xlsx]

## Sheet: Turquosie module in group 1
Table S2-1: Correlation between potential regulators (TFs and ncRNAs) and 3 CYP3As' expression of turquosie module in group 1. (bold: p<1.67e-3, Bonferroni corrected p cutoff (0.05/(90*3)))
ENSEMBL	Regulators's type	Regulators	CYP3A4	CYP3A5	CYP3A7
ENSG00000250436	lncRNA	LINC02499	0.51 (3e-14)	0.63 (5e-23)	0.49 (5e-13)
ENSG00000228923	lncRNA	AP000355.2	0.46 (2e-11)	0.59 (1e-19)	0.4 (9e-09)
ENSG00000274225	lncRNA	KB-68A7.1	0.53 (5e-15)	0.57 (6e-18)	0.48 (2e-12)
ENSG00000228170	lncRNA	RP1-40E16.11	0.52 (2e-14)	0.56 (2e-17)	0.46 (2e-11)
ENSG00000279428	lncRNA	RP11-258F1.2	0.52 (2e-14)	0.56 (4e-17)	0.42 (1e-09)
ENSG00000225756	lncRNA	DBH-AS1	0.42 (9e-10)	0.56 (5e-17)	0.33 (3e-06)
ENSG00000229005	lncRNA	HNF4A-AS1	0.62 (9e-22)	0.55 (2e-16)	0.49 (3e-13)
ENSG00000279108	lncRNA	CTC-490E21.11	0.61 (2e-21)	0.52 (6e-15)	0.45 (7e-11)
ENSG00000247903	lncRNA	RP11-421F16.3	0.47 (3e-12)	0.51 (2e-14)	0.5 (1e-13)
ENSG00000272909	lncRNA	CTD-2555O16.4	0.4 (1e-08)	0.5 (1e-13)	0.26 (2e-04)
ENSG00000207926	miRNA	MIR135A1	0.49 (4e-13)	0.5 (2e-13)	0.32 (8e-06)
ENSG00000262881	lncRNA	RP11-669E14.4	0.52 (5e-15)	0.49 (8e-13)	0.51 (6e-14)
ENSG00000230435	lncRNA	AC004160.4	0.57 (9e-18)	0.48 (1e-12)	0.35 (7e-07)
ENSG00000232667	lncRNA	AC004862.6	0.55 (7e-17)	0.48 (1e-12)	0.35 (4e-07)
ENSG00000261469	lncRNA	RP11-96D1.6	0.49 (5e-13)	0.48 (2e-12)	0.35 (4e-07)
ENSG00000261058	lncRNA	RP11-252E2.2	0.59 (2e-19)	0.48 (3e-12)	0.43 (6e-10)
ENSG00000226699	lncRNA	RP11-122K13.7	0.47 (8e-12)	0.47 (4e-12)	0.37 (1e-07)
ENSG00000223991	lncRNA	AC104809.2	0.41 (2e-09)	0.47 (6e-12)	0.48 (2e-12)
ENSG00000230333	lncRNA	AC004538.3	0.54 (4e-16)	0.47 (7e-12)	0.41 (2e-09)
ENSG00000272732	lncRNA	RP5-1159O4.2	0.41 (3e-09)	0.47 (8e-12)	0.31 (8e-06)
ENSG00000257702	lncRNA	LBX2-AS1	0.47 (7e-12)	0.47 (9e-12)	0.36 (3e-07)
ENSG00000233376	lncRNA	RP5-881L22.6	0.53 (2e-15)	0.43 (4e-10)	0.4 (5e-09)
ENSG00000278058	lncRNA	RP11-70D24.2	0.45 (8e-11)	0.42 (9e-10)	0.33 (3e-06)
ENSG00000275897	lncRNA	RP11-94C24.13	0.49 (3e-13)	0.42 (2e-09)	0.36 (3e-07)
ENSG00000253196	lncRNA	RP11-706C16.7	0.48 (2e-12)	0.41 (4e-09)	0.45 (6e-11)
ENSG00000279218	lncRNA	RP11-263G22.1	0.43 (6e-10)	0.41 (5e-09)	0.42 (2e-09)
ENSG00000279372	lncRNA	RP11-1182P23.5	0.55 (1e-16)	0.4 (6e-09)	0.38 (5e-08)
ENSG00000260196	lncRNA	RP1-239B22.5	-0.44 (2e-10)	-0.41 (4e-09)	-0.31 (8e-06)
ENSG00000262995	lncRNA	CTD-2194A8.2	0.47 (4e-12)	0.4 (1e-08)	0.31 (1e-05)
ENSG00000254607	lncRNA	LOC101929427	0.48 (2e-12)	0.39 (1e-08)	0.4 (1e-08)
ENSG00000275944	lncRNA	RP11-104J23.1	0.4 (1e-08)	0.39 (1e-08)	0.32 (5e-06)
ENSG00000276075	lncRNA	AC027682.6	0.43 (4e-10)	0.39 (2e-08)	0.46 (2e-11)
ENSG00000275025	lncRNA	RP5-875H18.10	0.45 (7e-11)	0.38 (4e-08)	0.4 (1e-08)
ENSG00000260500	lncRNA	CTD-3193O13.1	0.37 (2e-07)	0.38 (4e-08)	0.32 (8e-06)
ENSG00000250696	lncRNA	LOC105377267	0.38 (3e-08)	0.38 (5e-08)	0.42 (1e-09)
ENSG00000250764	lncRNA	CTD-2152M20.2	-0.44 (1e-10)	-0.38 (6e-08)	-0.47 (4e-12)
ENSG00000272583	lncRNA	RP11-344P13.6	0.43 (5e-10)	0.37 (1e-07)	0.35 (8e-07)
ENSG00000258604	lncRNA	AL161668.5	0.43 (3e-10)	0.37 (2e-07)	0.3 (2e-05)
ENSG00000272129	lncRNA	RP11-250B2.6	0.53 (4e-15)	0.36 (2e-07)	0.38 (6e-08)
ENSG00000279317	lncRNA	AC006994.2	0.48 (1e-12)	0.36 (3e-07)	0.37 (1e-07)
ENSG00000251637	lncRNA	RP11-119D9.1	0.58 (5e-19)	0.35 (5e-07)	0.41 (3e-09)
ENSG00000264569	lncRNA	DCXR-DT	0.44 (1e-10)	0.35 (5e-07)	0.28 (8e-05)
ENSG00000273151	lncRNA	RP11-449P15.2	0.44 (2e-10)	0.35 (8e-07)	0.38 (3e-08)
ENSG00000279619	lncRNA	CTD-2527I21.5	0.49 (5e-13)	0.34 (1e-06)	0.38 (5e-08)
ENSG00000272234	lncRNA	CTD-2325A15.5	0.43 (7e-10)	0.33 (2e-06)	0.4 (1e-08)
ENSG00000197099	lncRNA	RP11-573D15.8	0.37 (2e-07)	0.32 (6e-06)	0.33 (3e-06)
ENSG00000278965	lncRNA	RP11-39H3.2	0.41 (4e-09)	0.32 (8e-06)	0.36 (3e-07)
ENSG00000225313	lncRNA	RP11-415J8.3	-0.37 (2e-07)	-0.24 (8e-04)	-0.42 (2e-09)
ENSG00000229525	lncRNA	AC053503.4	0.35 (6e-07)	0.24 (8e-04)	0.33 (3e-06)
ENSG00000243230	lncRNA	RP11-286H14.8	0.31 (9e-06)	0.3 (3e-05)	0.32 (6e-06)
ENSG00000144852	TF	NR1I2	0.54 (3e-16)	0.61 (3e-21)	0.42 (2e-09)
ENSG00000107175	TF	CREB3	-0.5 (1e-13)	-0.57 (3e-18)	-0.38 (5e-08)
ENSG00000197905	TF	TEAD4	-0.6 (2e-20)	-0.56 (2e-17)	-0.45 (6e-11)
ENSG00000144331	TF	ZNF385B	0.59 (4e-19)	0.56 (4e-17)	0.46 (1e-11)
ENSG00000108924	TF	HLF	0.58 (2e-18)	0.56 (4e-17)	0.37 (1e-07)
ENSG00000162599	TF	NFIA	0.59 (8e-20)	0.55 (8e-17)	0.44 (9e-11)
ENSG00000143257	TF	NR1I3	0.54 (1e-15)	0.55 (1e-16)	0.38 (6e-08)
ENSG00000125520	TF	SLC2A4RG	0.55 (2e-16)	0.54 (3e-16)	0.43 (3e-10)
ENSG00000029153	TF	ARNTL2	-0.53 (1e-15)	-0.53 (4e-15)	-0.45 (5e-11)
ENSG00000005436	TF	GCFC2	0.51 (2e-14)	0.52 (6e-15)	0.45 (6e-11)
ENSG00000100644	TF	HIF1A	-0.5 (1e-13)	-0.52 (6e-15)	-0.48 (3e-12)
ENSG00000118922	TF	KLF12	0.52 (9e-15)	0.52 (1e-14)	0.41 (2e-09)
ENSG00000029993	TF	HMGB3	-0.49 (9e-13)	-0.51 (2e-14)	-0.38 (4e-08)
ENSG00000167491	TF	GATAD2A	-0.49 (6e-13)	-0.51 (3e-14)	-0.48 (2e-12)
ENSG00000172493	TF	AFF1	0.5 (1e-13)	0.51 (4e-14)	0.41 (5e-09)
ENSG00000197114	TF	ZGPAT	0.59 (7e-20)	0.51 (6e-14)	0.49 (8e-13)
ENSG00000184517	TF	ZFP1	0.6 (1e-20)	0.49 (5e-13)	0.46 (1e-11)
ENSG00000032219	TF	ARID4A	0.48 (1e-12)	0.49 (5e-13)	0.43 (7e-10)
ENSG00000074219	TF	TEAD2	-0.62 (8e-22)	-0.48 (1e-12)	-0.46 (1e-11)
ENSG00000196693	TF	ZNF33B	0.46 (3e-11)	0.48 (1e-12)	0.34 (1e-06)
ENSG00000091831	TF	ESR1	0.59 (3e-19)	0.47 (5e-12)	0.43 (3e-10)
ENSG00000066136	TF	NFYC	0.4 (6e-09)	0.47 (6e-12)	0.42 (1e-09)
ENSG00000189403	TF	HMGB1	0.45 (5e-11)	0.46 (2e-11)	0.32 (5e-06)
ENSG00000100105	TF	PATZ1	0.54 (6e-16)	0.45 (3e-11)	0.4 (8e-09)
ENSG00000143365	TF	RORC	0.45 (5e-11)	0.45 (5e-11)	0.33 (3e-06)
ENSG00000060138	TF	YBX3	-0.47 (8e-12)	-0.45 (6e-11)	-0.34 (1e-06)
ENSG00000060566	TF	CREB3L3	-0.52 (7e-15)	-0.45 (8e-11)	-0.45 (8e-11)
ENSG00000156127	TF	BATF	-0.46 (2e-11)	-0.45 (8e-11)	-0.26 (2e-04)
ENSG00000205143	TF	ARID3C	0.52 (1e-14)	0.44 (1e-10)	0.46 (3e-11)
ENSG00000151623	TF	NR3C2	0.55 (3e-16)	0.44 (2e-10)	0.44 (1e-10)
ENSG00000188313	TF	PLSCR1	-0.45 (6e-11)	-0.44 (2e-10)	-0.41 (3e-09)
ENSG00000243678	TF	NME2	-0.59 (2e-19)	-0.43 (5e-10)	-0.41 (5e-09)
ENSG00000138380	TF	CARF	0.42 (2e-09)	0.43 (5e-10)	0.37 (1e-07)
ENSG00000169083	TF	AR	0.55 (1e-16)	0.42 (1e-09)	0.34 (9e-07)
ENSG00000173041	TF	ZNF680	0.44 (1e-10)	0.4 (9e-09)	0.35 (6e-07)
ENSG00000116990	TF	MYCL	0.42 (7e-10)	0.4 (9e-09)	0.34 (1e-06)
ENSG00000114853	TF	ZBTB47	-0.45 (7e-11)	-0.39 (2e-08)	-0.48 (1e-12)
ENSG00000175727	TF	MLXIP	-0.5 (2e-13)	-0.39 (2e-08)	-0.47 (5e-12)
ENSG00000142528	TF	ZNF473	-0.38 (7e-08)	-0.39 (2e-08)	-0.42 (2e-09)
ENSG00000105516	TF	DBP	0.44 (3e-10)	0.39 (3e-08)	0.38 (4e-08)
The top 80 regulators of each CYP3A are shown, and the number of overlaps of the top 80 regulators of 3 CYP3As is 90. For each cell, the number outside the bracket represents the correlation coefficient, and the number inside the bracket represents the p-value.

## Sheet: Turquosie module in group 2
Table S2-2: Correlation between potential regulators (TFs and ncRNAs) and 2 CYP3As' expression of turquosie module in group 2. (bold: p<2.69e-4, Bonferroni corrected p cutoff (0.05/(93*2)))
ENSEMBL	Regulators's type	Regulators	CYP3A4	CYP3A5
ENSG00000229719	lncRNA	MIR194-2HG	0.85 (5e-51)	0.96 (1e-98)
ENSG00000235523	lncRNA	RP11-63P12.7	0.9 (6e-66)	0.93 (9e-78)
ENSG00000279693	lncRNA	RP11-71L14.3	0.87 (2e-54)	0.92 (2e-74)
ENSG00000261183	lncRNA	SPINT1-AS1	0.8 (3e-40)	0.91 (9e-70)
ENSG00000275234	lncRNA	CTD-2396E7.11	0.79 (7e-38)	0.91 (4e-69)
ENSG00000224721	lncRNA	LOC102724153	0.91 (2e-66)	0.91 (4e-67)
ENSG00000272068	lncRNA	RP11-284F21.9	0.8 (1e-39)	0.9 (8e-65)
ENSG00000261286	lncRNA	ATP2C2-AS1	0.75 (3e-32)	0.9 (5e-64)
ENSG00000232354	lncRNA	VIPR1-AS1	0.82 (9e-44)	0.89 (2e-62)
ENSG00000222001	lncRNA	LOC101928881	0.8 (2e-40)	0.89 (2e-62)
ENSG00000261488	lncRNA	TBILA	0.77 (4e-36)	0.89 (1e-59)
ENSG00000257084	lncRNA	MIR200CHG	0.72 (5e-29)	0.89 (2e-59)
ENSG00000272405	lncRNA	RP11-284F21.10	0.75 (1e-32)	0.88 (4e-59)
ENSG00000282221	lncRNA	RP11-27G14.4	0.82 (7e-43)	0.88 (8e-59)
ENSG00000235029	lncRNA	MNX1-AS2	0.73 (3e-30)	0.88 (1e-56)
ENSG00000278912	lncRNA	CTD-2196E14.8	0.71 (2e-28)	0.88 (1e-56)
ENSG00000272141	lncRNA	RP11-465B22.8	0.67 (1e-24)	0.88 (1e-56)
ENSG00000205890	lncRNA	LOC100128770	0.78 (2e-36)	0.87 (3e-55)
ENSG00000263893	lncRNA	CTD-3010D24.3	0.82 (8e-44)	0.87 (6e-55)
ENSG00000279017	lncRNA	RP11-697K23.3	0.83 (6e-46)	0.87 (2e-54)
ENSG00000260418	lncRNA	RP3-406A7.7	0.75 (5e-33)	0.87 (4e-54)
ENSG00000261116	lncRNA	RP3-523K23.2	0.7 (4e-27)	0.86 (2e-53)
ENSG00000273971	lncRNA	RP11-77K12.10	0.8 (2e-40)	0.86 (4e-53)
ENSG00000269915	lncRNA	AP006621.9	0.81 (2e-41)	0.86 (8e-53)
ENSG00000260593	lncRNA	RP11-432I5.2	0.76 (7e-35)	0.86 (1e-52)
ENSG00000272763	lncRNA	RP11-357H14.17	0.7 (1e-26)	0.86 (8e-52)
ENSG00000254988	lncRNA	CTD-2547H18.1	0.74 (6e-32)	0.86 (2e-51)
ENSG00000279756	lncRNA	CTD-2385L22.2	0.79 (2e-38)	0.86 (3e-51)
ENSG00000204588	lncRNA	LINC01123	0.72 (1e-28)	0.85 (6e-51)
ENSG00000274993	lncRNA	LOC105375431	0.74 (1e-31)	0.85 (8e-51)
ENSG00000251169	lncRNA	LINC01843	0.77 (2e-35)	0.85 (4e-50)
ENSG00000272079	lncRNA	LA16c-380H5.5	0.71 (1e-28)	0.85 (5e-50)
ENSG00000253696	lncRNA	KBTBD11-OT1	0.8 (2e-40)	0.85 (1e-49)
ENSG00000254290	lncRNA	RP11-150O12.3	0.73 (2e-30)	0.84 (3e-48)
ENSG00000229953	lncRNA	RP11-284F21.7	0.75 (1e-32)	0.84 (6e-48)
ENSG00000255474	lncRNA	GAU1	0.68 (6e-25)	0.84 (7e-48)
ENSG00000224093	lncRNA	RP5-1033H22.2	0.69 (2e-26)	0.84 (2e-47)
ENSG00000237476	lncRNA	LINC01637	0.71 (1e-28)	0.84 (4e-47)
ENSG00000258474	lncRNA	LINC02313	0.75 (2e-33)	0.83 (4e-46)
ENSG00000260704	lncRNA	LINC00543	0.73 (8e-31)	0.83 (1e-45)
ENSG00000278385	lncRNA	RP11-89H19.2	0.69 (1e-26)	0.82 (2e-44)
ENSG00000260996	lncRNA	RP13-122B23.8	0.74 (3e-31)	0.82 (6e-44)
ENSG00000229005	lncRNA	HNF4A-AS1	0.85 (4e-49)	0.82 (5e-43)
ENSG00000249007	lncRNA	RP11-510N19.5	0.61 (3e-19)	0.81 (1e-42)
ENSG00000259230	lncRNA	LINC02323	0.74 (8e-32)	0.81 (3e-42)
ENSG00000274173	lncRNA	RP4-568C11.4	0.65 (4e-22)	0.81 (3e-42)
ENSG00000249453	lncRNA	RP13-497K6.1	0.71 (1e-28)	0.8 (2e-39)
ENSG00000234155	lncRNA	LINC02535	0.69 (4e-26)	0.8 (2e-39)
ENSG00000270403	lncRNA	RP11-35P15.1	0.75 (2e-33)	0.79 (4e-39)
ENSG00000216560	lncRNA	LINC00955	0.78 (1e-36)	0.78 (4e-37)
ENSG00000249685	lncRNA	RP11-360F5.3	-0.62 (4e-20)	-0.69 (8e-26)
ENSG00000276633	lncRNA	AJ011931.1	-0.53 (6e-14)	-0.56 (4e-16)
ENSG00000144852	TF	NR1I2	0.88 (3e-59)	0.96 (5e-94)
ENSG00000164749	TF	HNF4G	0.87 (2e-55)	0.95 (2e-86)
ENSG00000166268	TF	MYRFL	0.86 (8e-52)	0.95 (5e-86)
ENSG00000275410	TF	HNF1B	0.8 (3e-40)	0.94 (2e-82)
ENSG00000175329	TF	ISX	0.83 (2e-46)	0.94 (4e-84)
ENSG00000135100	TF	HNF1A	0.84 (4e-48)	0.93 (3e-79)
ENSG00000101076	TF	HNF4A	0.8 (6e-40)	0.93 (8e-79)
ENSG00000130700	TF	GATA5	0.83 (1e-45)	0.93 (2e-75)
ENSG00000012504	TF	NR1H4	0.82 (4e-44)	0.92 (9e-73)
ENSG00000060566	TF	CREB3L3	0.9 (1e-64)	0.92 (1e-71)
ENSG00000102554	TF	KLF5	0.76 (1e-34)	0.92 (3e-71)
ENSG00000124920	TF	MYRF	0.79 (5e-38)	0.92 (1e-70)
ENSG00000111424	TF	VDR	0.77 (5e-36)	0.91 (1e-69)
ENSG00000117595	TF	IRF6	0.77 (5e-36)	0.91 (1e-68)
ENSG00000043039	TF	BARX2	0.78 (2e-37)	0.91 (5e-68)
ENSG00000188242	TF	PP7080	0.88 (1e-58)	0.91 (2e-67)
ENSG00000173153	TF	ESRRA	0.82 (3e-43)	0.91 (2e-66)
ENSG00000116833	TF	NR5A2	0.8 (2e-39)	0.9 (3e-65)
ENSG00000172818	TF	OVOL1	0.79 (1e-38)	0.9 (3e-65)
ENSG00000165556	TF	CDX2	0.75 (4e-33)	0.9 (4e-65)
ENSG00000125850	TF	OVOL2	0.77 (5e-36)	0.9 (2e-64)
ENSG00000172238	TF	ATOH1	0.76 (1e-34)	0.9 (5e-64)
ENSG00000130675	TF	MNX1	0.71 (2e-28)	0.89 (4e-61)
ENSG00000160685	TF	ZBTB7B	0.88 (2e-58)	0.89 (8e-61)
ENSG00000083307	TF	GRHL2	0.72 (6e-29)	0.88 (9e-59)
ENSG00000141448	TF	GATA6	0.81 (3e-41)	0.88 (5e-58)
ENSG00000124664	TF	SPDEF	0.72 (5e-29)	0.88 (2e-57)
ENSG00000113722	TF	CDX1	0.71 (1e-27)	0.88 (2e-57)
ENSG00000163435	TF	ELF3	0.7 (2e-27)	0.88 (2e-57)
ENSG00000132024	TF	CC2D1A	0.8 (8e-41)	0.88 (1e-56)
ENSG00000167800	TF	TBX10	0.83 (1e-46)	0.87 (2e-54)
ENSG00000265763	TF	ZNF488	0.84 (7e-47)	0.87 (3e-54)
ENSG00000009950	TF	MLXIPL	0.75 (2e-32)	0.85 (7e-50)
ENSG00000108788	TF	MLX	0.76 (7e-35)	0.85 (6e-49)
ENSG00000129514	TF	FOXA1	0.68 (8e-25)	0.84 (1e-48)
ENSG00000103460	TF	TOX3	0.73 (1e-30)	0.84 (7e-48)
ENSG00000170608	TF	FOXA3	0.66 (3e-23)	0.84 (1e-47)
ENSG00000119042	TF	SATB2	0.76 (1e-33)	0.83 (4e-45)
ENSG00000153814	TF	JAZF1	-0.72 (8e-29)	-0.82 (2e-44)
ENSG00000131910	TF	NR0B2	0.73 (6e-30)	0.79 (1e-38)
ENSG00000116793	TF	PHTF1	-0.62 (4e-20)	-0.68 (1e-24)
The top 80 regulators of each CYP3A are shown, and the number of overlaps of the top 80 regulators of CYP3A4 and 3A5 is 93. For each cell, the number outside the bracket represents the correlation coefficient, and the number inside the bracket represents the p-value.

## Sheet: Red module in group 2
Table S2-3: Correlation between potential regulators (TFs and ncRNAs) and CYP3A7 expression of red module in group 2. (bold: p<6.25e-4, Bonferroni corrected p cutoff (0.05/80))
ENSEMBL	Regulators' type	Regulators	CYP3A7
ENSG00000224057	lncRNA	EGFR-AS1	0.78 (9e-38)
ENSG00000224417	lncRNA	RP11-503C24.6	0.77 (2e-35)
ENSG00000275897	lncRNA	RP11-94C24.13	0.75 (2e-33)
ENSG00000247699	lncRNA	CTB-127C13.1	0.75 (9e-33)
ENSG00000236384	lncRNA	LINC00479	0.75 (2e-32)
ENSG00000255478	lncRNA	RP11-867O8.5	0.74 (8e-32)
ENSG00000256802	lncRNA	LOC100130111	0.74 (9e-32)
ENSG00000244137	lncRNA	RP11-99J16__A.2	0.74 (4e-31)
ENSG00000250497	lncRNA	AC007126.1	0.72 (9e-30)
ENSG00000264125	lncRNA	RP11-354P11.4	0.72 (4e-29)
ENSG00000228204	lncRNA	RP4-724E13.2	0.71 (1e-27)
ENSG00000224090	lncRNA	LOC100129175	0.7 (6e-27)
ENSG00000255120	lncRNA	OVOL1-AS1	0.7 (9e-27)
ENSG00000280384	lncRNA	RP4-695O20.1	0.7 (9e-27)
ENSG00000225680	lncRNA	AL163953.2	0.69 (2e-26)
ENSG00000275431	lncRNA	CTB-186H2.3	0.69 (6e-26)
ENSG00000231483	lncRNA	RP11-336A10.5	0.69 (1e-25)
ENSG00000235023	lncRNA	AP001626.2	0.68 (2e-25)
ENSG00000254718	lncRNA	LOC101927702	0.68 (4e-25)
ENSG00000261469	lncRNA	RP11-96D1.6	0.68 (1e-24)
ENSG00000260401	lncRNA	RP11-800A3.4	0.67 (1e-24)
ENSG00000256443	lncRNA	RP11-794G24.1	0.67 (3e-24)
ENSG00000227959	lncRNA	RP11-276H7.2	0.67 (3e-24)
ENSG00000224621	lncRNA	RP11-276H7.3	0.67 (4e-24)
ENSG00000235097	lncRNA	LINC00330	0.67 (5e-24)
ENSG00000226629	lncRNA	LINC00974	0.67 (1e-23)
ENSG00000272088	lncRNA	RP11-168F9.2	0.66 (1e-23)
ENSG00000256643	lncRNA	LINC02441	0.66 (1e-23)
ENSG00000279878	lncRNA	RP11-286N22.16	0.66 (2e-23)
ENSG00000266283	lncRNA	RP11-627G18.1	0.66 (4e-23)
ENSG00000235021	lncRNA	RP11-439E19.7	0.65 (1e-22)
ENSG00000242048	lncRNA	LOC644090	0.65 (4e-22)
ENSG00000234949	lncRNA	LOC105373958	0.65 (5e-22)
ENSG00000258634	lncRNA	RP4-773N10.4	0.65 (5e-22)
ENSG00000235529	lncRNA	AGAP1-IT1	0.64 (2e-21)
ENSG00000227192	lncRNA	RP1-45I4.3	0.64 (4e-21)
ENSG00000272555	lncRNA	RP11-459I19.1	0.63 (9e-21)
ENSG00000233590	lncRNA	RP11-153K11.3	0.63 (1e-20)
ENSG00000280040	lncRNA	RP11-296E3.2	0.63 (2e-20)
ENSG00000214708	lncRNA	LOC105371730	0.62 (1e-19)
ENSG00000258940	lncRNA	LOC100288846	0.62 (1e-19)
ENSG00000280162	lncRNA	RP11-314N13.9	0.61 (2e-19)
ENSG00000228487	lncRNA	RP13-225O21.2	0.61 (3e-19)
ENSG00000223947	lncRNA	AC016738.4	0.61 (4e-19)
ENSG00000234393	lncRNA	RP11-211N11.5	0.61 (6e-19)
ENSG00000212978	lncRNA	LOC339803	-0.6 (8e-19)
ENSG00000225731	lncRNA	AP001627.1	0.6 (1e-18)
ENSG00000250282	lncRNA	RP5-875H18.4	0.59 (5e-18)
ENSG00000279110	lncRNA	CTA-243E7.1	0.59 (1e-17)
ENSG00000266258	lncRNA	LINC01909	0.58 (2e-17)
ENSG00000254003	lncRNA	SRI-AS1	0.58 (2e-17)
ENSG00000276166	lncRNA	CTD-2600O9.2	0.58 (8e-17)
ENSG00000248050	lncRNA	RP11-422N16.3	0.57 (1e-16)
ENSG00000274080	lncRNA	CTA-315H11.2	0.57 (1e-16)
ENSG00000240527	lncRNA	RP11-429G19.3	-0.56 (9e-16)
ENSG00000251533	lncRNA	LINC00605	0.54 (1e-14)
ENSG00000270194	lncRNA	LOC152048	0.54 (2e-14)
ENSG00000267092	lncRNA	CTB-25B13.9	0.51 (4e-13)
ENSG00000148200	TF	NR6A1	0.75 (3e-33)
ENSG00000186951	TF	PPARA	0.75 (3e-32)
ENSG00000171970	TF	ZNF57	0.73 (3e-30)
ENSG00000151623	TF	NR3C2	0.72 (7e-29)
ENSG00000196482	TF	ESRRG	0.68 (3e-25)
ENSG00000110693	TF	SOX6	0.69 (2e-26)
ENSG00000107807	TF	TLX1	0.69 (4e-26)
ENSG00000166349	TF	RAG1	0.67 (4e-24)
ENSG00000178177	TF	LCORL	0.67 (7e-24)
ENSG00000130338	TF	TULP4	0.66 (1e-23)
ENSG00000162664	TF	ZNF326	0.66 (1e-23)
ENSG00000205922	TF	ONECUT3	0.66 (7e-23)
ENSG00000153879	TF	CEBPG	0.64 (1e-21)
ENSG00000179195	TF	ZNF664	0.64 (2e-21)
ENSG00000251493	TF	FOXD1	0.62 (7e-20)
ENSG00000155545	TF	MIER3	0.62 (3e-20)
ENSG00000173757	TF	STAT5B	-0.6 (2e-18)
ENSG00000122034	TF	GTF3A	-0.58 (5e-17)
ENSG00000170485	TF	NPAS2	0.56 (5e-16)
ENSG00000197933	TF	ZNF823	0.52 (9e-14)
ENSG00000168286	TF	THAP11	-0.52 (2e-13)
ENSG00000243943	TF	ZNF512	-0.5 (2e-12)
The top 80 regulators of CYP3A7 are shown. For each cell, the number outside the bracket represents the correlation coefficient, and the number inside the bracket represents the p-value.

## Sheet: Turquosie module in group 3
Table S2-4: Correlation between potential regulators (TFs) and 2 CYP3As' expression of turquosie module in group 3. (bold: p<2.60e-4, Bonferroni corrected p cutoff (0.05/(96*2)))
ENSEMBL	Regulators	CYP3A5	CYP3A7
ENSG00000144852	NR1I2	0.61 (3e-21)	0.42 (2e-09)
ENSG00000107175	CREB3	-0.57 (3e-18)	-0.38 (5e-08)
ENSG00000143257	NR1I3	0.55 (1e-16)	0.38 (6e-08)
ENSG00000125520	SLC2A4RG	0.54 (3e-16)	0.43 (3e-10)
ENSG00000029153	ARNTL2	-0.53 (4e-15)	-0.45 (5e-11)
ENSG00000005436	GCFC2	0.52 (6e-15)	0.45 (6e-11)
ENSG00000100644	HIF1A	-0.52 (6e-15)	-0.48 (3e-12)
ENSG00000160094	ZNF362	0.52 (9e-15)	0.44 (1e-10)
ENSG00000029993	HMGB3	-0.51 (2e-14)	-0.38 (4e-08)
ENSG00000197114	ZGPAT	0.51 (6e-14)	0.49 (8e-13)
ENSG00000182568	SATB1	0.5 (7e-14)	0.34 (1e-06)
ENSG00000095574	IKZF5	0.49 (3e-13)	0.31 (9e-06)
ENSG00000139613	SMARCC2	0.49 (4e-13)	0.32 (8e-06)
ENSG00000117625	RCOR3	0.49 (5e-13)	0.33 (2e-06)
ENSG00000032219	ARID4A	0.49 (5e-13)	0.43 (7e-10)
ENSG00000179922	ZNF784	0.49 (5e-13)	0.37 (8e-08)
ENSG00000196693	ZNF33B	0.48 (1e-12)	0.34 (1e-06)
ENSG00000189180	ZNF33A	0.47 (4e-12)	0.28 (6e-05)
ENSG00000196132	MYT1	-0.47 (5e-12)	-0.39 (2e-08)
ENSG00000189067	LITAF	-0.47 (8e-12)	-0.22 (0.002)
ENSG00000189403	HMGB1	0.46 (2e-11)	0.32 (5e-06)
ENSG00000100105	PATZ1	0.45 (3e-11)	0.4 (8e-09)
ENSG00000167394	ZNF668	-0.45 (5e-11)	-0.41 (5e-09)
ENSG00000143365	RORC	0.45 (5e-11)	0.33 (3e-06)
ENSG00000082641	NFE2L1	0.44 (1e-10)	0.33 (3e-06)
ENSG00000188313	PLSCR1	-0.44 (2e-10)	-0.41 (3e-09)
ENSG00000136169	SETDB2	0.44 (2e-10)	0.27 (2e-04)
ENSG00000159216	RUNX1	-0.43 (4e-10)	-0.28 (7e-05)
ENSG00000243678	NME2	-0.43 (5e-10)	-0.41 (5e-09)
ENSG00000138380	CARF	0.43 (5e-10)	0.37 (1e-07)
ENSG00000147862	NFIB	0.42 (8e-10)	0.36 (2e-07)
ENSG00000121903	ZSCAN20	-0.42 (1e-09)	-0.38 (6e-08)
ENSG00000137309	HMGA1	-0.42 (1e-09)	-0.17 (0.02)
ENSG00000162664	ZNF326	0.41 (3e-09)	0.16 (0.02)
ENSG00000078403	MLLT10	0.41 (4e-09)	0.37 (1e-07)
ENSG00000111424	VDR	-0.41 (4e-09)	-0.33 (3e-06)
ENSG00000124444	ZNF576	-0.41 (4e-09)	-0.3 (2e-05)
ENSG00000129911	KLF16	-0.4 (7e-09)	-0.4 (8e-09)
ENSG00000173041	ZNF680	0.4 (9e-09)	0.35 (6e-07)
ENSG00000116990	MYCL	0.4 (9e-09)	0.34 (1e-06)
ENSG00000114853	ZBTB47	-0.39 (2e-08)	-0.48 (1e-12)
ENSG00000142528	ZNF473	-0.39 (2e-08)	-0.42 (2e-09)
ENSG00000140548	ZNF710	-0.39 (2e-08)	-0.35 (5e-07)
ENSG00000196605	ZNF846	0.39 (2e-08)	0.35 (5e-07)
ENSG00000117010	ZNF684	0.39 (2e-08)	0.33 (3e-06)
ENSG00000101076	HNF4A	0.39 (2e-08)	0.3 (3e-05)
ENSG00000091656	ZFHX4	0.39 (2e-08)	0.25 (4e-04)
ENSG00000105516	DBP	0.39 (3e-08)	0.38 (4e-08)
ENSG00000166478	ZNF143	-0.38 (4e-08)	-0.29 (5e-05)
ENSG00000117713	ARID1A	0.38 (4e-08)	0.23 (0.001)
ENSG00000136936	XPA	0.38 (6e-08)	0.28 (9e-05)
ENSG00000179930	ZNF648	0.38 (8e-08)	0.41 (3e-09)
ENSG00000136630	HLX	0.37 (9e-08)	0.25 (5e-04)
ENSG00000170802	FOXN2	0.37 (1e-07)	0.42 (2e-09)
ENSG00000185278	ZBTB37	0.35 (5e-07)	0.28 (1e-04)
ENSG00000006047	YBX2	0.36 (3e-07)	0.34 (1e-06)
ENSG00000165259	HDX	-0.36 (3e-07)	-0.26 (3e-04)
ENSG00000189420	ZFP92	-0.35 (5e-07)	-0.32 (6e-06)
ENSG00000131910	NR0B2	0.35 (5e-07)	0.27 (2e-04)
ENSG00000196498	NCOR2	-0.35 (6e-07)	-0.43 (6e-10)
ENSG00000189298	ZKSCAN3	0.35 (8e-07)	0.41 (3e-09)
ENSG00000163666	HESX1	0.34 (1e-06)	0.29 (4e-05)
ENSG00000197363	ZNF517	0.34 (1e-06)	0.22 (0.002)
ENSG00000167074	TEF	0.34 (1e-06)	0.21 (0.004)
ENSG00000197054	ZNF763	0.34 (1e-06)	0.2 (0.005)
ENSG00000119725	ZNF410	-0.34 (2e-06)	-0.39 (3e-08)
ENSG00000185947	ZNF267	-0.32 (7e-06)	-0.3 (3e-05)
ENSG00000175592	FOSL1	-0.31 (1e-05)	-0.28 (7e-05)
ENSG00000124782	RREB1	0.31 (1e-05)	0.18 (0.01)
ENSG00000069812	HES2	-0.31 (1e-05)	-0.16 (0.03)
ENSG00000212993	POU5F1B	0.31 (1e-05)	0.11 (0.1)
ENSG00000139445	FOXN4	0.3 (2e-05)	0.41 (5e-09)
ENSG00000181827	RFX7	0.3 (3e-05)	0.29 (5e-05)
ENSG00000171940	ZNF217	-0.3 (3e-05)	-0.29 (5e-05)
ENSG00000137265	IRF4	-0.28 (6e-05)	-0.17 (0.02)
ENSG00000196323	ZBTB44	0.28 (7e-05)	0.25 (5e-04)
ENSG00000151650	VENTX	-0.28 (8e-05)	-0.29 (6e-05)
ENSG00000160113	NR2F6	0.27 (1e-04)	0.17 (0.02)
ENSG00000188868	ZNF563	0.27 (2e-04)	0.21 (0.004)
ENSG00000116016	EPAS1	-0.26 (3e-04)	-0.42 (8e-10)
ENSG00000119547	ONECUT2	0.25 (4e-04)	0.33 (3e-06)
ENSG00000167800	TBX10	0.25 (5e-04)	0.29 (4e-05)
ENSG00000141568	FOXK2	-0.24 (7e-04)	-0.3 (2e-05)
ENSG00000170100	ZNF778	-0.23 (0.001)	-0.46 (1e-11)
ENSG00000112033	PPARD	-0.23 (0.001)	-0.33 (3e-06)
ENSG00000204103	MAFB	0.23 (0.001)	0.3 (3e-05)
ENSG00000172845	SP3	0.23 (0.001)	0.27 (2e-04)
ENSG00000227124	ZNF717	0.23 (0.002)	0.28 (7e-05)
ENSG00000100987	VSX1	-0.23 (0.002)	-0.25 (4e-04)
ENSG00000171574	ZNF584	-0.21 (0.003)	-0.4 (6e-09)
ENSG00000185551	NR2F2	0.21 (0.003)	0.28 (6e-05)
ENSG00000176399	DMRTA1	0.21 (0.003)	0.19 (0.007)
ENSG00000245848	CEBPA	0.19 (0.008)	0.32 (7e-06)
ENSG00000049768	FOXP3	0.19 (0.009)	0.19 (0.009)
ENSG00000070444	MNT	-0.17 (0.02)	-0.32 (5e-06)
ENSG00000164916	FOXK1	-0.11 (0.1)	-0.28 (1e-04)
The top 80 regulators of each CYP3A are shown, and the number of overlaps of the top 80 regulators of CYP3A5 and 3A7 is 96. For each cell, the number outside the bracket represents the correlation coefficient, and the number inside the bracket represents the p-value.

## Sheet: Blue module in group 3
Table S2-5: Correlation between potential regulators (TFs) and CYP3A4 expression of blue module in group 3. (bold: p<6.25e-4, Bonferroni corrected p cutoff (0.05/80))
ENSEMBL	Regulators	CYP3A4
ENSG00000074219	TEAD2	-0.62 (8e-22)
ENSG00000184517	ZFP1	0.6 (1e-20)
ENSG00000197905	TEAD4	-0.6 (2e-20)
ENSG00000162599	NFIA	0.59 (8e-20)
ENSG00000091831	ESR1	0.59 (3e-19)
ENSG00000144331	ZNF385B	0.59 (4e-19)
ENSG00000108924	HLF	0.58 (2e-18)
ENSG00000108509	CAMTA2	-0.56 (5e-17)
ENSG00000169083	AR	0.55 (1e-16)
ENSG00000151623	NR3C2	0.55 (3e-16)
ENSG00000060566	CREB3L3	-0.52 (7e-15)
ENSG00000118922	KLF12	0.52 (9e-15)
ENSG00000205143	ARID3C	0.52 (1e-14)
ENSG00000154655	L3MBTL4	0.5 (7e-14)
ENSG00000172493	AFF1	0.5 (1e-13)
ENSG00000175727	MLXIP	-0.5 (2e-13)
ENSG00000167491	GATAD2A	-0.49 (6e-13)
ENSG00000134532	SOX5	0.49 (8e-13)
ENSG00000134138	MEIS2	-0.48 (9e-13)
ENSG00000197863	ZNF790	0.47 (4e-12)
ENSG00000108175	ZMIZ1	-0.47 (4e-12)
ENSG00000060138	YBX3	-0.47 (8e-12)
ENSG00000156127	BATF	-0.46 (2e-11)
ENSG00000078246	TULP3	-0.45 (6e-11)
ENSG00000140009	ESR2	-0.43 (5e-10)
ENSG00000143437	ARNT	0.42 (1e-09)
ENSG00000068323	TFE3	-0.42 (2e-09)
ENSG00000166349	RAG1	0.41 (3e-09)
ENSG00000197063	MAFG	-0.41 (3e-09)
ENSG00000139083	ETV6	-0.41 (3e-09)
ENSG00000106546	AHR	0.41 (5e-09)
ENSG00000110925	CSRNP2	-0.4 (6e-09)
ENSG00000151090	THRB	0.4 (9e-09)
ENSG00000109787	KLF3	0.4 (1e-08)
ENSG00000131408	NR1H2	-0.4 (1e-08)
ENSG00000104856	RELB	-0.39 (2e-08)
ENSG00000114126	TFDP2	0.39 (3e-08)
ENSG00000125798	FOXA2	0.38 (5e-08)
ENSG00000176542	USF3	0.38 (5e-08)
ENSG00000197013	ZNF429	0.38 (6e-08)
ENSG00000033800	PIAS1	0.38 (6e-08)
ENSG00000083838	ZNF446	-0.38 (7e-08)
ENSG00000123685	BATF3	-0.37 (9e-08)
ENSG00000162702	ZNF281	0.37 (1e-07)
ENSG00000053254	FOXN3	0.37 (1e-07)
ENSG00000171161	ZNF672	-0.37 (2e-07)
ENSG00000164684	ZNF704	0.37 (2e-07)
ENSG00000106536	POU6F2	0.36 (2e-07)
ENSG00000019549	SNAI2	0.36 (3e-07)
ENSG00000106948	AKNA	-0.36 (4e-07)
ENSG00000079432	CIC	-0.36 (4e-07)
ENSG00000178662	CSRNP3	0.35 (4e-07)
ENSG00000128573	FOXP2	0.35 (8e-07)
ENSG00000135547	HEY2	0.34 (9e-07)
ENSG00000174738	NR1D2	0.34 (1e-06)
ENSG00000029639	TFB1M	0.34 (1e-06)
ENSG00000123636	BAZ2B	0.34 (1e-06)
ENSG00000179981	TSHZ1	0.34 (1e-06)
ENSG00000164683	HEY1	-0.34 (1e-06)
ENSG00000198846	TOX	-0.34 (1e-06)
ENSG00000169131	ZNF354A	-0.34 (1e-06)
ENSG00000113916	BCL6	-0.34 (1e-06)
ENSG00000204335	SP5	0.34 (2e-06)
ENSG00000165156	ZHX1	0.33 (3e-06)
ENSG00000077150	NFKB2	-0.33 (3e-06)
ENSG00000101096	NFATC2	0.3 (3e-05)
ENSG00000144218	AFF3	0.3 (3e-05)
ENSG00000186272	ZNF17	0.29 (5e-05)
ENSG00000145908	ZNF300	-0.29 (5e-05)
ENSG00000111087	GLI1	-0.28 (6e-05)
ENSG00000197951	ZNF71	-0.27 (2e-04)
ENSG00000105229	PIAS4	-0.26 (2e-04)
ENSG00000008441	NFIX	0.25 (3e-04)
ENSG00000010030	ETV7	-0.25 (4e-04)
ENSG00000101216	GMEB2	-0.25 (5e-04)
ENSG00000110693	SOX6	0.22 (0.002)
ENSG00000198945	L3MBTL3	0.2 (0.005)
ENSG00000172818	OVOL1	-0.19 (0.007)
ENSG00000213967	ZNF726	0.18 (0.01)
ENSG00000197921	HES5	-0.18 (0.01)
The top 80 regulators of CYP3A4 are shown. For each cell, the number outside the bracket represents the correlation coefficient, and the number inside the bracket represents the p-value.

## Sheet: Blue module in group 4
Table S2-6: Correlation between potential regulators (TFs) and 2 CYP3As' expression of blue module in group 4. (bold: p<2.53e-4, Bonferroni corrected p cutoff (0.05/99*2))
ENSEMBL	Regulators	CYP3A4	CYP3A5
ENSG00000144852	NR1I2	0.88 (3e-59)	0.96 (5e-94)
ENSG00000164749	HNF4G	0.87 (2e-55)	0.95 (2e-86)
ENSG00000166268	MYRFL	0.86 (8e-52)	0.95 (5e-86)
ENSG00000175329	ISX	0.83 (2e-46)	0.94 (4e-84)
ENSG00000275410	HNF1B	0.8 (3e-40)	0.94 (2e-82)
ENSG00000135100	HNF1A	0.84 (4e-48)	0.93 (3e-79)
ENSG00000101076	HNF4A	0.8 (6e-40)	0.93 (8e-79)
ENSG00000130700	GATA5	0.83 (1e-45)	0.93 (2e-75)
ENSG00000012504	NR1H4	0.82 (4e-44)	0.92 (9e-73)
ENSG00000060566	CREB3L3	0.9 (1e-64)	0.92 (1e-71)
ENSG00000102554	KLF5	0.76 (1e-34)	0.92 (3e-71)
ENSG00000124920	MYRF	0.79 (5e-38)	0.92 (1e-70)
ENSG00000111424	VDR	0.77 (5e-36)	0.91 (1e-69)
ENSG00000117595	IRF6	0.77 (5e-36)	0.91 (1e-68)
ENSG00000043039	BARX2	0.78 (2e-37)	0.91 (5e-68)
ENSG00000173153	ESRRA	0.82 (3e-43)	0.91 (2e-66)
ENSG00000116833	NR5A2	0.8 (2e-39)	0.9 (3e-65)
ENSG00000172818	OVOL1	0.79 (1e-38)	0.9 (3e-65)
ENSG00000165556	CDX2	0.75 (4e-33)	0.9 (4e-65)
ENSG00000125850	OVOL2	0.77 (5e-36)	0.9 (2e-64)
ENSG00000172238	ATOH1	0.76 (1e-34)	0.9 (5e-64)
ENSG00000130675	MNX1	0.71 (2e-28)	0.89 (4e-61)
ENSG00000160685	ZBTB7B	0.88 (2e-58)	0.89 (8e-61)
ENSG00000083307	GRHL2	0.72 (6e-29)	0.88 (9e-59)
ENSG00000141448	GATA6	0.81 (3e-41)	0.88 (5e-58)
ENSG00000124664	SPDEF	0.72 (5e-29)	0.88 (2e-57)
ENSG00000113722	CDX1	0.71 (1e-27)	0.88 (2e-57)
ENSG00000163435	ELF3	0.7 (2e-27)	0.88 (2e-57)
ENSG00000132024	CC2D1A	0.8 (8e-41)	0.88 (1e-56)
ENSG00000167800	TBX10	0.83 (1e-46)	0.87 (2e-54)
ENSG00000265763	ZNF488	0.84 (7e-47)	0.87 (3e-54)
ENSG00000009950	MLXIPL	0.75 (2e-32)	0.85 (7e-50)
ENSG00000172819	RARG	-0.81 (6e-42)	-0.85 (2e-49)
ENSG00000108788	MLX	0.76 (7e-35)	0.85 (6e-49)
ENSG00000129514	FOXA1	0.68 (8e-25)	0.84 (1e-48)
ENSG00000204531	POU5F1	0.77 (4e-36)	0.84 (2e-48)
ENSG00000103460	TOX3	0.73 (1e-30)	0.84 (7e-48)
ENSG00000170608	FOXA3	0.66 (3e-23)	0.84 (1e-47)
ENSG00000163497	FEV	0.68 (5e-25)	0.83 (1e-46)
ENSG00000166526	ZNF3	0.76 (8e-35)	0.82 (1e-44)
ENSG00000153814	JAZF1	-0.72 (8e-29)	-0.82 (2e-44)
ENSG00000157613	CREB3L1	0.65 (2e-22)	0.82 (1e-43)
ENSG00000006047	YBX2	0.65 (6e-22)	0.82 (7e-43)
ENSG00000104447	TRPS1	-0.69 (4e-26)	-0.81 (8e-43)
ENSG00000135373	EHF	0.64 (3e-21)	0.81 (1e-42)
ENSG00000160973	FOXH1	0.68 (3e-25)	0.81 (3e-42)
ENSG00000185002	RFX6	0.66 (3e-23)	0.81 (2e-41)
ENSG00000189120	SP6	0.77 (6e-35)	0.8 (5e-41)
ENSG00000205189	ZBTB10	-0.73 (1e-30)	-0.8 (1e-40)
ENSG00000162992	NEUROD1	0.67 (1e-24)	0.8 (2e-40)
ENSG00000059728	MXD1	0.79 (4e-38)	0.8 (3e-40)
ENSG00000174282	ZBTB4	-0.68 (4e-25)	-0.8 (3e-40)
ENSG00000131910	NR0B2	0.73 (6e-30)	0.79 (1e-38)
ENSG00000111145	ELK3	-0.76 (2e-34)	-0.79 (2e-38)
ENSG00000147180	ZNF711	0.73 (6e-30)	0.79 (3e-38)
ENSG00000245848	CEBPA	0.7 (1e-26)	0.78 (2e-37)
ENSG00000169740	ZNF32	-0.69 (6e-26)	-0.78 (2e-37)
ENSG00000069812	HES2	0.68 (1e-24)	0.78 (2e-37)
ENSG00000114439	BBX	-0.66 (5e-23)	-0.78 (4e-37)
ENSG00000139154	AEBP2	-0.67 (3e-24)	-0.77 (3e-36)
ENSG00000152217	SETBP1	-0.66 (2e-23)	-0.77 (3e-36)
ENSG00000131788	PIAS3	-0.71 (2e-28)	-0.77 (4e-36)
ENSG00000171295	ZNF440	0.67 (6e-24)	0.77 (5e-36)
ENSG00000188171	ZNF626	-0.67 (3e-24)	-0.77 (2e-35)
ENSG00000074657	ZNF532	-0.67 (2e-24)	-0.77 (3e-35)
ENSG00000128645	HOXD1	0.7 (9e-27)	0.77 (5e-35)
ENSG00000116132	PRRX1	-0.73 (7e-31)	-0.76 (2e-34)
ENSG00000173039	RELA	-0.66 (2e-23)	-0.76 (2e-34)
ENSG00000185650	ZFP36L1	-0.69 (2e-26)	-0.76 (2e-34)
ENSG00000146676	PURB	-0.65 (4e-22)	-0.76 (2e-34)
ENSG00000126003	PLAGL2	0.75 (5e-33)	0.76 (5e-34)
ENSG00000115355	CCDC88A	-0.69 (1e-25)	-0.76 (6e-34)
ENSG00000125798	FOXA2	0.54 (7e-15)	0.76 (7e-34)
ENSG00000125398	SOX9	0.53 (3e-14)	0.75 (2e-33)
ENSG00000187607	ZNF286A	-0.7 (7e-27)	-0.75 (4e-33)
ENSG00000116990	MYCL	0.63 (6e-21)	0.75 (4e-33)
ENSG00000152784	PRDM8	-0.62 (3e-20)	-0.75 (6e-33)
ENSG00000125482	TTF1	-0.61 (7e-19)	-0.75 (6e-33)
ENSG00000147488	ST18	0.69 (7e-26)	0.75 (7e-33)
ENSG00000175322	ZNF519	-0.67 (2e-24)	-0.75 (3e-32)
ENSG00000178573	MAF	0.68 (1e-25)	0.74 (2e-31)
ENSG00000185252	ZNF74	-0.69 (1e-25)	-0.73 (4e-30)
ENSG00000179528	LBX2	0.68 (8e-25)	0.73 (5e-30)
ENSG00000162714	ZNF496	-0.65 (3e-22)	-0.73 (5e-30)
ENSG00000196793	ZNF239	-0.63 (4e-21)	-0.72 (4e-29)
ENSG00000175745	NR2F1	-0.72 (3e-29)	-0.72 (9e-29)
ENSG00000167635	ZNF146	-0.7 (4e-27)	-0.71 (1e-28)
ENSG00000170689	HOXB9	0.48 (1e-11)	0.71 (2e-28)
ENSG00000152926	ZNF117	-0.63 (4e-21)	-0.71 (6e-28)
ENSG00000169554	ZEB2	-0.76 (1e-34)	-0.71 (8e-28)
ENSG00000137709	POU2F3	0.54 (1e-14)	0.71 (9e-28)
ENSG00000187792	ZNF70	-0.61 (4e-19)	-0.7 (5e-27)
ENSG00000169131	ZNF354A	-0.55 (2e-15)	-0.68 (8e-25)
ENSG00000116793	PHTF1	-0.62 (4e-20)	-0.68 (1e-24)
ENSG00000124613	ZNF391	-0.56 (4e-16)	-0.66 (2e-23)
ENSG00000179388	EGR3	-0.55 (6e-15)	-0.64 (3e-21)
ENSG00000130584	ZBTB46	-0.6 (3e-18)	-0.62 (9e-20)
ENSG00000056277	ZNF280C	-0.48 (3e-11)	-0.59 (5e-18)
ENSG00000128710	HOXD10	-0.46 (1e-10)	-0.52 (2e-13)
The top 80 regulators of each CYP3A are shown, and the number of overlaps of the top 80 regulators of CYP3A4 and 3A5 is 99. For each cell, the number outside the bracket represents the correlation coefficient, and the number inside the bracket represents the p-value.

## Sheet: Green module in group 4
Table S2-7: Correlation between potential regulators (TFs) and CYP3A7 expression of green module in group 4. (bold: p<6.25e-4, Bonferroni corrected p cutoff (0.05/80))
ENSEMBL	Regulators	CYP3A7
ENSG00000148200	NR6A1	0.75 (3e-33)
ENSG00000186951	PPARA	0.75 (3e-32)
ENSG00000171970	ZNF57	0.73 (3e-30)
ENSG00000151623	NR3C2	0.72 (7e-29)
ENSG00000110693	SOX6	0.69 (2e-26)
ENSG00000107807	TLX1	0.69 (4e-26)
ENSG00000119042	SATB2	0.68 (8e-25)
ENSG00000166349	RAG1	0.67 (4e-24)
ENSG00000178177	LCORL	0.67 (7e-24)
ENSG00000162664	ZNF326	0.66 (1e-23)
ENSG00000130338	TULP4	0.66 (1e-23)
ENSG00000205922	ONECUT3	0.66 (7e-23)
ENSG00000143257	NR1I3	0.65 (1e-22)
ENSG00000153879	CEBPG	0.64 (1e-21)
ENSG00000179195	ZNF664	0.64 (2e-21)
ENSG00000196233	LCOR	0.64 (3e-21)
ENSG00000196628	TCF4	-0.64 (4e-21)
ENSG00000155545	MIER3	0.62 (3e-20)
ENSG00000123388	HOXC11	0.62 (5e-20)
ENSG00000007372	PAX6	0.62 (6e-20)
ENSG00000251493	FOXD1	0.62 (7e-20)
ENSG00000125618	PAX8	0.61 (6e-19)
ENSG00000135638	EMX1	0.6 (2e-18)
ENSG00000179774	ATOH7	0.6 (2e-18)
ENSG00000173757	STAT5B	-0.6 (2e-18)
ENSG00000081189	MEF2C	-0.6 (3e-18)
ENSG00000135111	TBX3	0.59 (4e-18)
ENSG00000164330	EBF1	-0.56 (4e-16)
ENSG00000170485	NPAS2	0.56 (5e-16)
ENSG00000243678	NME2	-0.55 (2e-15)
ENSG00000196843	ARID5A	-0.54 (8e-15)
ENSG00000178386	ZNF223	0.54 (9e-15)
ENSG00000150347	ARID5B	-0.53 (5e-14)
ENSG00000102349	KLF8	-0.53 (6e-14)
ENSG00000197933	ZNF823	0.52 (9e-14)
ENSG00000168286	THAP11	-0.52 (2e-13)
ENSG00000077150	NFKB2	-0.51 (4e-13)
ENSG00000180828	BHLHE22	-0.51 (6e-13)
ENSG00000173545	ZNF622	0.51 (8e-13)
ENSG00000189067	LITAF	-0.51 (9e-13)
ENSG00000137166	FOXP4	0.5 (2e-12)
ENSG00000105672	ETV2	0.5 (2e-12)
ENSG00000188321	ZNF559	-0.49 (7e-12)
ENSG00000029639	TFB1M	-0.47 (8e-11)
ENSG00000196345	ZKSCAN7	-0.47 (8e-11)
ENSG00000179627	ZBTB42	0.46 (1e-10)
ENSG00000089902	RCOR1	0.46 (1e-10)
ENSG00000182979	MTA1	-0.46 (2e-10)
ENSG00000187815	ZFP69	-0.45 (3e-10)
ENSG00000213015	ZNF580	-0.45 (4e-10)
ENSG00000136997	MYC	-0.42 (5e-09)
ENSG00000157429	ZNF19	0.42 (5e-09)
ENSG00000172006	ZNF554	0.42 (1e-08)
ENSG00000153560	UBP1	-0.41 (1e-08)
A total of 54 regulators of CYP3A7 are shown. For each cell, the number outside the bracket represents the correlation coefficient, and the number inside the bracket represents the p-value.
