# Supplementary material for: Transcription Factors and ncRNAs Associated with CYP3A Expression in Human Liver and Small Intestine Assessed with Weighted Gene Co-Expression Network Analysis
Source: Biomedicines. 2022 Nov 28;10(12):3061. doi: 10.3390/biomedicines10123061 (PMC9775998; doi:10.3390/biomedicines10123061)
Supplement: Supplementary file 1 [file biomedicines-10-03061-s001.zip › Table S3.XLSX]

## Sheet: Liver_GO
Table S3-1: GO enrichment of liver (group 1).
Tissue	Module	ONTOLOGY	ID	Description	GeneID
liver	turquoise	BP	GO:0044282	small molecule catabolic process	ACOX2/AMACR/PECR/UPB1/SULT1E1/SORD/AADAT/DAO/ECI2/HAAO/ALDH5A1/ASPA/EHHADH/GLYCTK/AKR1D1/ACADL/ADH4/AMT/ACOX1/CYP4A11/ETFBKMT/HOGA1/HNMT/PCK2/HAGH/GSTZ1/DCXR/PKLR/PAH/CYP4F12/IRS1/CYP39A1/ALDH3A2/LDHD/BDH1/IVD/CYP4F2/BDH2/CYP27A1/ACAA1/HADH/ALDH7A1/SARDH/QDPR/IDNK/HAO2/GALM/ACADSB/UROC1/OTC/CRYL1/DPYS/PHYH/ALDOB/GCDH/PRODH2/SULT1A2/XYLB/QPRT/MAT1A/AKR1A1/ENTPD8/GPT/PIPOX/ECHS1/ALDH1L1/HMGCL/TKFC/…
liver	turquoise	BP	GO:0006805	xenobiotic metabolic process	FMO3/BPHL/CMBL/NAT1/GLYAT/BCHE/CYP2C9/ACY3/EPHX2/ACAA1/ACSM2B/GSTA1/NR1I2/CYP2C8/GHR/SULT1A2/PHGDH/RORC/CYP2J2/CES3/GSTA4/CYP2A6/UGT2B15/CYP1A2/CYP46A1/EPHX1/MGST2/SULT1A1/AKR7A2/GSTA2/CYP2C19/MARC1/CYP3A4/GSTM4/UGT2B11/NAT2/HNF4A/CYP3A5/NQO2/CYP2A7/AKR7A3/AS3MT/ARNT/CDO1/CYP2G1P/CYP3A7/CYP2B6/GGT1/CYP1A1/CYP2E1/CYP2A13/ACSM1/UGT1A7/STAT5A/CYB5R3
liver	turquoise	BP	GO:0016054	organic acid catabolic process	ACOX2/AMACR/PECR/SORD/AADAT/DAO/ECI2/HAAO/ALDH5A1/ASPA/EHHADH/AKR1D1/ACADL/AMT/ACOX1/CYP4A11/ETFBKMT/HOGA1/HNMT/PCK2/GSTZ1/DCXR/PAH/CYP4F12/IRS1/CYP39A1/ALDH3A2/LDHD/IVD/CYP4F2/BDH2/ACAA1/HADH/ALDH7A1/SARDH/QDPR/IDNK/HAO2/ACADSB/UROC1/OTC/CRYL1/PHYH/GCDH/PRODH2/XYLB/QPRT/MAT1A/AKR1A1/GPT/PIPOX/ECHS1/ALDH1L1/HMGCL/GCAT/ACAD10/ABHD1/RIDA/SCLY/ACADS/ABHD10/ACACB/MLYCD/CYP4F3/TST/IDO2/PCBD1/HPD/ABCD3…
liver	turquoise	BP	GO:0046395	carboxylic acid catabolic process	ACOX2/AMACR/PECR/SORD/AADAT/DAO/ECI2/HAAO/ALDH5A1/ASPA/EHHADH/AKR1D1/ACADL/AMT/ACOX1/CYP4A11/ETFBKMT/HOGA1/HNMT/PCK2/GSTZ1/DCXR/PAH/CYP4F12/IRS1/CYP39A1/ALDH3A2/LDHD/IVD/CYP4F2/BDH2/ACAA1/HADH/ALDH7A1/SARDH/QDPR/IDNK/HAO2/ACADSB/UROC1/OTC/CRYL1/PHYH/GCDH/PRODH2/XYLB/QPRT/MAT1A/AKR1A1/GPT/PIPOX/ECHS1/ALDH1L1/HMGCL/GCAT/ACAD10/ABHD1/RIDA/SCLY/ACADS/ABHD10/ACACB/MLYCD/CYP4F3/TST/IDO2/PCBD1/HPD/ABCD3…
liver	turquoise	BP	GO:0071466	cellular response to xenobiotic stimulus	FMO3/BPHL/CMBL/NAT1/GLYAT/BCHE/PCK2/CYP2C9/ACY3/EPHX2/ACAA1/ACSM2B/GSTA1/NR1I2/CYP2C8/GHR/SULT1A2/PHGDH/RORC/CYP2J2/CES3/GSTA4/CYP2A6/UGT2B15/CYP1A2/CYP46A1/EPHX1/MGST2/SULT1A1/AKR7A2/GSTA2/CYP2C19/MARC1/CYP3A4/GSTM4/SRD5A1/UGT2B11/NAT2/HNF4A/CYP3A5/NQO2/CYP2A7/AKR7A3/AS3MT/ARNT/CDO1/CYP2G1P/CYP3A7/CYP2B6/GGT1/CYP1A1/CYP2E1/CYP2A13/ABCC2/ASS1/ACSM1/TMEM38A/UGT1A7/STAT5A/CYB5R3/ICAM1
liver	turquoise	BP	GO:0006631	fatty acid metabolic process	ACOX2/AMACR/PECR/ECI2/ALDH5A1/EHHADH/ACADL/PRKAB2/ACOX1/CYP4A11/ETFBKMT/CBR4/PCK2/RGN/GSTZ1/CYP2C9/CYP4F12/IRS1/ALDH3A2/IVD/CYP4F2/BDH2/EPHX2/ACAA1/HADH/HAO2/ACSM2A/ACSM2B/ACADSB/ACSF2/HSD17B8/GSTA1/CRYL1/ACSM5/CYP2C8/PHYH/GCDH/PDK2/PTGR2/CYP4V2/DGAT2/ECHS1/CBR1/CYP2J2/ACAD10/ABHD1/GPAM/ZADH2/CYP2A6/CYP1A2/ACADS/PDK4/CYP7A1/CYP2C19/PDP2/ACACB/CYP3A4/GSTM4/SLC45A3/MLYCD/CYP4F3/APOC3/ACOT12/ABCD3/M…
liver	turquoise	BP	GO:1901605	alpha-amino acid metabolic process	IYD/AADAT/DAO/HAAO/ALDH5A1/ASPA/GLYAT/AMT/HOGA1/HNMT/NIT2/BHMT2/GSTZ1/PAH/ART4/ADI1/IVD/ALDH7A1/GATM/SARDH/QDPR/BHMT/UROC1/OTC/GCDH/PRODH2/MAT1A/GPT/PIPOX/HMGCL/PHGDH/GNMT/GCAT/GLYATL1/SEPSECS/RIDA/SCLY/TST/IDO2/PCBD1/HPD/HNF4A/DDAH1/GAMT/CDO1/DCT/PEMT/GGT1/COMT/ASS1/HMGCLL1/CBS/HDC/SHMT2/IL4I1/PYCR1/SDSL/MTHFR/PLOD3/ASNS/BCAT1/ERO1A/PYCR2/PLOD2/SLC6A8/ASRGL1/ATP2B4
liver	turquoise	BP	GO:0006790	sulfur compound metabolic process	SULT1E1/AADAT/ALDH5A1/GLYAT/CBR4/HAGH/BHMT2/GSTZ1/ADI1/SUOX/GSTK1/BHMT/ACSM2A/ACSM2B/ENPP1/ACSF2/HSD17B8/GSTA1/SLC25A10/HMGCS2/IDH1/ACSM5/CHST13/GHR/ABHD14B/GCDH/SULT1A2/MAT1A/PDK2/AKR1A1/DGAT2/PIPOX/HMGCL/PHGDH/SLC26A1/GNMT/B4GAT1/GSTA4/MMACHC/ST3GAL3/MGST2/SULT1A1/MAT2B/PDK4/GSTA2/SOD1/PDP2/ACACB/GSTM4/MLYCD/NAT8/TST/ACOT12/SLC25A1/OPLAH/MCEE/GAMT/CHST7/CDO1/FASN/PEMT/GGT1/NFE2L1/ABCC2/B3GNT2/C…
liver	turquoise	BP	GO:0042737	drug catabolic process	SULT1E1/CAT/AADAT/DAO/FMO4/AMT/PCK2/GSTZ1/CYP2C9/PAH/BDH1/QDPR/NR1I2/DPYS/CYP2C8/SULT1A2/QPRT/PIPOX/CYP2J2/GCAT/RIDA/CYP2A6/CYP1A2/NT5E/SULT1A1/PAOX/DBH/CYP2C19/CYP3A4/CTSH/PCBD1/HPD/OVGP1/CYP3A5/CYP2A7/ADAL/CYP2G1P/CYP2B6/CYP2E1/CYP2A13/ADH7/COMT/IL4I1/GNPDA1/GPX1/SDSL/GPX3/ASRGL1
liver	turquoise	BP	GO:0072329	monocarboxylic acid catabolic process	ACOX2/AMACR/PECR/SORD/ECI2/ALDH5A1/EHHADH/AKR1D1/ACADL/ACOX1/CYP4A11/ETFBKMT/HOGA1/PCK2/DCXR/CYP4F12/IRS1/CYP39A1/ALDH3A2/LDHD/IVD/CYP4F2/BDH2/ACAA1/HADH/IDNK/HAO2/CRYL1/PHYH/GCDH/XYLB/AKR1A1/ECHS1/ACAD10/ABHD1/ACADS/ACACB/MLYCD/CYP4F3/ABCD3/MCEE/ECI1/ECH1/FABP1/PPARD/ASRGL1
liver	turquoise	BP	GO:0006732	coenzyme metabolic process	DHTKD1/AADAT/HAAO/GLYAT/CBR4/PFKFB1/FOLH1/RGN/BHMT2/GSTZ1/DCXR/PKLR/CYP4F2/OGDHL/QDPR/PANK1/ACSM2A/ACSM2B/ASPDH/ACSF2/HSD17B8/HMGCS2/IDH1/ACSM5/ALDOB/SLC23A1/GCDH/QPRT/MAT1A/PDK2/AKR1A1/NADK2/DGAT2/GPD1/PIPOX/ALDH1L1/HMGCL/GNMT/COQ5/NMRK1/NT5E/CBFA2T3/MAT2B/PDK4/PDP2/ACACB/MLYCD/IDO2/PCBD1/ACOT12/SLC46A1/GCK/SLC25A1/GALK1/MCEE/GAMT/ARNT/FASN/PEMT/HTR2A/NMNAT3/SLC19A1/FDXR/ACSM1/ACOT6/PPTC7/INSR/N…
liver	turquoise	BP	GO:0019373	epoxygenase P450 pathway	CYP4A11/CYP2C9/CYP4F12/CYP4F2/EPHX2/CYP2C8/CYP2J2/CYP2A6/CYP1A2/CYP2C19/CYP2A7/CYP2G1P/CYP2B6/CYP1A1/CYP2E1/CYP2A13
liver	turquoise	BP	GO:0046394	carboxylic acid biosynthetic process	ACOX2/AMACR/PECR/DHTKD1/UPB1/FOLH1B/HAAO/ASPA/AKR1D1/ACADL/PRKAB2/HOGA1/CBR4/PFKFB1/FOLH1/RGN/BHMT2/CYP2C9/FGFR4/PKLR/PAH/CYP39A1/ADI1/EPHX2/CYP27A1/OGDHL/GATM/BHMT/ACSM2A/ACSM2B/HSD17B8/OTC/ACSM5/CYP2C8/ALDOB/AKR1A1/GPT/GPD1/CBR1/PHGDH/ABHD1/CYP1A2/CYP46A1/MGST2/CBFA2T3/PDK4/CYP7A1/ACACB/CYP3A4/GSTM4/SLC45A3/MLYCD/APOC3/ACOT12/UGP2/GCK/ABCD3/GALK1/GAMT/ARNT/FADS6/CDO1/FASN/GGT1/CYP1A1/UROS/CYP2E…
liver	turquoise	BP	GO:0034754	cellular hormone metabolic process	ADH6/SULT1E1/ADH1B/AKR1D1/ADH4/ADH1C/CYP2C9/ESR1/HSD17B8/SRD5A2/ADH1A/CYP2C8/TTR/DGAT2/UGT2B7/AFP/RBP4/RDH5/HSD17B14/CYP1A2/CYP46A1/SULT1A1/CYP3A4/ALDH1A1/SRD5A1/UGT2B11/BCO2/CYP3A5/LRAT/CYP3A7/CYP1A1/ADH7/FDXR/COMT/DHRS11/HSD3B1/RDH12/UGT1A7/CYP27C1/ALDH1A3/SCARB1/TSPO/SPP1/CYP21A2
liver	turquoise	BP	GO:0016053	organic acid biosynthetic process	ACOX2/AMACR/PECR/DHTKD1/UPB1/FOLH1B/HAAO/ASPA/AKR1D1/ACADL/PRKAB2/HOGA1/CBR4/PFKFB1/FOLH1/RGN/BHMT2/CYP2C9/FGFR4/PKLR/PAH/CYP39A1/ADI1/EPHX2/CYP27A1/OGDHL/GATM/BHMT/ACSM2A/ACSM2B/HSD17B8/OTC/ACSM5/CYP2C8/ALDOB/AKR1A1/GPT/GPD1/CBR1/PHGDH/ABHD1/CYP1A2/CYP46A1/MGST2/CBFA2T3/PDK4/CYP7A1/ACACB/CYP3A4/GSTM4/SLC45A3/MLYCD/APOC3/ACOT12/UGP2/GCK/ABCD3/GALK1/GAMT/ARNT/FADS6/CDO1/FASN/GGT1/CYP1A1/UROS/CYP2E…
liver	turquoise	BP	GO:0009410	response to xenobiotic stimulus	FMO3/SLC6A1/BPHL/CMBL/NAT1/GLYAT/BCHE/HNMT/PCK2/CYP2C9/ACY3/EPHX2/ACAA1/ACSM2B/F7/GSTA1/NR1I2/HOMER2/CYP2C8/GHR/SULT1A2/PHGDH/RORC/CYP2J2/CES3/GSTA4/DRD1/CYP2A6/UGT2B15/CYP1A2/CYP46A1/EPHX1/MGST2/SULT1A1/AKR7A2/GSTA2/DBH/SOD1/CYP2C19/MARC1/CYP3A4/GSTM4/PTK2B/SRD5A1/UGT2B11/NAT2/HNF4A/CYP3A5/NQO2/CYP2A7/AKR7A3/AS3MT/ARNT/GNAO1/CDO1/CALM3/CYP2G1P/CYP3A7/CYP2B6/GGT1/CYP1A1/CYP2E1/HTR2A/CYP2A13/ABCC2…
liver	turquoise	BP	GO:0008202	steroid metabolic process	ACOX2/AMACR/SEC14L2/SULT1E1/CAT/FAXDC2/AKR1D1/ACADL/CYP2C9/FGFR4/CYP39A1/EPHX2/CYP27A1/ACAA1/ESR1/DHRS4/HSD17B8/SRD5A2/HMGCS2/NR1I2/CYP2C8/CYP3A43/SULT1A2/CYP4V2/DGAT2/UGT2B7/RORC/NFYC/AFP/GPAM/RDH5/CYP2A6/UGT2B15/SORL1/HSD17B14/CYP1A2/CYP46A1/PRLR/SULT1A1/CYP7A1/SOD1/CYP2C19/ACACB/CYP3A4/SRD5A1/HINT2/UGT2B11/SOAT2/APOA1/HSD11B2/CYP3A5/TM7SF2/FASN/CYP3A7/CYP2B6/CYP1A1/CYP2E1/APOA5/ABCB11/NFE2L1/F…
liver	turquoise	BP	GO:0016042	lipid catabolic process	ACOX2/AMACR/PECR/SULT1E1/ECI2/EHHADH/AKR1D1/ACADL/ACOX1/CYP4A11/ETFBKMT/PCK2/GBA3/CYP4F12/IRS1/CYP39A1/ALDH3A2/IVD/CYP4F2/BDH2/CYP27A1/ACAA1/HADH/NAPEPLD/HAO2/IDH1/GPLD1/PHYH/GCDH/ECHS1/FMC1/CES5A/ACAD10/CES3/ABHD1/SORL1/HSD17B14/NEU4/CYP1A2/CYP46A1/PLD1/ACADS/MGST2/CES4A/CYP7A1/PLCG2/ACACB/CYP3A4/SRD5A1/MLYCD/CYP4F3/HINT2/APOC3/BCO2/ABCD3/APOA1/MCEE/ECI1/APOA5/ECH1/PLAAT2/PNPLA3/PLCZ1/APOA2/FABP…
liver	turquoise	BP	GO:0009063	cellular amino acid catabolic process	AADAT/DAO/HAAO/ALDH5A1/ASPA/AMT/HOGA1/HNMT/GSTZ1/PAH/IVD/ALDH7A1/SARDH/QDPR/ACADSB/UROC1/OTC/GCDH/PRODH2/MAT1A/GPT/PIPOX/HMGCL/GCAT/RIDA/SCLY/TST/IDO2/PCBD1/HPD/DDAH1/CDO1/HMGCLL1/CBS/HDC/SHMT2/IL4I1/SDSL/BCAT1/ASRGL1/ATP2B4
liver	turquoise	BP	GO:1901606	alpha-amino acid catabolic process	AADAT/DAO/HAAO/ASPA/AMT/HOGA1/HNMT/GSTZ1/PAH/IVD/ALDH7A1/SARDH/QDPR/UROC1/OTC/GCDH/PRODH2/MAT1A/GPT/PIPOX/HMGCL/GCAT/RIDA/SCLY/IDO2/PCBD1/HPD/DDAH1/CDO1/HMGCLL1/CBS/HDC/SHMT2/IL4I1/SDSL/ASRGL1/ATP2B4
liver	turquoise	BP	GO:0006066	alcohol metabolic process	PECR/ADH6/SEC14L2/SULT1E1/SORD/CAT/ADH1B/AKR1D1/ACADL/ADH4/CBR4/PCK2/MOGAT2/ADH1C/CYP39A1/ALDH3A2/SPHK2/MOGAT1/EPHX2/CYP27A1/QDPR/NAPEPLD/DHRS4/HMGCS2/GPER1/SLC34A1/ADH1A/PLCL2/SULT1A2/TTR/AKR1A1/DGAT2/GPD1/TKFC/NFYC/GPAM/RBP4/RDH5/SORL1/CYP1A2/CYP46A1/SULT1A1/AKR7A2/DBH/CYP7A1/SOD1/PLCG2/ACACB/CYP3A4/ALDH1A1/PTK2B/PCBD1/SOAT2/APOA1/GALK1/TM7SF2/LRAT/FASN/CYP1A1/APOA5/NFE2L1/ADH7/FDXR/PLCZ1/APOA2…
liver	turquoise	BP	GO:0042445	hormone metabolic process	ADH6/SULT1E1/ADH1B/IYD/AKR1D1/ADH4/MME/ADH1C/CYP2C9/SCG5/CYP27A1/ACAA1/ESR1/HSD17B8/SRD5A2/ADH1A/CYP2C8/GHR/TTR/DGAT2/UGT2B7/AFP/RBP4/RDH5/HSD17B14/CYP1A2/CYP46A1/SULT1A1/CYP3A4/ALDH1A1/SRD5A1/DIO1/UGT2B11/BCO2/APOA1/HSD11B2/CYP3A5/ARNT/LRAT/CYP3A7/CYP1A1/ADH7/ACE2/FDXR/COMT/DHRS11/HSD3B1/RDH12/UGT1A7/CYP27C1/ALDH1A3/IL1B/DIO3/SCARB1/TSPO/VDR/SPP1/YWHAH/CYP21A2/HIF1A
liver	turquoise	BP	GO:0006721	terpenoid metabolic process	PECR/ADH6/ADH1B/ADH4/ADH1C/CYP2C9/ALDH3A2/NAPEPLD/HMGCS2/SDC2/ADH1A/CYP2C8/TTR/CYP4V2/DGAT2/RBP4/RDH5/CYP1A2/CYP2C19/CYP3A4/ALDH1A1/SRD5A1/APOM/APOC3/BCO2/APOA1/CYP3A5/LRAT/CYP3A7/CYP1A1/CYP2E1/ADH7/APOA2/RDH12/UGT1A7/CYP27C1/ALDH1A3/GPC2/PPARD
liver	turquoise	BP	GO:0006520	cellular amino acid metabolic process	UPB1/BPHL/FOLH1B/IYD/AADAT/DAO/HAAO/ALDH5A1/ASPA/GLYAT/AMT/HOGA1/HNMT/NIT2/FOLH1/BHMT2/GSTZ1/PAH/ART4/ADI1/IVD/ALDH7A1/GATM/SARDH/QDPR/BHMT/OAZ2/ACADSB/UROC1/OTC/DPYS/GCDH/PRODH2/MAT1A/GPT/PIPOX/HMGCL/PHGDH/GNMT/GCAT/GLYATL1/SEPSECS/RIDA/SCLY/FN3K/TARS2/TST/IDO2/PCBD1/HPD/HNF4A/DDAH1/GAMT/CDO1/DCT/PEMT/GGT1/SLC3A1/COMT/ASS1/HMGCLL1/CBS/HDC/SHMT2/IL4I1/PSMC5/PYCR1/SDSL/MTHFR/PLOD3/ASNS/BCAT1/ERO1A…
liver	turquoise	BP	GO:0051188	cofactor biosynthetic process	ALAD/DHTKD1/HAAO/CBR4/HAGH/PFKFB1/RGN/GSTZ1/PKLR/BDH2/OGDHL/ATP5IF1/QDPR/PANK1/ASPDH/HSD17B8/ALDOB/GCDH/QPRT/MAT1A/PDK2/AKR1A1/NADK2/GPD1/CPOX/MMACHC/COQ5/CYP1A2/NMRK1/MGST2/CBFA2T3/MAT2B/PDK4/SOD1/PDP2/ACACB/MLYCD/IDO2/PCBD1/GCK/SLC25A1/OPLAH/GALK1/ARNT/FASN/FYN/GGT1/CYP1A1/UROS/HTR2A/NMNAT3/NFE2L1/FDXR/MPV17L/PPTC7/INSR/NUP62/CHAC1/ACSBG1/ACSS1/HDAC4/PFKFB4/PANK4/FOXK1/FOXK2/ELOVL1/NUP188/TSPO/…
liver	turquoise	BP	GO:0015711	organic anion transport	SLC6A1/SLC38A3/SLC22A25/SLC38A11/SLC17A4/PRKAB2/SFXN5/CYP4A11/SLC6A13/SLC6A12/SLC10A1/SLC2A2/SLC16A2/CYP4F2/THRSP/SLC22A9/TMEM30B/SFXN2/SLC25A10/CA14/SFXN1/SLCO2B1/SLC23A1/SLC35A3/SLCO1B3/SLC26A1/PCTP/ABCG8/ARL6IP1/SLC17A3/SLC25A23/SLC22A10/SLC38A4/ACACB/SLCO1B7/SLC25A42/APOC3/SLC46A1/SLCO1A2/ABCD3/SLC16A4/SLC25A1/APBA1/APOA1/SLC17A1/SLC35A1/SLC25A20/SLC13A2/SLC16A13/SPX/SLC3A1/SLC19A1/MAP2K6/APO…
liver	turquoise	BP	GO:0015849	organic acid transport	SLC6A1/SLC38A3/SLC38A11/SLC17A4/PRKAB2/SFXN5/CYP4A11/SLC6A13/SLC6A12/SLC10A1/SLC16A2/CYP4F2/THRSP/SLC22A9/SFXN2/SLC25A10/SFXN1/SLCO2B1/SLC23A1/SLCO1B3/SLC26A1/ARL6IP1/SLC17A3/SLC38A4/ACACB/SLCO1B7/SLC46A1/SLCO1A2/ABCD3/SLC16A4/SLC25A1/APBA1/SLC17A1/SLC35A1/SLC25A20/SLC13A2/SLC16A13/SPX/SLC3A1/SLC19A1/MAP2K6/ABCB11/SLC16A12/NFE2L1/ACE2/ABCC2/SLC5A12/SLC16A11/SYT1/FABP1/SLC6A20/SLC26A8/IL1B/GIPC1/P…
liver	turquoise	BP	GO:0046942	carboxylic acid transport	SLC6A1/SLC38A3/SLC38A11/SLC17A4/PRKAB2/SFXN5/CYP4A11/SLC6A13/SLC6A12/SLC10A1/SLC16A2/CYP4F2/THRSP/SLC22A9/SFXN2/SLC25A10/SFXN1/SLCO2B1/SLC23A1/SLCO1B3/SLC26A1/ARL6IP1/SLC17A3/SLC38A4/ACACB/SLCO1B7/SLC46A1/SLCO1A2/ABCD3/SLC16A4/SLC25A1/APBA1/SLC17A1/SLC35A1/SLC25A20/SLC13A2/SLC16A13/SPX/SLC3A1/SLC19A1/MAP2K6/ABCB11/SLC16A12/NFE2L1/ACE2/ABCC2/SLC5A12/SLC16A11/SYT1/FABP1/SLC6A20/SLC26A8/IL1B/GIPC1/P…
liver	turquoise	BP	GO:0019395	fatty acid oxidation	ACOX2/AMACR/PECR/ECI2/EHHADH/ACADL/ACOX1/ETFBKMT/IRS1/ALDH3A2/IVD/BDH2/ACAA1/HADH/HAO2/PHYH/GCDH/CYP4V2/DGAT2/ECHS1/ACAD10/ACADS/PDK4/ACACB/MLYCD/ABCD3/ECI1/ECH1/ADH7/ACSM1/FABP1/APPL2/PPARD
liver	turquoise	BP	GO:0005996	monosaccharide metabolic process	SORD/ALDH5A1/GLYCTK/PCK2/PFKFB1/RGN/DCXR/PKLR/IRS1/FUOM/ENPP1/GALM/SLC25A10/CRYL1/GPLD1/ALDOB/SLC23A1/XYLB/PDK2/AKR1A1/DGAT2/GPD1/UGT2B7/TKFC/RORC/GNMT/RBP4/UGT2B15/GSK3B/ABHD10/PDK4/ACACB/SLC45A3/ALDH1A1/MLYCD/UGT2B11/GCK/OMA1/SLC25A1/GALK1/PPP1R3B/KHK/NFE2L1/OAS1/UGT1A7/FOXA2/SIK1/INSR/DHDH/FUT7/FUT1/CHST1/SLC2A1/RPIA/PFKFB4/GDPGP1/PPARD/FOXK1/FOXK2/CYB5R3/FUT4/HK2/MIDN/PTPN2/PFKP/PHLDA2/ALDOA
liver	turquoise	BP	GO:0006575	cellular modified amino acid metabolic process	DMGDH/IYD/ALDH5A1/ACADL/HOGA1/HAGH/FOLH1/BBOX1/BHMT2/GSTZ1/ALDH7A1/GSTK1/GATM/SARDH/BHMT/GSTA1/IDH1/PIPOX/ALDH1L1/GNMT/GSTA4/MMACHC/MGST2/GSTA2/SOD1/GSTM4/NAT8/DIO1/SLC46A1/OPLAH/GAMT/PEMT/GGT1/SLC19A1/NFE2L1/ASS1/SHMT2/CHAC1/DIO3/GPX1/MTHFR/PLA2G2A/PLOD3/ERO1A/VNN2/SERINC2/PLOD2/SLC6A8/PLSCR1/MTHFD2/MTHFD1L/SLC5A6
liver	turquoise	BP	GO:0030258	lipid modification	ACOX2/AMACR/PECR/ECI2/EHHADH/ACADL/ACOX1/ETFBKMT/IRS1/ALDH3A2/SPHK2/IVD/BDH2/EPHX2/ACAA1/HADH/CYP4A22/HAO2/CYP2C8/PHYH/PIK3R1/GCDH/CYP4V2/DGAT2/ECHS1/ACAD10/ACADS/PDK4/PLPPR1/ACACB/CYP3A4/PIK3C2G/MLYCD/ABCD3/SOAT2/APOA1/CYP3A5/ECI1/CYP3A7/FAM126B/CYP1A1/CYP2E1/APOA5/ECH1/DGKB/ADH7/ACSM1/APOA2/FABP1/B4GALNT1/CISH/APPL2/ST3GAL4/INPP1/PPARD/DGKH/SOCS1/SLC35C1
liver	turquoise	BP	GO:0016101	diterpenoid metabolic process	PECR/ADH6/ADH1B/ADH4/ADH1C/ALDH3A2/NAPEPLD/SDC2/ADH1A/CYP2C8/TTR/CYP4V2/DGAT2/RBP4/RDH5/CYP1A2/CYP3A4/ALDH1A1/SRD5A1/APOM/APOC3/BCO2/APOA1/CYP3A5/LRAT/CYP3A7/CYP1A1/ADH7/APOA2/RDH12/UGT1A7/CYP27C1/ALDH1A3/GPC2/PPARD
liver	turquoise	BP	GO:0007031	peroxisome organization	ACOX2/AMACR/PECR/CAT/PEX11G/DAO/ECI2/EHHADH/ACOX1/EPHX2/ACAA1/GSTK1/HAO2/DHRS4/IDH1/PHYH/PEX14/PIPOX/HMGCL/TMEM135/PAOX/MLYCD/ABCD3/SEC16B/CRYZL2P-SEC16B/PEX16/PEX10/ECH1/MPV17
liver	turquoise	BP	GO:0034440	lipid oxidation	ACOX2/AMACR/PECR/ECI2/EHHADH/ACADL/ACOX1/ETFBKMT/IRS1/ALDH3A2/IVD/BDH2/ACAA1/HADH/HAO2/PHYH/GCDH/CYP4V2/DGAT2/ECHS1/ACAD10/ACADS/PDK4/ACACB/MLYCD/ABCD3/ECI1/ECH1/ADH7/ACSM1/FABP1/APPL2/PPARD
liver	turquoise	BP	GO:0006720	isoprenoid metabolic process	PECR/ADH6/ADH1B/ADH4/ADH1C/CYP2C9/ALDH3A2/NAPEPLD/HMGCS2/SDC2/ADH1A/CYP2C8/PHYH/TTR/CYP4V2/DGAT2/RBP4/RDH5/CYP1A2/CYP2C19/CYP3A4/ALDH1A1/SRD5A1/APOM/APOC3/BCO2/APOA1/CYP3A5/LRAT/CYP3A7/CYP1A1/CYP2E1/ADH7/APOA2/RDH12/UGT1A7/CYP27C1/ALDH1A3/GPC2/PPARD
liver	turquoise	BP	GO:1901568	fatty acid derivative metabolic process	ACOX1/CYP4A11/CBR4/CYP2C9/CYP4F12/BDH1/CYP4F2/BDH2/EPHX2/ACSM2A/HSD17B8/GSTA1/HMGCS2/CYP2C8/GCDH/PTGR2/DGAT2/CBR1/HMGCL/CYP2J2/ZADH2/CYP2A6/CYP1A2/MGST2/CYP2C19/CYP4F3/SLC25A1/CYP2A7/FASN/CYP2G1P/CYP2B6/GGT1/CYP1A1/CYP2E1/CYP2A13/HMGCLL1/PRXL2B/ACSBG1/IL1B/PON2/DAGLA/GPX1/ELOVL1/TNFRSF1A/MAPKAPK2
liver	turquoise	BP	GO:0009062	fatty acid catabolic process	ACOX2/AMACR/PECR/ECI2/EHHADH/ACADL/ACOX1/CYP4A11/ETFBKMT/PCK2/CYP4F12/IRS1/ALDH3A2/IVD/CYP4F2/BDH2/ACAA1/HADH/HAO2/PHYH/GCDH/ECHS1/ACAD10/ABHD1/ACADS/ACACB/MLYCD/CYP4F3/ABCD3/MCEE/ECI1/ECH1/FABP1/PPARD
liver	turquoise	BP	GO:0034308	primary alcohol metabolic process	PECR/ADH6/SULT1E1/ADH1B/ADH4/CBR4/ADH1C/ALDH3A2/NAPEPLD/ADH1A/SULT1A2/TTR/AKR1A1/DGAT2/GPD1/RBP4/RDH5/CYP1A2/SULT1A1/AKR7A2/CYP3A4/ALDH1A1/LRAT/CYP1A1/ADH7/RDH12/CYP27C1/ALDH1A3/ACSS1
liver	turquoise	BP	GO:0044242	cellular lipid catabolic process	ACOX2/AMACR/PECR/ECI2/EHHADH/ACADL/ACOX1/CYP4A11/ETFBKMT/PCK2/GBA3/CYP4F12/IRS1/ALDH3A2/IVD/CYP4F2/BDH2/ACAA1/HADH/NAPEPLD/HAO2/IDH1/GPLD1/PHYH/GCDH/ECHS1/ACAD10/ABHD1/SORL1/NEU4/ACADS/MGST2/PLCG2/ACACB/MLYCD/CYP4F3/APOC3/BCO2/ABCD3/APOA1/MCEE/ECI1/APOA5/ECH1/PNPLA3/APOA2/FABP1/DAGLA/SCARB1/PPARD/SMPD2/ACER2
liver	turquoise	BP	GO:0001523	retinoid metabolic process	ADH6/ADH1B/ADH4/ADH1C/NAPEPLD/SDC2/ADH1A/CYP2C8/TTR/CYP4V2/DGAT2/RBP4/RDH5/CYP1A2/CYP3A4/ALDH1A1/APOM/APOC3/BCO2/APOA1/CYP3A5/LRAT/CYP3A7/CYP1A1/ADH7/APOA2/RDH12/UGT1A7/CYP27C1/ALDH1A3/GPC2/PPARD
liver	turquoise	BP	GO:0072330	monocarboxylic acid biosynthetic process	ACOX2/AMACR/PECR/DHTKD1/AKR1D1/ACADL/PRKAB2/HOGA1/CBR4/PFKFB1/RGN/CYP2C9/FGFR4/PKLR/CYP39A1/EPHX2/CYP27A1/OGDHL/ACSM2A/ACSM2B/HSD17B8/ACSM5/CYP2C8/ALDOB/GPD1/CBR1/ABHD1/CYP1A2/CYP46A1/CBFA2T3/PDK4/CYP7A1/ACACB/CYP3A4/GSTM4/SLC45A3/MLYCD/APOC3/ACOT12/GCK/ABCD3/GALK1/ARNT/FADS6/FASN/CYP1A1/CYP2E1/HTR2A/APOA5/ABCB11/ACSM1/ALDH1A3/PRXL2B/INSR/NUP62/IL1B/ACSS1/HDAC4/PFKFB4/TRIB3/FOXK1/FOXK2/ELOVL1/NUP…
liver	turquoise	BP	GO:0044272	sulfur compound biosynthetic process	CBR4/HAGH/BHMT2/GSTZ1/ADI1/GSTK1/BHMT/HSD17B8/GSTA1/CHST13/GCDH/MAT1A/PDK2/AKR1A1/SLC26A1/B4GAT1/GSTA4/ST3GAL3/MGST2/MAT2B/PDK4/GSTA2/PDP2/ACACB/GSTM4/MLYCD/SLC25A1/OPLAH/CHST7/CDO1/FASN/GGT1/B3GNT2/CBS/ST3GAL6/CHAC1/ACSBG1/NDST1/ST3GAL4/ACSS1/CHST1/MTHFR/ELOVL1/B4GALT5/VCAN/CHPF/B4GALT3
liver	turquoise	BP	GO:0033865	nucleoside bisphosphate metabolic process	SULT1E1/AADAT/GLYAT/CBR4/GSTZ1/PANK1/ACSM2A/ACSM2B/ENPP1/ACSF2/HSD17B8/HMGCS2/ACSM5/ABHD14B/GCDH/SULT1A2/PDK2/DGAT2/PIPOX/HMGCL/SLC26A1/SULT1A1/PDK4/PDP2/ACACB/MLYCD/ACOT12/SLC25A1/MCEE/FASN/ACSM1/ACOT6/SULT4A1/ACSBG1/ACSS1/PANK4/ELOVL1/GPAT4
liver	turquoise	BP	GO:0033875	ribonucleoside bisphosphate metabolic process	SULT1E1/AADAT/GLYAT/CBR4/GSTZ1/PANK1/ACSM2A/ACSM2B/ENPP1/ACSF2/HSD17B8/HMGCS2/ACSM5/ABHD14B/GCDH/SULT1A2/PDK2/DGAT2/PIPOX/HMGCL/SLC26A1/SULT1A1/PDK4/PDP2/ACACB/MLYCD/ACOT12/SLC25A1/MCEE/FASN/ACSM1/ACOT6/SULT4A1/ACSBG1/ACSS1/PANK4/ELOVL1/GPAT4
liver	turquoise	BP	GO:0034032	purine nucleoside bisphosphate metabolic process	SULT1E1/AADAT/GLYAT/CBR4/GSTZ1/PANK1/ACSM2A/ACSM2B/ENPP1/ACSF2/HSD17B8/HMGCS2/ACSM5/ABHD14B/GCDH/SULT1A2/PDK2/DGAT2/PIPOX/HMGCL/SLC26A1/SULT1A1/PDK4/PDP2/ACACB/MLYCD/ACOT12/SLC25A1/MCEE/FASN/ACSM1/ACOT6/SULT4A1/ACSBG1/ACSS1/PANK4/ELOVL1/GPAT4
liver	turquoise	BP	GO:0042572	retinol metabolic process	ADH6/ADH1B/ADH4/ADH1C/ADH1A/TTR/DGAT2/RBP4/RDH5/CYP1A2/CYP3A4/ALDH1A1/LRAT/CYP1A1/ADH7/RDH12/CYP27C1/ALDH1A3
liver	turquoise	BP	GO:0009066	aspartate family amino acid metabolic process	AADAT/ASPA/NIT2/BHMT2/ADI1/ALDH7A1/BHMT/GCDH/MAT1A/PIPOX/PHGDH/GNMT/GCAT/RIDA/ASS1/SDSL/MTHFR/PLOD3/ASNS/PLOD2/ASRGL1
liver	turquoise	BP	GO:0006625	protein targeting to peroxisome	ACOX2/AMACR/PECR/CAT/DAO/ECI2/EHHADH/ACOX1/EPHX2/ACAA1/GSTK1/HAO2/DHRS4/IDH1/PHYH/PEX14/PIPOX/HMGCL/PAOX/MLYCD/PEX16/PEX10/ECH1/MPV17
liver	turquoise	BP	GO:0072662	protein localization to peroxisome	ACOX2/AMACR/PECR/CAT/DAO/ECI2/EHHADH/ACOX1/EPHX2/ACAA1/GSTK1/HAO2/DHRS4/IDH1/PHYH/PEX14/PIPOX/HMGCL/PAOX/MLYCD/PEX16/PEX10/ECH1/MPV17
liver	turquoise	BP	GO:0072663	establishment of protein localization to peroxisome	ACOX2/AMACR/PECR/CAT/DAO/ECI2/EHHADH/ACOX1/EPHX2/ACAA1/GSTK1/HAO2/DHRS4/IDH1/PHYH/PEX14/PIPOX/HMGCL/PAOX/MLYCD/PEX16/PEX10/ECH1/MPV17
liver	turquoise	BP	GO:0043574	peroxisomal transport	ACOX2/AMACR/PECR/CAT/DAO/ECI2/EHHADH/ACOX1/EPHX2/ACAA1/GSTK1/HAO2/DHRS4/IDH1/PHYH/PEX14/PIPOX/HMGCL/PAOX/MLYCD/PEX16/PEX10/ECH1/MPV17
liver	turquoise	BP	GO:1901616	organic hydroxy compound catabolic process	SULT1E1/SORD/AKR1D1/ADH4/CYP4A11/CYP4F12/CYP39A1/LDHD/CYP4F2/CYP27A1/SULT1A2/TKFC/CYP46A1/SULT1A1/DBH/CYP7A1/CYP4F3/LRTOMT/ADH7/COMT/FGF23/DIO3/INPP1/SCARB1/GK
liver	turquoise	BP	GO:0006706	steroid catabolic process	SULT1E1/AKR1D1/CYP39A1/CYP27A1/HSD17B14/CYP1A2/CYP46A1/CYP7A1/CYP3A4/SRD5A1/FGF23/SCARB1/SPP1/YWHAH
liver	turquoise	BP	GO:0019318	hexose metabolic process	SORD/ALDH5A1/GLYCTK/PCK2/PFKFB1/RGN/DCXR/PKLR/IRS1/FUOM/ENPP1/GALM/SLC25A10/GPLD1/ALDOB/PDK2/AKR1A1/DGAT2/GPD1/TKFC/RORC/GNMT/RBP4/GSK3B/PDK4/ACACB/SLC45A3/ALDH1A1/MLYCD/GCK/OMA1/SLC25A1/GALK1/PPP1R3B/KHK/NFE2L1/OAS1/FOXA2/SIK1/INSR/FUT7/FUT1/CHST1/PFKFB4/GDPGP1/PPARD/FOXK1/FOXK2/FUT4/HK2/MIDN/PTPN2/PFKP/PHLDA2/ALDOA
liver	turquoise	BP	GO:0042738	exogenous drug catabolic process	CYP2C9/NR1I2/CYP2C8/CYP2J2/CYP2A6/CYP1A2/CYP2C19/CYP3A4/CYP2A7/CYP2G1P/CYP2B6/CYP2E1/CYP2A13
liver	turquoise	BP	GO:0046365	monosaccharide catabolic process	SORD/GLYCTK/DCXR/PKLR/GALM/CRYL1/ALDOB/XYLB/AKR1A1/TKFC/ALDH1A1/GCK/GALK1/KHK/DHDH/FUT7/FUT1/FOXK1/FOXK2/FUT4/HK2/PFKP/ALDOA
liver	turquoise	BP	GO:0008210	estrogen metabolic process	SULT1E1/CYP2C9/HSD17B8/CYP2C8/HSD17B14/CYP1A2/SULT1A1/CYP3A4/UGT2B11/CYP3A5/CYP3A7/CYP1A1/COMT/DHRS11/HSD3B1
liver	turquoise	BP	GO:0008652	cellular amino acid biosynthetic process	UPB1/FOLH1B/ASPA/FOLH1/BHMT2/PAH/ADI1/GATM/BHMT/OTC/GPT/PHGDH/GAMT/CDO1/GGT1/ASS1/CBS/SHMT2/PYCR1/MTHFR/PLOD3/ASNS/BCAT1/PYCR2/PLOD2/ATP2B4
liver	turquoise	BP	GO:0009108	coenzyme biosynthetic process	DHTKD1/HAAO/CBR4/PFKFB1/RGN/GSTZ1/PKLR/OGDHL/QDPR/PANK1/ASPDH/HSD17B8/ALDOB/GCDH/QPRT/MAT1A/PDK2/AKR1A1/NADK2/GPD1/COQ5/NMRK1/CBFA2T3/MAT2B/PDK4/PDP2/ACACB/MLYCD/IDO2/PCBD1/GCK/SLC25A1/GALK1/ARNT/FASN/HTR2A/NMNAT3/FDXR/PPTC7/INSR/NUP62/ACSBG1/ACSS1/HDAC4/PFKFB4/PANK4/FOXK1/FOXK2/ELOVL1/NUP188/HK2/PFKP/PDXK/HIF1A/ALDOA/MTHFD1L
liver	turquoise	BP	GO:0006766	vitamin metabolic process	HAAO/RGN/CYP4F12/CYP4F2/CYP27A1/ENPP1/SLC23A1/AKR1A1/ALDH1L1/CBR1/MMACHC/TTPA/CLYBL/CYP3A4/SLC46A1/LRAT/CYP1A1/SLC19A1/SNAI2/AMN/ACPP/FGF23/SHMT2/IL1B/MTHFR/SLC2A1/PPARD/CYB5R3/VDR/VNN2/SLC25A19/PDXK/MTHFD2/MTHFD1L/SLC5A6
liver	turquoise	BP	GO:0044262	cellular carbohydrate metabolic process	SORD/PCK2/MOGAT2/PFKFB1/RGN/GYS2/GBA3/IRS1/MOGAT1/IDNK/ENPP1/IDH1/GPER1/GPLD1/XYLB/PDK2/DGAT2/TKFC/RORC/GNMT/GSK3B/CBFA2T3/ABHD10/PDK4/ACACB/SLC45A3/PTK2B/MLYCD/UGP2/GCK/GALK1/PPP1R3B/KHK/GANC/NFE2L1/B3GNT2/TREH/PPP1CC/FOXA2/SIK1/INSR/NDST1/STK40/PHKG1/INPP1/HDAC4/SLC2A1/PFKFB4/FOXK1/FOXK2/B3GNT5/HK2/MIDN/B4GALT5/PTPN2/GK/PHLDA2/EXT1/GYG1
liver	turquoise	BP	GO:0006690	icosanoid metabolic process	ACOX1/CYP4A11/CYP2C9/CYP4F12/CYP4F2/EPHX2/GSTA1/CYP2C8/PTGR2/CBR1/CYP2J2/ZADH2/CYP2A6/CYP1A2/MGST2/CYP2C19/CYP4F3/CYP2A7/CYP2G1P/CYP2B6/GGT1/CYP1A1/CYP2E1/CYP2A13/PRXL2B/IL1B/PON2/DAGLA/GPX1/TNFRSF1A/MAPKAPK2
liver	turquoise	BP	GO:0006635	fatty acid beta-oxidation	ACOX2/AMACR/ECI2/EHHADH/ACADL/ACOX1/ETFBKMT/IRS1/IVD/BDH2/ACAA1/HADH/GCDH/ECHS1/ACAD10/ACADS/ACACB/MLYCD/ABCD3/ECI1/ECH1/FABP1/PPARD
liver	turquoise	BP	GO:0009072	aromatic amino acid family metabolic process	IYD/AADAT/HAAO/HNMT/GSTZ1/PAH/QDPR/UROC1/GCDH/IDO2/PCBD1/HPD/DCT/HDC/IL4I1/ASRGL1
liver	turquoise	BP	GO:0015718	monocarboxylic acid transport	SLC6A1/SLC38A3/PRKAB2/CYP4A11/SLC6A13/SLC6A12/SLC10A1/SLC16A2/CYP4F2/THRSP/SLC22A9/SLCO2B1/SLCO1B3/ACACB/SLCO1B7/SLCO1A2/ABCD3/SLC16A4/APBA1/SLC25A20/SLC16A13/SPX/MAP2K6/ABCB11/SLC16A12/ABCC2/SLC5A12/SLC16A11/FABP1/IL1B/P2RX4/TRPC4/PPARD/SLC16A5/SLC9A3R1/SLC16A6/PLA2G2A/SLC16A3/SLC5A6
liver	turquoise	BP	GO:0006637	acyl-CoA metabolic process	AADAT/GLYAT/CBR4/GSTZ1/ACSM2A/ACSM2B/ACSF2/HSD17B8/HMGCS2/ACSM5/GCDH/PDK2/DGAT2/PIPOX/HMGCL/PDK4/PDP2/ACACB/MLYCD/ACOT12/SLC25A1/MCEE/FASN/ACSM1/ACOT6/ACSBG1/ACSS1/ELOVL1/GPAT4
liver	turquoise	BP	GO:0035383	thioester metabolic process	AADAT/GLYAT/CBR4/GSTZ1/ACSM2A/ACSM2B/ACSF2/HSD17B8/HMGCS2/ACSM5/GCDH/PDK2/DGAT2/PIPOX/HMGCL/PDK4/PDP2/ACACB/MLYCD/ACOT12/SLC25A1/MCEE/FASN/ACSM1/ACOT6/ACSBG1/ACSS1/ELOVL1/GPAT4
liver	turquoise	BP	GO:0042573	retinoic acid metabolic process	ADH6/ADH1B/ADH1C/ADH1A/CYP2C8/CYP3A4/BCO2/CYP3A5/CYP3A7/CYP1A1/ADH7/UGT1A7/CYP27C1/ALDH1A3
liver	turquoise	BP	GO:0009074	aromatic amino acid family catabolic process	AADAT/HAAO/HNMT/GSTZ1/PAH/QDPR/UROC1/IDO2/PCBD1/HPD/HDC/IL4I1/ASRGL1
liver	turquoise	BP	GO:0016052	carbohydrate catabolic process	DHTKD1/SORD/GLYCTK/PFKFB1/DCXR/GBA3/PKLR/OGDHL/IDNK/GALM/CRYL1/ALDOB/XYLB/AKR1A1/GPD1/TKFC/NEU4/CBFA2T3/ABHD10/ALDH1A1/GCK/GALK1/PPP1R3B/ARNT/KHK/HTR2A/TREH/INSR/NUP62/DHDH/FUT7/PHKG1/FUT1/HDAC4/PFKFB4/FOXK1/FOXK2/NUP188/FUT4/HK2/PFKP/GK/HIF1A/ALDOA
liver	turquoise	BP	GO:0006067	ethanol metabolic process	ADH6/SULT1E1/ADH1B/ADH4/ADH1C/ADH1A/SULT1A2/SULT1A1/ALDH1A1/ADH7/ACSS1
liver	turquoise	BP	GO:0019369	arachidonic acid metabolic process	CYP4A11/CYP2C9/CYP4F12/CYP4F2/EPHX2/CYP2C8/CBR1/CYP2J2/CYP2A6/CYP1A2/CYP2C19/CYP2A7/CYP2G1P/CYP2B6/CYP1A1/CYP2E1/CYP2A13/DAGLA
liver	turquoise	BP	GO:0001676	long-chain fatty acid metabolic process	ACADL/ACOX1/CYP4A11/CYP2C9/CYP4F12/CYP4F2/EPHX2/ACAA1/GSTA1/CYP2C8/CBR1/CYP2J2/CYP2A6/CYP1A2/CYP2C19/CYP3A4/GSTM4/CYP4F3/ACOT12/CYP2A7/CYP2G1P/CYP2B6/CYP1A1/CYP2E1/CYP2A13/PNPLA3/ACSBG1/DAGLA/ELOVL1
liver	turquoise	BP	GO:0051289	protein homotetramerization	UPB1/CAT/ALDH5A1/ACADL/CBR4/DCXR/ATP5IF1/DPYS/PEX14/ST13/MAT1A/GNMT/ACACB/PCBD1/ACPP/ALDH1A3/SHMT2/APPL2/TRPM2/TRPM4/CRTC3/PFKP/VASP/GPX3/ALDOA/SOD2
liver	turquoise	BP	GO:0006006	glucose metabolic process	SORD/ALDH5A1/PCK2/PFKFB1/RGN/DCXR/PKLR/IRS1/ENPP1/GALM/SLC25A10/GPLD1/ALDOB/PDK2/AKR1A1/DGAT2/GPD1/RORC/GNMT/RBP4/GSK3B/PDK4/ACACB/SLC45A3/MLYCD/GCK/OMA1/SLC25A1/PPP1R3B/KHK/NFE2L1/OAS1/FOXA2/SIK1/INSR/GDPGP1/PPARD/FOXK1/FOXK2/HK2/MIDN/PTPN2/PFKP/PHLDA2/ALDOA
liver	turquoise	BP	GO:0042133	neurotransmitter metabolic process	UPB1/DMGDH/ALDH5A1/GLYAT/AMT/BCHE/HNMT/RGN/PAH/ALDH7A1/SARDH/BHMT/DPYS/PHGDH/GCAT/RIDA/DBH/PTK2B/SRD5A1/DDAH1/LRTOMT/COMT/ASS1/SLC22A2/PTX3/HDC/INSR/SHMT2/IL1B/DAGLA/P2RX4/SDSL/TSPO/SIRPA/ICAM1/ATP2B4
liver	turquoise	BP	GO:0006000	fructose metabolic process	SORD/GLYCTK/PFKFB1/ALDOB/TKFC/ALDH1A1/KHK/PFKFB4/ALDOA
liver	turquoise	BP	GO:0006069	ethanol oxidation	ADH6/ADH1B/ADH4/ADH1C/ADH1A/ALDH1A1/ADH7/ACSS1
liver	turquoise	BP	GO:0001505	regulation of neurotransmitter levels	SLC6A1/UPB1/DMGDH/ALDH5A1/GLYAT/AMT/BCHE/HNMT/RGN/PAH/ALDH7A1/SARDH/BHMT/GPER1/DPYS/PHGDH/GCAT/LRRK2/DRD1/RIDA/SNAP47/ARL6IP1/GSK3B/DBH/ADRA1A/PTK2B/SRD5A1/APBA1/FMR1/DDAH1/CALM3/LRTOMT/SLC29A1/HTR2A/COMT/ASS1/PFN2/SYT1/SLC22A2/PTX3/HDC/NRXN2/INSR/OTOF/SHMT2/IL1B/GIPC1/DAGLA/P2RX4/SYT12/SEPTIN5/STXBP1/ADORA2B/MCTP2/SDSL/SLC6A9/DOC2B/TSPO/SIRPA/DTNBP1/STX3/SYN1/ICAM1/ATP2B4/FLOT1/SLC38A1
liver	turquoise	BP	GO:0006633	fatty acid biosynthetic process	PECR/ACADL/PRKAB2/CBR4/RGN/CYP2C9/EPHX2/ACSM2A/ACSM2B/HSD17B8/ACSM5/CYP2C8/CBR1/ABHD1/CYP1A2/PDK4/CYP7A1/ACACB/CYP3A4/GSTM4/SLC45A3/MLYCD/APOC3/ACOT12/ABCD3/FADS6/FASN/CYP1A1/CYP2E1/APOA5/ACSM1/PRXL2B/IL1B/ACSS1/TRIB3/ELOVL1/NR1H2
liver	turquoise	BP	GO:0033559	unsaturated fatty acid metabolic process	ACOX1/CYP4A11/CYP2C9/CYP4F12/CYP4F2/EPHX2/ACAA1/GSTA1/CYP2C8/PTGR2/CBR1/CYP2J2/ZADH2/CYP2A6/CYP1A2/CYP2C19/CYP4F3/CYP2A7/CYP2G1P/CYP2B6/CYP1A1/CYP2E1/CYP2A13/PRXL2B/IL1B/DAGLA/ELOVL1/TNFRSF1A
liver	turquoise	BP	GO:1901607	alpha-amino acid biosynthetic process	BHMT2/PAH/ADI1/GATM/BHMT/OTC/PHGDH/GAMT/GGT1/ASS1/CBS/SHMT2/PYCR1/MTHFR/PLOD3/ASNS/BCAT1/PYCR2/PLOD2/ATP2B4
liver	turquoise	BP	GO:0006749	glutathione metabolic process	ALDH5A1/HAGH/GSTZ1/GSTK1/GSTA1/IDH1/GSTA4/MMACHC/MGST2/GSTA2/SOD1/GSTM4/NAT8/OPLAH/GGT1/NFE2L1/CHAC1/GPX1
liver	turquoise	BP	GO:0019216	regulation of lipid metabolic process	SEC14L2/ACADL/PRKAB2/ACOX1/CYP4A11/ETFBKMT/RGN/GSTZ1/FGFR4/IRS1/SPHK2/EPHX2/TM6SF2/THRSP/RBL2/HMGCS2/IDH1/GPER1/GPLD1/PIK3R1/PDK2/DGAT2/HSD17B13/FMC1/RORC/NFYC/GPAM/SORL1/PDK4/CYP7A1/SOD1/PDP2/ACACB/SLC45A3/PTK2B/MLYCD/ENHO/APOC3/APOA1/HNF4A/TM7SF2/FASN/HDAC3/CYP1A1/HTR2A/NR1D2/APOA5/NFE2L1/SNAI2/APOA2/FABP1/SIK1/AGAP2/CISH/IL1B/APPL2/CCR7/HELZ2/SCARB1/GOLM1/TRIB3/PPARD/SMPD2/TSPO/VDR/CRTC3/TNFRS…
liver	turquoise	BP	GO:0006081	cellular aldehyde metabolic process	GRHPR/GLYCTK/ADH4/HOGA1/HAGH/ALDH3A2/ALDH7A1/IDH1/ALDOB/PRODH2/AKR1A1/TKFC/AKR7A2/ALDH1A1/BCO2/AKR7A3/KHK/CYP27C1/ALDH1A3/RPIA/PDXK
liver	turquoise	BP	GO:0046460	neutral lipid biosynthetic process	PCK2/MOGAT2/RGN/MOGAT1/THRSP/GPLD1/DGAT2/GPAM/ANG/PNPLA3/SIK1/SCARB1/GPAT4/NR1H2/GK
liver	turquoise	BP	GO:0046463	acylglycerol biosynthetic process	PCK2/MOGAT2/RGN/MOGAT1/THRSP/GPLD1/DGAT2/GPAM/ANG/PNPLA3/SIK1/SCARB1/GPAT4/NR1H2/GK
liver	turquoise	BP	GO:0006814	sodium ion transport	SLC38A3/SLC38A11/SLC17A4/DMD/HCN3/SLC10A1/SNTA1/SLC34A1/SLC23A1/SLC5A9/CNKSR3/SCN8A/SLC17A3/SHROOM2/SLC38A4/CAMK2D/SLC20A2/SCN11A/SLC17A1/SLC13A2/COMMD3/KLHL3/ABCB11/SLC5A12/SIK1/SCN3B/P2RX4/SLC4A11/SLC28A3/WNK4/KCNK1/SLC9A3R1/TRPM2/SLC34A2/TRPM4/SLC41A1/SCN1B/GLRX/NETO2/SLC6A8/YWHAH/ATP2B4/SLC5A6/SLC38A1
liver	turquoise	BP	GO:0006558	L-phenylalanine metabolic process	GSTZ1/PAH/QDPR/PCBD1/HPD/IL4I1/ASRGL1
liver	turquoise	BP	GO:0006559	L-phenylalanine catabolic process	GSTZ1/PAH/QDPR/PCBD1/HPD/IL4I1/ASRGL1
liver	turquoise	BP	GO:1902221	erythrose 4-phosphate/phosphoenolpyruvate family amino acid metabolic process	GSTZ1/PAH/QDPR/PCBD1/HPD/IL4I1/ASRGL1
liver	turquoise	BP	GO:1902222	erythrose 4-phosphate/phosphoenolpyruvate family amino acid catabolic process	GSTZ1/PAH/QDPR/PCBD1/HPD/IL4I1/ASRGL1
liver	turquoise	BP	GO:0051056	regulation of small GTPase mediated signal transduction	RAC3/RALGPS2/NET1/FGD4/CCDC125/FAM13A/ALS2/ADRA1A/IQSEC1/SYDE2/APOC3/ARHGAP32/ARHGEF28/FARP2/APOA1/GARNL3/ARHGEF9/ARHGAP29/CGNL1/ARHGAP10/ARHGEF37/PSD3/SOS1/PLEKHG6/ARHGAP24/DNMBP/ECT2L/DEPDC7/GPR17/PRAG1/CAVIN4/SPRY4/RHOC/NUP62/IQSEC2/SH2B2/RAP1GAP2/ARHGEF19/ARHGEF16/FARP1/SRGAP1/F2RL3/RAPGEF1/BCR/ARHGAP39/ARHGDIA/EPO/TRIO/GRB2/ARFGEF3/NRP1/GMIP/DYNLT1/SIPA1L2/ARHGAP22/RHOD/RAP1GAP/RHOG/RHOQ/FLO…
liver	turquoise	BP	GO:0042180	cellular ketone metabolic process	AADAT/ACADL/ADH4/PRKAB2/ETFBKMT/CBR4/HAGH/RGN/GSTZ1/FGFR4/IRS1/SIRT5/CYP4F2/BHMT/DHRS4/OAZ2/SRD5A2/PDK2/AKR1A1/DGAT2/GPD1/AFP/COQ5/CYP46A1/AKR7A2/PDK4/CYP7A1/PDP2/ACACB/SLC45A3/SRD5A1/MLYCD/APOC3/IDO2/CRYZL1/CYP2B6/APOA5/NFE2L1/FDXR/COMT/PPTC7/FABP1/IL1B/APPL2/PSMC5/TRIB3/NR1H2/ATP2B4
liver	turquoise	BP	GO:0043434	response to peptide hormone	CAT/PCK2/PFKFB1/PKLR/TNFSF10/IRS1/HADH/QDPR/ENPP1/F7/OTC/GPER1/GPLD1/SLC34A1/GHR/PIK3R1/PDK2/NUCKS1/ATP6V0E2/SORL1/GSK3B/PRLR/CPEB2/PDK4/SLC30A10/SRD5A1/ENHO/GNAI1/TBC1D4/GNRHR2/GCK/BRIP1/SESN3/HSD11B2/CDO1/FYN/AHSG/KHK/SOS1/ABCC2/ASS1/TRPV4/GLP2R/PAK1/VWA2/ATP6V0A1/CSK/ATP6V0D1/INSR/CISH/IL1B/APPL2/SH2B2/BSG/STAT5A/SLC2A1/TRIB3/EIF2B5/RETN/GRB2/CCND3/EIF2B4/NME2/PTPN2/BCAR1/ATP6V0B/ANXA5/RANGAP1…
liver	turquoise	BP	GO:0019748	secondary metabolic process	CBR4/BDH2/ACAA1/PMEL/AKR1A1/CYP2A6/CYP1A2/AKR7A2/CYP2A7/AKR7A3/AS3MT/DCT/CYP1A1/WNT5A/CYP2A13/ABCC2/CBS/UGT1A7/GIPC1
liver	turquoise	BP	GO:0019432	triglyceride biosynthetic process	PCK2/MOGAT2/RGN/MOGAT1/THRSP/GPLD1/DGAT2/GPAM/PNPLA3/SIK1/SCARB1/GPAT4/NR1H2/GK
liver	turquoise	BP	GO:0016999	antibiotic metabolic process	DHTKD1/ADH6/SULT1E1/CAT/ADH1B/ALDH5A1/ADH4/CBR4/PCK2/ADH1C/OGDHL/UROC1/IDH1/SLC34A1/ADH1A/SULT1A2/AKR1A1/CYP1A2/SULT1A1/AKR7A2/SOD1/ALDH1A1/FYN/CYP1A1/ADH7/ABCC2/ACSM1/MPV17L/ACSS1/GNPDA1/GPX1/GPX3/MTHFD1L
liver	turquoise	BP	GO:0009068	aspartate family amino acid catabolic process	AADAT/ASPA/ALDH7A1/GCDH/MAT1A/PIPOX/GCAT/RIDA/SDSL/ASRGL1
liver	turquoise	BP	GO:0009310	amine catabolic process	DMGDH/AADAT/HAAO/HNMT/ALDH7A1/SARDH/BHMT/PAOX/IDO2/ATP2B4
liver	turquoise	BP	GO:0046597	negative regulation of viral entry into host cell	TRIM26/PTX3/IFITM1/TRIM59/TRIM31/TRIM8/TRIM11/IFITM3/IFITM2
liver	turquoise	BP	GO:0019320	hexose catabolic process	GLYCTK/PKLR/GALM/ALDOB/TKFC/ALDH1A1/GCK/GALK1/KHK/FUT7/FUT1/FOXK1/FOXK2/FUT4/HK2/PFKP/ALDOA
liver	turquoise	BP	GO:0008286	insulin receptor signaling pathway	IRS1/ENPP1/GPLD1/PIK3R1/PDK2/NUCKS1/ATP6V0E2/SORL1/GSK3B/PDK4/ENHO/SESN3/AHSG/SOS1/PAK1/VWA2/ATP6V0A1/ATP6V0D1/INSR/CISH/IL1B/SH2B2/GRB2/CCND3/PTPN2/BCAR1/ATP6V0B/PTPN1/SOCS1/RHOQ/SHC1
liver	turquoise	BP	GO:0006063	uronic acid metabolic process	SORD/DCXR/CRYL1/XYLB/AKR1A1/UGT2B7/UGT2B15/ABHD10/UGT2B11/UGT1A7
liver	turquoise	BP	GO:0019585	glucuronate metabolic process	SORD/DCXR/CRYL1/XYLB/AKR1A1/UGT2B7/UGT2B15/ABHD10/UGT2B11/UGT1A7
liver	turquoise	BP	GO:0062012	regulation of small molecule metabolic process	SEC14L2/ACADL/PRKAB2/ETFBKMT/PFKFB1/RGN/GSTZ1/FGFR4/IRS1/SIRT5/SPHK2/EPHX2/ATP5IF1/BHMT/OAZ2/ENPP1/GPER1/GPLD1/PDK2/DGAT2/GPD1/RORC/GNMT/NFYC/GPAM/GSK3B/SLC25A23/CLYBL/CBFA2T3/PDK4/CYP7A1/SOD1/PDP2/ACACB/SLC45A3/PTK2B/MLYCD/APOC3/GCK/PPP1R3B/ARNT/TM7SF2/FASN/KHK/HTR2A/COX7A2L/APOA5/NFE2L1/COMT/SNAI2/PPTC7/FABP1/FOXA2/PDZD3/SIK1/INSR/NUP62/SHMT2/IL1B/APPL2/PSMC5/ADORA2B/HDAC4/PFKFB4/TRIB3/FOXK1/FO…
liver	turquoise	BP	GO:0050892	intestinal absorption	MOGAT2/SLC2A2/ABCG8/SLC46A1/SOAT2/APOA1/APOA5/APOA2/FABP1/HAMP/SLC2A5/SCARB1/VDR
liver	turquoise	BP	GO:1901264	carbohydrate derivative transport	SLC17A4/GJB1/SLC35A3/SLC17A3/SLC25A23/SLC28A2/SLC25A42/SLC17A1/SLC35A1/SLC29A1/SLC50A1/SLC28A3/GLTP/SCARB1/SLC35E4/VLDLR/SLC37A1/SLC25A19/SLC35C1/LBP
liver	turquoise	BP	GO:0006694	steroid biosynthetic process	ACOX2/AMACR/SEC14L2/FAXDC2/AKR1D1/FGFR4/CYP39A1/CYP27A1/HSD17B8/SRD5A2/HMGCS2/NFYC/GPAM/HSD17B14/CYP46A1/PRLR/CYP7A1/SOD1/ACACB/CYP3A4/SRD5A1/HINT2/APOA1/HSD11B2/TM7SF2/FASN/APOA5/ABCB11/FDXR/SNAI2/DHRS11/HSD3B1/LBR/IL1B/SCARB1/TSPO/CYB5R3/VDR/CYP21A2
liver	turquoise	BP	GO:0032868	response to insulin	CAT/PCK2/PFKFB1/PKLR/TNFSF10/IRS1/HADH/ENPP1/OTC/GPLD1/PIK3R1/PDK2/NUCKS1/ATP6V0E2/SORL1/GSK3B/CPEB2/PDK4/SRD5A1/ENHO/TBC1D4/GCK/SESN3/HSD11B2/AHSG/KHK/SOS1/TRPV4/PAK1/VWA2/ATP6V0A1/ATP6V0D1/INSR/CISH/IL1B/APPL2/SH2B2/SLC2A1/TRIB3/RETN/GRB2/CCND3/PTPN2/BCAR1/ATP6V0B/PTPN1/SOCS1/ICAM1/RHOQ/SHC1
liver	turquoise	BP	GO:0007266	Rho protein signal transduction	RAC3/NET1/FGD4/CCDC125/ALS2/ADRA1A/APOC3/ARHGEF28/FARP2/APOA1/ARHGEF9/ARHGAP29/ARHGEF37/SOS1/PLEKHG6/DNMBP/ECT2L/CELSR1/RHOBTB3/GPR17/PRAG1/CAVIN4/RHOC/ARHGEF19/ARHGEF16/FARP1/F2RL3/BCR/ARHGDIA/TRIO/GNA12/LIMK1/NRP1/TAX1BP3/RHOD/CDC42EP1/RHOG/CFL1/RHOQ/FLOT1
liver	turquoise	BP	GO:0006767	water-soluble vitamin metabolic process	HAAO/RGN/ENPP1/SLC23A1/AKR1A1/ALDH1L1/MMACHC/CLYBL/SLC46A1/SLC19A1/AMN/ACPP/SHMT2/MTHFR/SLC2A1/CYB5R3/VNN2/SLC25A19/PDXK/MTHFD2/MTHFD1L/SLC5A6
liver	turquoise	BP	GO:0051180	vitamin transport	SLC2A2/AFM/SLC23A1/TTPA/SLC46A1/APOA1/SLC19A1/AMN/FOLR3/SCARB1/SLC2A1/SLC25A19/SLC5A6
liver	turquoise	BP	GO:0042135	neurotransmitter catabolic process	DMGDH/ALDH5A1/AMT/HNMT/ALDH7A1/SARDH/BHMT/LRTOMT/COMT
liver	turquoise	BP	GO:0042402	cellular biogenic amine catabolic process	DMGDH/AADAT/HAAO/HNMT/ALDH7A1/SARDH/BHMT/PAOX/IDO2
liver	turquoise	BP	GO:0046596	regulation of viral entry into host cell	CD4/TRIM26/PTX3/IFITM1/TRIM59/NECTIN2/TRIM31/TRIM8/TRIM11/IFITM3/IFITM2
liver	turquoise	BP	GO:1903825	organic acid transmembrane transport	SLC38A3/SLC38A11/PRKAB2/SLC6A12/THRSP/SLC25A10/SLC23A1/ARL6IP1/SLC38A4/ACACB/SLC46A1/SLC25A1/SLC25A20/SLC3A1/SLC19A1/SLC16A12/SLC5A12/SLC16A11/SLC6A20/SLC38A5/SLC6A9/SLC36A1/SLC6A8/PRAF2/SLC16A3/SLC7A1/SLC7A6/SLC5A6/SLC38A1
liver	turquoise	BP	GO:1905039	carboxylic acid transmembrane transport	SLC38A3/SLC38A11/PRKAB2/SLC6A12/THRSP/SLC25A10/SLC23A1/ARL6IP1/SLC38A4/ACACB/SLC46A1/SLC25A1/SLC25A20/SLC3A1/SLC19A1/SLC16A12/SLC5A12/SLC16A11/SLC6A20/SLC38A5/SLC6A9/SLC36A1/SLC6A8/PRAF2/SLC16A3/SLC7A1/SLC7A6/SLC5A6/SLC38A1
liver	turquoise	BP	GO:1901292	nucleoside phosphate catabolic process	DHTKD1/PFKFB1/PKLR/OGDHL/ASPDH/ENPP1/ALDOB/XDH/GPD1/NTHL1/ENPP3/NT5E/CBFA2T3/MLYCD/UNG/GCK/DNPH1/GALK1/ARNT/HTR2A/GDA/MBD4/INSR/NUP62/PDE9A/GPX1/HDAC4/PFKFB4/FOXK1/FOXK2/NUP188/HK2/ENTPD4/PFKP/UPP1/HIF1A/ALDOA
liver	turquoise	BP	GO:0010675	regulation of cellular carbohydrate metabolic process	PFKFB1/RGN/IRS1/ENPP1/GPER1/GPLD1/PDK2/DGAT2/RORC/GNMT/GSK3B/CBFA2T3/PDK4/ACACB/SLC45A3/PTK2B/MLYCD/GCK/PPP1R3B/KHK/NFE2L1/FOXA2/SIK1/INSR/HDAC4/FOXK1/FOXK2/MIDN/PTPN2/PHLDA2
liver	turquoise	BP	GO:0046339	diacylglycerol metabolic process	MOGAT2/MOGAT1/DGAT2/ANG/DGKB/APOA2/DAGLA/GPAT4/DGKH
liver	turquoise	BP	GO:0010906	regulation of glucose metabolic process	PFKFB1/RGN/IRS1/ENPP1/GPLD1/PDK2/DGAT2/RORC/GNMT/GSK3B/PDK4/ACACB/SLC45A3/MLYCD/GCK/PPP1R3B/KHK/NFE2L1/FOXA2/SIK1/INSR/FOXK1/FOXK2/MIDN/PTPN2/PHLDA2
liver	turquoise	BP	GO:0072511	divalent inorganic cation transport	MICU1/LIME1/DMD/RGN/SPHK2/MRS2/SLC39A5/GPER1/HOMER2/TPCN2/AKAP6/DRD1/SLC39A11/SLC25A23/SLC30A10/STIMATE/ADRA1A/PLCG2/ATP7B/PTK2B/CAMK2D/GCK/PACSIN3/CD4/FMR1/CHERP/CLDN16/GNAO1/BIN1/CALM3/FYN/SMDT1/GRIN2B/HTR2A/CX3CL1/CDH23/ABCC2/CAMK2B/AHNAK/TRPV4/PKDREJ/TRPM3/PLCZ1/KCNE2/TMEM38A/CACNA1F/SLC39A4/KCNN4/P2RX4/ATP2C2/CCR7/TRPC4/JPH1/FAM155B/SLC30A3/F2RL3/SPINK1/EPO/TRPM2/TRPM4/TSPO/TMEM163/MCU/VDR/S…
liver	turquoise	BP	GO:0009071	serine family amino acid catabolic process	DAO/AMT/SCLY/CDO1/CBS/SHMT2/SDSL
liver	turquoise	BP	GO:0033273	response to vitamin	ALAD/CAT/BCHE/F7/OTC/SLC34A1/TRIM24/MGMT/BRIP1/CD4/LRAT/PEMT/CYP1A1/SNAI2/FGF23/HAMP/MTHFR/PPARD/EPO/TSPO/VDR/SPP1
liver	turquoise	BP	GO:0046890	regulation of lipid biosynthetic process	SEC14L2/ACADL/PRKAB2/RGN/FGFR4/SPHK2/THRSP/IDH1/GPER1/GPLD1/DGAT2/HSD17B13/NFYC/GPAM/PDK4/CYP7A1/SOD1/ACACB/SLC45A3/ENHO/APOC3/APOA1/TM7SF2/FASN/HTR2A/APOA5/SNAI2/SIK1/AGAP2/IL1B/SCARB1/TRIB3/SMPD2/TSPO/VDR/TNFRSF1A/NR1H2/LPCAT1
liver	turquoise	BP	GO:0060401	cytosolic calcium ion transport	MICU1/LIME1/DMD/GPER1/TPCN2/AKAP6/DRD1/SLC25A23/ADRA1A/PLCG2/PTK2B/CAMK2D/CD4/CHERP/CALM3/FYN/SMDT1/GRIN2B/HTR2A/CX3CL1/TMEM38A/P2RX4/CCR7/JPH1/FAM155B/F2RL3/EPO/TRPM2/MCU/ERO1A/CALM2/BAK1/FKBP1A/ATP2B4
liver	turquoise	BP	GO:0034330	cell junction organization	EPB41L5/GJB1/DSG1/CDHR3/CDH2/IQSEC1/HRG/CDH1/PTK2B/NUMB/TESK2/ANG/MARVELD3/PATJ/CXADR/FZD5/PTPRJ/ACE2/TRPV4/PRKCA/SNAI2/PKP4/CTNND1/CCM2/CSK/RHOC/ITGA5/CD151/NECTIN2/NLGN2/CBFB/ZNF703/ACTG1/RAPGEF1/BCR/TLN2/RCC2/PPM1F/DUSP22/PTPN23/NRP1/CD177/LIMCH1/RUNX1/RHOD/PVR/CAPZA1/VASP/ACTN1/TLN1/FLOT1
liver	turquoise	BP	GO:0031667	response to nutrient levels	ALAD/SORD/CAT/SLC38A3/BCHE/PCK2/PFKFB1/PKLR/SIRT5/SLC39A5/F7/OTC/SLC34A1/TRIM24/PDK2/HMGCL/LRRK2/TTPA/TMEM135/SORL1/MGMT/ABCG8/PDK4/SOD1/ACACB/SRD5A1/LRP11/BRIP1/OMA1/SESN3/APOA1/CD4/HSD11B2/LRAT/FYN/SPX/PEMT/CYP1A1/DEPDC5/SSTR1/COMT/ASS1/TRPV4/WIPI2/SNAI2/EIF2AK2/FAS/FOXA2/SIK1/WNT9B/FGF23/SLC39A4/HAMP/IL1B/APPL2/NUAK2/P2RX4/GABARAP/MTHFR/SLC2A1/MAP1LC3B2/PPARD/FOXK1/CLEC16A/FOXK2/EPO/TRPM4/TSPO…
liver	turquoise	BP	GO:0000422	autophagy of mitochondrion	USP30/ATP5IF1/FBXO7/FZD5/WIPI2/ATG9B/GABARAP/ATG13/MAP1LC3B2/CLEC16A/TSPO/WDR45/ATG2A/HK2/RNF41/WDR45B/FUNDC2/HIF1A/MAP1LC3B
liver	turquoise	BP	GO:0061726	mitochondrion disassembly	USP30/ATP5IF1/FBXO7/FZD5/WIPI2/ATG9B/GABARAP/ATG13/MAP1LC3B2/CLEC16A/TSPO/WDR45/ATG2A/HK2/RNF41/WDR45B/FUNDC2/HIF1A/MAP1LC3B
liver	turquoise	BP	GO:0051262	protein tetramerization	UPB1/CAT/ALDH5A1/ACADL/CBR4/DCXR/ATP5IF1/DHRS4/HSD17B8/DPYS/PEX14/ST13/MAT1A/HMGCL/GNMT/ACACB/PCBD1/GRIN2B/TRPM3/ACPP/ALDH1A3/INSR/H4C8/SHMT2/APPL2/H4C9/TRPM2/TRPM4/CRTC3/PFKP/VASP/GPX3/ALDOA/SOD2
liver	turquoise	BP	GO:0050995	negative regulation of lipid catabolic process	ETFBKMT/GPLD1/FMC1/SORL1/ACACB/APOC3/APOA2/IL1B/CRTC3
liver	turquoise	BP	GO:0072337	modified amino acid transport	PDZK1/SLC46A1/SLC3A1/SLC19A1/SLC16A12/FOLR3/SLC9A3R1/SLC6A8/SLC5A6
liver	turquoise	BP	GO:0009069	serine family amino acid metabolic process	DAO/GLYAT/AMT/PHGDH/GCAT/SEPSECS/RIDA/SCLY/TST/CDO1/GGT1/CBS/SHMT2/SDSL
liver	turquoise	BP	GO:1901617	organic hydroxy compound biosynthetic process	ACOX2/AMACR/SEC14L2/FAXDC2/DAO/AKR1D1/PCK2/FGFR4/PAH/CYP39A1/SPHK2/CYP27A1/QDPR/SRD5A2/HMGCS2/GPER1/PLCL2/PMEL/NFYC/GPAM/CYP46A1/DBH/CYP7A1/SOD1/PLCG2/ACACB/CYP3A4/PTK2B/PCBD1/APOA1/TM7SF2/FASN/DCT/WNT5A/APOA5/ABCB11/SNAI2/PLCZ1/LBR/IP6K3/HDC/IL1B/GIPC1/ACER2/CYB5R3/VDR/PDXK/ITPKC
liver	turquoise	BP	GO:0006775	fat-soluble vitamin metabolic process	CYP4F12/CYP4F2/CYP27A1/CBR1/TTPA/CYP3A4/LRAT/CYP1A1/SNAI2/FGF23/IL1B/PPARD/VDR
liver	turquoise	BP	GO:0035725	sodium ion transmembrane transport	SLC17A4/DMD/HCN3/SNTA1/SLC34A1/SLC23A1/CNKSR3/SCN8A/SLC17A3/SHROOM2/CAMK2D/SLC20A2/SCN11A/ABCB11/SCN3B/SLC4A11/SLC28A3/WNK4/KCNK1/SLC9A3R1/TRPM2/SLC34A2/TRPM4/SLC41A1/SCN1B/GLRX/NETO2/YWHAH/ATP2B4
liver	turquoise	BP	GO:0051235	maintenance of location	LIME1/DMD/TAPT1/ENPP1/GPER1/DGAT2/TPCN2/SYNE1/SYNE3/AKAP6/DRD1/SORL1/SLC25A23/AKAP9/PLCG2/ACACB/ATP7B/PTK2B/CAMK2D/MEST/APOA1/CD4/CHERP/CALM3/HTR2A/CX3CL1/GET4/TMEM38A/B4GALNT1/SP100/IL1B/CCR7/JPH1/SLC30A3/RER1/F2RL3/SCARB1/NFKBIE/TLN2/PPARD/TRPM2/TSPO/SPAG4/HK2/ERO1A/ITGAV/NR1H2/BCL3/CALM2/PTPN2/FKBP1A/LCN2/ANXA5/CRP/RANGAP1/TLN1
liver	turquoise	BP	GO:0046164	alcohol catabolic process	SULT1E1/SORD/AKR1D1/ADH4/CYP39A1/CYP27A1/SULT1A2/TKFC/CYP46A1/SULT1A1/CYP7A1/ADH7/INPP1/SCARB1/GK
liver	turquoise	BP	GO:0050994	regulation of lipid catabolic process	ETFBKMT/IRS1/IDH1/GPLD1/FMC1/SORL1/ACACB/MLYCD/APOC3/APOA5/APOA2/FABP1/IL1B/SCARB1/CRTC3
liver	turquoise	BP	GO:0008209	androgen metabolic process	AKR1D1/ESR1/HSD17B8/SRD5A2/UGT2B7/CYP3A4/SRD5A1/HSD3B1/SCARB1/SPP1
liver	turquoise	BP	GO:0060837	blood vessel endothelial cell differentiation	HEY2/CCM2/HEY1/RBPJ/DLL1/NRP1
liver	turquoise	BP	GO:0006084	acetyl-CoA metabolic process	AADAT/GSTZ1/HMGCS2/PDK2/PIPOX/PDK4/PDP2/ACACB/MLYCD/ACOT12/FASN/ACSS1
liver	turquoise	BP	GO:0030260	entry into host cell	SLC10A1/CDHR3/CDH1/SLC20A2/CD4/CXADR/HTR2A/TRIM26/ACE2/CTNND1/PTX3/IFITM1/TRIM59/ITGA5/NECTIN2/TRIM31/CLEC5A/SCARB1/TRIM8/ITGB5/GRB2/ITGAV/DYNLT1/TRIM11/PVR/IFITM3/ICAM1/IFITM2
liver	turquoise	BP	GO:0044409	entry into host	SLC10A1/CDHR3/CDH1/SLC20A2/CD4/CXADR/HTR2A/TRIM26/ACE2/CTNND1/PTX3/IFITM1/TRIM59/ITGA5/NECTIN2/TRIM31/CLEC5A/SCARB1/TRIM8/ITGB5/GRB2/ITGAV/DYNLT1/TRIM11/PVR/IFITM3/ICAM1/IFITM2
liver	turquoise	BP	GO:0051806	entry into cell of other organism involved in symbiotic interaction	SLC10A1/CDHR3/CDH1/SLC20A2/CD4/CXADR/HTR2A/TRIM26/ACE2/CTNND1/PTX3/IFITM1/TRIM59/ITGA5/NECTIN2/TRIM31/CLEC5A/SCARB1/TRIM8/ITGB5/GRB2/ITGAV/DYNLT1/TRIM11/PVR/IFITM3/ICAM1/IFITM2
liver	turquoise	BP	GO:0051828	entry into other organism involved in symbiotic interaction	SLC10A1/CDHR3/CDH1/SLC20A2/CD4/CXADR/HTR2A/TRIM26/ACE2/CTNND1/PTX3/IFITM1/TRIM59/ITGA5/NECTIN2/TRIM31/CLEC5A/SCARB1/TRIM8/ITGB5/GRB2/ITGAV/DYNLT1/TRIM11/PVR/IFITM3/ICAM1/IFITM2
liver	turquoise	BP	GO:0045017	glycerolipid biosynthetic process	CRLS1/PCK2/MOGAT2/RGN/MOGAT1/PIGV/ETNK2/THRSP/GPLD1/PIK3R1/DGAT2/GPD1/PCTP/PCYT2/PGAP3/ACP6/GPAM/PLD1/PLCG2/PIK3C2G/CEPT1/ANG/APOA1/PEMT/CPNE6/HTR2A/PNPLA3/CWH43/APOA2/SIK1/PLEKHA4/PIGG/AGAP2/INPP4A/CDIPT/SCARB1/VAC14/GPAT4/PLA2G2A/DDHD1/NR1H2/PITPNM1/PLSCR1/GK/LPCAT1
liver	turquoise	BP	GO:0006090	pyruvate metabolic process	DHTKD1/HOGA1/PCK2/HAGH/PFKFB1/GSTZ1/PKLR/OGDHL/ALDOB/PDK2/GPD1/CBFA2T3/PDK4/PDP2/GCK/GALK1/ARNT/HTR2A/INSR/NUP62/BSG/HDAC4/PFKFB4/FOXK1/FOXK2/NUP188/HK2/PFKP/SLC16A3/HIF1A/ALDOA
liver	turquoise	BP	GO:2000377	regulation of reactive oxygen species metabolic process	SIRT3/RGN/SIRT5/SPHK2/XDH/GADD45A/SLC30A10/SOD1/PTK2B/BCO2/DDAH1/NQO2/CCN6/FYN/ACE2/ASS1/MPV17L/PTX3/TFAP2A/INSR/IL1B/P2RX4/HDAC4/BCR/GRB2/TSPO/SIRPA/CDKN1A/HK2/RNF41/CD177/STK17A/MPV17/CRP/HIF1A/ICAM1/ATP2B4
liver	turquoise	BP	GO:0019217	regulation of fatty acid metabolic process	ACADL/PRKAB2/ETFBKMT/RGN/GSTZ1/IRS1/PDK2/DGAT2/PDK4/CYP7A1/PDP2/ACACB/SLC45A3/MLYCD/APOC3/APOA5/NFE2L1/FABP1/IL1B/APPL2/TRIB3/NR1H2
liver	turquoise	BP	GO:0009166	nucleotide catabolic process	DHTKD1/PFKFB1/PKLR/OGDHL/ASPDH/ALDOB/XDH/GPD1/NTHL1/NT5E/CBFA2T3/MLYCD/UNG/GCK/DNPH1/GALK1/ARNT/HTR2A/GDA/MBD4/INSR/NUP62/PDE9A/GPX1/HDAC4/PFKFB4/FOXK1/FOXK2/NUP188/HK2/ENTPD4/PFKP/UPP1/HIF1A/ALDOA
liver	turquoise	BP	GO:0070838	divalent metal ion transport	MICU1/LIME1/DMD/RGN/SPHK2/MRS2/SLC39A5/GPER1/HOMER2/TPCN2/AKAP6/DRD1/SLC39A11/SLC25A23/SLC30A10/STIMATE/ADRA1A/PLCG2/PTK2B/CAMK2D/GCK/PACSIN3/CD4/FMR1/CHERP/CLDN16/GNAO1/BIN1/CALM3/FYN/SMDT1/GRIN2B/HTR2A/CX3CL1/CDH23/CAMK2B/AHNAK/TRPV4/PKDREJ/TRPM3/PLCZ1/KCNE2/TMEM38A/CACNA1F/SLC39A4/KCNN4/P2RX4/ATP2C2/CCR7/TRPC4/JPH1/FAM155B/SLC30A3/F2RL3/SPINK1/EPO/TRPM2/TRPM4/TSPO/TMEM163/MCU/VDR/SLC41A1/ZDHHC…
liver	turquoise	BP	GO:0006639	acylglycerol metabolic process	CAT/PCK2/MOGAT2/RGN/MOGAT1/THRSP/GPLD1/DGAT2/GPAM/SORL1/APOC3/ANG/APOA1/CYP2E1/APOA5/DGKB/PNPLA3/APOA2/FABP1/SIK1/DAGLA/GPX1/SCARB1/GPAT4/DGKH/NR1H2/GK
liver	turquoise	BP	GO:0009110	vitamin biosynthetic process	RGN/CYP27A1/AKR1A1/MMACHC/CYP3A4/SNAI2/IL1B/VDR/PDXK
liver	turquoise	BP	GO:0060333	interferon-gamma-mediated signaling pathway	CAMK2D/PIAS1/TRIM34/TRIM26/CAMK2B/PARP14/OAS1/TRIM68/SP100/TRIM31/IRF4/NLRC5/TRIM8/FCGR1A/IFNGR2/NR1H2/PTPN2/SOCS1/ICAM1/HLA-E/IFNGR1
liver	turquoise	BP	GO:0042219	cellular modified amino acid catabolic process	DMGDH/ACADL/HOGA1/SARDH/BHMT/ALDH1L1/GGACT/GGT1/CHAC1/DIO3
liver	turquoise	BP	GO:0042558	pteridine-containing compound metabolic process	FOLH1/QDPR/PIPOX/ALDH1L1/PCBD1/SLC46A1/SLC19A1/SHMT2/MTHFR/MTHFD2/MTHFD1L
liver	turquoise	BP	GO:0006638	neutral lipid metabolic process	CAT/PCK2/MOGAT2/RGN/MOGAT1/THRSP/GPLD1/DGAT2/GPAM/SORL1/APOC3/ANG/APOA1/CYP2E1/APOA5/DGKB/PNPLA3/APOA2/FABP1/SIK1/DAGLA/GPX1/SCARB1/GPAT4/DGKH/NR1H2/GK
liver	turquoise	BP	GO:0072525	pyridine-containing compound biosynthetic process	DHTKD1/HAAO/PFKFB1/PKLR/OGDHL/ASPDH/ALDOB/QPRT/NADK2/GPD1/NMRK1/CBFA2T3/IDO2/GCK/GALK1/ARNT/HTR2A/NMNAT3/INSR/NUP62/HDAC4/PFKFB4/FOXK1/FOXK2/NUP188/HK2/PFKP/PDXK/HIF1A/ALDOA
liver	turquoise	BP	GO:0072593	reactive oxygen species metabolic process	CAT/SIRT3/RGN/SIRT5/SPHK2/EPHX2/ATP5IF1/XDH/LRRK2/CYP1A2/GADD45A/PDK4/SLC30A10/SOD1/SH3PXD2A/PTK2B/BCO2/DDAH1/NQO2/CCN6/FANCC/FYN/CYP1A1/ACE2/ASS1/MPV17L/PTX3/TFAP2A/INSR/IL1B/P2RX4/GPX1/HDAC4/BCR/GRB2/TSPO/SIRPA/CDKN1A/HK2/RNF41/CD177/STK17A/MPV17/GPX3/CRP/HIF1A/ICAM1/ATP2B4/SOD2
liver	turquoise	BP	GO:0046434	organophosphate catabolic process	DHTKD1/PFKFB1/PKLR/OGDHL/NAPEPLD/ASPDH/ENPP1/IDH1/ALDOB/XDH/GPD1/NTHL1/ENPP3/NT5E/CBFA2T3/PLCG2/MLYCD/UNG/GCK/DNPH1/GALK1/ARNT/HTR2A/GDA/APOA2/MBD4/INSR/NUP62/PDE9A/GPX1/INPP1/HDAC4/SCARB1/PFKFB4/FOXK1/FOXK2/NUP188/SMPD2/HK2/ENTPD4/PFKP/UPP1/HIF1A/ALDOA
liver	turquoise	BP	GO:0006109	regulation of carbohydrate metabolic process	PFKFB1/RGN/IRS1/ENPP1/GPER1/GPLD1/PDK2/DGAT2/GPD1/RORC/GNMT/GSK3B/CBFA2T3/PDK4/ACACB/SLC45A3/PTK2B/MLYCD/GCK/PPP1R3B/ARNT/KHK/HTR2A/NFE2L1/FOXA2/SIK1/INSR/NUP62/HDAC4/PFKFB4/FOXK1/FOXK2/NUP188/MIDN/PTPN2/PHLDA2/MLXIP/HIF1A
liver	turquoise	BP	GO:0034341	response to interferon-gamma	GBP7/CCL16/CCL15/VPS26B/CAMK2D/PIAS1/TRIM34/TRIM26/WNT5A/CX3CL1/CAMK2B/PARP14/ASS1/OAS1/IFITM1/TRIM68/SP100/TRIM31/IRF4/STXBP1/NLRC5/ACTG1/TRIM8/SIRPA/FCGR1A/IFNGR2/NR1H2/RAB43/CCL20/CXCL16/PTPN2/IFITM3/SOCS1/ICAM1/IFITM2/HLA-E/IFNGR1
liver	turquoise	BP	GO:0006641	triglyceride metabolic process	CAT/PCK2/MOGAT2/RGN/MOGAT1/THRSP/GPLD1/DGAT2/GPAM/SORL1/APOC3/APOA1/CYP2E1/APOA5/PNPLA3/APOA2/FABP1/SIK1/GPX1/SCARB1/GPAT4/NR1H2/GK
liver	turquoise	BP	GO:0033866	nucleoside bisphosphate biosynthetic process	CBR4/GSTZ1/PANK1/HSD17B8/GCDH/PDK2/SLC26A1/PDK4/PDP2/ACACB/MLYCD/SLC25A1/FASN/ACSBG1/ACSS1/PANK4/ELOVL1
liver	turquoise	BP	GO:0034030	ribonucleoside bisphosphate biosynthetic process	CBR4/GSTZ1/PANK1/HSD17B8/GCDH/PDK2/SLC26A1/PDK4/PDP2/ACACB/MLYCD/SLC25A1/FASN/ACSBG1/ACSS1/PANK4/ELOVL1
liver	turquoise	BP	GO:0034033	purine nucleoside bisphosphate biosynthetic process	CBR4/GSTZ1/PANK1/HSD17B8/GCDH/PDK2/SLC26A1/PDK4/PDP2/ACACB/MLYCD/SLC25A1/FASN/ACSBG1/ACSS1/PANK4/ELOVL1
liver	turquoise	BP	GO:0009064	glutamine family amino acid metabolic process	AADAT/DAO/ALDH5A1/NIT2/ART4/UROC1/OTC/PRODH2/PHGDH/GLYATL1/DDAH1/GGT1/ASS1/PYCR1/ASNS/PYCR2/ASRGL1/ATP2B4
liver	turquoise	BP	GO:1900076	regulation of cellular response to insulin stimulus	IRS1/ENPP1/GPLD1/PIK3R1/NUCKS1/SORL1/ENHO/SESN3/AHSG/PAK1/VWA2/CISH/IL1B/APPL2/CCND3/PTPN2/PTPN1/SOCS1
liver	turquoise	BP	GO:0015893	drug transport	SLC38A3/SFXN5/SLC47A1/SLC25A10/NR1I2/SFXN1/SLC22A1/DRD1/ARL6IP1/PDZK1/SLC17A3/SLC25A23/SLC25A42/SLC46A1/SLC25A1/HTR2A/SLC19A1/SLC16A12/ABCC2/SYT1/AMN/SLC47A2/SLC22A2/SLC6A20/FOLR3/SYT3/SYT12/SLC4A11/SLC38A5/NFKBIE/SLC6A9/SLC36A1/RETN/DTNBP1/SLC6A8/PRAF2/SLC25A19/SLC7A1/SLC5A6
liver	turquoise	BP	GO:0006865	amino acid transport	SLC6A1/SLC38A3/SLC38A11/SFXN5/SLC6A13/SLC6A12/SFXN2/SFXN1/ARL6IP1/SLC38A4/APBA1/SLC3A1/SLC16A12/NFE2L1/ACE2/SYT1/SLC6A20/GIPC1/TRPC4/STXBP1/SLC38A5/NFKBIE/SLC6A9/SLC36A1/SLC6A8/PRAF2/SLC7A1/SLC7A6/SLC38A1
liver	turquoise	BP	GO:0030002	cellular anion homeostasis	ENPP1/SLC34A1/ABCC2/FGF23/SLC9A3R1/SLC34A2
liver	turquoise	BP	GO:0030320	cellular monovalent inorganic anion homeostasis	ENPP1/SLC34A1/ABCC2/FGF23/SLC9A3R1/SLC34A2
liver	turquoise	BP	GO:0055062	phosphate ion homeostasis	FGFR4/ENPP1/SLC34A1/FGF23/SLC9A3R1/SLC34A2
liver	turquoise	BP	GO:0072505	divalent inorganic anion homeostasis	FGFR4/ENPP1/SLC34A1/FGF23/SLC9A3R1/SLC34A2
liver	turquoise	BP	GO:0072506	trivalent inorganic anion homeostasis	FGFR4/ENPP1/SLC34A1/FGF23/SLC9A3R1/SLC34A2
liver	turquoise	BP	GO:0046486	glycerolipid metabolic process	CAT/ALDH5A1/CRLS1/PCK2/MOGAT2/RGN/MOGAT1/PIGV/ETNK2/THRSP/NAPEPLD/GPLD1/PIK3R1/DGAT2/GPD1/PCTP/PCYT2/PGAP3/ACP6/GPAM/SORL1/PLD1/PLCG2/PIK3C2G/APOC3/CEPT1/ANG/APOA1/PEMT/CPNE6/FAM126B/CYP2E1/HTR2A/APOA5/DGKB/PLAAT2/PNPLA3/CWH43/APOA2/FABP1/IP6K3/SIK1/PLEKHA4/PIGG/AGAP2/CISH/DAGLA/INPP4A/MBOAT7/GPX1/CDIPT/ABHD4/INPP1/SCARB1/VAC14/GPAT4/PLA2G2A/DDHD1/DGKH/NR1H2/SERINC2/PITPNM1/PLSCR1/GK/LPCAT1/SOCS1
liver	turquoise	BP	GO:0016125	sterol metabolic process	SEC14L2/CAT/FAXDC2/AKR1D1/ACADL/CYP39A1/EPHX2/CYP27A1/HMGCS2/CYP4V2/DGAT2/NFYC/GPAM/SORL1/CYP46A1/CYP7A1/SOD1/ACACB/SOAT2/APOA1/TM7SF2/FASN/APOA5/NFE2L1/FDXR/APOA2/LBR/SCARB1/PPARD/VLDLR/CYB5R3/CYP21A2
liver	turquoise	BP	GO:0098656	anion transmembrane transport	SLC38A3/SLC38A11/CLCN5/PRKAB2/SLC6A12/THRSP/SLC22A9/SLC25A10/SLC34A1/SLC23A1/SLC35A3/SLC26A1/ANO1/ARL6IP1/SLC38A4/ACACB/SLC25A42/SLC20A2/SLC46A1/SLC25A1/SLC17A1/SLC35A1/SLC25A20/SLC3A1/SLC19A1/SLC16A12/SLC12A6/SLC5A12/SLC16A11/SLC6A20/SLC26A8/SLC12A4/SLC4A11/SLC38A5/SLC6A9/SLC36A1/GABRR2/SLC37A1/SLC6A8/TTYH3/PRAF2/SLC25A19/CLIC1/BEST1/SLC16A3/SLC7A1/SLC7A6/SLC5A6/SLC38A1
liver	turquoise	BP	GO:0032869	cellular response to insulin stimulus	PCK2/PKLR/IRS1/ENPP1/GPLD1/PIK3R1/PDK2/NUCKS1/ATP6V0E2/SORL1/GSK3B/CPEB2/PDK4/SRD5A1/ENHO/TBC1D4/GCK/SESN3/AHSG/SOS1/PAK1/VWA2/ATP6V0A1/ATP6V0D1/INSR/CISH/IL1B/APPL2/SH2B2/TRIB3/GRB2/CCND3/PTPN2/BCAR1/ATP6V0B/PTPN1/SOCS1/RHOQ/SHC1
liver	turquoise	BP	GO:0019359	nicotinamide nucleotide biosynthetic process	DHTKD1/HAAO/PFKFB1/PKLR/OGDHL/ASPDH/ALDOB/QPRT/NADK2/GPD1/NMRK1/CBFA2T3/IDO2/GCK/GALK1/ARNT/HTR2A/NMNAT3/INSR/NUP62/HDAC4/PFKFB4/FOXK1/FOXK2/NUP188/HK2/PFKP/HIF1A/ALDOA
liver	turquoise	BP	GO:0019363	pyridine nucleotide biosynthetic process	DHTKD1/HAAO/PFKFB1/PKLR/OGDHL/ASPDH/ALDOB/QPRT/NADK2/GPD1/NMRK1/CBFA2T3/IDO2/GCK/GALK1/ARNT/HTR2A/NMNAT3/INSR/NUP62/HDAC4/PFKFB4/FOXK1/FOXK2/NUP188/HK2/PFKP/HIF1A/ALDOA
liver	turquoise	BP	GO:0006855	drug transmembrane transport	SLC38A3/SLC47A1/SLC25A10/SLC22A1/ARL6IP1/PDZK1/SLC17A3/SLC46A1/SLC25A1/SLC19A1/SLC16A12/ABCC2/SLC47A2/SLC22A2/SLC4A11/SLC6A8/PRAF2/SLC25A19/SLC7A1
liver	turquoise	BP	GO:0019674	NAD metabolic process	HAAO/PKLR/ASPDH/ALDOB/QPRT/NADK2/GPD1/NMRK1/NT5E/IDO2/GCK/NMNAT3/CD38/FOXK1/FOXK2/HK2/PFKP/ALDOA
liver	turquoise	BP	GO:0046718	viral entry into host cell	SLC10A1/CDHR3/SLC20A2/CD4/CXADR/HTR2A/TRIM26/ACE2/PTX3/IFITM1/TRIM59/ITGA5/NECTIN2/TRIM31/CLEC5A/SCARB1/TRIM8/ITGB5/ITGAV/DYNLT1/TRIM11/PVR/IFITM3/ICAM1/IFITM2
liver	turquoise	BP	GO:0051181	cofactor transport	SLC23A1/HRG/SLC25A42/SLC46A1/SLC25A20/SLC19A1/AMN/FOLR3/SLC9A3R1/FLVCR1/SLC25A19/LCN2/SLC5A6
liver	turquoise	BP	GO:0019722	calcium-mediated signaling	DMD/RGN/HOMER2/PDK2/TPCN2/LRRK2/AKAP6/CALML4/GSK3B/STIMATE/PLCG2/PTK2B/CAMK2D/PTGDR2/CD4/CHERP/NFATC2/CALM3/GRIN2B/PTPRJ/CALML3/CCR9/ACKR4/TMEM38A/GPR143/P2RX4/CCR7/JPH1/HDAC4/MCTP2/TRPM2/TRPM4/MCU/ACKR3/MAPK7/CCL20/CALM2/FKBP1A/ATP2B4
liver	turquoise	BP	GO:0055083	monovalent inorganic anion homeostasis	FGFR4/ENPP1/SLC34A1/SLC12A6/ABCC2/FGF23/SLC12A4/SLC9A3R1/SLC34A2
liver	turquoise	BP	GO:1902652	secondary alcohol metabolic process	SEC14L2/CAT/AKR1D1/ACADL/CYP39A1/EPHX2/CYP27A1/HMGCS2/DGAT2/NFYC/GPAM/SORL1/CYP46A1/CYP7A1/SOD1/ACACB/CYP3A4/SOAT2/APOA1/TM7SF2/FASN/APOA5/NFE2L1/FDXR/APOA2/LBR/SCARB1/PPARD/VLDLR/CYB5R3
liver	turquoise	BP	GO:0034404	nucleobase-containing small molecule biosynthetic process	DHTKD1/PFKFB1/PKLR/OGDHL/ASPDH/ENPP1/ALDOB/XDH/GPD1/NTHL1/ENPP3/NT5E/CBFA2T3/MLYCD/UNG/GCK/DNPH1/GALK1/ARNT/ADAL/HTR2A/GDA/MBD4/INSR/NUP62/PDE9A/GPX1/HDAC4/PFKFB4/FOXK1/FOXK2/NUP188/HK2/NME2/ENTPD4/PFKP/TYMP/UPP1/HIF1A/ALDOA
liver	turquoise	BP	GO:0000097	sulfur amino acid biosynthetic process	BHMT2/ADI1/BHMT/CDO1/GGT1/CBS/MTHFR
liver	turquoise	BP	GO:0006544	glycine metabolic process	GLYAT/AMT/PHGDH/GCAT/RIDA/SHMT2/SDSL
liver	turquoise	BP	GO:0034384	high-density lipoprotein particle clearance	GPLD1/APOM/APOC3/APOA1/APOA2/AMN/SCARB1
liver	turquoise	BP	GO:0046500	S-adenosylmethionine metabolic process	BHMT2/MAT1A/GNMT/MAT2B/GAMT/PEMT/MTHFR
liver	turquoise	BP	GO:0008203	cholesterol metabolic process	SEC14L2/CAT/AKR1D1/ACADL/CYP39A1/EPHX2/CYP27A1/HMGCS2/DGAT2/NFYC/GPAM/SORL1/CYP46A1/CYP7A1/SOD1/ACACB/SOAT2/APOA1/TM7SF2/FASN/APOA5/NFE2L1/FDXR/APOA2/LBR/SCARB1/PPARD/VLDLR/CYB5R3
liver	turquoise	BP	GO:0006707	cholesterol catabolic process	AKR1D1/CYP39A1/CYP27A1/CYP46A1/CYP7A1/SCARB1
liver	turquoise	BP	GO:0016127	sterol catabolic process	AKR1D1/CYP39A1/CYP27A1/CYP46A1/CYP7A1/SCARB1
liver	turquoise	BP	GO:0047484	regulation of response to osmotic stress	MICU1/SLC25A23/EFHD1/TRPV4/EPO/YBX3
liver	turquoise	BP	GO:0035384	thioester biosynthetic process	CBR4/GSTZ1/HSD17B8/GCDH/PDK2/PDK4/PDP2/ACACB/MLYCD/SLC25A1/FASN/ACSBG1/ACSS1/ELOVL1
liver	turquoise	BP	GO:0071616	acyl-CoA biosynthetic process	CBR4/GSTZ1/HSD17B8/GCDH/PDK2/PDK4/PDP2/ACACB/MLYCD/SLC25A1/FASN/ACSBG1/ACSS1/ELOVL1
liver	turquoise	BP	GO:1901685	glutathione derivative metabolic process	GSTZ1/GSTK1/GSTA1/AKR1A1/GSTA4/MGST2/GSTA2/GSTM4
liver	turquoise	BP	GO:1901687	glutathione derivative biosynthetic process	GSTZ1/GSTK1/GSTA1/AKR1A1/GSTA4/MGST2/GSTA2/GSTM4
liver	turquoise	BP	GO:0046626	regulation of insulin receptor signaling pathway	IRS1/ENPP1/PIK3R1/NUCKS1/SORL1/ENHO/SESN3/AHSG/PAK1/VWA2/CISH/IL1B/CCND3/PTPN2/PTPN1/SOCS1
liver	turquoise	BP	GO:0016051	carbohydrate biosynthetic process	SORD/PCK2/PFKFB1/RGN/GYS2/IRS1/ENPP1/SLC25A10/GPER1/CHST13/ALDOB/PDK2/AKR1A1/DGAT2/GPD1/GNMT/RBP4/GSK3B/PTK2B/UGP2/GCK/SLC25A1/PPP1R3B/B3GNT2/SIK1/INSR/NDST1/ST3GAL4/PHKG1/SLC2A1/FOXK1/FOXK2/B3GNT5/B4GALT5/PTPN2/EXT1/ALDOA/GYG1
liver	turquoise	BP	GO:0002064	epithelial cell development	SMO/EPB41L5/AR/RAP2C/ARID4A/ESR1/EXPH5/ONECUT2/COL18A1/GSK3B/SOD1/WNT5B/KDF1/SEC24B/HNF4A/C1GALT1/FASN/LRTOMT/WNT5A/IHH/CCM2/VEZF1/ST14/IL1B/COL23A1/GPX1/S1PR2/RAPGEF1/DLL1/GPAT4/SLC9A3R1/PLOD3/CDKN1A/TNFRSF1A/HIF1A/ICAM1/MSN
liver	turquoise	BP	GO:0006733	oxidoreduction coenzyme metabolic process	DHTKD1/HAAO/PFKFB1/DCXR/PKLR/OGDHL/ASPDH/IDH1/ALDOB/QPRT/NADK2/GPD1/COQ5/NMRK1/NT5E/CBFA2T3/IDO2/GCK/GALK1/ARNT/HTR2A/NMNAT3/FDXR/PPTC7/INSR/NUP62/HDAC4/CD38/RPIA/PFKFB4/FOXK1/FOXK2/NUP188/HK2/PFKP/HIF1A/ALDOA
liver	turquoise	BP	GO:0006730	one-carbon metabolic process	SFXN1/MAT1A/ALDH1L1/GNMT/MAT2B/SHMT2/MTHFR/MTHFD2/MTHFD1L
liver	turquoise	BP	GO:0060402	calcium ion transport into cytosol	LIME1/DMD/GPER1/TPCN2/AKAP6/DRD1/ADRA1A/PLCG2/PTK2B/CAMK2D/CD4/CHERP/CALM3/FYN/GRIN2B/HTR2A/CX3CL1/TMEM38A/P2RX4/CCR7/JPH1/FAM155B/F2RL3/EPO/TRPM2/ERO1A/CALM2/BAK1/FKBP1A/ATP2B4
liver	turquoise	BP	GO:1903901	negative regulation of viral life cycle	IFIT1/TRIM26/OAS1/EIF2AK2/RSAD2/PTX3/TNIP1/IFITM1/TRIM59/TRIM15/TRIM31/ILF3/TRIM8/TRIM28/TRIM11/PLSCR1/IFITM3/IFITM2/ISG20
liver	turquoise	BP	GO:0098754	detoxification	CAT/IYD/ADH4/RGN/GSTZ1/ACAA1/GSTK1/GSTA1/ABCG2/PRXL2A/AKR1A1/MGST2/SOD1/MARC1/APOM/AKR7A3/FANCC/ABCC2/RDH12/FABP1/TXNRD2/PRXL2B/GPX1/MT1A/GPX3/SOD2
liver	turquoise	BP	GO:0071346	cellular response to interferon-gamma	GBP7/CCL16/CCL15/VPS26B/CAMK2D/PIAS1/TRIM34/TRIM26/WNT5A/CX3CL1/CAMK2B/PARP14/ASS1/OAS1/TRIM68/SP100/TRIM31/IRF4/STXBP1/NLRC5/ACTG1/TRIM8/SIRPA/FCGR1A/IFNGR2/NR1H2/RAB43/CCL20/PTPN2/SOCS1/ICAM1/HLA-E/IFNGR1
liver	turquoise	BP	GO:0045833	negative regulation of lipid metabolic process	ACADL/ETFBKMT/GPER1/GPLD1/DGAT2/FMC1/SORL1/CYP7A1/SOD1/ACACB/ENHO/APOC3/SNAI2/APOA2/SIK1/IL1B/APPL2/TRIB3/CRTC3/LPCAT1
liver	turquoise	BP	GO:0006576	cellular biogenic amine metabolic process	DMGDH/AADAT/HAAO/HNMT/ALDH7A1/SARDH/BHMT/NAPEPLD/OAZ2/GCDH/PAOX/DBH/IDO2/HDC
liver	turquoise	BP	GO:0051701	interaction with host	SLC10A1/IFIT1/CDHR3/CDH1/SLC20A2/CD4/CXADR/HTR2A/TRIM26/ACE2/EIF2AK2/CTNND1/PTX3/TNIP1/IFITM1/INSR/TRIM59/ITGA5/NECTIN2/TRIM15/TRIM31/CLEC5A/VPS4A/SCARB1/TRIM8/ITGB5/TRIM28/GRB2/SERPINB9/BCL2L1/ITGAV/DYNLT1/TRIM11/PVR/IFITM3/ICAM1/IFITM2
liver	turquoise	CC	GO:0044438	microbody part	ACOX2/AMACR/PECR/GRHPR/CAT/PEX11G/DAO/ECI2/EHHADH/ACOX1/PXMP2/ALDH3A2/EPHX2/ACAA1/GSTK1/HAO2/DHRS4/IDH1/PHYH/PEX14/PIPOX/HMGCL/TMEM135/PXMP4/PAOX/MLYCD/ABCD3/FNDC5/PEX16/PEX10/ECH1/MPV17L/ACOT6/FABP1/MPV17
liver	turquoise	CC	GO:0044439	peroxisomal part	ACOX2/AMACR/PECR/GRHPR/CAT/PEX11G/DAO/ECI2/EHHADH/ACOX1/PXMP2/ALDH3A2/EPHX2/ACAA1/GSTK1/HAO2/DHRS4/IDH1/PHYH/PEX14/PIPOX/HMGCL/TMEM135/PXMP4/PAOX/MLYCD/ABCD3/FNDC5/PEX16/PEX10/ECH1/MPV17L/ACOT6/FABP1/MPV17
liver	turquoise	CC	GO:0005782	peroxisomal matrix	ACOX2/AMACR/GRHPR/CAT/DAO/ECI2/EHHADH/ACOX1/EPHX2/ACAA1/GSTK1/HAO2/DHRS4/IDH1/PHYH/PIPOX/HMGCL/PAOX/MLYCD/ABCD3/ECH1/ACOT6/FABP1
liver	turquoise	CC	GO:0031907	microbody lumen	ACOX2/AMACR/GRHPR/CAT/DAO/ECI2/EHHADH/ACOX1/EPHX2/ACAA1/GSTK1/HAO2/DHRS4/IDH1/PHYH/PIPOX/HMGCL/PAOX/MLYCD/ABCD3/ECH1/ACOT6/FABP1
liver	turquoise	CC	GO:0005777	peroxisome	ACOX2/AMACR/PECR/GRHPR/CAT/PEX11G/DAO/ECI2/EHHADH/ACOX1/PXMP2/ALDH3A2/EPHX2/ACAA1/GSTK1/HAO2/DHRS4/IDH1/PHYH/PEX14/XDH/PIPOX/HMGCL/RIDA/TMEM135/PXMP4/ZADH2/PAOX/SOD1/MLYCD/ABCD3/FNDC5/PEX16/PEX10/ECH1/MPV17L/ACOT6/FABP1/MPV17
liver	turquoise	CC	GO:0042579	microbody	ACOX2/AMACR/PECR/GRHPR/CAT/PEX11G/DAO/ECI2/EHHADH/ACOX1/PXMP2/ALDH3A2/EPHX2/ACAA1/GSTK1/HAO2/DHRS4/IDH1/PHYH/PEX14/XDH/PIPOX/HMGCL/RIDA/TMEM135/PXMP4/ZADH2/PAOX/SOD1/MLYCD/ABCD3/FNDC5/PEX16/PEX10/ECH1/MPV17L/ACOT6/FABP1/MPV17
liver	turquoise	CC	GO:0005903	brush border	MME/DCXR/SLC2A2/SLC34A1/ESPN/SLC15A1/PDZK1/SLC17A3/SLC46A1/SOAT2/ANKS4B/PEMT/SLC3A1/ACE2/ABCC2/AMN/PDZD3/GIPC1/CA4/KCNK1/SLC9A3R1/SLC34A2/GNA12/CLIC1/FLII/ACTN1/SLC5A6
liver	turquoise	CC	GO:0005759	mitochondrial matrix	DHTKD1/DMGDH/AADAT/ALDH5A1/GLYAT/ACADL/AMT/ETFBKMT/HOGA1/CBR4/PCK2/HAGH/SIRT3/GSTZ1/SIRT5/SUOX/BDH1/IVD/CYP27A1/OGDHL/HADH/ALDH7A1/DNAJC19/GSTK1/SARDH/ACSM2A/ACSM2B/ACADSB/ACSF2/HSD17B8/HMGCS2/OTC/ACSM5/GCDH/PDK2/NADK2/ECHS1/HMGCL/LRRK2/ACAD10/ACP6/RIDA/SDHAF4/COQ5/ACADS/ABHD10/PDK4/SOD1/LIPT2/PDP2/GLRX5/MLYCD/TARS2/TST/BCO2/MRPL43/MCEE/ECI1/SMDT1/TFB1M/MRPS24/NMNAT3/FDXR/ACSM1/PPTC7/TXNRD2/SHMT2…
liver	turquoise	CC	GO:0045177	apical part of cell	MPDZ/CLCN5/SLC17A4/CYP4A11/MREG/CYP4F12/ABCC6/SLC2A2/ACY3/CYP4F2/DSG1/USH2A/HOMER2/SLC34A1/CDH2/LMO7/SLC23A1/AKR1A1/ENPP3/ANO1/SORBS2/SPTBN2/MAL2/TF/ABCG8/PDZK1/PLD1/CNKSR3/GNAT1/SLC17A3/SHROOM2/NUMB/PKHD1/REEP6/SLC46A1/IL6R/SLC17A1/PATJ/SLC29A1/SLC19A1/ABCB11/ABCC2/TRPV4/SLC5A12/AQP6/AMN/FABP1/GPR143/RAB27B/PDZD3/SLC6A20/UPK1A/ATP6V0D1/MTCL1/SLC39A4/HAMP/MUC1/SLC2A5/CA4/PCM1/KCNK1/DLL1/SLC2A1/MU…
liver	turquoise	CC	GO:0016324	apical plasma membrane	MPDZ/SLC17A4/CYP4A11/MREG/CYP4F12/ABCC6/SLC2A2/ACY3/CYP4F2/DSG1/USH2A/SLC34A1/CDH2/LMO7/SLC23A1/AKR1A1/ENPP3/ANO1/SORBS2/SPTBN2/MAL2/TF/ABCG8/PDZK1/PLD1/CNKSR3/GNAT1/SLC17A3/SHROOM2/PKHD1/SLC46A1/IL6R/SLC17A1/PATJ/SLC29A1/SLC19A1/ABCC2/TRPV4/SLC5A12/AQP6/AMN/GPR143/RAB27B/SLC6A20/UPK1A/ATP6V0D1/MTCL1/SLC39A4/MUC1/SLC2A5/CA4/KCNK1/DLL1/SLC2A1/MUC13/SLC9A3R1/SLC34A2/PTPRH/STX3/OSMR/MSN
liver	turquoise	CC	GO:0098862	cluster of actin-based cell projections	MME/DCXR/SLC2A2/USH2A/HOMER2/SLC34A1/ESPN/SLC15A1/PDZK1/SLC17A3/MYO15A/SLC46A1/ESPNL/SOAT2/ANKS4B/PEMT/SLC3A1/CDH23/ACE2/ABCC2/AMN/CDC14A/PDZD3/MYO3A/RHOC/GIPC1/CA4/KCNK1/SLC9A3R1/SLC34A2/GNA12/CLIC1/FLII/ACTN1/SLC5A6
liver	turquoise	CC	GO:0005778	peroxisomal membrane	PECR/CAT/PEX11G/DAO/ACOX1/PXMP2/ALDH3A2/DHRS4/PEX14/TMEM135/PXMP4/ABCD3/FNDC5/PEX16/PEX10/MPV17L/MPV17
liver	turquoise	CC	GO:0031903	microbody membrane	PECR/CAT/PEX11G/DAO/ACOX1/PXMP2/ALDH3A2/DHRS4/PEX14/TMEM135/PXMP4/ABCD3/FNDC5/PEX16/PEX10/MPV17L/MPV17
liver	turquoise	CC	GO:0030672	synaptic vesicle membrane	RAB26/LRRK2/SNAP47/SVOP/CALM3/BSN/SYPL2/SYT1/RAB27B/OTOF/SYT12/SEMA4C/SLC30A3/MCTP2/RAB3C/SLC6A9/STX6/TMEM163/BCL2L1/DTNBP1/SYN1/SYNGR2/CLTB/RAB35
liver	turquoise	CC	GO:0099501	exocytic vesicle membrane	RAB26/LRRK2/SNAP47/SVOP/CALM3/BSN/SYPL2/SYT1/RAB27B/OTOF/SYT12/SEMA4C/SLC30A3/MCTP2/RAB3C/SLC6A9/STX6/TMEM163/BCL2L1/DTNBP1/SYN1/SYNGR2/CLTB/RAB35
liver	turquoise	CC	GO:0031526	brush border membrane	SLC34A1/PDZK1/SLC17A3/SLC46A1/PEMT/SLC3A1/ACE2/ABCC2/AMN/CA4/KCNK1/SLC9A3R1/SLC34A2/GNA12/SLC5A6
liver	turquoise	CC	GO:0016323	basolateral plasma membrane	SLC38A3/SLC10A1/ABCC6/SLC39A5/SLC22A9/ENPP1/CDH2/RHBG/SLC23A1/SLCO1B3/SLC26A1/SLC22A1/TF/DLG2/ATP7B/NUMB/IL6R/CXADR/SLC29A1/SLC19A1/SLC12A6/DISP1/ST14/OTOF/SLC4A11/NAIP/TRPC4/CD38/SLC2A1/SLC41A1/ADAM9/NOD2/C5AR1/FLOT2/BEST1/SLC7A6/ATP2B4/MSN/FLOT1
liver	turquoise	MF	GO:0050662	coenzyme binding	ACOX2/FMO3/DHTKD1/GRHPR/SORD/CAT/IYD/AADAT/DAO/FMO5/ECI2/FMO4/ACADL/ADH4/ACOX1/CBR4/SIRT3/SIRT5/LDHD/SUOX/IVD/BDH2/OGDHL/HADH/QDPR/PANK1/HAO2/ASPDH/ACADSB/HSD17B8/IDH1/CRYL1/PHYH/XDH/GCDH/PRODH2/GPT/GPD1/HMGCL/PHGDH/GNMT/GCAT/ACAD10/MMACHC/ACADS/DBH/MARC1/ACACB/ALDH1A1/SRD5A1/ACOT12/SOAT2/HSD11B2/NQO2/PARP15/TM7SF2/FASN/CRYZL1/CBS/PNPLA3/TXNRD2/LBR/HDC/ALDH1A3/SHMT2/SDSL/MTHFR/STEAP4/TSTA3/GMDS/P…
liver	turquoise	MF	GO:0004497	monooxygenase activity	FMO3/FAXDC2/FMO5/FMO4/AKR1D1/CYP4A11/CYP2C9/PAH/CYP4F12/CYP39A1/CYP4F2/CYP27A1/CYP4A22/CYP4X1/CYP2C8/CYP3A43/CYP4V2/CYP2J2/CYP2A6/CYP1A2/CYP46A1/DBH/CYP7A1/CYP2C19/CYP3A4/CYP4F3/PCBD1/CYP3A5/CYP2A7/CYP2G1P/CYP3A7/CYP2B6/CYP1A1/CYP2E1/CYP2A13/CYP27C1/CYP21A2
liver	turquoise	MF	GO:0008391	arachidonic acid monooxygenase activity	CYP4A11/CYP2C9/CYP4F12/CYP4F2/CYP2C8/CYP2J2/CYP2A6/CYP2C19/CYP2A7/CYP2G1P/CYP2B6/CYP1A1/CYP2E1/CYP2A13
liver	turquoise	MF	GO:0008395	steroid hydroxylase activity	CYP2C9/CYP39A1/CYP27A1/CYP2C8/CYP3A43/CYP2J2/CYP2A6/CYP1A2/CYP46A1/CYP7A1/CYP2C19/CYP3A4/CYP3A5/CYP2A7/CYP2G1P/CYP3A7/CYP2B6/CYP1A1/CYP2E1/CYP2A13/CYP21A2
liver	turquoise	MF	GO:0016614	oxidoreductase activity, acting on CH-OH group of donors	ADH6/GRHPR/SORD/ADH1B/EHHADH/AKR1D1/ADH4/CBR4/ADH1C/DCXR/ALDH3A2/LDHD/BDH1/BDH2/HADH/CYP4A22/HAO2/DHRS4/HSD17B8/SRD5A2/IDH1/CRYL1/ADH1A/AKR1A1/PTGR2/GPD1/CBR1/PHGDH/ZADH2/RDH5/HSD17B14/AKR7A2/HSD11B2/AKR7A3/FASN/ADH7/DHRS11/HSD3B1/RDH12/PRXL2B/DHDH/TSTA3
liver	turquoise	MF	GO:0016616	oxidoreductase activity, acting on the CH-OH group of donors, NAD or NADP as acceptor	ADH6/GRHPR/SORD/ADH1B/EHHADH/AKR1D1/ADH4/CBR4/ADH1C/DCXR/LDHD/BDH1/BDH2/HADH/CYP4A22/DHRS4/HSD17B8/SRD5A2/IDH1/CRYL1/ADH1A/AKR1A1/PTGR2/GPD1/CBR1/PHGDH/ZADH2/RDH5/HSD17B14/AKR7A2/HSD11B2/AKR7A3/FASN/ADH7/DHRS11/HSD3B1/RDH12/PRXL2B/DHDH/TSTA3
liver	turquoise	MF	GO:0008392	arachidonic acid epoxygenase activity	CYP4A11/CYP2C9/CYP4F12/CYP4F2/CYP2C8/CYP2J2/CYP2A6/CYP2C19/CYP2A7/CYP2G1P/CYP2B6/CYP2E1/CYP2A13
liver	turquoise	MF	GO:0005342	organic acid transmembrane transporter activity	SLC6A1/SLC38A3/SLC38A11/SLC17A4/SFXN5/SLC6A13/SLC6A12/SLC10A1/SLC16A2/SLC22A9/SLC25A10/SFXN1/SLCO2B1/SLC23A1/SLCO1B3/SLC26A1/SLC17A3/SLC38A4/SLCO1B7/SLC46A1/SLCO1A2/SLC16A4/SLC25A1/SLC17A1/SLC35A1/SLC13A2/SLC16A13/SLC3A1/SLC19A1/ABCB11/SLC16A12/ABCC2/SLC5A12/SLC16A11/SLC6A20/SLC26A8/SLC38A5/SLC6A9/SLC36A1/SLC16A5/SLC16A6/SLC6A8/SLC16A3/SLC7A1/SLC7A6/SLC38A1
liver	turquoise	MF	GO:0046943	carboxylic acid transmembrane transporter activity	SLC6A1/SLC38A3/SLC38A11/SLC17A4/SFXN5/SLC6A13/SLC6A12/SLC10A1/SLC16A2/SLC22A9/SLC25A10/SFXN1/SLCO2B1/SLC23A1/SLCO1B3/SLC26A1/SLC17A3/SLC38A4/SLCO1B7/SLC46A1/SLCO1A2/SLC16A4/SLC25A1/SLC17A1/SLC35A1/SLC13A2/SLC16A13/SLC3A1/SLC19A1/ABCB11/SLC16A12/ABCC2/SLC5A12/SLC16A11/SLC6A20/SLC26A8/SLC38A5/SLC6A9/SLC36A1/SLC16A5/SLC16A6/SLC6A8/SLC16A3/SLC7A1/SLC7A6/SLC38A1
liver	turquoise	MF	GO:0015291	secondary active transmembrane transporter activity	SLC6A1/SLC38A3/CLCN5/SLC17A4/SLC6A13/SLC6A12/SLC10A1/SLC47A1/SLC16A2/SLC22A9/SLC25A10/SLC34A1/SLCO2B1/SLC23A1/SLC5A9/SLCO1B3/SLC26A1/SLC15A1/SLC22A1/SLC17A3/MFSD3/SLC38A4/SLC45A3/SLC28A2/SLCO1B7/SLC20A2/SLCO1A2/SLC16A4/SLC25A1/SLC17A1/SLC35A1/SLC13A2/SLC16A13/SLC2A12/SLC19A1/SLC16A12/SLC12A6/SLC5A12/SLC16A11/SLC47A2/SLC6A20/SLC26A8/SLC12A4/SLC4A11/SLC28A3/SLC35E4/SLC6A9/SLC36A1/SLC16A5/SLC16A6/SL…
liver	turquoise	MF	GO:0016712	oxidoreductase activity, acting on paired donors, with incorporation or reduction of molecular oxygen, reduced flavin or flavoprotein as one donor, and incorporation of one atom of oxygen	CYP2C9/CYP4F12/CYP4X1/CYP2C8/CYP3A43/CYP2J2/CYP2A6/CYP1A2/CYP2C19/CYP3A4/CYP3A5/CYP2A7/CYP2G1P/CYP3A7/CYP2B6/CYP1A1/CYP2E1/CYP2A13
liver	turquoise	MF	GO:0022804	active transmembrane transporter activity	SLC6A1/SLC38A3/CLCN5/SLC17A4/SLC6A13/SLC6A12/SLC10A1/SLC47A1/ABCC6/SLC16A2/ABCA6/SLC22A9/ABCG2/SLC25A10/SLC34A1/SLCO2B1/SLC23A1/SLC5A9/SLCO1B3/SLC26A1/SLC15A1/SLC22A1/ATP6V0E2/ABCA8/ABCG8/SLC17A3/MFSD3/SLC38A4/SLC45A3/ATP7B/SLC28A2/SLCO1B7/SLC20A2/ABCA10/SLCO1A2/ABCD3/SLC16A4/SLC25A1/SLC17A1/SLC35A1/SLC13A2/SLC16A13/SLC2A12/SLC19A1/ABCB11/SLC16A12/SLC12A6/ABCC2/SLC5A12/SLC16A11/SLC47A2/ATP6V0A1/T…
liver	turquoise	MF	GO:0008514	organic anion transmembrane transporter activity	SLC6A1/SLC38A3/SLC38A11/SLC17A4/SFXN5/SLC6A13/SLC6A12/SLC10A1/SLC2A2/SLC16A2/SLC22A9/TMEM30B/SLC25A10/SFXN1/SLCO2B1/SLC23A1/SLC35A3/SLCO1B3/SLC26A1/SLC17A3/SLC25A23/SLC38A4/SLCO1B7/SLC25A42/SLC46A1/SLCO1A2/SLC16A4/SLC25A1/SLC17A1/SLC35A1/SLC13A2/SLC16A13/SLC3A1/SLC19A1/ABCB11/SLC16A12/ABCC2/SLC5A12/SLC16A11/SLC6A20/SLC26A8/SLC4A11/SLC38A5/SLC2A1/SLC6A9/SLC36A1/SLC16A5/SLC16A6/SLC6A8/SLC25A19/SLC1…
liver	turquoise	MF	GO:0016705	oxidoreductase activity, acting on paired donors, with incorporation or reduction of molecular oxygen	FMO3/FAXDC2/FMO5/FMO4/AKR1D1/CYP4A11/BBOX1/CYP2C9/PAH/CYP4F12/CYP39A1/CYP4F2/CYP27A1/CYP4A22/CYP4X1/CYP2C8/PHYH/CYP3A43/CYP4V2/CYP2J2/CYP2A6/CYP1A2/CYP46A1/DBH/CYP7A1/CYP2C19/CYP3A4/CYP4F3/PCBD1/KDM4A/CYP3A5/CYP2A7/CYP2G1P/CYP3A7/CYP2B6/CYP1A1/CYP2E1/CYP2A13/CYP27C1/KDM4B/PLOD3/HSPBAP1/PLOD2/CYP21A2
liver	turquoise	MF	GO:0015293	symporter activity	SLC6A1/SLC38A3/SLC17A4/SLC6A13/SLC6A12/SLC10A1/SLC16A2/SLC34A1/SLC23A1/SLC5A9/SLC15A1/SLC22A1/SLC17A3/MFSD3/SLC38A4/SLC45A3/SLC28A2/SLC20A2/SLC16A4/SLC17A1/SLC13A2/SLC16A13/SLC2A12/SLC16A12/SLC12A6/SLC5A12/SLC16A11/SLC6A20/SLC12A4/SLC4A11/SLC28A3/SLC6A9/SLC36A1/SLC16A5/SLC16A6/SLC34A2/SLC6A8/SLC10A3/SLC16A3/SLC5A6/SLC38A1
liver	turquoise	MF	GO:0005506	iron ion binding	FAXDC2/HAAO/CYP4A11/BBOX1/CYP2C9/PAH/CYP4F12/CYP39A1/ADI1/CYP4F2/CYP27A1/CYP4A22/CYP4X1/CYP2C8/PHYH/XDH/CYP3A43/CYP4V2/CYP2J2/TF/CYP2A6/CYP1A2/CYP46A1/CYP7A1/CYP2C19/CYP3A4/CYP4F3/CYP3A5/CYP2A7/CDO1/CYP2G1P/CYP3A7/CYP2B6/CYP1A1/CYP2E1/CYP2A13/CYP27C1/PLOD3/PLOD2/LCN2/CYP21A2
liver	turquoise	MF	GO:0016627	oxidoreductase activity, acting on the CH-CH group of donors	ACOX2/PECR/AKR1D1/ACADL/ACOX1/IVD/BDH2/ACAA1/ACADSB/SRD5A2/GCDH/PTGR2/CPOX/ACAD10/ZADH2/SDHAF4/ACADS/SRD5A1/TM7SF2/FASN/LBR/DHDH
liver	turquoise	MF	GO:0008028	monocarboxylic acid transmembrane transporter activity	SLC6A1/SLC38A3/SLC6A13/SLC6A12/SLC10A1/SLC16A2/SLC22A9/SLCO2B1/SLCO1B3/SLCO1B7/SLCO1A2/SLC16A4/SLC16A13/ABCB11/SLC16A12/SLC5A12/SLC16A11/SLC16A5/SLC16A6/SLC16A3
liver	turquoise	MF	GO:0020037	heme binding	CAT/CYP4A11/CYP2C9/CYP4F12/CYP39A1/SUOX/CYP4F2/CYP27A1/CYB5D2/CYP4A22/CYP4X1/CYP2C8/CYP3A43/CYP4V2/CYP2J2/CYP2A6/CYP1A2/CYP46A1/CYP7A1/CYP2C19/CYP3A4/HRG/CYP4F3/IDO2/CYP3A5/CYP2A7/CYP2G1P/CYP3A7/CYP2B6/CYP1A1/CYP2E1/CYP2A13/CBS/CYP27C1/STEAP4/FLVCR1/CYP21A2
liver	turquoise	MF	GO:0046906	tetrapyrrole binding	CAT/CYP4A11/CYP2C9/CYP4F12/CYP39A1/SUOX/CYP4F2/CYP27A1/CYB5D2/CYP4A22/CYP4X1/CYP2C8/CYP3A43/CYP4V2/CYP2J2/MMACHC/CYP2A6/CYP1A2/CYP46A1/CYP7A1/CYP2C19/CYP3A4/HRG/CYP4F3/IDO2/CYP3A5/CYP2A7/CYP2G1P/CYP3A7/CYP2B6/CYP1A1/CYP2E1/CYP2A13/CBS/CYP27C1/STEAP4/FLVCR1/CYP21A2
liver	turquoise	MF	GO:0008509	anion transmembrane transporter activity	SLC6A1/SLC38A3/SLC38A11/CLCN5/SLC17A4/SFXN5/SLC6A13/SLC6A12/SLC10A1/SLC2A2/SLC16A2/SLC22A9/TMEM30B/SLC25A10/SFXN1/SLC34A1/SLCO2B1/SLC23A1/SLC35A3/SLCO1B3/SLC26A1/ANO1/SLC22A1/SLC17A3/SLC25A23/SLC38A4/SLCO1B7/SLC25A42/SLC46A1/SLCO1A2/SLC16A4/SLC25A1/SLC17A1/SLC35A1/SLC13A2/SLC16A13/SLC3A1/SLC19A1/ABCB11/SLC16A12/SLC12A6/ABCC2/SLC5A12/AQP6/SLC16A11/SLC6A20/SLC26A8/SLC12A4/SLC4A11/MFSD5/SLC38A5/SLC2…
liver	turquoise	MF	GO:0016725	oxidoreductase activity, acting on CH or CH2 groups	ACOX2/CYP2C9/CYP2C8/XDH/CYP3A43/CYP1A2/CYP3A4/CYP3A5/CYP3A7
liver	turquoise	MF	GO:0015294	solute:cation symporter activity	SLC6A1/SLC17A4/SLC6A13/SLC6A12/SLC10A1/SLC34A1/SLC23A1/SLC5A9/SLC15A1/SLC22A1/SLC17A3/MFSD3/SLC45A3/SLC28A2/SLC20A2/SLC13A2/SLC2A12/SLC12A6/SLC5A12/SLC6A20/SLC12A4/SLC28A3/SLC6A9/SLC36A1/SLC34A2/SLC6A8/SLC5A6/SLC38A1
liver	turquoise	MF	GO:0016709	oxidoreductase activity, acting on paired donors, with incorporation or reduction of molecular oxygen, NAD(P)H as one donor, and incorporation of one atom of oxygen	FMO3/FAXDC2/FMO5/FMO4/AKR1D1/CYP4A11/CYP4F12/CYP4F2/CYP27A1/CYP4A22/CYP46A1/CYP7A1/CYP4F3/CYP1A1/CYP2E1
liver	turquoise	MF	GO:0016645	oxidoreductase activity, acting on the CH-NH group of donors	DMGDH/SARDH/QDPR/PRODH2/PIPOX/ALDH1L1/PAOX/PYCR1/MTHFR/PYCR2/MTHFD2/MTHFD1L
liver	turquoise	MF	GO:0051287	NAD binding	GRHPR/SORD/ADH4/SIRT3/SIRT5/BDH2/HADH/QDPR/HSD17B8/IDH1/CRYL1/GPD1/PHGDH/ALDH1A1/HSD11B2/PARP15/ALDH1A3/CYB5R3
liver	turquoise	MF	GO:0015370	solute:sodium symporter activity	SLC6A1/SLC17A4/SLC6A13/SLC6A12/SLC10A1/SLC34A1/SLC23A1/SLC5A9/SLC22A1/SLC17A3/SLC28A2/SLC20A2/SLC13A2/SLC5A12/SLC6A20/SLC28A3/SLC6A9/SLC34A2/SLC6A8/SLC5A6/SLC38A1
liver	turquoise	MF	GO:0072341	modified amino acid binding	MME/ANXA9/HMGB1/GNMT/MMACHC/GSTM4/SLC46A1/FASN/CPNE6/ANXA13/SLC19A1/CBS/SYT1/GPR143/APPL2/FOLR3/SYT3/SYT12/GSDMD/MTHFR/SCARB1/CD300LF/PLEKHN1/TLN1
liver	turquoise	MF	GO:0016628	oxidoreductase activity, acting on the CH-CH group of donors, NAD or NADP as acceptor	PECR/AKR1D1/BDH2/SRD5A2/PTGR2/ZADH2/SRD5A1/TM7SF2/FASN/LBR/DHDH
liver	turquoise	MF	GO:0019842	vitamin binding	DHTKD1/SEC14L2/RBP5/AADAT/ADH4/AFM/OGDHL/PHYH/GPT/GNMT/GCAT/MMACHC/TTPA/RBP4/DBH/MARC1/ACACB/SLC46A1/LRAT/FASN/SLC19A1/ADH7/CBS/CYP27C1/HDC/SHMT2/FOLR3/SDSL/PLOD3/VDR/PLOD2/PDXK
liver	turquoise	MF	GO:0050661	NADP binding	FMO3/GRHPR/CAT/FMO5/FMO4/CBR4/QDPR/ASPDH/IDH1/SRD5A1/TM7SF2/FASN/CRYZL1/LBR/MTHFR/GMDS
liver	turquoise	MF	GO:0050660	flavin adenine dinucleotide binding	ACOX2/FMO3/DAO/FMO5/FMO4/ACADL/ACOX1/LDHD/IVD/ACADSB/XDH/GCDH/PRODH2/ACAD10/MMACHC/ACADS/NQO2/TXNRD2/MTHFR/STEAP4/CYB5R3
liver	turquoise	MF	GO:1901505	carbohydrate derivative transmembrane transporter activity	SLC17A4/SLC35A3/SLC17A3/SLC25A23/SLC28A2/SLC25A42/SLC17A1/SLC35A1/SLC29A1/SLC50A1/SLC28A3/SLC35E4/SLC37A1/SLC35C1
liver	turquoise	MF	GO:0015081	sodium ion transmembrane transporter activity	SLC6A1/SLC17A4/SLC6A13/HCN3/SLC6A12/SLC10A1/SLC34A1/SLC23A1/SLC5A9/SLC22A1/SCN8A/SLC17A3/SHROOM2/SLC28A2/SLC20A2/SCN11A/SLC13A2/ABCB11/SLC5A12/SLC6A20/SCN3B/SLC4A11/SLC28A3/KCNK1/SLC6A9/TRPM2/SLC34A2/SLC41A1/SCN1B/SLC6A8/SLC5A6/SLC38A1
liver	turquoise	MF	GO:0005496	steroid binding	GRAMD1C/SULT1E1/AKR1D1/AR/NR3C2/ESR1/GPER1/PAQR7/RORC/CYP3A4/APOC3/SOAT2/APOA1/HSD11B2/APOA5/NFE2L1/PAQR9/APOA2/TSPO/ESR2/VDR/CYP21A2/GRAMD1A
liver	turquoise	MF	GO:0003707	steroid hormone receptor activity	AR/NR3C2/NR1I3/ESR1/NR1I2/GPER1/PAQR7/RORC/THRB/HNF4A/NR1D2/RXRG/PPARD/ESR2/VDR/NR1H2
liver	turquoise	MF	GO:0016863	intramolecular oxidoreductase activity, transposing C=C bonds	ECI2/EHHADH/GSTA1/ECI1/DCT/ECH1/HSD3B1
liver	turquoise	MF	GO:0016811	hydrolase activity, acting on carbon-nitrogen (but not peptide) bonds, in linear amides	UPB1/CAT/ASPA/NIT2/SIRT3/SIRT5/ACY3/NIT1/PGLYRP2/HDAC3/ACR/HDAC11/HDAC4/ACER2/BRMS1/VNN2/SAP30/MIER2/ASRGL1
liver	turquoise	MF	GO:0071949	FAD binding	ACOX2/DAO/ACOX1/LDHD/XDH/PRODH2/MMACHC/NQO2/MTHFR/STEAP4/CYB5R3
liver	turquoise	MF	GO:0031406	carboxylic acid binding	ACOX2/GRHPR/ACOX1/OXER1/OTC/DPYS/PHYH/SERPINA5/HMGCL/GNMT/RIDA/HAPLN4/DBH/ACACB/SLC46A1/SESN3/HNF4A/DDAH1/LRAT/GRIN2B/SLC19A1/ASS1/FABP1/UGT1A7/GPR143/CYP27C1/SHMT2/FOLR3/TNFAIP6/HAPLN3/PPARD/PLOD3/PRR7/VDR/STX3/PLOD2/VCAN/NME2
liver	turquoise	MF	GO:0016810	hydrolase activity, acting on carbon-nitrogen (but not peptide) bonds	UPB1/CAT/ASPA/NIT2/SIRT3/SIRT5/ACY3/NIT1/DPYS/PGLYRP2/OPLAH/DDAH1/ADAL/HDAC3/ACR/GDA/HDAC11/CD101/HDAC4/ADAT3/ACER2/BRMS1/VNN2/SAP30/MIER2/MTHFD2/ASRGL1
liver	turquoise	MF	GO:0003995	acyl-CoA dehydrogenase activity	ACADL/IVD/ACADSB/GCDH/ACAD10/ACADS
liver	turquoise	MF	GO:0005343	organic acid:sodium symporter activity	SLC6A1/SLC6A13/SLC6A12/SLC10A1/SLC23A1/SLC13A2/SLC5A12/SLC6A9/SLC6A8/SLC38A1
liver	turquoise	MF	GO:0046873	metal ion transmembrane transporter activity	SLC6A1/SLC17A4/SLC6A13/HCN3/SLC6A12/KCNN2/SLC10A1/MRS2/SLC39A5/SLC34A1/SLC23A1/SLC5A9/TPCN2/SLC22A1/TF/SLC39A11/SCN8A/SLC17A3/SHROOM2/SLC30A10/ATP7B/SLC28A2/SLC20A2/SCN11A/KCNK17/CLDN16/SLC13A2/KCNK5/GRIN2B/ABCB11/SLC12A6/TRPV4/KCNJ8/PKDREJ/SLC5A12/TRPM3/KCNE2/TMEM38A/CACNA1F/SLC6A20/SCN3B/SLC39A4/SLC12A4/KCNN4/P2RX4/ATP2C2/SLC4A11/SLC28A3/TRPC4/JPH1/FAM155B/KCNH4/SLC30A3/KCNK1/SLC6A9/TRPM2/SLC34…
liver	turquoise	MF	GO:0004745	retinol dehydrogenase activity	ADH6/ADH1B/ADH4/ADH1C/ADH1A/RDH5/ADH7/RDH12
liver	turquoise	MF	GO:0015238	drug transmembrane transporter activity	SLC38A3/SFXN5/ABCG2/SLC25A10/SFXN1/SLC22A1/SLC25A23/SLC25A42/SLC46A1/SLC25A1/SLC19A1/SLC16A12/ABCC2/SLC6A20/SLC4A11/SLC38A5/SLC6A9/SLC36A1/SLC6A8/SLC25A19/SLC7A1
liver	turquoise	MF	GO:0019200	carbohydrate kinase activity	PFKFB1/XYLB/GCK/GALK1/KHK/PFKFB4/HK2/PFKP
liver	turquoise	MF	GO:0005319	lipid transporter activity	GRAMD1C/SLC10A1/ABCA6/SLC22A9/TMEM30B/SLCO2B1/SLCO1B3/PCTP/TTPA/ABCA8/RBP4/ABCG8/SLCO1B7/APOM/ABCA10/SLCO1A2/ABCD3/APOA1/APOA5/ABCB11/APOA2/FABP1/GLTP/PITPNM1/TNFAIP8L3/PLSCR1/GRAMD1A
liver	turquoise	MF	GO:0043177	organic acid binding	ACOX2/GRHPR/ACOX1/OXER1/OTC/DPYS/PHYH/SERPINA5/HMGCL/GNMT/RIDA/HAPLN4/DBH/ACACB/SLC46A1/SESN3/HNF4A/DDAH1/LRAT/GRIN2B/SLC19A1/ASS1/FABP1/UGT1A7/GPR143/CYP27C1/SHMT2/FOLR3/TNFAIP6/HAPLN3/PPARD/PLOD3/PRR7/VDR/STX3/PLOD2/VCAN/NME2
liver	turquoise	MF	GO:0004879	nuclear receptor activity	AR/NR1I3/ESR1/NR1I2/RORC/THRB/ARNT/NR1D2/RXRG/PPARD/ESR2/VDR/NR1H2
liver	turquoise	MF	GO:0098531	transcription factor activity, direct ligand regulated sequence-specific DNA binding	AR/NR1I3/ESR1/NR1I2/RORC/THRB/ARNT/NR1D2/RXRG/PPARD/ESR2/VDR/NR1H2
liver	turquoise	MF	GO:0033293	monocarboxylic acid binding	ACOX2/ACOX1/OXER1/SERPINA5/RIDA/ACACB/HNF4A/LRAT/FABP1/UGT1A7/CYP27C1/PPARD/PRR7/VDR/STX3/NME2
liver	turquoise	MF	GO:0042910	xenobiotic transmembrane transporter activity	SLC47A1/ABCG2/SLC17A3/ABCC2/SLC47A2/SLC2A1

## Sheet: Small Intestine_GO
Table S3-2: GO enrichment of small intestine (group 2).
Tissue	Module	ONTOLOGY	ID	Description	GeneID
Small Intestine	turquoise	BP	GO:0007586	digestion	VDR/INAVA/GUCY2C/CAPN9/PLS1/PRSS3/PBLD/ABCG8/VIL1/F11R/SLC26A6/ABCG5/MOGAT2/MUC2/TFF3/CAPN8/KCNQ1/NEUROD1/MUC13/SLC2A2/FABP1/CRACD/FABP2/SI/GCNT3/GUCA2A/ALPI/SLC2A5/TFF1/SLC5A1/GUCA2B/MGAM/ARX/WNK4/SGK1/LCT/SCT/PNLIPRP2/APOA1/LIMA1/MUC4/SST/APOA4/TRPV1/SOAT2/PRSS2/TFF2/AKR1C2/SCARB1/NR1H3/COPA/LRCOL1/UCN/AQP5/PTGER1/WNK1
Small Intestine	turquoise	BP	GO:0006805	xenobiotic metabolic process	NAT2/ACY1/CES3/HNF4A/CES2/NR1I2/AKR7L/AKR7A3/SULT1B1/NAT1/CYP2S1/CYP2B6/CYP2J2/CYP2C19/CYP2C18/SULT1A2/CYP3A5/ACY3/UGT1A10/CYP2C9/AOC1/UGT1A1/DPEP1/SULT1A1/CMBL/GSTO2/GGT1/AADAC/GSTM4/UGT2B15/EPHX2/UGT1A8/GSTA2/GSTA1/CYP2D6/CYP3A4/CYP2W1/SULT1A3/AKR7A2/MGST1/NQO1/ALDH3A1/CYB5B/CYP2D7/LPO/FMO3/GSTM2/RORA/AOC2/CYP2U1/HSP90AB1
Small Intestine	turquoise	BP	GO:0006066	alcohol metabolic process	PLCB3/VDR/ITPKA/DGAT1/ADH6/NR1H4/PCK2/TKFC/SULT1B1/PLCH1/DEGS2/ACSS2/MOGAT3/AKR1C3/MOGAT2/RETSAT/SULT1A2/EBP/IMPA1/SGPP2/INPP5J/SULT1A1/AKR1B10/GK/CEBPA/HMGCR/PLB1/CYP27A1/SPHK2/CFTR/EPHX2/GBA2/GPD2/MSMO1/NR0B2/BCO1/CYP2D6/DHCR24/MINPP1/ADH1C/HMGCS1/PCK1/TPI1/APOB/PECR/SULT1E1/GPD1/SULT2A1/SULT2B1/TTC39B/CYP3A4/RDH13/NAAA/APOA1/DHCR7/LIMA1/APOA4/NAPEPLD/ELOVL6/DHDDS/AKR1C4/CHKA/SULT1A3/PCSK9/AKR7…
Small Intestine	turquoise	BP	GO:0008202	steroid metabolic process	NR5A2/PRLR/VDR/HSD17B2/NR1H4/DHRS11/ATP1A1/NR1I2/SLC27A2/SULT1B1/MALRD1/CYP2B6/CYP2C19/AKR1C3/SULT1A2/CYP3A5/CYP2C9/HSD11B2/UGT1A1/EBP/HSD17B11/SULT1A1/SHH/CEBPA/HMGCR/SGPL1/CYP27A1/UGT2B7/CFTR/ATP8B1/STARD4/UGT2B15/EPHX2/GBA2/UGT1A8/TFCP2L1/MSMO1/HSD3B2/NR0B2/CYP2D6/DHCR24/HSD3B1/HMGCS1/SRD5A1/APOB/SULT1E1/SULT2A1/SULT2B1/TTC39B/CYP3A4/OSBP/G6PC/APOA1/DHCR7/LIMA1/LIPA/APOA4/ELOVL6/AKR1C4/SULT1A3…
Small Intestine	turquoise	BP	GO:0006631	fatty acid metabolic process	PLA2G4F/PLA2G10/ACSL5/CES2/PCK2/FAAH/ELOVL7/SLC27A2/ADTRP/CRYL1/CYP2S1/CYP2B6/CYP2J2/CYP4F12/ACSS2/CYP2C19/CYP4F3/AKR1C3/CYP2C18/ACBD5/ACADS/CYP2C9/EDN2/CEACAM1/FADS6/DECR1/FA2H/FABP1/CPT2/PTGR1/PRXL2B/CBR1/SLC27A4/GGT1/CYP4F2/SGPL1/PRKAB1/MAPK3/LPIN3/GSTM4/EPHX2/UGT1A8/MSMO1/EIF6/GSTA1/CYP2D6/HADHA/APOC3/PCK1/MLXIPL/PECR/DECR2/AACS/ELOVL1/CYP3A4/ABHD3/NAAA/PPARG/APOA4/ELOVL6/GSTZ1/ACSF2/TECR/PLA…
Small Intestine	turquoise	BP	GO:0016042	lipid catabolic process	PLA2G4F/LIPH/SMPDL3B/PLCB3/PLA2G10/CES3/PLA2G12B/PCK2/SMPD3/FAAH/PDXDC1/SLC27A2/PLD1/PLCH1/ADTRP/GBA3/CYP4F12/PLAAT2/CYP4F3/AKR1C3/ACBD5/ACADS/DECR1/HSD17B11/FABP1/FABP2/CPT2/NEU4/AKR1B10/SLC27A4/IDH1/CYP4F2/SGPL1/PLB1/CYP27A1/AADAC/LPIN3/GBA2/CPS1/BCO1/HADHA/APOC3/PCK1/SRD5A1/APOB/PECR/DECR2/SULT1E1/FABP6/SULT2A1/CYP3A4/SCT/GALC/ABHD3/PNLIPRP2/NAAA/NAGA/APOA1/LIPA/APOA4/NAPEPLD/PLA2G4D/NUDT19/AC…
Small Intestine	turquoise	BP	GO:0044242	cellular lipid catabolic process	PLA2G4F/SMPDL3B/PCK2/SMPD3/FAAH/PDXDC1/SLC27A2/ADTRP/GBA3/CYP4F12/CYP4F3/AKR1C3/ACBD5/ACADS/DECR1/FABP1/FABP2/CPT2/NEU4/AKR1B10/SLC27A4/IDH1/CYP4F2/SGPL1/AADAC/LPIN3/GBA2/CPS1/BCO1/HADHA/APOC3/PCK1/APOB/PECR/DECR2/FABP6/GALC/ABHD3/PNLIPRP2/NAGA/APOA1/APOA4/NAPEPLD/PLA2G4D/NUDT19/ACAD10/LIPG/ACOT8/ALDH3A2/HSD17B4/PNPLA3/ACADVL/ACAT2/GBA/SCARB1/HACL1/ASAH2B/BDH2/GLA/PLA2G4E/GLYATL2/TWIST1/SPHK1/ABH…
Small Intestine	turquoise	BP	GO:0071466	cellular response to xenobiotic stimulus	NAT2/ACY1/CES3/HNF4A/CES2/PCK2/NR1I2/AKR7L/AKR7A3/SULT1B1/NAT1/CYP2S1/CYP2B6/CYP2J2/CYP2C19/CYP2C18/SULT1A2/CYP3A5/ACY3/UGT1A10/CYP2C9/AOC1/UGT1A1/DPEP1/SULT1A1/CMBL/GSTO2/GGT1/AADAC/GJB2/GSTM4/UGT2B15/EPHX2/UGT1A8/GSTA2/GSTA1/ABCC2/CYP2D6/PCK1/SRD5A1/CYP3A4/CYP2W1/SULT1A3/AKR7A2/MGST1/NQO1/ALDH3A1/CYB5B/CYP2D7/LPO/FMO3/GSTM2/CFLAR/TMEM38A/RORA/AOC2/FOXO1/NR3C1/CYP2U1/HSP90AB1/HSF1
Small Intestine	turquoise	BP	GO:0022600	digestive system process	VDR/INAVA/PLS1/PBLD/ABCG8/VIL1/F11R/SLC26A6/ABCG5/MOGAT2/MUC2/TFF3/KCNQ1/NEUROD1/MUC13/SLC2A2/FABP1/CRACD/FABP2/GCNT3/SLC2A5/TFF1/SLC5A1/WNK4/SGK1/SCT/APOA1/LIMA1/MUC4/APOA4/TRPV1/SOAT2/TFF2/SCARB1/NR1H3/COPA/UCN/AQP5/PTGER1/WNK1
Small Intestine	turquoise	BP	GO:0015711	organic anion transport	PLA2G4F/PRELID2/SLC37A4/TMEM30B/SLC35D2/SLC17A4/PLA2G10/SLC37A1/PLA2G12B/SLC6A7/NR1H4/SLC52A1/SLC27A2/ABCG8/SLC51A/SLC6A20/SLC44A4/SLC16A5/SLC51B/TNFRSF11A/SLC52A3/SLC26A6/SLC9A3R1/CA13/SLC36A1/SLC25A24/SLC35B1/P2RX4/SLC1A1/SLC25A13/SLC25A1/CEACAM1/SLC3A1/SLC25A10/SLC23A1/PRELID3B/ABCB1/SLC13A2/SLC2A2/FABP1/CPT2/MTTP/CA7/SLC27A4/SLC35A2/SLC17A8/ACE2/STARD10/CYP4F2/SLC26A3/SLC13A1/SLC10A2/ATP10B/C…
Small Intestine	turquoise	BP	GO:0033559	unsaturated fatty acid metabolic process	PLA2G4F/PLA2G10/CES2/FAAH/ELOVL7/CYP2S1/CYP2B6/CYP2J2/CYP4F12/CYP2C19/CYP4F3/AKR1C3/CYP2C18/CYP2C9/EDN2/PTGR1/PRXL2B/CBR1/CYP4F2/MAPK3/EPHX2/GSTA1/CYP2D6/DECR2/ELOVL1/ELOVL6/AKR1C4/ACOT8/HSD17B4/AKR1C2/CYP2D7/ALOX15B/HPGDS/GLYATL2/FADS2/GSTM2/PIBF1/PLA2G4C/ABCD2/FADS1/CYP2U1/SIRT1
Small Intestine	turquoise	BP	GO:0050892	intestinal absorption	VDR/PLS1/ABCG8/VIL1/F11R/SLC26A6/ABCG5/MOGAT2/KCNQ1/SLC2A2/FABP1/FABP2/GCNT3/SLC2A5/SLC5A1/APOA1/LIMA1/APOA4/SOAT2/SCARB1
Small Intestine	turquoise	BP	GO:0001676	long-chain fatty acid metabolic process	PLA2G10/ACSL5/FAAH/SLC27A2/ADTRP/CYP2S1/CYP2B6/CYP2J2/CYP4F12/CYP2C19/CYP4F3/AKR1C3/CYP2C18/CYP2C9/CBR1/SLC27A4/CYP4F2/MAPK3/GSTM4/EPHX2/GSTA1/CYP2D6/ELOVL1/CYP3A4/ELOVL6/ACOT8/HSD17B4/PNPLA3/ASAH2B/CYP2D7/ALOX15B/HPGDS/GLYATL2/FADS2/GSTM2/PLA2G4C/ACSL4/SLC27A3/FADS1/CYP2U1
Small Intestine	turquoise	BP	GO:0009410	response to xenobiotic stimulus	NAT2/ACY1/CES3/HNF4A/CES2/PCK2/NR1I2/AKR7L/AKR7A3/SULT1B1/NAT1/CYP2S1/CYP2B6/CYP2J2/CYP2C19/CYP2C18/SULT1A2/CYP3A5/ACY3/UGT1A10/CYP2C9/AOC1/UGT1A1/DPEP1/SULT1A1/CMBL/GSTO2/DNM2/GGT1/AADAC/GJB2/GSTM4/UGT2B15/EPHX2/CPS1/UGT1A8/GSTA2/GSTA1/ABCC2/CYP2D6/PCK1/PPP1R1B/SRD5A1/CYP3A4/PPARG/GSS/CYP2W1/SULT1A3/GCLC/AKR7A2/MGST1/NQO1/ALDH3A1/CDK5/CYB5B/GBA/F7/CYP2D7/LPO/FADD/NPFF/FMO3/GSTM2/TRDMT1/RANBP2/CF…
Small Intestine	turquoise	BP	GO:0006720	isoprenoid metabolic process	DGAT1/ADH6/CYP2S1/CYP2C19/AKR1C3/RETSAT/CYP2C18/CYP3A5/CYP2C9/UGT1A1/SDC1/PDSS1/AKR1B10/HMGCR/PLB1/UGT1A8/BCO1/RBP2/CYP2D6/ADH1C/APOC3/HMGCS1/SRD5A1/APOB/PECR/CYP3A4/RDH13/APOA1/APOM/APOA4/ABCA4/NAPEPLD/DHDDS/AKR1C4/HMGCS2/FDPS/ALDH3A2/MVK/IDI1/FDFT1/MVD/DPM1/SCPEP1/ALDH1A3/ADH1B/CYP27C1/RARRES2
Small Intestine	turquoise	BP	GO:0034308	primary alcohol metabolic process	DGAT1/ADH6/SULT1B1/ACSS2/AKR1C3/RETSAT/SULT1A2/SULT1A1/AKR1B10/PLB1/GPD2/BCO1/CYP2D6/ADH1C/PECR/SULT1E1/GPD1/SULT2A1/CYP3A4/RDH13/NAAA/NAPEPLD/AKR1C4/CHKA/SULT1A3/AKR7A2/ALDH3A2/ALDH3B1/AKR1C2/REST/ALDH1A3/ADH1B/CYP27C1
Small Intestine	turquoise	BP	GO:0034754	cellular hormone metabolic process	HSD17B2/DGAT1/ADH6/DHRS11/CYP2S1/AKR1C3/RETSAT/CYP2C18/CYP3A5/CYP2C9/UGT1A1/HSD17B11/SULT1A1/AKR1B10/SHH/SGPL1/PLB1/UGT2B7/UGT1A8/HSD3B2/BCO1/CYP2D6/HSD3B1/ADH1C/SRD5A1/SULT1E1/CYP3A4/RDH13/AKR1C4/HSD17B8/HSD17B4/AKR1C2/TSPO/SCARB1/FDXR/LHB/SCPEP1/REST/ALDH1A3/CYP21A2/ADH1B/ESR1/CYP27C1/TSPOAP1
Small Intestine	turquoise	BP	GO:0032530	regulation of microvillus organization	USH1C/RAP1GAP/PLS1/PLD1/KLF5/VIL1/CDHR2/CDHR5/ATP8B1/FSCN1
Small Intestine	turquoise	BP	GO:1901568	fatty acid derivative metabolic process	PLA2G4F/PLA2G10/DGAT1/ACSL5/CES2/FAAH/ELOVL7/GGT6/BDH1/CYP2S1/CYP2B6/CYP2J2/CYP4F12/CYP2C19/CYP4F3/AKR1C3/CYP2C18/CYP2C9/SLC25A1/EDN2/DPEP1/PTGR1/PRXL2B/CBR1/GGT1/CYP4F2/MAPK3/EPHX2/GSTA1/CYP2D6/FAR2/AACS/ELOVL1/ELOVL6/TECR/AKR1C4/HSD17B8/HMGCS2/HSD17B4/AKR1C2/CYP2D7/BDH2/ALOX15B/PLA2G3/HPGDS/PIBF1/PLA2G4C/ACSL4/FADS1/CYP2U1/SIRT1/PPT1
Small Intestine	turquoise	BP	GO:0005996	monosaccharide metabolic process	SLC37A4/FUT6/GALE/FUOM/PCK2/TKFC/HKDC1/CRYL1/FBP1/KHK/FUT2/PKLR/SLC25A13/TFF3/UGT1A10/SLC25A1/PFKFB4/GLYCTK/UGT1A1/SLC25A10/SLC23A1/UGT2A3/GALM/SELENOS/FUT4/GSTO2/C1QTNF12/SLC35A2/FAM3C/MST1/UGT2B7/PFKL/FOXA2/ALDOB/UGT2B15/GPD2/UGT1A8/DHDH/PCK1/TPI1/GPD1/HK2/G6PC/PGD/GCLC/GLB1/PMM2/UGT2B17/GCG/GDPGP1/GALK1/KCNJ11/PHLDA2/PGK1/SDS/FBP2/ENO1/POMC/B3GLCT/KAT2B/INPP5K/MAN2B2/HECTD4/RANBP2/WDTC1/FOXK1/…
Small Intestine	turquoise	BP	GO:0044282	small molecule catabolic process	FUT6/GALE/HGD/PCK2/FAAH/TKFC/TST/SLC27A2/ENTPD8/APOBEC1/SULT1B1/ADTRP/BDH1/CRYL1/URAD/GPT/CYP4F12/KHK/CYP4F3/AKR1C3/ACBD5/ACADS/SULT1A2/FUT2/PKLR/GLYCTK/DECR1/IMPA1/INPP5J/GALM/FABP1/FUT4/CPT2/SULT1A1/AKR1B10/SLC27A4/GK/CYP4F2/CYP27A1/HAAO/PFKL/ENTPD7/LPIN3/SLC9A1/ALDOB/MPST/SDSL/GPD2/OTC/DHDH/HADHA/PRODH/ENTPD6/PCK1/TPI1/PECR/DECR2/SULT1E1/HK2/SHMT1/SULT2A1/OAT/ABHD3/QPRT/MCCC2/GSTZ1/PNKD/NUDT19…
Small Intestine	turquoise	BP	GO:0006694	steroid biosynthetic process	PRLR/VDR/HSD17B2/NR1H4/DHRS11/ATP1A1/SLC27A2/MALRD1/AKR1C3/HSD11B2/EBP/HSD17B11/HMGCR/CYP27A1/CFTR/STARD4/TFCP2L1/MSMO1/HSD3B2/DHCR24/HSD3B1/HMGCS1/SRD5A1/APOB/CYP3A4/OSBP/APOA1/DHCR7/APOA4/ELOVL6/AKR1C4/HSD17B8/HMGCS2/FGFR4/FDPS/ACOT8/MVK/SQLE/HSD17B4/IDI1/HSD3B7/FDFT1/TSPO/OSBPL2/TM7SF2/ACAT2/MVD/SCARB1/FDXR/LHB/INSIG1/REST/CYP21A2/CYP7B1/SIRT1/MBTPS1/TSPOAP1/CNBP
Small Intestine	turquoise	BP	GO:0006790	sulfur compound metabolic process	SLC35D2/PAPSS2/DGAT1/ACSL5/B3GNT7/B3GNT3/ELOVL7/TST/SULT1B1/CNDP2/GSR/BPNT1/GGT6/CHST5/ACSS2/SULT1A2/SLC25A1/SLC25A10/DPEP1/SULT1A1/GSTO2/IDH1/ETHE1/GGT1/GSTM4/MPST/SLC35D1/CPS1/GSTA2/GSTA1/ABCC2/FAR2/UGDH/HMGCS1/SLC35B3/SULT1E1/SULT2A1/SULT2B1/ELOVL1/GCLM/SUCLG2/DBI/MCCC2/ELOVL6/GSTZ1/ACSF2/TECR/SLC26A1/GSS/SULT1A3/GCLC/GLB1/PAX8/ACPP/TPK1/HSD17B8/HMGCS2/ACOT8/MGST1/MVK/SLC19A3/HSD17B4/PDP2/SULT…
Small Intestine	turquoise	BP	GO:0006721	terpenoid metabolic process	DGAT1/ADH6/CYP2S1/CYP2C19/AKR1C3/RETSAT/CYP2C18/CYP3A5/CYP2C9/UGT1A1/SDC1/AKR1B10/PLB1/UGT1A8/BCO1/RBP2/CYP2D6/ADH1C/APOC3/HMGCS1/SRD5A1/APOB/PECR/CYP3A4/RDH13/APOA1/APOM/APOA4/ABCA4/NAPEPLD/AKR1C4/HMGCS2/FDPS/ALDH3A2/FDFT1/SCPEP1/ALDH1A3/ADH1B/CYP27C1/RARRES2
Small Intestine	turquoise	BP	GO:0042632	cholesterol homeostasis	NR5A2/PLA2G10/PLA2G12B/NR1H4/HNF4A/MALL/ABCG8/MALRD1/ABCG5/MTTP/EPHX2/APOC3/APOB/TTC39B/G6PC/APOA1/APOM/LIMA1/APOA4/PCSK9/LIPG/SOAT2/FGFR4/RALY/XBP1/SCARB1/NR1H3/INSIG1/RORA/CYP7B1/ABCA1/SIRT1/LCAT/HDAC9
Small Intestine	turquoise	BP	GO:0055092	sterol homeostasis	NR5A2/PLA2G10/PLA2G12B/NR1H4/HNF4A/MALL/ABCG8/MALRD1/ABCG5/MTTP/EPHX2/APOC3/APOB/TTC39B/G6PC/APOA1/APOM/LIMA1/APOA4/PCSK9/LIPG/SOAT2/FGFR4/RALY/XBP1/SCARB1/NR1H3/INSIG1/RORA/CYP7B1/ABCA1/SIRT1/LCAT/HDAC9
Small Intestine	turquoise	BP	GO:0046486	glycerolipid metabolic process	PLA2G4F/LIPH/CDS1/PLA2G10/DGAT1/PIP5K1B/NR1H4/PCK2/FAAH/SERINC2/APOBEC1/PLD1/SLC44A4/BPNT1/PLAAT2/MOGAT3/MOGAT2/PCYT2/SLC44A3/IMPA1/AGPAT2/INPP5J/FABP1/FABP2/PI4K2B/GK/STARD10/PLB1/ALPI/SELENOI/AADAC/PGAP3/MFSD2A/LPIN3/AGMO/CPS1/MBOAT7/HADHA/APOC3/PCK1/APOB/GPD1/MBOAT1/PGAP2/FABP6/ABHD3/DBI/PNLIPRP2/G6PC/APOA1/PCYT1A/LPCAT4/APOA4/NAPEPLD/PLA2G4D/CHKA/ETNK1/PCSK9/LIPG/PLBD1/PLA2G2A/PNPLA3/PIGN/PIG…
Small Intestine	turquoise	BP	GO:0072330	monocarboxylic acid biosynthetic process	PLA2G4F/NR1H4/ELOVL7/SLC27A2/HKDC1/MALRD1/FBP1/ACSS2/AKR1C3/PKLR/CYP2C9/PFKFB4/EDN2/CEACAM1/FADS6/FA2H/PRXL2B/CBR1/PRKAB1/CYP27A1/SEC13/PFKL/GSTM4/ALDOB/STARD4/EPHX2/SIRT6/EIF6/CYP2D6/APOC3/MLXIPL/TPI1/PECR/DECR2/GPD1/HK2/ELOVL1/CYP3A4/OSBP/ABHD3/APOA4/ELOVL6/TECR/AKR1C4/LIPG/HSD17B8/FGFR4/ACOT8/HSD17B4/HSD3B7/OSBPL2/ACADVL/GALK1/XBP1/NR1H3/ASAH2B/INSIG1/ALOX15B/PGK1/AGXT/SDS/ENO1/HPGDS/NUP58/FAD…
Small Intestine	turquoise	BP	GO:0055088	lipid homeostasis	NR5A2/PLA2G10/DGAT1/PLA2G12B/NR1H4/HNF4A/MALL/ABCG8/MALRD1/ABCG5/TM6SF2/MTTP/CEBPA/EPHX2/APOC3/MLXIPL/APOB/TTC39B/G6PC/APOA1/APOM/LIMA1/PPARG/APOA4/PCSK9/LIPG/SOAT2/FGFR4/ORMDL2/PNPLA3/RALY/XBP1/SCARB1/NR1H3/RCN3/INSIG1/NR1D2/RORA/THADA/CYP7B1/ZBTB20/ABCA1/SIRT1/LCAT/ABHD8/HDAC9
Small Intestine	turquoise	BP	GO:0042445	hormone metabolic process	VDR/FOXA1/HSD17B2/DGAT1/ADH6/DHRS11/ATP1A1/IYD/SULT1B1/SLC44A4/CYP2S1/AKR1C3/RETSAT/CYP2C18/CYP3A5/CYP2C9/HSD11B2/ENPEP/UGT1A1/HSD17B11/SULT1A1/AKR1B10/SHH/ACE2/SGPL1/PLB1/CYP27A1/UGT2B7/ACE/MME/UGT1A8/HSD3B2/BCO1/CYP2D6/HSD3B1/ADH1C/SRD5A1/SULT1E1/CYP3A4/RDH13/APOA1/DHCR7/AKR1C4/PAX8/HSD17B8/HSD17B4/AKR1C2/TSPO/PCSK1/SCARB1/FDXR/LHB/DIO2/FURIN/SCPEP1/REST/ALDH1A3/CYP21A2/ADH1B/COLQ/ESR1/MECP2/CY…
Small Intestine	turquoise	BP	GO:0046394	carboxylic acid biosynthetic process	PLA2G4F/ALDH18A1/NAGS/NR1H4/SMPD3/ELOVL7/SLC27A2/HKDC1/MALRD1/GGT6/SEPHS2/GPT/FBP1/ACSS2/AKR1C3/PKLR/CYP2C9/PFKFB4/EDN2/CEACAM1/FADS6/FA2H/PRXL2B/CBR1/GGT1/PRKAB1/CYP27A1/HAAO/ASL/SEC13/PFKL/GSTM4/ALDOB/STARD4/EPHX2/SLC35D1/CPS1/OTC/SIRT6/EIF6/CYP2D6/UGDH/APOC3/MLXIPL/TPI1/PECR/DECR2/GPD1/HK2/SHMT1/OAT/ELOVL1/CYP3A4/OSBP/ABHD3/APOA4/ELOVL6/TECR/AKR1C4/MTHFS/LIPG/HSD17B8/FGFR4/ACOT8/HSD17B4/HSD3B7…
Small Intestine	turquoise	BP	GO:0055081	anion homeostasis	DGAT1/NR1H4/HNF4A/SLC9A3R1/SLC12A8/CPS1/OTC/ABCC2/MLXIPL/SLC66A1/APOA1/SLC12A7/SLC12A2/LIPG/CA12/FGFR4/SLC34A3/XBP1/SLC7A11/RCN3/ABCA1/SIRT1/KCTD7
Small Intestine	turquoise	BP	GO:0050427	3'-phosphoadenosine 5'-phosphosulfate metabolic process	PAPSS2/SULT1B1/BPNT1/SULT1A2/SULT1A1/SLC35B3/SULT1E1/SULT2A1/SULT2B1/SLC26A1/SULT1A3/SULT1C2/SULT1A4
Small Intestine	turquoise	BP	GO:0016053	organic acid biosynthetic process	PLA2G4F/ALDH18A1/NAGS/NR1H4/SMPD3/ELOVL7/SLC27A2/HKDC1/MALRD1/GGT6/SEPHS2/GPT/FBP1/ACSS2/AKR1C3/PKLR/CYP2C9/PFKFB4/EDN2/CEACAM1/FADS6/FA2H/PRXL2B/CBR1/GGT1/PRKAB1/CYP27A1/HAAO/ASL/SEC13/PFKL/GSTM4/ALDOB/STARD4/EPHX2/SLC35D1/CPS1/OTC/SIRT6/EIF6/CYP2D6/UGDH/APOC3/MLXIPL/TPI1/PECR/DECR2/GPD1/HK2/SHMT1/OAT/ELOVL1/CYP3A4/OSBP/ABHD3/APOA4/ELOVL6/TECR/AKR1C4/MTHFS/LIPG/HSD17B8/FGFR4/ACOT8/HSD17B4/HSD3B7…
Small Intestine	turquoise	BP	GO:0015849	organic acid transport	PLA2G4F/SLC35D2/SLC17A4/PLA2G10/PLA2G12B/SLC6A7/NR1H4/SLC27A2/SLC51A/SLC6A20/SLC16A5/SLC51B/TNFRSF11A/SLC26A6/SLC9A3R1/SLC36A1/P2RX4/SLC1A1/SLC25A13/SLC25A1/CEACAM1/SLC3A1/SLC25A10/SLC23A1/SLC13A2/FABP1/CPT2/SLC27A4/SLC17A8/ACE2/STARD10/CYP4F2/SLC26A3/SLC13A1/SLC10A2/ACE/MFSD2A/ATP8B1/SLC6A19/SLC25A20/SLC5A12/SLC7A7/SLC7A9/SLC35D1/LCN12/ABCC2/SFXN5/SLC66A1/MAP2K6/PPARG/TRPV1/SLC26A1/SLC43A2/AKR1C…
Small Intestine	turquoise	BP	GO:0046942	carboxylic acid transport	PLA2G4F/SLC35D2/SLC17A4/PLA2G10/PLA2G12B/SLC6A7/NR1H4/SLC27A2/SLC51A/SLC6A20/SLC16A5/SLC51B/TNFRSF11A/SLC26A6/SLC9A3R1/SLC36A1/P2RX4/SLC1A1/SLC25A13/SLC25A1/CEACAM1/SLC3A1/SLC25A10/SLC23A1/SLC13A2/FABP1/CPT2/SLC27A4/SLC17A8/ACE2/STARD10/CYP4F2/SLC26A3/SLC13A1/SLC10A2/ACE/MFSD2A/ATP8B1/SLC6A19/SLC25A20/SLC5A12/SLC7A7/SLC7A9/SLC35D1/LCN12/ABCC2/SFXN5/SLC66A1/MAP2K6/PPARG/TRPV1/SLC26A1/SLC43A2/AKR1C…
Small Intestine	turquoise	BP	GO:0046470	phosphatidylcholine metabolic process	PLA2G4F/CDS1/PLA2G10/SLC44A4/PLAAT2/SLC44A3/STARD10/PLB1/MFSD2A/LPIN3/MBOAT1/ABHD3/DBI/APOA1/PCYT1A/LPCAT4/APOA4/PLA2G4D/CHKA/PLBD1/PLA2G2A/SCARB1/PLA2G4E/PLA2G3/PLA2G4C/MECP2/CSNK2A2/LCAT/GPLD1
Small Intestine	turquoise	BP	GO:0006814	sodium ion transport	PTPN3/SCNN1A/SLC17A4/ATP1A1/GLRX/PRSS8/SLC9A2/SLC9A3R1/KCNK1/P2RX4/TRPM4/SLC23A1/SLC13A2/SLC5A11/SLC9A3/SLC5A9/CNNM4/SLC17A8/DNM2/SLC13A1/SLC10A2/FXYD3/HCN3/SLC5A1/SLC9A1/SLC5A12/WNK4/SGK1/ATP1B1/PKP2/SLC28A3/SLC12A2/PCSK9/SLC10A7/SLC34A3/SLC3A2/SLC5A2/SCN4A/COMMD3/SLC5A3/HECW2/ATP1A4/SLC13A4/SLC38A2/SERPINE2/SLC9B1/HCN2/FXYD7/SCN8A/SLC38A1/KLHL3/SLC38A6/PRKCE/P2RX7/ADRB2/FXYD2/WNK1/SLC9A9/SLC9B2…
Small Intestine	turquoise	BP	GO:0034035	purine ribonucleoside bisphosphate metabolic process	PAPSS2/SULT1B1/BPNT1/SULT1A2/SULT1A1/SLC35B3/SULT1E1/SULT2A1/SULT2B1/SLC26A1/SULT1A3/SULT1C2/SULT1A4
Small Intestine	turquoise	BP	GO:0097164	ammonium ion metabolic process	PLA2G4F/CDS1/SMPDL3B/PLA2G10/SMPD3/CHDH/SLC44A4/DDC/DEGS2/PLAAT2/AKR1C3/AGMAT/SLC44A3/SGPP2/AKR1B10/STARD10/PLB1/SPHK2/MFSD2A/TPH1/LPIN3/SRD5A1/MBOAT1/SHMT1/ABHD3/DBI/APOA1/PCYT1A/LPCAT4/APOA4/PNKD/PLA2G4D/AKR1C4/CHKA/SULT1A3/AKR7A2/PLBD1/SPTLC2/AKR1C2/PLA2G2A/GBA/SCARB1/ASAH2B/PLA2G4E/PLA2G3/AMD1/SPHK1/SNCAIP/ATP7A/PLA2G4C/COLQ/MECP2/MOXD1/CSNK2A2/LCAT/PDE1B/GPLD1
Small Intestine	turquoise	BP	GO:1901264	carbohydrate derivative transport	SLC37A4/SLC35D2/SLC17A4/PLA2G10/SLC37A1/NLRP6/SLC25A24/GJB1/SLC35B1/SLC35C1/SLC35A2/SLC50A1/MFSD2A/SLC28A1/SLC35D1/SYTL2/SLC35B3/SLC28A2/G6PC/SLC28A3/AGR2/SLC10A7/SCARB1/SLC35A1/SLC29A3/SLC35E3/PRKCE
Small Intestine	turquoise	BP	GO:0015748	organophosphate ester transport	PRELID2/SLC37A4/TMEM30B/PLA2G10/SLC37A1/ABCG8/SLC44A4/SLC25A24/GJB1/PRELID3B/ABCB1/MTTP/STARD10/ATP10B/C2CD2L/MFSD2A/ATP8B1/CPTP/APOC3/SLC35B3/G6PC/APOA1/APOA4/ABCA4/PRELID1/OSBPL2/SCARB1/ATP10A/ABCA1/PLEKHA8P1/P2RX7/SLC25A32/ATP8B2/ATP11C
Small Intestine	turquoise	BP	GO:0016266	O-glycan processing	B3GNT8/GALNT5/B3GNT7/B3GNT3/B3GNT6/GALNT4/GALNT7/GALNT3/MUC3A/MUC2/GCNT1/MUC13/MUC17/GCNT3/GALNT1/MUC12/GALNT6/GALNT14/MUC20/MUC4/GALNT8/GALNT9/ST3GAL2
Small Intestine	turquoise	BP	GO:0009743	response to carbohydrate	HNF1B/NR1H4/HNF4A/PCK2/MAPK13/SLC26A6/KHK/PKLR/NEUROD1/TRPM4/RFX6/SRI/SELENOS/C1QTNF12/HMGCR/CASP3/SLC2A5/C2CD2L/CFTR/PFKL/FOXA2/NR0B2/PCK1/MLXIPL/APOB/AACS/NKX2-2/GCLM/ITGA2/MAP2K6/APOM/GCLC/GCG/ENDOG/ACVR1C/TXN2/XBP1/KCNJ11/CDK16/CTSV/PHPT1/SIDT2/CAT/RAB11B/GYS2/PPP3CA/RHOA/ZNF236/ZBTB20/SIN3A/PRKCE/KAT7/EIF2B4/EIF2B1/ERCC1/WDR35/PIK3CA/GPLD1/HMGN3/SLC9B2/RAB11FIP2/ZFP36L1
Small Intestine	turquoise	BP	GO:0006690	icosanoid metabolic process	PLA2G4F/PLA2G10/CES2/FAAH/GGT6/CYP2S1/CYP2B6/CYP2J2/CYP4F12/CYP2C19/CYP4F3/AKR1C3/CYP2C18/CYP2C9/EDN2/DPEP1/PTGR1/PRXL2B/CBR1/GGT1/CYP4F2/MAPK3/EPHX2/GSTA1/CYP2D6/AKR1C4/AKR1C2/CYP2D7/ALOX15B/PLA2G3/HPGDS/PIBF1/PLA2G4C/FADS1/CYP2U1/SIRT1
Small Intestine	turquoise	BP	GO:0046164	alcohol catabolic process	TKFC/SULT1B1/AKR1C3/SULT1A2/IMPA1/INPP5J/SULT1A1/AKR1B10/GK/CYP27A1/GPD2/TPI1/SULT1E1/SULT2A1/SULT1A3/HSD3B7/ALDH3B1/SCARB1/INPP5K/NUDT3/INPP5B
Small Intestine	turquoise	BP	GO:0098656	anion transmembrane transport	SLC37A4/SLC35D2/SLC37A1/SLC6A7/SLC6A20/SLC44A4/SLC26A6/SLC9A2/SLC36A1/SLC35B1/CLDN4/SLC1A1/CLIC5/SLC25A13/SLC25A1/SLC3A1/SLC25A10/SLC23A1/ABCB1/SLC9A3/CPT2/SLC35A2/SLC17A8/BEST4/SLC26A3/SLC13A1/FXYD3/CLCA1/CFTR/SLC6A19/SLC9A1/SLC25A20/SLC5A12/BEST2/SLC7A7/SLC7A9/SLC35D1/SLC12A8/VDAC1/SLC35B3/SLC66A1/CLCN3/SLC12A7/SLC26A1/SLC12A2/GABRE/ANKH/SLC43A2/CLCA4/CLCN1/SLC16A10/SLC3A2/SLC7A11/SLC6A14/SLC35…
Small Intestine	turquoise	BP	GO:0008206	bile acid metabolic process	NR5A2/NR1H4/SLC27A2/MALRD1/CYP27A1/ATP8B1/STARD4/GBA2/SULT2A1/OSBP/AKR1C4/FGFR4/ACOT8/HSD17B4/HSD3B7/OSBPL2/PANK2/CYP7B1/SIRT1
Small Intestine	turquoise	BP	GO:1901616	organic hydroxy compound catabolic process	TKFC/SULT1B1/CYP4F12/CYP4F3/AKR1C3/SULT1A2/IMPA1/INPP5J/SULT1A1/AKR1B10/GK/CYP4F2/CYP27A1/GPD2/TPI1/SULT1E1/SULT2A1/SULT1A3/HSD3B7/ALDH3B1/SCARB1/DIO2/INPP5K/NUDT3/MOXD1/INPP5B
Small Intestine	turquoise	BP	GO:0019369	arachidonic acid metabolic process	PLA2G10/FAAH/CYP2S1/CYP2B6/CYP2J2/CYP4F12/CYP2C19/AKR1C3/CYP2C18/CYP2C9/CBR1/CYP4F2/MAPK3/EPHX2/CYP2D6/CYP2D7/ALOX15B/HPGDS/PLA2G4C/CYP2U1
Small Intestine	turquoise	BP	GO:0000041	transition metal ion transport	SLC31A1/SLC39A5/SLC39A9/REP15/SLC39A11/ATP2C2/DNM2/ABCC2/SLC39A4/ATP7B/NECTIN1/SLC30A10/TCN2/ATP6V1B2/SLC39A7/SCO1/STEAP3/SLC40A1/ATP6AP1/ATP6V1A/TCN1/ATP6V0C/SLC25A37/ATP6V1C1/ATP6V0E1/RAB11B/CUTC/ATP6V1F/ATP7A/ATP6V1E2/ATP6V0E2/ATP6V1G2/SLC39A13/ISCU/SLC39A6
Small Intestine	turquoise	BP	GO:0015914	phospholipid transport	PRELID2/TMEM30B/PLA2G10/ABCG8/PRELID3B/ABCB1/MTTP/STARD10/ATP10B/C2CD2L/MFSD2A/ATP8B1/CPTP/APOC3/APOA1/APOA4/ABCA4/PRELID1/OSBPL2/SCARB1/ATP10A/ABCA1/PLEKHA8P1/P2RX7/ATP8B2/ATP11C
Small Intestine	turquoise	BP	GO:0019318	hexose metabolic process	SLC37A4/FUT6/GALE/FUOM/PCK2/TKFC/HKDC1/FBP1/KHK/FUT2/PKLR/SLC25A13/TFF3/SLC25A1/PFKFB4/GLYCTK/SLC25A10/GALM/SELENOS/FUT4/C1QTNF12/SLC35A2/FAM3C/MST1/PFKL/FOXA2/ALDOB/GPD2/PCK1/TPI1/GPD1/HK2/G6PC/GLB1/PMM2/GCG/GDPGP1/GALK1/KCNJ11/PHLDA2/PGK1/SDS/FBP2/ENO1/POMC/B3GLCT/KAT2B/INPP5K/MAN2B2/HECTD4/RANBP2/WDTC1/FOXK1/RORA/FOXO1/INPPL1/DUSP12/IGFBP3/SIRT1/AKT2/PIK3CA/GPLD1/HK1/PPP1R3F/ENO2
Small Intestine	turquoise	BP	GO:0034284	response to monosaccharide	HNF1B/NR1H4/HNF4A/PCK2/SLC26A6/KHK/PKLR/NEUROD1/TRPM4/RFX6/SRI/SELENOS/C1QTNF12/HMGCR/CASP3/SLC2A5/C2CD2L/CFTR/PFKL/FOXA2/NR0B2/PCK1/MLXIPL/AACS/NKX2-2/GCLM/ITGA2/APOM/GCLC/GCG/ENDOG/ACVR1C/TXN2/XBP1/KCNJ11/CDK16/CTSV/PHPT1/SIDT2/CAT/RAB11B/GYS2/PPP3CA/RHOA/ZNF236/ZBTB20/SIN3A/PRKCE/EIF2B4/EIF2B1/WDR35/PIK3CA/GPLD1/HMGN3/SLC9B2/RAB11FIP2
Small Intestine	turquoise	BP	GO:1990823	response to leukemia inhibitory factor	NR5A2/PLA2G10/BSPRY/KLF5/PADI2/SSTR1/ILDR1/PAX6/HK2/SHMT1/GCLM/XBP1/MAT2A/ADAM23/CACYBP/SOCS3/TEX14/PARP16/RIF1/RNMT/PCOLCE/SRSF3/TLE4/SIRT1/EIF4A2/ARID5B/PML/PTP4A3/WDR35/RARG/SYNGR1
Small Intestine	turquoise	BP	GO:1990830	cellular response to leukemia inhibitory factor	NR5A2/PLA2G10/BSPRY/KLF5/PADI2/SSTR1/ILDR1/PAX6/HK2/SHMT1/GCLM/XBP1/MAT2A/ADAM23/CACYBP/SOCS3/TEX14/PARP16/RIF1/RNMT/PCOLCE/SRSF3/TLE4/SIRT1/EIF4A2/ARID5B/PML/PTP4A3/WDR35/RARG/SYNGR1
Small Intestine	turquoise	BP	GO:0006641	triglyceride metabolic process	DGAT1/PCK2/APOBEC1/MOGAT3/MOGAT2/FABP1/FABP2/GK/AADAC/LPIN3/AGMO/CPS1/APOC3/PCK1/APOB/FABP6/PNLIPRP2/G6PC/APOA1/APOA4/PCSK9/LIPG/PNPLA3/SCARB1/NR1H3/CAT/INSIG1/PANK2/GPAT2/ACSL4/C3/SIRT1/GPLD1
Small Intestine	turquoise	BP	GO:0033865	nucleoside bisphosphate metabolic process	PAPSS2/DGAT1/ACSL5/ELOVL7/SULT1B1/BPNT1/ACSS2/SULT1A2/SLC25A1/SULT1A1/PANK1/HMGCR/FAR2/HMGCS1/SLC35B3/SULT1E1/SULT2A1/SULT2B1/ELOVL1/SUCLG2/DBI/MCCC2/ELOVL6/GSTZ1/ACSF2/TECR/SLC26A1/SULT1A3/HSD17B8/HMGCS2/ACOT8/MVK/HSD17B4/PDP2/SULT1C2/SULT1A4/MVD/PANK2/ACSL4/DCAKD/PPT1
Small Intestine	turquoise	BP	GO:0033875	ribonucleoside bisphosphate metabolic process	PAPSS2/DGAT1/ACSL5/ELOVL7/SULT1B1/BPNT1/ACSS2/SULT1A2/SLC25A1/SULT1A1/PANK1/HMGCR/FAR2/HMGCS1/SLC35B3/SULT1E1/SULT2A1/SULT2B1/ELOVL1/SUCLG2/DBI/MCCC2/ELOVL6/GSTZ1/ACSF2/TECR/SLC26A1/SULT1A3/HSD17B8/HMGCS2/ACOT8/MVK/HSD17B4/PDP2/SULT1C2/SULT1A4/MVD/PANK2/ACSL4/DCAKD/PPT1
Small Intestine	turquoise	BP	GO:0034032	purine nucleoside bisphosphate metabolic process	PAPSS2/DGAT1/ACSL5/ELOVL7/SULT1B1/BPNT1/ACSS2/SULT1A2/SLC25A1/SULT1A1/PANK1/HMGCR/FAR2/HMGCS1/SLC35B3/SULT1E1/SULT2A1/SULT2B1/ELOVL1/SUCLG2/DBI/MCCC2/ELOVL6/GSTZ1/ACSF2/TECR/SLC26A1/SULT1A3/HSD17B8/HMGCS2/ACOT8/MVK/HSD17B4/PDP2/SULT1C2/SULT1A4/MVD/PANK2/ACSL4/DCAKD/PPT1
Small Intestine	turquoise	BP	GO:0032528	microvillus organization	USH1C/RAP1GAP/PLS1/PLD1/KLF5/VIL1/SLC9A3R1/MYO1A/CDHR2/CDHR5/ATP8B1/FSCN1
Small Intestine	turquoise	BP	GO:0042738	exogenous drug catabolic process	NR1I2/CYP2S1/CYP2B6/CYP2J2/CYP2C19/CYP2C18/CYP2C9/CYP2D6/CYP3A4/CYP2W1/CYP2D7/CYP2U1
Small Intestine	turquoise	BP	GO:0034310	primary alcohol catabolic process	SULT1B1/AKR1C3/SULT1A2/SULT1A1/AKR1B10/SULT1E1/SULT2A1/SULT1A3/ALDH3B1
Small Intestine	turquoise	BP	GO:1903350	response to dopamine	DNM2/HCN3/MAPK3/FCSK/SULT1A3/GABPA/SIN3A/MAPK1/LRRK2
Small Intestine	turquoise	BP	GO:1903358	regulation of Golgi organization	CAMSAP3/DNM2/MAPK3/STX18/MAP2K2/AKAP9/MAP2K1/RAB33B/MAPK1
Small Intestine	turquoise	BP	GO:0006067	ethanol metabolic process	ADH6/SULT1B1/ACSS2/SULT1A2/SULT1A1/ADH1C/SULT1E1/SULT2A1/SULT1A3/ALDH3B1/ADH1B
Small Intestine	turquoise	BP	GO:0090280	positive regulation of calcium ion import	LGALS3/CASK/ATP2C2/SPHK2/GCG/ATP2A1/UCN/RAMP3/CCL2/PDGFRB/CXCL12
Small Intestine	turquoise	BP	GO:0016101	diterpenoid metabolic process	DGAT1/ADH6/CYP2S1/AKR1C3/RETSAT/CYP2C18/CYP3A5/UGT1A1/SDC1/AKR1B10/PLB1/UGT1A8/BCO1/RBP2/CYP2D6/ADH1C/APOC3/SRD5A1/APOB/PECR/CYP3A4/RDH13/APOA1/APOM/APOA4/ABCA4/NAPEPLD/AKR1C4/ALDH3A2/SCPEP1/ALDH1A3/ADH1B/CYP27C1/RARRES2
Small Intestine	turquoise	BP	GO:0009312	oligosaccharide biosynthetic process	B3GALT5/FUT3/FBP1/ST6GALNAC1/MPDU1/MGAT2/FBP2/ST3GAL2/B3GALNT1/ST6GALNAC6
Small Intestine	turquoise	BP	GO:0030149	sphingolipid catabolic process	SMPDL3B/SMPD3/PDXDC1/GBA3/NEU4/SGPL1/GBA2/GALC/NAGA/GBA/ASAH2B/GLA/SPHK1/PPT1
Small Intestine	turquoise	BP	GO:0008203	cholesterol metabolic process	NR1H4/EBP/CEBPA/HMGCR/CYP27A1/CFTR/EPHX2/GBA2/MSMO1/NR0B2/DHCR24/HMGCS1/APOB/SULT2B1/TTC39B/APOA1/DHCR7/LIMA1/APOA4/ELOVL6/PCSK9/SOAT2/HMGCS2/FDPS/MVK/SQLE/IDI1/HSD3B7/FDFT1/ACADVL/TM7SF2/ACAT2/MVD/GBA/SCARB1/FDXR/CAT/INSIG1/CYP7B1/ABCA1/LCAT/MBTPS1/CNBP
Small Intestine	turquoise	BP	GO:1902652	secondary alcohol metabolic process	NR1H4/EBP/CEBPA/HMGCR/CYP27A1/CFTR/EPHX2/GBA2/MSMO1/NR0B2/DHCR24/HMGCS1/APOB/SULT2B1/TTC39B/CYP3A4/APOA1/DHCR7/LIMA1/APOA4/ELOVL6/PCSK9/SOAT2/HMGCS2/FDPS/MVK/SQLE/IDI1/HSD3B7/FDFT1/ACADVL/TM7SF2/ACAT2/MVD/GBA/SCARB1/FDXR/CAT/INSIG1/CYP7B1/ABCA1/LCAT/MBTPS1/CNBP
Small Intestine	turquoise	BP	GO:0008209	androgen metabolic process	HSD17B11/SHH/SGPL1/UGT2B7/HSD3B2/HSD3B1/SRD5A1/CYP3A4/AKR1C4/HSD17B8/HSD17B4/SCARB1/ESR1
Small Intestine	turquoise	BP	GO:0034377	plasma lipoprotein particle assembly	DGAT1/MTTP/PLAGL2/P4HB/APOC3/APOB/APOA1/APOM/APOA4/SOAT2/ABCA1/LCAT/PRKACB
Small Intestine	turquoise	BP	GO:0046466	membrane lipid catabolic process	SMPDL3B/SMPD3/PDXDC1/GBA3/NEU4/SGPL1/GBA2/GALC/PNLIPRP2/NAGA/GBA/ASAH2B/GLA/SPHK1/PPT1
Small Intestine	turquoise	BP	GO:0030641	regulation of cellular pH	SLC26A6/SLC9A2/SLC9A3/CA7/SLC26A3/CFTR/MAPK3/RAB20/SLC9A1/CLCN3/ATP6V1B2/GPR89A/TM9SF4/NOX1/ATP6AP1/ATP6V1A/ATP6V0C/ATP1A4/ATP6V1C1/ATP6V0E1/ATP6V1F/SLC9B1/ATP6V1E2/MAPK1/PPT1/ATP6V0E2/ATP6V1G2/SLC9A9/LRRK2
Small Intestine	turquoise	BP	GO:0009746	response to hexose	HNF1B/NR1H4/HNF4A/PCK2/SLC26A6/KHK/PKLR/NEUROD1/TRPM4/RFX6/SRI/SELENOS/C1QTNF12/HMGCR/CASP3/SLC2A5/C2CD2L/CFTR/PFKL/FOXA2/NR0B2/PCK1/MLXIPL/AACS/NKX2-2/GCLM/APOM/GCLC/GCG/ENDOG/ACVR1C/TXN2/XBP1/KCNJ11/CDK16/CTSV/PHPT1/SIDT2/RAB11B/GYS2/PPP3CA/RHOA/ZNF236/ZBTB20/SIN3A/PRKCE/EIF2B4/EIF2B1/WDR35/PIK3CA/GPLD1/HMGN3/SLC9B2/RAB11FIP2
Small Intestine	turquoise	BP	GO:0034378	chylomicron assembly	MTTP/PLAGL2/P4HB/APOC3/APOB/APOA1/APOA4
Small Intestine	turquoise	BP	GO:0006643	membrane lipid metabolic process	SMPDL3B/FUT6/SMPD3/ELOVL7/SERINC2/PDXDC1/PLPP2/DEGS2/GBA3/FUT3/SGPP2/FA2H/NEU4/SGPL1/SPHK2/PGAP3/CPTP/AGMO/GBA2/CERS6/PGAP2/ELOVL1/GALC/PNLIPRP2/NAGA/CTSA/ELOVL6/TECR/GLB1/ORMDL2/ALDH3A2/SPTLC2/ALDH3B1/GBA/PIGN/PIGF/B3GALT4/ASAH2B/GPAA1/GLA/PIGV/CERS3/DPM1/SPHK1/CCN1/ST3GAL2/P2RX7/PPT1/B3GALNT1/GPLD1/HACD4/ST8SIA1/CERS5/ST6GALNAC6/ESYT1
Small Intestine	turquoise	BP	GO:0070085	glycosylation	DOLPP1/FUT6/MGAT4B/B3GNT8/GALNT5/FUOM/B3GNT7/B3GNT3/B3GNT6/B3GALT5/GALNT4/GALNT7/SLC51B/GALNT3/FUT3/MUC3A/ABO/MUC2/FUT2/GCNT1/MUC13/MUC17/FUT4/SLC35C1/ST6GALNAC1/GCNT3/GFPT1/MPDU1/MGAT3/GALNT1/GBA2/NUDT14/MUC12/GALNT6/GALNT14/MUC20/MUC4/COG3/GALNT8/DHDDS/PMM2/TMTC4/PGM3/MGAT2/MAN1A1/MVD/GBA/ALG1/B3GALT4/EDEM3/PIGV/ALG2/B3GLCT/FKTN/OST4/DPM1/GALNT9/RXYLT1/ST3GAL2/MGAT5B/FKRP/FUT11/MAN1C1/B3GALNT1/…
Small Intestine	turquoise	BP	GO:0001678	cellular glucose homeostasis	NR1H4/PCK2/HKDC1/FOXA3/NEUROD1/TRPM4/RFX6/SRI/C1QTNF12/HMGCR/C2CD2L/CFTR/FOXA2/PCK1/MLXIPL/HK2/AACS/GCLM/GCLC/GCG/ENDOG/XBP1/PIK3R2/KCNJ11/CDK16/PHPT1/SIDT2/RAB11B/FOXK1/PPP3CA/ZNF236/FOXO1/ZBTB20/SIN3A/PRKCE/SIRT1/WDR35/PIK3CA/GPLD1/HMGN3/HK1/SLC9B2/RAB11FIP2
Small Intestine	turquoise	BP	GO:0009062	fatty acid catabolic process	PCK2/FAAH/SLC27A2/ADTRP/CYP4F12/CYP4F3/ACBD5/ACADS/DECR1/FABP1/CPT2/SLC27A4/CYP4F2/LPIN3/HADHA/PCK1/PECR/DECR2/ABHD3/NUDT19/ACAD10/ACOT8/ALDH3A2/HSD17B4/ACADVL/ACAT2/HACL1/BDH2/GLYATL2/TWIST1/ABHD1/ABCD2/AKT2
Small Intestine	turquoise	BP	GO:0030004	cellular monovalent inorganic cation homeostasis	ATP1A1/SLC26A6/SLC9A2/SLC9A3/CA7/SLC26A3/CFTR/MAPK3/RAB20/SLC9A1/ATP1B1/CLCN3/ATP6V1B2/GPR89A/TM9SF4/NOX1/ATP6AP1/ATP6V1A/ATP6V0C/ATP1A4/ATP6V1C1/ATP6V0E1/ATP6V1F/SLC9B1/ATP6V1E2/MAPK1/PPT1/KCTD7/ATP6V0E2/ATP6V1G2/C7/SLC9A9/LRRK2
Small Intestine	turquoise	BP	GO:0042593	glucose homeostasis	HNF1A/FOXA1/FAM3B/NR1H4/HNF4A/PCK2/HKDC1/FOXA3/MCU/NEUROD1/TRPM4/RFX6/SRI/C1QTNF12/CEBPA/HMGCR/C2CD2L/CFTR/FOXA2/SIRT6/PAX6/PCK1/MLXIPL/HK2/AACS/GCLM/G6PC/PPARG/GCLC/GCG/FGFR4/ENDOG/FFAR2/XBP1/PIK3R2/KCNJ11/CDK16/PHPT1/SIDT2/SUCNR1/ASPSCR1/POMC/INPP5K/HECTD4/RAB11B/NCOA5/FOXK1/PPP3CA/ZNF236/FOXO1/ZBTB20/SIN3A/PRKCE/SIRT1/PRCP/WDR35/PIK3CA/GPLD1/HMGN3/HK1/SLC9B2/RAB11FIP2
Small Intestine	turquoise	BP	GO:0008210	estrogen metabolic process	HSD17B2/DHRS11/CYP3A5/CYP2C9/UGT1A1/HSD17B11/SULT1A1/SGPL1/CYP2D6/HSD3B1/SULT1E1/CYP3A4/HSD17B8/HSD17B4
Small Intestine	turquoise	BP	GO:0072348	sulfur compound transport	SLC44A4/SLC26A6/SLC9A3R1/SLC1A1/SLC3A1/SLC25A10/SLC26A3/SLC13A1/SLC7A9/SLC35B3/SLC26A1/SLC19A3/SLC7A11/SLC25A14/SLC13A4/SLC25A30/SLC26A4
Small Intestine	turquoise	BP	GO:1903825	organic acid transmembrane transport	SLC35D2/SLC6A7/SLC6A20/SLC36A1/SLC1A1/SLC25A13/SLC25A1/SLC3A1/SLC25A10/SLC23A1/CPT2/SLC17A8/SLC13A1/SLC6A19/SLC25A20/SLC5A12/SLC7A7/SLC7A9/SLC35D1/SLC66A1/SLC43A2/SLC16A10/SLC3A2/SLC7A11/SLC6A14/SLC16A3/SLC25A14/SLC13A4/SLC38A2/SLC1A2/SLC25A29/SLC16A7/SLC25A30/ARL6IP5/SLC38A1/SLC38A6/SLC36A4/AKT2/SLC25A32
Small Intestine	turquoise	BP	GO:1905039	carboxylic acid transmembrane transport	SLC35D2/SLC6A7/SLC6A20/SLC36A1/SLC1A1/SLC25A13/SLC25A1/SLC3A1/SLC25A10/SLC23A1/CPT2/SLC17A8/SLC13A1/SLC6A19/SLC25A20/SLC5A12/SLC7A7/SLC7A9/SLC35D1/SLC66A1/SLC43A2/SLC16A10/SLC3A2/SLC7A11/SLC6A14/SLC16A3/SLC25A14/SLC13A4/SLC38A2/SLC1A2/SLC25A29/SLC16A7/SLC25A30/ARL6IP5/SLC38A1/SLC38A6/SLC36A4/AKT2/SLC25A32
Small Intestine	turquoise	BP	GO:0019627	urea metabolic process	NAGS/NR1H4/CYP2C9/CEBPA/ASL/CPS1/OTC/NMRAL1
Small Intestine	turquoise	BP	GO:0033500	carbohydrate homeostasis	HNF1A/FOXA1/FAM3B/NR1H4/HNF4A/PCK2/HKDC1/FOXA3/MCU/NEUROD1/TRPM4/RFX6/SRI/C1QTNF12/CEBPA/HMGCR/C2CD2L/CFTR/FOXA2/SIRT6/PAX6/PCK1/MLXIPL/HK2/AACS/GCLM/G6PC/PPARG/GCLC/GCG/FGFR4/ENDOG/FFAR2/XBP1/PIK3R2/KCNJ11/CDK16/PHPT1/SIDT2/SUCNR1/ASPSCR1/POMC/INPP5K/HECTD4/RAB11B/NCOA5/FOXK1/PPP3CA/ZNF236/FOXO1/ZBTB20/SIN3A/PRKCE/SIRT1/PRCP/WDR35/PIK3CA/GPLD1/HMGN3/HK1/SLC9B2/RAB11FIP2
Small Intestine	turquoise	BP	GO:2000058	regulation of ubiquitin-dependent protein catabolic process	SH3RF2/SHH/CEBPA/GCLC/RNF19B/DDA1/GBA/DDRGK1/CSNK1D/TRIB1/ANKIB1/SUFU/TLK2/SOCS4/LATS1/DNAJB2/FAM122A/UBQLN4/SENP1/WAC/RNF144B/BAG5/RNF144A/RNF139/DISC1/GLMN/SUMO2/STYX/CSNK1E/UBQLN2/HSP90AB1/CSNK2A2/SOCS5/MAGEF1/PML/ARIH2/IL33/RAD23A/CLU/LRRK2/PRICKLE1/RPL5
Small Intestine	turquoise	BP	GO:0006493	protein O-linked glycosylation	B3GNT8/GALNT5/B3GNT7/B3GNT3/B3GNT6/GALNT4/GALNT7/GALNT3/MUC3A/MUC2/GCNT1/MUC13/MUC17/SLC35C1/GCNT3/GALNT1/MUC12/GALNT6/GALNT14/MUC20/MUC4/GALNT8/TMTC4/PGM3/B3GLCT/FKTN/DPM1/GALNT9/RXYLT1/ST3GAL2/MGAT5B/FKRP/VEGFB
Small Intestine	turquoise	BP	GO:0051923	sulfation	SULT1B1/CHST5/SULT1A2/SULT1A1/SULT1E1/SULT2A1/SULT1A3/SULT1C2/CHSY1
Small Intestine	turquoise	BP	GO:0070293	renal absorption	HNF1A/SLC9A3R1/AKR1C3/CLDN4/KCNQ1/AQP3/WNK4/SGK1/KLHL3
Small Intestine	turquoise	BP	GO:1902358	sulfate transmembrane transport	SLC26A6/SLC25A10/SLC26A3/SLC13A1/SLC26A1/SLC25A14/SLC13A4/SLC25A30/SLC26A4
Small Intestine	turquoise	BP	GO:0006665	sphingolipid metabolic process	SMPDL3B/FUT6/SMPD3/ELOVL7/SERINC2/PDXDC1/PLPP2/DEGS2/GBA3/FUT3/SGPP2/FA2H/NEU4/SGPL1/SPHK2/CPTP/GBA2/CERS6/ELOVL1/GALC/NAGA/CTSA/ELOVL6/TECR/GLB1/ORMDL2/ALDH3A2/SPTLC2/ALDH3B1/GBA/B3GALT4/ASAH2B/GLA/CERS3/SPHK1/CCN1/P2RX7/PPT1/B3GALNT1/HACD4/ST8SIA1/CERS5/ST6GALNAC6/ESYT1
Small Intestine	turquoise	BP	GO:0072329	monocarboxylic acid catabolic process	PCK2/FAAH/SLC27A2/ADTRP/CRYL1/CYP4F12/CYP4F3/ACBD5/ACADS/DECR1/FABP1/CPT2/SLC27A4/CYP4F2/LPIN3/HADHA/PCK1/PECR/DECR2/SULT2A1/ABHD3/NUDT19/PGD/ACAD10/ACOT8/ALDH3A2/IDNK/HSD17B4/ACADVL/ACAT2/HACL1/BDH2/AGXT/GLYATL2/TWIST1/ABHD1/ABCD2/AKT2
Small Intestine	turquoise	BP	GO:0098739	import across plasma membrane	KCNJ3/ATP1A1/SLC9A2/SLC31A1/SLC39A5/SLC1A1/TRPM4/SLC9A3/KCNK5/SLC2A5/SLC9A1/SLC12A8/KCNJ13/SLC39A4/ATP1B1/KCNJ4/SLC12A7/TRPV1/SLC12A2/SLC3A2/SLC7A11/KCNJ11/TRPV6/ATP1A4/RAMP3/SLC1A2/HCN2/ARL6IP5/SLC36A4/FXYD2/ISCU/SLC9A9/SLC39A6
Small Intestine	turquoise	BP	GO:0044272	sulfur compound biosynthetic process	SLC35D2/PAPSS2/ACSL5/B3GNT7/B3GNT3/ELOVL7/CNDP2/GGT6/CHST5/ACSS2/SLC25A1/GSTO2/GGT1/GSTM4/MPST/SLC35D1/GSTA2/GSTA1/UGDH/SLC35B3/ELOVL1/GCLM/ELOVL6/GSTZ1/TECR/SLC26A1/GSS/GCLC/TPK1/HSD17B8/MGST1/PDP2/CHST13/SLC7A11/HPGDS/MTRR/MAT2A/GSTM2/AMD1/ST3GAL2/BGN/ACSL4/CSGALNACT1/CHSY1/MTR/MTAP/PPT1/CHST12/CHST14/METTL16/CSGALNACT2
Small Intestine	turquoise	BP	GO:0009749	response to glucose	HNF1B/NR1H4/HNF4A/PCK2/KHK/PKLR/NEUROD1/TRPM4/RFX6/SRI/SELENOS/C1QTNF12/HMGCR/CASP3/C2CD2L/CFTR/PFKL/FOXA2/NR0B2/PCK1/MLXIPL/AACS/NKX2-2/GCLM/APOM/GCLC/GCG/ENDOG/ACVR1C/TXN2/XBP1/KCNJ11/CDK16/CTSV/PHPT1/SIDT2/RAB11B/GYS2/PPP3CA/RHOA/ZNF236/ZBTB20/SIN3A/PRKCE/EIF2B4/EIF2B1/WDR35/PIK3CA/GPLD1/HMGN3/SLC9B2/RAB11FIP2
Small Intestine	turquoise	BP	GO:0009311	oligosaccharide metabolic process	B3GALT5/GBA3/FUT3/FBP1/ST6GALNAC1/NEU4/TREH/MGAM/MPDU1/NAGA/MGAT2/GLA/FBP2/MAN2B2/ST3GAL2/BRAF/B3GALNT1/ST6GALNAC6
Small Intestine	turquoise	BP	GO:0008654	phospholipid biosynthetic process	DOLPP1/LIPH/CDS1/PLA2G10/PIP5K1B/NR1H4/PLD1/SLC44A4/PCYT2/SLC44A3/IMPA1/AGPAT2/INPP5J/PI4K2B/IDH1/STARD10/ALPI/SPHK2/SELENOI/PGAP3/MFSD2A/LPIN3/MBOAT7/HMGCS1/GPD1/MBOAT1/PGAP2/ABHD3/APOA1/PCYT1A/LPCAT4/PLA2G4D/DHDDS/CHKA/ETNK1/HMGCS2/FDPS/MVK/IDI1/SPTLC2/PLA2G2A/PNPLA3/MVD/PIGN/PIGF/PIK3R2/GPAA1/PIGV/PLD2/GPAT2/DPM1/INPP5K/PI4KB/RUFY1/PI4KA/INPPL1/FIG4/FADS1/MTMR9/CSNK2A2/LCAT/PIK3CA/INPP5F/INPP4…
Small Intestine	turquoise	BP	GO:0009226	nucleotide-sugar biosynthetic process	GMDS/GFPT1/FCSK/SLC35D1/UGDH/NANS/TSTA3/PMM2/PGM3/RENBP/UXS1
Small Intestine	turquoise	BP	GO:0006885	regulation of pH	SLC26A6/SLC9A2/SLC9A3/CA7/SLC26A3/CFTR/MAPK3/RAB20/SLC9A1/CLCN3/ATP6V1B2/GPR89A/TM9SF4/NOX1/ATP6AP1/ATP6V1A/ATP6V0C/ATP1A4/ATP6V1C1/ATP6V0E1/ATP6V1F/SLC9B1/SLC26A4/ATP6V1E2/MAPK1/PPT1/ATP6V0E2/ATP6V1G2/SLC9A9/LRRK2
Small Intestine	turquoise	BP	GO:0045017	glycerolipid biosynthetic process	LIPH/CDS1/PLA2G10/DGAT1/PIP5K1B/NR1H4/PCK2/PLD1/SLC44A4/MOGAT3/MOGAT2/PCYT2/SLC44A3/IMPA1/AGPAT2/INPP5J/PI4K2B/GK/STARD10/ALPI/SELENOI/PGAP3/MFSD2A/LPIN3/AGMO/PCK1/GPD1/PGAP2/ABHD3/APOA1/PCYT1A/LPCAT4/PLA2G4D/CHKA/ETNK1/PLA2G2A/PNPLA3/PIGN/PIGF/PIK3R2/SCARB1/NR1H3/GPAA1/PIGV/PLD2/GPAT2/DPM1/INPP5K/PI4KB/RUFY1/PI4KA/ACSL4/INPPL1/FIG4/C3/MTMR9/CSNK2A2/LCAT/PIK3CA/GPLD1/INPP5F/INPP4A/PIP4K2B
Small Intestine	turquoise	BP	GO:0016125	sterol metabolic process	NR1H4/EBP/CEBPA/HMGCR/CYP27A1/CFTR/EPHX2/GBA2/MSMO1/NR0B2/DHCR24/HMGCS1/APOB/SULT2B1/TTC39B/APOA1/DHCR7/LIMA1/LIPA/APOA4/ELOVL6/PCSK9/SOAT2/HMGCS2/FDPS/MVK/SQLE/IDI1/HSD3B7/FDFT1/ACADVL/TM7SF2/ACAT2/MVD/GBA/SCARB1/FDXR/CAT/INSIG1/CYP21A2/CYP7B1/ABCA1/LCAT/MBTPS1/CNBP
Small Intestine	turquoise	BP	GO:0006644	phospholipid metabolic process	PLA2G4F/DOLPP1/LIPH/CDS1/SMPDL3B/PLA2G10/PIP5K1B/PLA2G12B/FGFR3/NR1H4/SMPD3/SERINC2/PLD1/PLPP2/SLC44A4/BPNT1/GATA6/PLAAT2/PCYT2/SLC44A3/IMPA1/AGPAT2/INPP5J/PI4K2B/IDH1/STARD10/PLB1/ALPI/SPHK2/SELENOI/PGAP3/MFSD2A/LPIN3/MBOAT7/HADHA/HMGCS1/GPD1/MBOAT1/PGAP2/ABHD3/DBI/PNLIPRP2/APOA1/PCYT1A/LPCAT4/APOA4/NAPEPLD/PLA2G4D/DHDDS/CHKA/ETNK1/PCSK9/LIPG/PLBD1/HMGCS2/FDPS/MVK/IDI1/SPTLC2/FDFT1/PLA2G2A/PNPLA…
Small Intestine	turquoise	BP	GO:0010876	lipid localization	PLA2G4F/PRELID2/TMEM30B/PLA2G10/DGAT1/PLA2G12B/NR1H4/SLC27A2/ABCG8/SLC51A/SMIM22/SLC51B/TNFRSF11A/ABCG5/P2RX4/CEACAM1/PRELID3B/ABCB1/FABP1/FABP2/CPT2/MTTP/SLC27A4/SHH/STARD10/CYP4F2/SLC10A2/ATP10B/C2CD2L/CFTR/ACE/MFSD2A/ATP8B1/CPTP/SLC25A20/STARD4/LCN12/ABCC2/GRAMD1C/APOC3/APOB/FABP6/TTC39B/ABCA5/OSBP/MAP2K6/APOA1/APOM/LIMA1/PPARG/APOA4/ABCA4/VPS4B/APOL6/AKR1C4/CHKA/ANXA2/PCSK9/LIPG/SLC10A7/SOAT2…
Small Intestine	turquoise	BP	GO:0071827	plasma lipoprotein particle organization	DGAT1/MTTP/PLAGL2/P4HB/APOC3/APOB/ABCA5/APOA1/APOM/APOA4/LIPG/SOAT2/PLA2G2A/SCARB1/ABCA1/LCAT/PRKACB
Small Intestine	turquoise	BP	GO:0016137	glycoside metabolic process	GBA3/AKR1C3/AKR1B10/GBA2/NAGA/AKR1C4/AKR7A2/AKR1C2/GBA/GLA
Small Intestine	turquoise	BP	GO:0043691	reverse cholesterol transport	APOC3/ABCA5/APOA1/APOM/APOA4/LIPG/SCARB1/ABCA1/LCAT/CLU
Small Intestine	turquoise	BP	GO:0006869	lipid transport	PLA2G4F/PRELID2/TMEM30B/PLA2G10/PLA2G12B/NR1H4/SLC27A2/ABCG8/SLC51A/SLC51B/TNFRSF11A/ABCG5/P2RX4/CEACAM1/PRELID3B/ABCB1/FABP1/FABP2/CPT2/MTTP/SLC27A4/SHH/STARD10/CYP4F2/SLC10A2/ATP10B/C2CD2L/CFTR/ACE/MFSD2A/ATP8B1/CPTP/SLC25A20/STARD4/LCN12/ABCC2/GRAMD1C/APOC3/APOB/FABP6/TTC39B/ABCA5/OSBP/MAP2K6/APOA1/APOM/LIMA1/PPARG/APOA4/ABCA4/VPS4B/APOL6/AKR1C4/CHKA/ANXA2/PCSK9/LIPG/SLC10A7/SOAT2/PRELID1/PLA2…
Small Intestine	turquoise	BP	GO:0045604	regulation of epidermal cell differentiation	OVOL2/GRHL2/VDR/KDF1/ESRP1/ATOH1/MACROH2A1/AQP3/SFN/MYCL/SULT2B1/REG3A/REG3G/CTSV/ALOX15B/NUMA1/TP63/NOTCH1/ROCK1/PTCH2/ZFP36L1
Small Intestine	turquoise	BP	GO:0019320	hexose catabolic process	FUT6/GALE/TKFC/KHK/FUT2/PKLR/GLYCTK/GALM/FUT4/PFKL/ALDOB/TPI1/HK2/GLB1/GALK1/PGK1/ENO1/FOXK1/HK1/ENO2
Small Intestine	turquoise	BP	GO:0008272	sulfate transport	SLC26A6/SLC25A10/SLC26A3/SLC13A1/SLC26A1/SLC25A14/SLC13A4/SLC25A30/SLC26A4
Small Intestine	turquoise	BP	GO:0071322	cellular response to carbohydrate stimulus	NR1H4/PCK2/MAPK13/SLC26A6/NEUROD1/TRPM4/RFX6/SRI/C1QTNF12/HMGCR/SLC2A5/C2CD2L/CFTR/FOXA2/PCK1/MLXIPL/AACS/GCLM/MAP2K6/GCLC/GCG/ENDOG/XBP1/KCNJ11/CDK16/PHPT1/SIDT2/RAB11B/PPP3CA/ZNF236/ZBTB20/SIN3A/PRKCE/WDR35/PIK3CA/GPLD1/HMGN3/SLC9B2/RAB11FIP2/ZFP36L1
Small Intestine	turquoise	BP	GO:0071941	nitrogen cycle metabolic process	NAGS/NR1H4/CYP2C9/CEBPA/ASL/CPS1/OTC/NMRAL1
Small Intestine	turquoise	BP	GO:1903351	cellular response to dopamine	DNM2/HCN3/MAPK3/SULT1A3/GABPA/SIN3A/MAPK1/LRRK2
Small Intestine	turquoise	BP	GO:0030010	establishment of cell polarity	WWC1/PRKCZ/CAMSAP3/MISP/SLC9A3R1/LLGL2/SHTN1/SHH/PAX6/PAK1/FERMT1/CFL1/NEK3/LAMA1/SYNE4/FRMD4B/ACTR1B/SDCCAG8/FBF1/HSP90AA1/MYH9/WEE1/RHOA/NUMA1/FSCN1/MCPH1/ROCK1/HSP90AB1/CLASP1/LLGL1/FAM89B/RUFY3/CDK5RAP2/RNF41/WDPCP/NDE1/RAB11FIP2/JAM3
Small Intestine	turquoise	BP	GO:0006486	protein glycosylation	DOLPP1/FUT6/MGAT4B/B3GNT8/GALNT5/B3GNT7/B3GNT3/B3GNT6/B3GALT5/GALNT4/GALNT7/SLC51B/GALNT3/FUT3/MUC3A/ABO/MUC2/FUT2/GCNT1/MUC13/MUC17/FUT4/SLC35C1/ST6GALNAC1/GCNT3/GFPT1/MPDU1/MGAT3/GALNT1/NUDT14/MUC12/GALNT6/GALNT14/MUC20/MUC4/COG3/GALNT8/DHDDS/PMM2/TMTC4/PGM3/MGAT2/MAN1A1/MVD/ALG1/B3GALT4/EDEM3/ALG2/B3GLCT/FKTN/OST4/DPM1/GALNT9/RXYLT1/ST3GAL2/MGAT5B/FKRP/FUT11/MAN1C1/B3GALNT1/UBE2G2/ST8SIA1/ST6G…
Small Intestine	turquoise	BP	GO:0043413	macromolecule glycosylation	DOLPP1/FUT6/MGAT4B/B3GNT8/GALNT5/B3GNT7/B3GNT3/B3GNT6/B3GALT5/GALNT4/GALNT7/SLC51B/GALNT3/FUT3/MUC3A/ABO/MUC2/FUT2/GCNT1/MUC13/MUC17/FUT4/SLC35C1/ST6GALNAC1/GCNT3/GFPT1/MPDU1/MGAT3/GALNT1/NUDT14/MUC12/GALNT6/GALNT14/MUC20/MUC4/COG3/GALNT8/DHDDS/PMM2/TMTC4/PGM3/MGAT2/MAN1A1/MVD/ALG1/B3GALT4/EDEM3/ALG2/B3GLCT/FKTN/OST4/DPM1/GALNT9/RXYLT1/ST3GAL2/MGAT5B/FKRP/FUT11/MAN1C1/B3GALNT1/UBE2G2/ST8SIA1/ST6G…
Small Intestine	turquoise	BP	GO:0001523	retinoid metabolic process	DGAT1/ADH6/CYP2S1/AKR1C3/RETSAT/CYP2C18/CYP3A5/UGT1A1/SDC1/AKR1B10/PLB1/UGT1A8/BCO1/RBP2/CYP2D6/ADH1C/APOC3/APOB/CYP3A4/RDH13/APOA1/APOM/APOA4/ABCA4/NAPEPLD/AKR1C4/SCPEP1/ALDH1A3/ADH1B/CYP27C1/RARRES2
Small Intestine	turquoise	BP	GO:0006081	cellular aldehyde metabolic process	TKFC/AKR7A3/KHK/AKR1C3/GLYCTK/PDXK/IDH1/SHPK/ALDOB/BCO1/PNPO/TPI1/RDH13/PNKD/PGD/AKR7A2/ALDH3A2/ALDH3B1/ALDH3A1/AGXT/REST/ALDH1A3/CYP27C1/RELA
Small Intestine	turquoise	BP	GO:0009064	glutamine family amino acid metabolic process	ALDH18A1/NAGS/NR1H4/AGMAT/GGT1/ASL/GFPT1/SLC7A7/CPS1/OTC/PRODH/OAT/GCLM/MTHFS/GCLC/DDAH1/HAL/GLYATL1/SLC7A11/DGLUCY/NIT2/ART4/MECP2/ASNSD1
Small Intestine	turquoise	BP	GO:0009101	glycoprotein biosynthetic process	DOLPP1/FUT6/MGAT4B/B3GNT8/GALNT5/B3GNT7/B3GNT3/B3GNT6/B3GALT5/GALNT4/GALNT7/SLC51B/GALNT3/CANT1/FUT3/MUC3A/ABO/MUC2/FUT2/GCNT1/MUC13/MUC17/FUT4/SLC35C1/ST6GALNAC1/GCNT3/GFPT1/MPDU1/MGAT3/GALNT1/SLC35D1/NCSTN/NUDT14/UGDH/MUC12/GALNT6/GALNT14/MUC20/MUC4/COG3/GALNT8/DHDDS/PMM2/ACOT8/TMTC4/PGM3/MGAT2/CHST13/MAN1A1/MVD/ALG1/B3GALT4/EDEM3/ALG2/B3GLCT/FKTN/OST4/AATF/DPM1/ATP7A/GALNT9/RXYLT1/ST3GAL2/CYTL…
Small Intestine	turquoise	BP	GO:0098659	inorganic cation import across plasma membrane	KCNJ3/ATP1A1/SLC9A2/SLC31A1/SLC39A5/TRPM4/SLC9A3/KCNK5/SLC9A1/SLC12A8/KCNJ13/SLC39A4/ATP1B1/KCNJ4/SLC12A7/TRPV1/SLC12A2/KCNJ11/TRPV6/ATP1A4/RAMP3/HCN2/FXYD2/ISCU/SLC9A9/SLC39A6
Small Intestine	turquoise	BP	GO:0099587	inorganic ion import across plasma membrane	KCNJ3/ATP1A1/SLC9A2/SLC31A1/SLC39A5/TRPM4/SLC9A3/KCNK5/SLC9A1/SLC12A8/KCNJ13/SLC39A4/ATP1B1/KCNJ4/SLC12A7/TRPV1/SLC12A2/KCNJ11/TRPV6/ATP1A4/RAMP3/HCN2/FXYD2/ISCU/SLC9A9/SLC39A6
Small Intestine	turquoise	BP	GO:0045606	positive regulation of epidermal cell differentiation	OVOL2/VDR/KDF1/ATOH1/MACROH2A1/SFN/SULT2B1/ALOX15B/NUMA1/NOTCH1/PTCH2
Small Intestine	turquoise	BP	GO:0006650	glycerophospholipid metabolic process	PLA2G4F/LIPH/CDS1/PLA2G10/PIP5K1B/NR1H4/SERINC2/PLD1/SLC44A4/BPNT1/PLAAT2/PCYT2/SLC44A3/IMPA1/AGPAT2/INPP5J/PI4K2B/STARD10/PLB1/ALPI/SELENOI/PGAP3/MFSD2A/LPIN3/MBOAT7/HADHA/GPD1/MBOAT1/PGAP2/ABHD3/DBI/APOA1/PCYT1A/LPCAT4/APOA4/NAPEPLD/PLA2G4D/CHKA/ETNK1/PLBD1/PLA2G2A/PNPLA3/PIGN/PIGF/PIK3R2/SCARB1/IP6K2/GPAA1/PLA2G4E/PIGV/PLA2G3/PLD2/PI4KAP2/GPAT2/DPM1/INPP5K/PI4KB/SOCS3/RUFY1/PLA2G4C/PI4KA/INPPL…
Small Intestine	turquoise	CC	GO:0005903	brush border	ANKS4B/ESPN/MYO1D/MYH14/USH1C/SCIN/PLS1/VIL1/SLC26A6/MYO7B/SLC9A3R1/KCNK1/PDZD3/MYO1A/SLC3A1/ENPEP/AMN/CDHR2/SLC2A2/SLC9A3/CDHR5/SI/PDZK1/SLC27A4/ACE2/SLC26A3/PLB1/SLC5A1/MME/ATP8B1/SLC6A19/SLC7A9/SLC15A1/MYO1E/ABCC2/TRPM6/TMPRSS15/LIMA1/ITLN1/SOAT2/SLC34A3/SLC7A11/FLII/SLC38A2/MYH9/ATP7A/SLC26A4/HSP90AB1
Small Intestine	turquoise	CC	GO:0045177	apical part of cell	MARVELD2/MYO5B/PRKCZ/SCNN1A/CRB3/EPB41L4B/SLC22A18/SLC17A4/USH1C/DPP4/RAB17/LMO7/ABCC6/ATP1A1/DSG2/PTPRH/ABCG8/OCLN/PLD1/SLC6A20/SLC44A4/REEP6/MAL2/SLC52A3/SLC26A6/MYO7B/SLC9A3R1/KCNK1/ABCG5/CYP4F12/EPCAM/PDZD3/MYO6/CLDN4/SLC1A1/CLIC5/MYO1A/ACY3/CEACAM1/ENPEP/MUC13/MUC17/SHROOM1/AMN/ERBB2/SLC23A1/STX3/ABCB1/CDHR2/SLC2A2/DPEP1/SLC9A3/FABP1/CDHR5/SI/PDZK1/ERBB3/CEACAM20/CYP4F2/SLC26A3/PLB1/SLC2A5/S…
Small Intestine	turquoise	CC	GO:0016324	apical plasma membrane	MARVELD2/PRKCZ/SCNN1A/CRB3/SLC22A18/SLC17A4/DPP4/RAB17/LMO7/ABCC6/ATP1A1/DSG2/PTPRH/ABCG8/OCLN/PLD1/SLC6A20/SLC44A4/MAL2/SLC52A3/SLC26A6/SLC9A3R1/KCNK1/ABCG5/CYP4F12/EPCAM/CLDN4/SLC1A1/CLIC5/MYO1A/ACY3/CEACAM1/ENPEP/MUC13/MUC17/SHROOM1/AMN/ERBB2/SLC23A1/STX3/ABCB1/CDHR2/SLC2A2/DPEP1/SLC9A3/CDHR5/SI/PDZK1/ERBB3/CEACAM20/CYP4F2/SLC26A3/PLB1/SLC2A5/SLC10A2/NAALADL1/SLC5A1/C2CD2L/CFTR/ATP8B1/MGAM/SLC…
Small Intestine	turquoise	CC	GO:0005902	microvillus	ANKS4B/ESPN/FOXA1/USH1C/PLEKHG6/PTPRH/VIL1/MYO7B/SLC9A3R1/MYO6/MYO1A/CEACAM1/CDHR2/KIF13B/DPEP1/CDHR5/IQGAP2/PDZK1/CEACAM20/SLC27A4/STARD10/SLC10A2/CLCA1/PROM1/MUC20/S100P/ATP6V1B2/PROM2/SCARB1/CA9/CTSV/ATP6V1A/AQP5/ATP7A/BBS2/FSCN1/LRRK2/CNP
Small Intestine	turquoise	CC	GO:0098862	cluster of actin-based cell projections	TPRN/ANKS4B/ESPN/MYO1D/MYH14/EPS8L2/USH1C/SCIN/PLS1/VIL1/SLC26A6/MYO7B/SLC9A3R1/KCNK1/PDZD3/MYO1A/SLC3A1/ENPEP/AMN/CDHR2/SLC2A2/SLC9A3/CDHR5/SI/PDZK1/SLC27A4/ACE2/SLC26A3/PLB1/SLC5A1/MME/ATP8B1/SLC6A19/SLC7A9/SLC15A1/MYO1E/ABCC2/TRPM6/TMPRSS15/LIMA1/ITLN1/SOAT2/TRPA1/SLC34A3/SLC7A11/FLII/SLC38A2/CDH23/MYH9/ATP7A/BBS2/MYO15A/SLC26A4/HSP90AB1
Small Intestine	turquoise	CC	GO:0031526	brush border membrane	SLC26A6/SLC9A3R1/KCNK1/SLC3A1/AMN/CDHR2/SLC9A3/CDHR5/PDZK1/SLC27A4/ACE2/SLC26A3/PLB1/SLC5A1/ATP8B1/SLC6A19/SLC7A9/ABCC2/TRPM6/LIMA1/ITLN1/SLC34A3/SLC7A11/ATP7A/SLC26A4/HSP90AB1
Small Intestine	turquoise	CC	GO:0031528	microvillus membrane	PTPRH/SLC9A3R1/CEACAM1/CDHR2/DPEP1/CDHR5/PDZK1/CEACAM20/PROM1/MUC20/S100P/PROM2/SCARB1/CA9
Small Intestine	turquoise	CC	GO:0031253	cell projection membrane	PLA2G4F/WWC1/SCNN1A/MYO1D/EPS8L2/DPP4/PTPRH/SLC26A6/SLC9A3R1/KCNK1/EPS8L3/MYO6/RAB25/CASK/EPS8L1/CEACAM1/SLC3A1/AMN/CDHR2/DPEP1/SLC9A3/CDHR5/PDZK1/CEACAM20/SLC27A4/DNM2/ACE2/MYO10/SLC26A3/PLB1/SLC5A1/ATP8B1/SLC6A19/PROM1/SLC7A9/PLEK2/ABCC2/PAK1/FERMT1/CFL1/TRPM6/MUC20/CDHR1/LIMA1/TRPV1/S100P/ABCA4/NAPEPLD/ITLN1/GABRE/SLC34A3/PTPRJ/PROM2/REG1A/SCARB1/SLC7A11/NOX1/CA9/KCNJ11/FZD9/GRK1/CNTNAP2/GUCA1…
Small Intestine	turquoise	CC	GO:0034451	centriolar satellite	ALDOB/KRT18/PCNT/PIBF1/SDCCAG8/FOPNL/C2CD3/EXOC7/PARD6A/FLOT1/CEP290/CCDC66/BBS9/BBS4/PCM1
Small Intestine	turquoise	CC	GO:0098858	actin-based cell projection	TPRN/ANKS4B/ESPN/FOXA1/EPS8L2/USH1C/PLEKHG6/PTPRH/CXADR/VIL1/MYO7B/SLC9A3R1/SHTN1/MYO6/MYO1A/CEACAM1/CDHR2/KIF13B/DPEP1/CDHR5/IQGAP2/PDZK1/CEACAM20/SLC27A4/STARD10/MYO10/SLC10A2/CLCA1/ATP8B1/PROM1/ITGA6/MUC20/S100P/ATP6V1B2/ACPP/PROM2/CDK5/SCARB1/CA9/FZD9/CTSV/ATP6V1A/VASP/AQP5/CDH23/ATP7A/BBS2/MYO15A/INPPL1/FSCN1/NGDN/RUFY3/LRRK2/CNP/CBX6/APBB1
Small Intestine	turquoise	CC	GO:0043296	apical junction complex	MARVELD2/MARVELD3/PRKCZ/CAMSAP3/CRB3/EPB41L4B/PLEKHA7/TJP3/POF1B/JUP/CLDN23/CLDN15/CLDN7/CDH1/OCLN/CGN/CXADR/F11R/EPCAM/PDZD3/CLDN4/CLDN3/AOC1/SHROOM1/NECTIN4/WNK4/NECTIN1/PATJ/MICALL2/CYTH2/UBN1/CLDN9/PDCD6IP/FRMD4B/VASP/FBF1/RHOA/PARD6A/TBCD/RPGRIP1L/JAM3
Small Intestine	turquoise	CC	GO:0005911	cell-cell junction	MARVELD2/MARVELD3/CNKSR1/PRKCZ/GRHL2/CAMSAP3/CRB3/BAIAP2L1/EPB41L4B/DSC2/DSP/PLEKHA7/TJP3/DPP4/POF1B/JUP/CLDN23/CLDN15/CLDN7/ATP1A1/DSG2/PKP3/CDH1/OCLN/CGN/CXADR/F11R/LSR/EPCAM/CDH17/PDZD3/GJB1/CLDN4/BAIAP2L2/CLDN3/CASK/CEACAM1/AOC1/SHROOM1/STX3/SLC2A2/KRT8/COL17A1/AQP3/STARD10/SLC5A1/NECTIN4/GJB2/SLC9A1/CDCA3/ILDR1/MYO1E/WNK4/ABCC2/PAK1/ATP1B1/NECTIN1/CFL1/ITGA6/PATJ/MICALL2/PKP2/NDRG1/KRT18/LAM…
Small Intestine	turquoise	CC	GO:0005635	nuclear envelope	PRKCZ/HTATIP2/SLC22A18/OIT3/GOLT1A/LMO7/MLX/NLRP6/SLC52A3/GATA6/MVP/RETSAT/P2RX4/MYO6/EBP/NUP62CL/ANXA4/GCHFR/RNF43/RTCB/SEC13/MAPK3/CPTP/PAK1/CERS6/TMEM33/OTULINL/DNASE1/SULT1E1/SH3BGRL2/PCYT1A/ANXA11/DHCR7/NAPEPLD/TMEM170A/RAP1GAP2/MAD2L1BP/CREB3L4/TMEM176B/TM7SF2/MACO1/SYNE4/KCNJ11/IFI27/RGPD1/RNF6/MX1/SLC16A3/NUP58/TMEM120B/CERS3/UNC50/NUP98/RANBP2/NPIPA1/TMEM38A/CACYBP/DNAJB2/KPNA1/PUM2/INTS…
Small Intestine	turquoise	CC	GO:0016323	basolateral plasma membrane	MARVELD2/MAP7/TGFA/DSP/MYO1D/RAB17/CLDN7/ABCC6/ATP1A1/SLC51A/CXADR/SLC51B/SLC26A6/EPCAM/CDH17/SLC39A5/CLDN4/ST14/MYO1A/CASK/CEACAM1/KCNQ1/ERBB2/SLC23A1/MTTP/ERBB3/AQP3/CNNM4/SLC9A1/SLC7A7/CEACAM5/ATP1B1/ATP7B/ITGA6/KCNJ4/CDH16/MUC20/SLC26A1/ANXA2/SLC16A10/PROM2/CA9/SLC40A1/LPO/SLCO4C1/AQP5/ATP7A/FLOT1/NOD1/PIANP/HSP90AB1/STX2/CA11/SLC9B2/CD81/SLC41A1
Small Intestine	turquoise	MF	GO:0022804	active transmembrane transporter activity	SLC37A4/SLC35D2/SLC22A18/SLC17A4/SLC37A1/SLC6A7/ABCC6/ATP1A1/ABCG8/SLC6A20/SLC16A5/SLC26A6/SLC9A2/SLC36A1/ABCG5/CDH17/MCU/SLC1A1/ABCG2/SLC25A1/SLC25A10/SLC23A1/ABCB1/SLC13A2/SLC6A4/SLC5A11/SLC9A3/ATP2C2/SLC35C1/SLC5A9/SLC17A8/SLC26A3/SLC13A1/SLC10A2/SLC5A1/CFTR/MFSD2A/SLC28A1/SLC6A19/SLC9A1/SLC5A12/SLC35D1/SLC12A8/SLC15A1/SLC18A1/MFSD3/ABCC2/ATP1B1/ATP7B/LETM1/ABCA5/SLC28A2/CLCN3/SLC28A3/SLC12A7/…
Small Intestine	turquoise	MF	GO:0008514	organic anion transmembrane transporter activity	TMEM30B/SLC35D2/SLC17A4/SLC6A7/SLC52A1/SLC27A2/SLC51A/SLC6A20/SLC44A4/SLC16A5/SLC51B/SLC52A3/SLC26A6/SLC36A1/SLC25A24/SLC35B1/SLC1A1/SLC25A13/SLC25A1/CEACAM1/SLC3A1/SLC25A10/SLC23A1/SLC13A2/SLC2A2/SLC17A8/SLC26A3/SLC13A1/SLC10A2/CFTR/MFSD2A/ATP8B1/SLC6A19/SLC5A12/SLC7A7/SLC7A9/SLC35D1/ABCC2/SFXN5/SLC35B3/SLC66A1/SLC52A2/SFXN3/SLC26A1/SLC43A2/AKR1C4/SLC10A7/SLC16A10/SLC3A2/SLC7A11/SLC6A14/SLCO4C1/…
Small Intestine	turquoise	MF	GO:0015291	secondary active transmembrane transporter activity	SLC37A4/SLC35D2/SLC22A18/SLC17A4/SLC37A1/SLC6A7/SLC6A20/SLC16A5/SLC26A6/SLC9A2/SLC36A1/CDH17/MCU/SLC1A1/SLC25A1/SLC25A10/SLC23A1/SLC13A2/SLC6A4/SLC5A11/SLC9A3/SLC35C1/SLC5A9/SLC17A8/SLC26A3/SLC13A1/SLC10A2/SLC5A1/MFSD2A/SLC28A1/SLC6A19/SLC9A1/SLC5A12/SLC35D1/SLC12A8/SLC15A1/SLC18A1/MFSD3/LETM1/SLC28A2/CLCN3/SLC28A3/SLC12A7/SLC26A1/SLC12A2/ANKH/SLC10A7/SLC16A10/SLC34A3/SLC3A2/SLC5A2/SLC7A11/SLC6A1…
Small Intestine	turquoise	MF	GO:0005342	organic acid transmembrane transporter activity	SLC17A4/SLC6A7/SLC27A2/SLC51A/SLC6A20/SLC16A5/SLC51B/SLC26A6/SLC36A1/SLC1A1/SLC25A13/SLC25A1/CEACAM1/SLC3A1/SLC25A10/SLC23A1/SLC13A2/SLC17A8/SLC26A3/SLC13A1/SLC10A2/MFSD2A/SLC6A19/SLC5A12/SLC7A7/SLC7A9/ABCC2/SFXN5/SLC66A1/SFXN3/SLC26A1/SLC43A2/AKR1C4/SLC10A7/SLC16A10/SLC3A2/SLC7A11/SLC6A14/SLC35A1/SLC16A3/SLC25A14/SLC13A4/SLC38A2/SLC16A14/SLC1A2/SLC25A29/SLC16A7/SLC25A30/SLC26A4/SLC38A1/SLC38A6/S…
Small Intestine	turquoise	MF	GO:0046943	carboxylic acid transmembrane transporter activity	SLC17A4/SLC6A7/SLC27A2/SLC51A/SLC6A20/SLC16A5/SLC51B/SLC26A6/SLC36A1/SLC1A1/SLC25A13/SLC25A1/CEACAM1/SLC3A1/SLC25A10/SLC23A1/SLC13A2/SLC17A8/SLC26A3/SLC13A1/SLC10A2/MFSD2A/SLC6A19/SLC5A12/SLC7A7/SLC7A9/ABCC2/SFXN5/SLC66A1/SFXN3/SLC26A1/SLC43A2/AKR1C4/SLC10A7/SLC16A10/SLC3A2/SLC7A11/SLC6A14/SLC35A1/SLC16A3/SLC25A14/SLC13A4/SLC38A2/SLC16A14/SLC1A2/SLC25A29/SLC16A7/SLC25A30/SLC26A4/SLC38A1/SLC38A6/S…
Small Intestine	turquoise	MF	GO:0008238	exopeptidase activity	RNPEP/DPP4/PRSS16/CNDP2/GGT6/XPNPEP1/ENPEP/DPEP1/ANPEP/PGPEP1/PEPD/GGT1/ACE2/NAALADL1/ACE/MME/XPNPEP2/DPP3/PREP/CPO/KDM8/CTSA/ERAP1/F11/CPA2/SCRN2/CTSV/CPZ/SCPEP1/NPEPL1/VASH1/AGBL3/AGTPBP1/PRCP/XPNPEP3/PM20D2/AEBP1/MMP17/NAALAD2/METAP1D/LNPEP/SCRN1
Small Intestine	turquoise	MF	GO:0008509	anion transmembrane transporter activity	SLC37A4/TMEM30B/SLC35D2/SLC17A4/SLC37A1/SLC6A7/SLC52A1/SLC27A2/SLC51A/SLC6A20/SLC44A4/SLC16A5/SLC51B/SLC52A3/SLC26A6/SLC36A1/SLC25A24/SLC35B1/CLDN4/SLC1A1/CLIC5/SLC25A13/SLC25A1/CEACAM1/SLC3A1/SLC25A10/SLC23A1/ANO7/SLC13A2/SLC6A4/SLC2A2/SLC17A8/BEST4/SLC26A3/SLC13A1/SLC10A2/FXYD3/CLCA1/CFTR/MFSD2A/ATP8B1/SLC6A19/SLC5A12/BEST2/SLC7A7/SLC7A9/SLC35D1/SLC12A8/SLC18A1/ABCC2/VDAC1/SFXN5/SLC35B3/SLC66A1…
Small Intestine	turquoise	MF	GO:0004177	aminopeptidase activity	RNPEP/DPP4/PRSS16/XPNPEP1/ENPEP/DPEP1/ANPEP/PEPD/NAALADL1/ACE/XPNPEP2/DPP3/KDM8/ERAP1/F11/CTSV/NPEPL1/PRCP/XPNPEP3/MMP17/NAALAD2/METAP1D/LNPEP
Small Intestine	turquoise	MF	GO:0008376	acetylgalactosaminyltransferase activity	B3GNT8/GALNT5/B3GNT7/B3GNT3/B3GNT6/B3GALT5/GALNT4/GALNT7/GALNT3/ABO/GALNT1/B4GALNT3/GALNT6/GALNT14/GALNT8/B3GALT4/GALNT9/CSGALNACT1/CHSY1/B3GALNT1/CSGALNACT2
Small Intestine	turquoise	MF	GO:0046873	metal ion transmembrane transporter activity	NIPAL1/SCNN1A/SLC17A4/KCNJ3/SLC6A7/ATP1A1/SLC6A20/CACNA1D/SLC9A2/KCNK1/TMEM37/SLC31A1/SLC39A5/MCU/P2RX4/SLC1A1/KCNQ1/SLC39A9/TRPM4/SLC23A1/SLC13A2/SLC6A4/SLC5A11/SLC9A3/SLC39A11/ATP2C2/LRRC26/KCNK5/SLC5A9/CNNM4/SLC13A1/SLC10A2/HCN3/SLC5A1/SLC28A1/SLC6A19/SLC9A1/SLC5A12/SLC12A8/KCNH6/KCNJ13/SLC18A1/SLC39A4/ATP1B1/ATP7B/LETM1/SLC30A10/KCNJ4/TRPM6/SLC28A2/KCNV1/SLC28A3/SLC12A7/TRPV1/KCNE3/KCNA6/JPH1…
Small Intestine	turquoise	MF	GO:1901682	sulfur compound transmembrane transporter activity	SLC44A4/SLC26A6/SLC1A1/SLC3A1/SLC25A10/SLC26A3/SLC13A1/SLC7A9/SLC35B3/SLC26A1/SLC19A3/SLC7A11/SLC25A14/SLC13A4/SLC25A30/SLC26A4
Small Intestine	turquoise	MF	GO:0005310	dicarboxylic acid transmembrane transporter activity	SLC26A6/SLC1A1/SLC25A13/SLC25A10/SLC13A2/SLC17A8/SLC26A3/SLC13A1/ABCC2/SLC26A1/SLC7A11/SLC25A14/SLC13A4/SLC1A2/SLC25A30/SLC26A4/SLC25A32
Small Intestine	turquoise	MF	GO:0015370	solute:sodium symporter activity	SLC17A4/SLC6A7/SLC6A20/SLC1A1/SLC23A1/SLC13A2/SLC6A4/SLC5A11/SLC5A9/SLC13A1/SLC10A2/SLC5A1/SLC28A1/SLC6A19/SLC5A12/SLC18A1/SLC28A2/SLC28A3/SLC12A2/SLC34A3/SLC5A2/SLC6A14/SLC5A3/SLC13A4/SLC1A2/SLC38A1
Small Intestine	turquoise	MF	GO:0016628	oxidoreductase activity, acting on the CH-CH group of donors, NAD or NADP as acceptor	AKR1C3/DECR1/PTGR1/DHDH/DHCR24/SRD5A1/PECR/DECR2/DHCR7/TECR/AKR1C2/TM7SF2/BDH2
Small Intestine	turquoise	MF	GO:0016616	oxidoreductase activity, acting on the CH-OH group of donors, NAD or NADP as acceptor	HSD17B2/ADH6/DHRS11/AKR7A3/BDH1/CRYL1/AKR1C3/HSD11B2/HSD17B11/PTGR1/AKR1B10/PRXL2B/CBR1/IDH1/HMGCR/GPD2/HSD3B2/DHDH/HADHA/HSD3B1/ADH1C/UGDH/GPD1/TSTA3/RDH13/AKR1C4/PGD/AKR7A2/HSD17B8/IDH3G/HSD17B4/HSD3B7/ALDH3A1/AKR1C2/BDH2/ADH1B/LDHB
Small Intestine	turquoise	MF	GO:0015081	sodium ion transmembrane transporter activity	SCNN1A/SLC17A4/SLC6A7/ATP1A1/SLC6A20/SLC9A2/KCNK1/SLC1A1/SLC23A1/SLC13A2/SLC6A4/SLC5A11/SLC9A3/SLC5A9/CNNM4/SLC13A1/SLC10A2/HCN3/SLC5A1/SLC28A1/SLC6A19/SLC9A1/SLC5A12/SLC18A1/ATP1B1/SLC28A2/SLC28A3/SLC12A2/SLC34A3/SLC3A2/SLC5A2/SLC6A14/SCN4A/SLC5A3/ATP1A4/SLC13A4/SLC1A2/HCN2/SCN8A/SLC38A1/FXYD2/SLC9A9/SLC9B2/SLC41A1
Small Intestine	turquoise	MF	GO:0016614	oxidoreductase activity, acting on CH-OH group of donors	HSD17B2/ADH6/DHRS11/CHDH/AKR7A3/BDH1/CRYL1/AKR1C3/HSD11B2/HSD17B11/PTGR1/AKR1B10/PRXL2B/CBR1/IDH1/HMGCR/GPD2/HSD3B2/DHDH/HADHA/HSD3B1/ADH1C/UGDH/GPD1/TSTA3/RDH13/AKR1C4/PGD/AKR7A2/HSD17B8/IDH3G/ALDH3A2/HSD17B4/HSD3B7/ALDH3A1/AKR1C2/BDH2/ADH1B/LDHB
Small Intestine	turquoise	MF	GO:0005496	steroid binding	ESRRA/VDR/NR1H4/ATP1A1/HSD11B2/UGT1A1/PROM1/STARD4/UGT1A8/GRAMD1C/APOC3/SULT1E1/SULT2B1/CYP3A4/OSBP/APOA1/APOA4/PAQR5/SOAT2/PROM2/TSPO/OSBPL2/TSPO2/NR1H3/PDIA2/RORA/CYP21A2/ABCA1/NR3C1/ESR1/CD81
Small Intestine	turquoise	MF	GO:0015116	sulfate transmembrane transporter activity	SLC26A6/SLC25A10/SLC26A3/SLC13A1/SLC26A1/SLC25A14/SLC13A4/SLC25A30/SLC26A4
Small Intestine	turquoise	MF	GO:0120015	intermembrane sterol transfer activity	ABCG8/ABCG5/STARD4/GRAMD1C/APOB/OSBP/APOA1/APOA4/OSBPL2/ABCA1
Small Intestine	turquoise	MF	GO:0008235	metalloexopeptidase activity	RNPEP/XPNPEP1/ENPEP/DPEP1/ANPEP/PEPD/ACE2/ACE/XPNPEP2/CPO/ERAP1/CPA2/CPZ/NPEPL1/VASH1/AGBL3/AGTPBP1/XPNPEP3/AEBP1/MMP17/METAP1D/LNPEP
Small Intestine	red	BP	GO:0044242	cellular lipid catabolic process	ACOX1/PPARA/PNPLA1/CROT/ABCD3/GDPD1/AIG1/SCP2/SESN2/HADHB/ABHD6/DAGLA/CYP4A11/CRAT/ABHD12/APOA5/ENPP7/NEU1/ASAH2/ABHD2/HAO2/ACER3/ABCD1/AUH/PNPLA2/ACADM/LIPC/LIPE/FABP7/PEX2/GCDH/IVD/SMPD4
Small Intestine	red	BP	GO:0072329	monocarboxylic acid catabolic process	ACOX1/PPARA/CROT/XYLB/ABCD3/AIG1/SCP2/SESN2/AGXT2/HADHB/CYP4A11/CRAT/PON3/ABHD2/HAO2/ABCD1/AUH/ACADM/LIPE/PEX2/GCDH/IVD
Small Intestine	red	BP	GO:0006631	fatty acid metabolic process	ACOX1/PPARA/POR/APPL2/CROT/ABCD3/AIG1/ACOT11/SCP2/ACOT4/SESN2/LPGAT1/HADHB/DAGLA/CYP4A11/CRAT/APOA5/PON3/ASAH2/ABHD2/HACD2/SCAP/HAO2/ABCD1/AUH/CYP4V2/CYP4F11/ACOT12/BAAT/CYP2A7/ACADM/LIPC/LIPE/INSIG2/PON1/PEX2/GCDH/PTGES/LTA4H/IVD/PTGES3
Small Intestine	red	BP	GO:0009062	fatty acid catabolic process	ACOX1/PPARA/CROT/ABCD3/AIG1/SCP2/SESN2/HADHB/CYP4A11/CRAT/ABHD2/HAO2/ABCD1/AUH/ACADM/LIPE/PEX2/GCDH/IVD
Small Intestine	red	BP	GO:0019395	fatty acid oxidation	ACOX1/PPARA/POR/APPL2/CROT/ABCD3/SCP2/SESN2/HADHB/CRAT/HAO2/ABCD1/AUH/CYP4V2/ACADM/PEX2/GCDH/IVD
Small Intestine	red	BP	GO:0034440	lipid oxidation	ACOX1/PPARA/POR/APPL2/CROT/ABCD3/SCP2/SESN2/HADHB/CRAT/HAO2/ABCD1/AUH/CYP4V2/ACADM/PEX2/GCDH/IVD
Small Intestine	red	BP	GO:0006635	fatty acid beta-oxidation	ACOX1/PPARA/CROT/ABCD3/SCP2/SESN2/HADHB/CRAT/ABCD1/AUH/ACADM/PEX2/GCDH/IVD
Small Intestine	red	BP	GO:0016042	lipid catabolic process	ACOX1/PPARA/PNPLA1/PAFAH2/CROT/ABCD3/GDPD1/AIG1/SCP2/SESN2/HADHB/ABHD6/DAGLA/CYP4A11/CRAT/ABHD12/APOA5/ENPP7/NEU1/ASAH2/ABHD2/HAO2/ACER3/ABCD1/AUH/PNPLA2/ACADM/LIPC/LIPE/FABP7/PEX2/GCDH/IVD/SMPD4/SNX17
Small Intestine	red	BP	GO:0044282	small molecule catabolic process	ACOX1/PPARA/DERA/CHP1/ENTPD5/TAT/RBKS/PDXP/NUDT16/CROT/XYLB/ABCD3/AIG1/SCP2/ACOT4/SESN2/AGXT2/HADHB/CYP4A11/CRAT/CDA/PON3/ABHD2/HAO2/ABCD1/ALDOC/AUH/FUT5/CYP4F11/OXCT2/GLUD1/ACADM/LIPE/PON1/PEX2/GCDH/IVD/PPAT/CARNS1/SNX17/ENTPD1
Small Intestine	red	BP	GO:0046461	neutral lipid catabolic process	PNPLA1/ABHD6/DAGLA/ABHD12/APOA5/ABHD2/PNPLA2/LIPC/LIPE/FABP7
Small Intestine	red	BP	GO:0046464	acylglycerol catabolic process	PNPLA1/ABHD6/DAGLA/ABHD12/APOA5/ABHD2/PNPLA2/LIPC/LIPE/FABP7
Small Intestine	red	BP	GO:0006732	coenzyme metabolic process	PPARA/DERA/PSEN1/ENTPD5/CYB5A/PC/RBKS/PDXP/SUCLG1/CROT/PANK3/ME2/ACOT11/FMO1/ACOT4/VNN1/BTD/BST1/PCBD2/SLC25A16/AHCYL2/ASPDH/HACD2/ABCD1/ALDOC/CYP4F11/ACOT12/BAAT/SLC22A13/NCOR1/SLC5A8/GCDH/MTHFD2/NUP155/RAE1/NUP42/NUP188/ACBD6
Small Intestine	red	BP	GO:0016054	organic acid catabolic process	ACOX1/PPARA/CHP1/TAT/CROT/XYLB/ABCD3/AIG1/SCP2/ACOT4/SESN2/AGXT2/HADHB/CYP4A11/CRAT/PON3/ABHD2/HAO2/ABCD1/AUH/GLUD1/ACADM/LIPE/PON1/PEX2/GCDH/IVD/PPAT/CARNS1
Small Intestine	red	BP	GO:0046395	carboxylic acid catabolic process	ACOX1/PPARA/CHP1/TAT/CROT/XYLB/ABCD3/AIG1/SCP2/ACOT4/SESN2/AGXT2/HADHB/CYP4A11/CRAT/PON3/ABHD2/HAO2/ABCD1/AUH/GLUD1/ACADM/LIPE/PON1/PEX2/GCDH/IVD/PPAT/CARNS1
Small Intestine	red	BP	GO:0046503	glycerolipid catabolic process	PNPLA1/GDPD1/ABHD6/DAGLA/ABHD12/APOA5/ABHD2/PNPLA2/LIPC/LIPE/FABP7/SMPD4
Small Intestine	red	BP	GO:0007031	peroxisome organization	ACOX1/CROT/ABCD3/PEX26/SCP2/ACOT4/TMEM135/PEX11G/CRAT/HAO2/ABCD1/BAAT/PEX2
Small Intestine	red	BP	GO:0030258	lipid modification	ACOX1/PPARA/PIK3C2G/POR/APPL2/CROT/B4GALNT2/ABCD3/SCP2/SESN2/HADHB/CRAT/APOA5/CYP3A7/PIP4K2C/HAO2/ABCD1/AUH/CYP4V2/CYP4A22/ACADM/PEX2/GCDH/IVD/GBGT1
Small Intestine	red	BP	GO:0001676	long-chain fatty acid metabolic process	ACOX1/AIG1/ACOT11/SCP2/ACOT4/DAGLA/CYP4A11/ASAH2/ABCD1/ACOT12/CYP2A7/LIPE/PTGES/LTA4H/PTGES3
Small Intestine	red	BP	GO:0009437	carnitine metabolic process	SLC22A4/POR/CROT/CRAT/ACADM
Small Intestine	red	BP	GO:0046434	organophosphate catabolic process	PPARA/DERA/PSEN1/ENTPD5/PDXP/NUDT16/GDPD1/PDE9A/ABHD6/ABHD12/ENPP3/ENPP7/ASPDH/ABCD1/ALDOC/LIPC/NCOR1/PDE8A/PON1/NUP155/RAE1/NUP42/SMPD4/NUP188/DUT
Small Intestine	red	CC	GO:0005811	lipid droplet	PNPLA1/NSDHL/AQP7/TMEM135/GBF1/SPAST/TRAF6/PNPLA2/HSD17B13/LIPE/RAB5C/AQP10/ATG2A/SET
Small Intestine	red	CC	GO:0044438	microbody part	ACOX1/SYT7/CROT/ABCD3/PEX26/SCP2/ACOT4/TMEM135/PEX11G/CRAT/HAO2/ABCD1/BAAT/PEX2/IMPDH2
Small Intestine	red	CC	GO:0044439	peroxisomal part	ACOX1/SYT7/CROT/ABCD3/PEX26/SCP2/ACOT4/TMEM135/PEX11G/CRAT/HAO2/ABCD1/BAAT/PEX2/IMPDH2
Small Intestine	red	CC	GO:0005777	peroxisome	ACOX1/SYT7/MARC2/CROT/ABCD3/PEX26/SCP2/ACOT4/TMEM135/PEX11G/GBF1/CRAT/HAO2/ABCD1/BAAT/PEX2/IMPDH2
Small Intestine	red	CC	GO:0042579	microbody	ACOX1/SYT7/MARC2/CROT/ABCD3/PEX26/SCP2/ACOT4/TMEM135/PEX11G/GBF1/CRAT/HAO2/ABCD1/BAAT/PEX2/IMPDH2
Small Intestine	red	CC	GO:0005765	lysosomal membrane	SLC30A4/CLCN5/PSEN1/SLC17A5/SYT7/MEAK7/RNF152/SPPL2A/GNA11/ITM2C/RILP/VNN1/ATP6V0D1/GDAP2/TMEM59/ABHD6/CUBN/NEU1/CYBRD1/ABCD1/SLC30A2/RAB5C/ATP11A/LMBRD1/CP/LITAF/PLEKHF1/NPRL3/ATP6V1G1/SLC15A3/ANXA6
Small Intestine	red	CC	GO:0098852	lytic vacuole membrane	SLC30A4/CLCN5/PSEN1/SLC17A5/SYT7/MEAK7/RNF152/SPPL2A/GNA11/ITM2C/RILP/VNN1/ATP6V0D1/GDAP2/TMEM59/ABHD6/CUBN/NEU1/CYBRD1/ABCD1/SLC30A2/RAB5C/ATP11A/LMBRD1/CP/LITAF/PLEKHF1/NPRL3/ATP6V1G1/SLC15A3/ANXA6
Small Intestine	red	CC	GO:0005774	vacuolar membrane	SLC30A4/CLCN5/PSEN1/SLC17A5/SYT7/MEAK7/RNF152/SPPL2A/GNA11/ITM2C/RILP/VNN1/ATP6V0D1/GDAP2/TMEM59/ABHD6/CUBN/NEU1/CYBRD1/ABCD1/ABCC11/SLC30A2/RAB5C/ATP11A/LMBRD1/ATG9B/CP/LITAF/PLEKHF1/NPRL3/STING1/ATP6V1G1/SLC15A3/ANXA6
Small Intestine	red	MF	GO:0016746	transferase activity, transferring acyl groups	AGPAT3/NAA60/ZDHHC3/GPAT3/CROT/CERS2/LPCAT3/SCP2/NAT8/LPGAT1/ALAS1/HADHB/CRAT/SAT2/GGT3P/SPTLC3/GGT2/ZDHHC5/TMEM68/NAT16/BAAT/ZDHHC7/ZDHHC20/TGM3/TGM4/NMT1/TAF9/ZDHHC2/HCFC1/KAT2A
Small Intestine	red	MF	GO:0050662	coenzyme binding	ACOX1/TAT/PC/POR/MARC2/TPMT/FMO4/PANK3/ME2/ACOT11/SCP2/FMO1/AGXT2/ALAS1/ASPDH/HAO2/SPTLC3/CRYZ/ACOT12/ACBD4/GLUD1/ACADM/SIRT5/GCDH/IVD/KDM1A/DHODH/CARNS1/PPOX/PRMT1/ACBD6/P3H1
Small Intestine	red	MF	GO:0052689	carboxylic ester hydrolase activity	PNPLA1/BPHL/PAFAH2/GDPD1/ACOT11/ACOT4/ABHD6/ABHD12/PON3/ABHD2/ACHE/ACOT12/BAAT/PNPLA2/LIPC/LIPE/PON1/IARS1
Small Intestine	red	MF	GO:0016747	transferase activity, transferring acyl groups other than amino-acyl groups	AGPAT3/NAA60/ZDHHC3/GPAT3/CROT/CERS2/LPCAT3/SCP2/NAT8/LPGAT1/ALAS1/HADHB/CRAT/SAT2/SPTLC3/ZDHHC5/NAT16/BAAT/ZDHHC7/ZDHHC20/NMT1/TAF9/ZDHHC2/HCFC1/KAT2A
Small Intestine	red	MF	GO:0015293	symporter activity	SLC17A5/SLC22A4/SLC22A5/SLC5A4/SLC10A5/SLC34A2/SLC6A13/SLC17A1/MFSD4B/SLC4A7/SLC45A2/SLC16A4/SLC16A9/SLC38A4/SLC6A12/SLC10A1/SLC5A8/SLC15A3

## Sheet: Liver_without ncRNAs_GO
Table S3-3: GO enrichment of the liver without ncRNAs (group 3).
Tissue	Module	ONTOLOGY	ID	Description	GeneID
liver	blue	BP	GO:0044282	small molecule catabolic process	ACBD5/PCYOX1/MMUT/SORD/PECR/AMACR/EHHADH/ALDH5A1/AADAT/AKR1D1/ECI2/ACOX2/ENTPD5/CYP39A1/ADH5/DAO/HADH/ETFBKMT/ADH4/SULT1E1/PCK2/ACOX1/UPB1/ACADL/PKLR/ALDH3A2/IRS1/HNMT/PON1/PAH/HAO1/BCKDHB/CROT/HOGA1/DPYD/HAGH/ALDH7A1/GSTZ1/ALDH1B1/SARDH/DPYS/QDPR/BDH2/ACADSB/CYP4F2/OTC/DBT/HIBADH/GALM/SCP2/HAO2/CRYL1/AIG1/ALDH8A1/GOT2/ALDH6A1/ACADM/ALDH1L1/PIPOX/PHYH/QPRT/GCDH/MAT1A/HIBCH/XYLB/AKR1A1/GLUD1/NUDT5…
liver	blue	BP	GO:0016054	organic acid catabolic process	ACBD5/PCYOX1/MMUT/SORD/PECR/AMACR/EHHADH/ALDH5A1/AADAT/AKR1D1/ECI2/ACOX2/CYP39A1/DAO/HADH/ETFBKMT/PCK2/ACOX1/ACADL/ALDH3A2/IRS1/HNMT/PON1/PAH/HAO1/BCKDHB/CROT/HOGA1/ALDH7A1/GSTZ1/SARDH/QDPR/BDH2/ACADSB/CYP4F2/OTC/DBT/HIBADH/SCP2/HAO2/CRYL1/AIG1/ALDH8A1/GOT2/ALDH6A1/ACADM/ALDH1L1/PIPOX/PHYH/QPRT/GCDH/MAT1A/HIBCH/XYLB/AKR1A1/GLUD1/MCCC2/FAH/ABAT/ACACB/MLYCD/ABCD3/DDAH1/MCEE/DDO/SULT2A1/AHCY/HSD17B1…
liver	blue	BP	GO:0046395	carboxylic acid catabolic process	ACBD5/PCYOX1/MMUT/SORD/PECR/AMACR/EHHADH/ALDH5A1/AADAT/AKR1D1/ECI2/ACOX2/CYP39A1/DAO/HADH/ETFBKMT/PCK2/ACOX1/ACADL/ALDH3A2/IRS1/HNMT/PON1/PAH/HAO1/BCKDHB/CROT/HOGA1/ALDH7A1/GSTZ1/SARDH/QDPR/BDH2/ACADSB/CYP4F2/OTC/DBT/HIBADH/SCP2/HAO2/CRYL1/AIG1/ALDH8A1/GOT2/ALDH6A1/ACADM/ALDH1L1/PIPOX/PHYH/QPRT/GCDH/MAT1A/HIBCH/XYLB/AKR1A1/GLUD1/MCCC2/FAH/ABAT/ACACB/MLYCD/ABCD3/DDAH1/MCEE/DDO/SULT2A1/AHCY/HSD17B1…
liver	blue	BP	GO:1901605	alpha-amino acid metabolic process	MMUT/ALDH5A1/AADAT/IYD/GLYAT/DAO/BHMT2/ART4/HNMT/ADI1/PAH/HOGA1/NIT2/ALDH7A1/GSTZ1/GATM/SARDH/QDPR/OTC/HIBADH/ALDH8A1/GOT2/BHMT/ALDH6A1/PIPOX/GCDH/MAT1A/GLYATL1/GCLC/HIBCH/GLUD1/SEPSECS/MCCC2/FAH/BAAT/DDAH1/AHCYL2/DDO/GGT1/AHCY/HMGCLL1/ASS1/COMT/KMO/PSPH/GLDC/OAT/GLUL/CTPS2/CTPS1/MECP2/NOX4/FPGS/IL4I1/MTHFR/PHYKPL/ASNS/PYCR2/ATP2B4
liver	blue	BP	GO:0006631	fatty acid metabolic process	ACBD5/MMUT/PECR/AMACR/EHHADH/ALDH5A1/ECI2/ACOX2/HADH/ETFBKMT/PCK2/ACOX1/ACADL/ALDH3A2/IRS1/PON1/HAO1/CBR4/CROT/PRKAB2/GSTZ1/RGN/BDH2/ACADSB/CYP4F2/CYP2C9/EPHX2/SCP2/HAO2/CRYL1/AIG1/NAAA/ACSM5/CYP2C18/ACADM/PDK2/CYP2J2/GSTA1/ACSM3/PHYH/HSD17B8/GCDH/HIBCH/HACD2/DGAT2/CBR1/AKR1C4/HPGD/ANGPTL3/ERLIN2/GPAM/ELOVL2/CYP1A2/PDK4/ACACB/MLYCD/CYP3A4/CYP7A1/LIPC/ABCD3/ACSL6/BAAT/MCEE/SGPL1/ACSL1/FASN/GGT1/GN…
liver	blue	BP	GO:0006520	cellular amino acid metabolic process	PCYOX1/MMUT/ALDH5A1/AADAT/FOLH1B/IYD/BPHL/GLYAT/DAO/FOLH1/UPB1/BHMT2/ART4/HNMT/ADI1/DDC/PAH/BCKDHB/HOGA1/NIT2/DPYD/ALDH7A1/GSTZ1/GATM/SARDH/DPYS/QDPR/ACADSB/OTC/DBT/HIBADH/ALDH8A1/GOT2/BHMT/ALDH6A1/PIPOX/GCDH/MAT1A/GLYATL1/GCLC/HIBCH/GLUD1/SEPSECS/MCCC2/FN3K/FAH/ABAT/TARS2/BAAT/DDAH1/AHCYL2/DDO/GGT1/AHCY/SLC3A1/HSD17B10/HMGCLL1/ASS1/COMT/KMO/PSPH/GLDC/OAT/GLUL/CTPS2/AASDH/CTPS1/MECP2/NOX4/FPGS/IL…
liver	blue	BP	GO:0072329	monocarboxylic acid catabolic process	ACBD5/MMUT/SORD/PECR/AMACR/EHHADH/ALDH5A1/AKR1D1/ECI2/ACOX2/CYP39A1/HADH/ETFBKMT/PCK2/ACOX1/ACADL/ALDH3A2/IRS1/HAO1/CROT/HOGA1/BDH2/CYP4F2/SCP2/HAO2/CRYL1/AIG1/ACADM/PHYH/GCDH/HIBCH/XYLB/AKR1A1/FAH/ABAT/ACACB/MLYCD/ABCD3/MCEE/SULT2A1/ECH1
liver	blue	BP	GO:0009063	cellular amino acid catabolic process	PCYOX1/ALDH5A1/AADAT/DAO/HNMT/PAH/BCKDHB/HOGA1/ALDH7A1/GSTZ1/SARDH/QDPR/ACADSB/OTC/DBT/HIBADH/ALDH8A1/GOT2/ALDH6A1/PIPOX/GCDH/MAT1A/HIBCH/GLUD1/MCCC2/FAH/ABAT/DDAH1/DDO/AHCY/HSD17B10/HMGCLL1/KMO/GLDC/OAT/GLUL/IL4I1/PHYKPL/ATP2B4
liver	blue	BP	GO:0042737	drug catabolic process	CAT/AADAT/DAO/FMO4/SULT1E1/PCK2/MAOB/PAH/HAO1/DPYD/GSTZ1/ALDH1B1/DPYS/QDPR/CYP2C9/CYP2C18/NNT/CYP2J2/PIPOX/QPRT/NT5E/PRDX3/ALDH2/CYP1A2/FAH/CYP3A4/CTSH/SULT2A1/ADAL/CYP2E1/ADH7/CYP2A13/COMT/CYP2U1/GLDC/PDXP/DUOX2/IL4I1/GNPDA1/GPX1/GPX3
liver	blue	BP	GO:0006732	coenzyme metabolic process	DHTKD1/AADAT/ENTPD5/DHFR/GLYAT/FOLH1/BHMT2/PKLR/CBR4/CROT/ACOT13/GSTZ1/IDH1/RGN/QDPR/PANK1/CYP4F2/NADK2/HMGCS2/ACSM5/ALDH1L1/NNT/PDK2/PIPOX/ACSM3/HSD17B8/QPRT/GCDH/MAT1A/GCLC/HACD2/DGAT2/AKR1A1/COQ5/NT5E/PGM1/MCCC2/MAT2B/ELOVL2/PDK4/CBFA2T3/SUCLG2/ACACB/PDSS2/MLYCD/ACSL6/BAAT/AHCYL2/GCK/MCEE/GALK1/ARNT/ACSL1/FASN/AHCY/DBI/NMNAT3/FBP1/SLC19A1/KMO/PPTC7/PDXP/SHPK/NAXD/PC/NADK/INSR/NUP62/FPGS/VNN3/M…
liver	blue	BP	GO:0007031	peroxisome organization	CAT/PECR/AMACR/EHHADH/ECI2/ACOX2/DAO/ACOX1/HAO1/CROT/IDH1/DHRS4/EPHX2/SCP2/HAO2/PIPOX/PHYH/TMEM135/PEX11B/MLYCD/ABCD3/BAAT/DDO/GNPAT/SEC16B/CRYZL2P-SEC16B/PEX10/ECH1/MPV17
liver	blue	BP	GO:0006805	xenobiotic metabolic process	CMBL/FMO3/BPHL/BCHE/GLYAT/NAT1/CYP2C9/EPHX2/GHR/CYP2C18/CYP2J2/GSTA1/UGT2B15/GSTA4/AKR7A2/CYP1A2/MGST2/MARC1/EPHX1/CYP3A4/GSTA2/BAAT/AHR/NAT2/UGT2B11/ARNT/NQO2/AKR7A3/ACSL1/GGT1/CYP2E1/CYP2A13/CYP2U1/UGT2B28/UGT1A7/CYB5R3
liver	blue	BP	GO:1901606	alpha-amino acid catabolic process	AADAT/DAO/HNMT/PAH/HOGA1/ALDH7A1/GSTZ1/SARDH/QDPR/OTC/HIBADH/ALDH8A1/GOT2/ALDH6A1/PIPOX/GCDH/MAT1A/HIBCH/GLUD1/MCCC2/FAH/DDAH1/DDO/AHCY/HMGCLL1/KMO/GLDC/OAT/GLUL/IL4I1/PHYKPL/ATP2B4
liver	blue	BP	GO:0006790	sulfur compound metabolic process	PCYOX1/MMUT/ALDH5A1/AADAT/GLYAT/SULT1E1/BHMT2/ADI1/CBR4/ACOT13/HAGH/GSTZ1/IDH1/ENPP1/HMGCS2/GHR/ACSM5/BHMT/PDK2/NUBPL/GSTA1/PIPOX/ACSM3/HSD17B8/GCDH/MAT1A/GCLC/HACD2/DGAT2/SLC26A1/AKR1A1/MMACHC/SLC35D1/GSTA4/MCCC2/MAT2B/ELOVL2/PDK4/MGST2/SUCLG2/ACACB/SOD1/MLYCD/GSTA2/ACSL6/BAAT/AHCYL2/MCEE/CHST7/SULT2A1/ACSL1/FASN/GGT1/AHCY/DBI/ABCC2/EGFLAM/COMT/PC/MMS19/SULT4A1/NOX4/ST3GAL4/GPX1/MTHFR/CHST1/CHPF…
liver	blue	BP	GO:0046394	carboxylic acid biosynthetic process	DHTKD1/PECR/AMACR/AKR1D1/FOLH1B/ACOX2/ENTPD5/DHFR/CYP39A1/FOLH1/UPB1/ACADL/BHMT2/PKLR/ADI1/PAH/CBR4/HOGA1/PRKAB2/DPYD/RGN/GATM/CYP2C9/OTC/EPHX2/SCP2/ALDH8A1/GOT2/ACSM5/BHMT/ACSM3/HSD17B8/HACD2/CBR1/AKR1A1/SLC35D1/AKR1C4/HPGD/GLUD1/ERLIN2/PGM1/ELOVL2/CYP1A2/ABAT/PDK4/CBFA2T3/MGST2/ACACB/MLYCD/CYP3A4/UGP2/CYP7A1/LIPC/ABCD3/BAAT/GCK/GALK1/ARNT/FASN/GGT1/CYP2E1/FBP1/ASS1/KMO/PROX1/PSPH/OAT/GLUL/OSBPL…
liver	blue	BP	GO:0016053	organic acid biosynthetic process	DHTKD1/PECR/AMACR/AKR1D1/FOLH1B/ACOX2/ENTPD5/DHFR/CYP39A1/FOLH1/UPB1/ACADL/BHMT2/PKLR/ADI1/PAH/CBR4/HOGA1/PRKAB2/DPYD/RGN/GATM/CYP2C9/OTC/EPHX2/SCP2/ALDH8A1/GOT2/ACSM5/BHMT/ACSM3/HSD17B8/HACD2/CBR1/AKR1A1/SLC35D1/AKR1C4/HPGD/GLUD1/ERLIN2/PGM1/ELOVL2/CYP1A2/ABAT/PDK4/CBFA2T3/MGST2/ACACB/MLYCD/CYP3A4/UGP2/CYP7A1/LIPC/ABCD3/BAAT/GCK/GALK1/ARNT/FASN/GGT1/CYP2E1/FBP1/ASS1/KMO/PROX1/PSPH/OAT/GLUL/OSBPL…
liver	blue	BP	GO:0006625	protein targeting to peroxisome	CAT/PECR/AMACR/EHHADH/ECI2/ACOX2/DAO/ACOX1/HAO1/CROT/IDH1/DHRS4/EPHX2/SCP2/HAO2/PIPOX/PHYH/MLYCD/BAAT/DDO/GNPAT/PEX10/ECH1/MPV17
liver	blue	BP	GO:0072662	protein localization to peroxisome	CAT/PECR/AMACR/EHHADH/ECI2/ACOX2/DAO/ACOX1/HAO1/CROT/IDH1/DHRS4/EPHX2/SCP2/HAO2/PIPOX/PHYH/MLYCD/BAAT/DDO/GNPAT/PEX10/ECH1/MPV17
liver	blue	BP	GO:0072663	establishment of protein localization to peroxisome	CAT/PECR/AMACR/EHHADH/ECI2/ACOX2/DAO/ACOX1/HAO1/CROT/IDH1/DHRS4/EPHX2/SCP2/HAO2/PIPOX/PHYH/MLYCD/BAAT/DDO/GNPAT/PEX10/ECH1/MPV17
liver	blue	BP	GO:0071466	cellular response to xenobiotic stimulus	CMBL/FMO3/BPHL/BCHE/GLYAT/PCK2/NAT1/CYP2C9/EPHX2/GHR/CYP2C18/CYP2J2/GSTA1/UGT2B15/GSTA4/SRD5A1/AKR7A2/CYP1A2/MGST2/MARC1/EPHX1/CYP3A4/GSTA2/BAAT/AHR/NAT2/UGT2B11/ARNT/NQO2/AKR7A3/ACSL1/GGT1/CYP2E1/ABCC2/CYP2A13/ASS1/CYP2U1/TMEM38A/UGT2B28/UGT1A7/CYB5R3/ICAM1
liver	blue	BP	GO:0043574	peroxisomal transport	CAT/PECR/AMACR/EHHADH/ECI2/ACOX2/DAO/ACOX1/HAO1/CROT/IDH1/DHRS4/EPHX2/SCP2/HAO2/PIPOX/PHYH/MLYCD/BAAT/DDO/GNPAT/PEX10/ECH1/MPV17
liver	blue	BP	GO:0006575	cellular modified amino acid metabolic process	PCYOX1/DMGDH/ALDH5A1/IYD/DHFR/BBOX1/FOLH1/ACADL/BHMT2/ALDH9A1/CROT/HOGA1/HAGH/ALDH7A1/GSTZ1/IDH1/GATM/SARDH/GOT2/BHMT/ACADM/ALDH1L1/GSTA1/PIPOX/GCLC/MMACHC/GSTA4/MGST2/SOD1/DIO1/GSTA2/AHCYL2/GGT1/AHCY/SLC19A1/ASS1/DUOX2/DIO3/FPGS/VNN3/GPX1/MTHFR/VNN2/SERINC2/SLC5A6
liver	blue	BP	GO:0034754	cellular hormone metabolic process	ADH6/AKR1D1/ADH1B/ADH4/SULT1E1/ADH1C/CYP2C9/ESR1/SRD5A2/ALDH8A1/UGT2B7/CYP2C18/HSD17B8/DGAT2/AKR1C4/TTR/AFP/ALDH1A1/HSD17B6/SRD5A1/RBP4/CYP1A2/CYP3A4/UGT2B11/SGPL1/ADH7/COMT/RDH12/HSD3B1/UGT1A7/CRABP2/SCARB1/TSPO/CYP21A2
liver	blue	BP	GO:0009062	fatty acid catabolic process	ACBD5/MMUT/PECR/AMACR/EHHADH/ECI2/ACOX2/HADH/ETFBKMT/PCK2/ACOX1/ACADL/ALDH3A2/IRS1/HAO1/CROT/BDH2/CYP4F2/SCP2/HAO2/AIG1/ACADM/PHYH/GCDH/HIBCH/ACACB/MLYCD/ABCD3/MCEE/ECH1
liver	blue	BP	GO:0034308	primary alcohol metabolic process	ADH6/PECR/ADH1B/ADH5/ADH4/SULT1E1/ALDH3A2/ADH1C/HAO1/CBR4/ALDH1B1/NAPEPLD/NAAA/DGAT2/AKR1A1/AKR1C4/TTR/ALDH1A1/ALDH2/AKR7A2/RBP4/CYP1A2/CYP3A4/SULT2A1/ADH7/RDH12
liver	blue	BP	GO:0016999	antibiotic metabolic process	DHTKD1/CAT/ADH6/ALDH5A1/ADH1B/ADH5/ADH4/SULT1E1/PCK2/ADH1C/MAOB/CBR4/GNE/IDH1/ALDH1B1/SDHC/NNT/SLC34A1/AKR1A1/AKR1C4/ALDH1A1/PRDX3/ALDH2/AKR7A2/CYP1A2/SUCLG2/SOD1/SULT2A1/FAHD1/ABCC2/MPV17L/ADH7/DUOX2/GNPDA1/GPX1/GPX3
liver	blue	BP	GO:0008202	steroid metabolic process	CAT/AMACR/AKR1D1/ACOX2/CYP39A1/FAXDC2/SULT1E1/SEC14L2/ACADL/PON1/DHRS4/CYP2C9/ESR1/EPHX2/SRD5A2/SCP2/HMGCS2/UGT2B7/HSD17B8/CYP3A43/DGAT2/AKR1C4/UGT2B15/AFP/ANGPTL3/SC5D/ERLIN2/GPAM/SORL1/HSD17B6/SRD5A1/CYP1A2/EBPL/ACACB/SOD1/CYP3A4/CYP7A1/LIPC/BAAT/UGT2B11/SGPL1/SULT2A1/FASN/CYP2E1/COMT/SNAI2/PROX1/HSD3B1/LBR/UGT2B28/OSBPL6/PBX1/SULT4A1/FGF23/MECP2/PIAS4/SCARB1/CYB5R3/TSPO/CYP21A2
liver	blue	BP	GO:0016042	lipid catabolic process	ACBD5/MMUT/PECR/AMACR/EHHADH/AKR1D1/ECI2/ACOX2/CYP39A1/GBA3/HADH/ETFBKMT/SULT1E1/PCK2/ACOX1/ACADL/ALDH3A2/IRS1/HAO1/CROT/IDH1/BDH2/CYP4F2/GPLD1/SCP2/HAO2/NAPEPLD/AIG1/NAAA/ACADM/CES5A/PHYH/GCDH/HIBCH/ANGPTL3/SORL1/HSD17B6/SRD5A1/CYP1A2/PLD1/MGST2/ACACB/MLYCD/CYP3A4/CYP7A1/LIPC/ABCD3/MCEE/SGPL1/SULT2A1/ECH1/PNPLA3/PLCZ1/LDAH/PLCH2/FGF23/ABHD4/SCARB1/SMPD2/CRTC3
liver	blue	BP	GO:0033865	nucleoside bisphosphate metabolic process	AADAT/GLYAT/SULT1E1/CBR4/CROT/ACOT13/GSTZ1/PANK1/ENPP1/HMGCS2/ACSM5/PDK2/PIPOX/ACSM3/HSD17B8/GCDH/HACD2/DGAT2/SLC26A1/MCCC2/ELOVL2/PDK4/SUCLG2/ACACB/MLYCD/ACSL6/BAAT/MCEE/SULT2A1/ACSL1/FASN/DBI/SULT4A1/PANK4
liver	blue	BP	GO:0033875	ribonucleoside bisphosphate metabolic process	AADAT/GLYAT/SULT1E1/CBR4/CROT/ACOT13/GSTZ1/PANK1/ENPP1/HMGCS2/ACSM5/PDK2/PIPOX/ACSM3/HSD17B8/GCDH/HACD2/DGAT2/SLC26A1/MCCC2/ELOVL2/PDK4/SUCLG2/ACACB/MLYCD/ACSL6/BAAT/MCEE/SULT2A1/ACSL1/FASN/DBI/SULT4A1/PANK4
liver	blue	BP	GO:0034032	purine nucleoside bisphosphate metabolic process	AADAT/GLYAT/SULT1E1/CBR4/CROT/ACOT13/GSTZ1/PANK1/ENPP1/HMGCS2/ACSM5/PDK2/PIPOX/ACSM3/HSD17B8/GCDH/HACD2/DGAT2/SLC26A1/MCCC2/ELOVL2/PDK4/SUCLG2/ACACB/MLYCD/ACSL6/BAAT/MCEE/SULT2A1/ACSL1/FASN/DBI/SULT4A1/PANK4
liver	blue	BP	GO:0009064	glutamine family amino acid metabolic process	ALDH5A1/AADAT/DAO/ART4/NIT2/OTC/GOT2/GLYATL1/GCLC/GLUD1/FAH/DDAH1/GGT1/ASS1/OAT/GLUL/CTPS2/CTPS1/MECP2/FPGS/ASNS/PYCR2/ATP2B4
liver	blue	BP	GO:0019395	fatty acid oxidation	PECR/AMACR/EHHADH/ECI2/ACOX2/HADH/ETFBKMT/ACOX1/ACADL/ALDH3A2/IRS1/HAO1/CROT/BDH2/SCP2/HAO2/ACADM/PHYH/GCDH/HIBCH/DGAT2/PDK4/ACACB/MLYCD/ABCD3/ECH1/ADH7
liver	blue	BP	GO:0042445	hormone metabolic process	ADH6/MME/AKR1D1/ADH1B/IYD/ADH4/SULT1E1/ADH1C/ALDH9A1/CYP2C9/SCG5/ESR1/SRD5A2/GHR/ALDH8A1/UGT2B7/CYP2C18/HSD17B8/DGAT2/AKR1C4/TTR/AFP/ALDH1A1/HSD17B6/SRD5A1/RBP4/CYP1A2/CYP3A4/DIO1/UGT2B11/SGPL1/DDO/ARNT/ACE2/ADH7/COMT/RDH12/HSD3B1/UGT1A7/CRABP2/DUOX2/MECP2/DIO3/SCARB1/TSPO/CYP21A2
liver	blue	BP	GO:0034440	lipid oxidation	PECR/AMACR/EHHADH/ECI2/ACOX2/HADH/ETFBKMT/ACOX1/ACADL/ALDH3A2/IRS1/HAO1/CROT/BDH2/SCP2/HAO2/ACADM/PHYH/GCDH/HIBCH/DGAT2/PDK4/ACACB/MLYCD/ABCD3/ECH1/ADH7
liver	blue	BP	GO:0006069	ethanol oxidation	ADH6/ADH1B/ADH5/ADH4/ADH1C/ALDH1B1/ALDH1A1/ALDH2/ADH7
liver	blue	BP	GO:0006066	alcohol metabolic process	CAT/ADH6/SORD/PECR/AKR1D1/ADH1B/DHFR/CYP39A1/ADH5/ADH4/SULT1E1/PCK2/SEC14L2/ACADL/ALDH3A2/PON1/ADH1C/HAO1/CBR4/ALDH1B1/DHRS4/QDPR/PLCL2/EPHX2/NAPEPLD/HMGCS2/NAAA/SLC34A1/DGAT2/AKR1A1/AKR1C4/TTR/ANGPTL3/SC5D/ERLIN2/GPAM/SORL1/ALDH1A1/ALDH2/AKR7A2/RBP4/CYP1A2/ACACB/SOD1/CYP3A4/CYP7A1/LIPC/GALK1/SULT2A1/FASN/ADH7/PLCZ1/RDH12/LBR/INPP5A/NUDT4/PLCH2/MECP2/INPP4A/INPP5J/SCARB1/CYB5R3
liver	blue	BP	GO:0015849	organic acid transport	SLC6A1/SLC25A13/SLC16A2/SLC38A11/SLC10A1/CROT/SLC22A9/PRKAB2/SLC6A12/CYP4F2/SFXN2/SFXN1/THRSP/SLCO1B1/GOT2/SLCO1B3/SLC26A1/SLC35D1/AKR1C4/ARL6IP1/SLC38A4/ABAT/SLC7A9/AQP9/ACACB/SLCO1B7/ABCD3/APBA1/SLC25A20/SLC16A4/SLC17A1/SLC13A2/SLC35A5/ARL6IP5/SLC16A13/ACSL1/SLC16A10/SLC3A1/MAP2K6/SLC16A12/ACE2/ABCC2/SLC19A1/KMO/SYT1/SLC16A11/PPFIA3/SLC26A8/RGS4/P2RX4/SLC13A5/SLC7A5/GIPC1/STXBP1/SLC38A5/NFKBIE/…
liver	blue	BP	GO:0046942	carboxylic acid transport	SLC6A1/SLC25A13/SLC16A2/SLC38A11/SLC10A1/CROT/SLC22A9/PRKAB2/SLC6A12/CYP4F2/SFXN2/SFXN1/THRSP/SLCO1B1/GOT2/SLCO1B3/SLC26A1/SLC35D1/AKR1C4/ARL6IP1/SLC38A4/ABAT/SLC7A9/AQP9/ACACB/SLCO1B7/ABCD3/APBA1/SLC25A20/SLC16A4/SLC17A1/SLC13A2/SLC35A5/ARL6IP5/SLC16A13/ACSL1/SLC16A10/SLC3A1/MAP2K6/SLC16A12/ACE2/ABCC2/SLC19A1/KMO/SYT1/SLC16A11/PPFIA3/SLC26A8/RGS4/P2RX4/SLC13A5/SLC7A5/GIPC1/STXBP1/SLC38A5/NFKBIE/…
liver	blue	BP	GO:0051188	cofactor biosynthetic process	DHTKD1/ALAD/ENTPD5/DHFR/PKLR/MAOB/CBR4/HAGH/GSTZ1/RGN/QDPR/BDH2/PANK1/NADK2/PDK2/HSD17B8/QPRT/GCDH/MAT1A/GCLC/HACD2/AKR1A1/MMACHC/COQ5/PGM1/MAT2B/ELOVL2/CYP1A2/PDK4/CBFA2T3/MGST2/ACACB/PDSS2/SOD1/MLYCD/ACSL6/GCK/GALK1/ARNT/ACSL1/FASN/GGT1/NMNAT3/MPV17L/FBP1/KMO/PPTC7/NAXD/DUOX2/NADK/INSR/NUP62/FPGS/PANK4/TSPO/PDXK/ALDOA
liver	blue	BP	GO:0009410	response to xenobiotic stimulus	CMBL/FMO3/SLC6A1/BPHL/BCHE/GLYAT/PCK2/HNMT/NAT1/CYP2C9/HOMER2/EPHX2/GHR/GOT2/CYP2C18/CYP2J2/GSTA1/GCLC/UGT2B15/GSTA4/SRD5A1/AKR7A2/CYP1A2/ABAT/MGST2/MARC1/EPHX1/SOD1/CYP3A4/GSTA2/BAAT/AHR/NAT2/UGT2B11/ARNT/NQO2/AKR7A3/ACSL1/GGT1/CYP2E1/ABCC2/CYP2A13/ASS1/CYP2U1/TMEM38A/UGT2B28/UGT1A7/RGS4/GPX1/CYB5R3/EPO/ICAM1
liver	blue	BP	GO:0030258	lipid modification	PECR/AMACR/EHHADH/ECI2/ACOX2/HADH/ETFBKMT/ACOX1/ACADL/ALDH3A2/IRS1/HAO1/CROT/PI4K2B/BDH2/EPHX2/SCP2/HAO2/PIK3R1/ACADM/PHYH/MTM1/GCDH/HIBCH/DGAT2/PIK3C2G/PDK4/PLPPR1/ACACB/MLYCD/CYP3A4/ABCD3/CYP2E1/ECH1/DGKB/ADH7/INPP5A/CISH/PIP5KL1/INPP5J/ST3GAL4/PIP5K1C/DGKZ/SLC35C1/SOCS1
liver	blue	BP	GO:0044242	cellular lipid catabolic process	ACBD5/MMUT/PECR/AMACR/EHHADH/ECI2/ACOX2/GBA3/HADH/ETFBKMT/PCK2/ACOX1/ACADL/ALDH3A2/IRS1/HAO1/CROT/IDH1/BDH2/CYP4F2/GPLD1/SCP2/HAO2/NAPEPLD/AIG1/ACADM/PHYH/GCDH/HIBCH/ANGPTL3/SORL1/MGST2/ACACB/MLYCD/LIPC/ABCD3/MCEE/SGPL1/ECH1/PNPLA3/SCARB1/SMPD2
liver	blue	BP	GO:0006067	ethanol metabolic process	ADH6/ADH1B/ADH5/ADH4/SULT1E1/ADH1C/ALDH1B1/ALDH1A1/ALDH2/SULT2A1/ADH7
liver	blue	BP	GO:1901616	organic hydroxy compound catabolic process	SORD/AKR1D1/CYP39A1/ADH4/SULT1E1/MAOB/HAO1/ALDH1B1/CYP4F2/ALDH2/FAH/CYP7A1/SULT2A1/ADH7/COMT/INPP5A/PDXP/FGF23/DIO3/INPP5J/SCARB1
liver	blue	BP	GO:0006721	terpenoid metabolic process	ADH6/PECR/ADH1B/ADH5/ADH4/ALDH3A2/ADH1C/SDC2/CYP2C9/NAPEPLD/HMGCS2/ALDH8A1/CYP2C18/DGAT2/AKR1C4/TTR/ALDH1A1/SRD5A1/GPC6/RBP4/CYP1A2/CYP3A4/CYP2E1/ADH7/RDH12/UGT1A7/CRABP2/GPC2
liver	blue	BP	GO:0015711	organic anion transport	SLC6A1/SLC25A13/ATP11C/SLC2A2/SLC16A2/SLC38A11/SLC10A1/MTTP/CROT/SLC22A9/PRKAB2/SLC6A12/TMEM30B/CYP4F2/SFXN2/SFXN1/SCP2/THRSP/SLCO1B1/SLC35A3/GOT2/SLCO1B3/SLC26A1/SLC35D1/AKR1C4/SLCO4C1/ARL6IP1/SLC38A4/ABAT/SLC22A10/SLC7A9/AQP9/ACACB/SLCO1B7/ABCD3/APBA1/SLC25A20/SLC16A4/SLC17A1/SLC4A4/SLC13A2/SLC35A5/ARL6IP5/SLC16A13/ACSL1/SLC16A10/SLC3A1/MAP2K6/SLC16A12/ACE2/ABCC2/SLC19A1/KMO/SYT1/SLC16A11/PPFIA…
liver	blue	BP	GO:0008652	cellular amino acid biosynthetic process	FOLH1B/FOLH1/UPB1/BHMT2/ADI1/PAH/DPYD/GATM/OTC/GOT2/BHMT/GLUD1/ABAT/GGT1/ASS1/PSPH/OAT/GLUL/MTHFR/ASNS/PYCR2/ATP2B4
liver	blue	BP	GO:1901568	fatty acid derivative metabolic process	ACOX1/PON1/CBR4/BDH2/CYP4F2/CYP2C9/EPHX2/HMGCS2/CYP2C18/CYP2J2/GSTA1/HSD17B8/GCDH/HACD2/DGAT2/CBR1/AKR1C4/HPGD/ELOVL2/CYP1A2/MGST2/ACSL6/ACSL1/FASN/GGT1/CYP2E1/HMGCLL1/CYP2A13/CYP2U1/PRXL2B/ATP6V1B1/GPX1/TNFRSF1A/MAPKAPK2
liver	blue	BP	GO:0008209	androgen metabolic process	AKR1D1/ESR1/SRD5A2/UGT2B7/HSD17B8/AKR1C4/HSD17B6/SRD5A1/CYP3A4/SGPL1/HSD3B1/SCARB1
liver	blue	BP	GO:0006720	isoprenoid metabolic process	ADH6/PECR/ADH1B/ADH5/ADH4/ALDH3A2/ADH1C/SDC2/CYP2C9/NAPEPLD/HMGCS2/ALDH8A1/CYP2C18/PHYH/DGAT2/AKR1C4/TTR/ALDH1A1/SRD5A1/GPC6/RBP4/CYP1A2/PDSS2/CYP3A4/CYP2E1/ADH7/RDH12/UGT1A7/CRABP2/GPC2
liver	blue	BP	GO:0009066	aspartate family amino acid metabolic process	AADAT/BHMT2/ADI1/NIT2/ALDH7A1/GOT2/BHMT/PIPOX/GCDH/MAT1A/AHCYL2/DDO/AHCY/ASS1/MTHFR/PHYKPL/ASNS
liver	blue	BP	GO:0006637	acyl-CoA metabolic process	AADAT/GLYAT/CBR4/ACOT13/GSTZ1/HMGCS2/ACSM5/PDK2/PIPOX/ACSM3/HSD17B8/GCDH/HACD2/DGAT2/ELOVL2/PDK4/SUCLG2/ACACB/MLYCD/ACSL6/BAAT/MCEE/ACSL1/FASN/DBI
liver	blue	BP	GO:0035383	thioester metabolic process	AADAT/GLYAT/CBR4/ACOT13/GSTZ1/HMGCS2/ACSM5/PDK2/PIPOX/ACSM3/HSD17B8/GCDH/HACD2/DGAT2/ELOVL2/PDK4/SUCLG2/ACACB/MLYCD/ACSL6/BAAT/MCEE/ACSL1/FASN/DBI
liver	blue	BP	GO:0043648	dicarboxylic acid metabolic process	ALDH5A1/GRHPR/AADAT/DHFR/HOGA1/NIT2/IDH1/L2HGDH/GOT2/ALDH1L1/PHYH/QPRT/GCLC/GLUD1/SUCLG2/DDO/GGT1/SLC19A1/ASS1/KMO/OAT/GLUL/FPGS/MTHFR
liver	blue	BP	GO:0042219	cellular modified amino acid catabolic process	PCYOX1/DMGDH/ACADL/HOGA1/SARDH/GOT2/BHMT/ALDH1L1/GGACT/GGT1/AHCY/DIO3
liver	blue	BP	GO:0042135	neurotransmitter catabolic process	DMGDH/ALDH5A1/HNMT/MAOB/ALDH7A1/SARDH/BHMT/ABAT/COMT/GLDC
liver	blue	BP	GO:0016101	diterpenoid metabolic process	ADH6/PECR/ADH1B/ADH5/ADH4/ALDH3A2/ADH1C/SDC2/NAPEPLD/ALDH8A1/CYP2C18/DGAT2/AKR1C4/TTR/ALDH1A1/SRD5A1/GPC6/RBP4/CYP1A2/CYP3A4/ADH7/RDH12/UGT1A7/CRABP2/GPC2
liver	blue	BP	GO:0072330	monocarboxylic acid biosynthetic process	DHTKD1/PECR/AMACR/AKR1D1/ACOX2/ENTPD5/CYP39A1/ACADL/PKLR/CBR4/HOGA1/PRKAB2/RGN/CYP2C9/EPHX2/SCP2/ALDH8A1/ACSM5/ACSM3/HSD17B8/HACD2/CBR1/AKR1C4/HPGD/ERLIN2/PGM1/ELOVL2/CYP1A2/ABAT/PDK4/CBFA2T3/ACACB/MLYCD/CYP3A4/CYP7A1/LIPC/ABCD3/BAAT/GCK/GALK1/ARNT/FASN/CYP2E1/FBP1/KMO/PROX1/OSBPL6/CRABP2/PRXL2B/INSR/NUP62/ASNS/NR1H2/ALDOA
liver	blue	BP	GO:0006766	vitamin metabolic process	MMUT/DHFR/RGN/CYP4F2/ENPP1/ALDH1L1/TTPA/GCLC/CBR1/AKR1A1/MMACHC/MCCC2/CLYBL/CYP3A4/SLC19A1/SNAI2/KMO/PDXP/PC/FGF23/PIAS4/FPGS/VNN3/MTHFR/CYB5R3/VNN2/PDXK/SLC5A6
liver	blue	BP	GO:0006635	fatty acid beta-oxidation	AMACR/EHHADH/ECI2/ACOX2/HADH/ETFBKMT/ACOX1/ACADL/IRS1/CROT/BDH2/SCP2/ACADM/GCDH/HIBCH/ACACB/MLYCD/ABCD3/ECH1
liver	blue	BP	GO:0009108	coenzyme biosynthetic process	DHTKD1/ENTPD5/DHFR/PKLR/CBR4/GSTZ1/RGN/QDPR/PANK1/NADK2/PDK2/HSD17B8/QPRT/GCDH/MAT1A/HACD2/AKR1A1/COQ5/PGM1/MAT2B/ELOVL2/PDK4/CBFA2T3/ACACB/PDSS2/MLYCD/ACSL6/GCK/GALK1/ARNT/ACSL1/FASN/NMNAT3/FBP1/KMO/PPTC7/NAXD/NADK/INSR/NUP62/FPGS/PANK4/PDXK/ALDOA
liver	blue	BP	GO:0042133	neurotransmitter metabolic process	DMGDH/ALDH5A1/BCHE/GLYAT/UPB1/HNMT/ALDH9A1/DDC/MAOB/PAH/DPYD/ALDH7A1/RGN/SARDH/DPYS/BHMT/SRD5A1/ABAT/BAAT/DDAH1/ASS1/COMT/GLDC/AASDH/SLC22A2/INSR/P2RX4/TSPO/ICAM1/ATP2B4
liver	blue	BP	GO:0006767	water-soluble vitamin metabolic process	MMUT/DHFR/RGN/ENPP1/ALDH1L1/GCLC/AKR1A1/MMACHC/MCCC2/CLYBL/SLC19A1/KMO/PDXP/PC/FPGS/VNN3/MTHFR/CYB5R3/VNN2/PDXK/SLC5A6
liver	blue	BP	GO:0006063	uronic acid metabolic process	SORD/CRYL1/UGT2B7/XYLB/AKR1A1/UGT2B15/UGT2A3/UGT2B11/UGT2B28/UGT1A7
liver	blue	BP	GO:0019585	glucuronate metabolic process	SORD/CRYL1/UGT2B7/XYLB/AKR1A1/UGT2B15/UGT2A3/UGT2B11/UGT2B28/UGT1A7
liver	blue	BP	GO:0005996	monosaccharide metabolic process	SORD/ALDH5A1/SLC25A13/PCK2/PKLR/IRS1/KAT2B/RGN/GPLD1/GALM/ENPP1/CRYL1/GOT2/UGT2B7/PDK2/GCLC/XYLB/DGAT2/AKR1A1/COX11/UGT2B15/NUDT5/POFUT1/ALDH1A1/PGM1/RBP4/GSK3B/PDK4/ACACB/MLYCD/UGT2A3/UGT2B11/GCK/GALK1/FBP1/FOXA2/UGT2B28/UGT1A7/SIK1/PC/INSR/DHDH/CHST1/CYB5R3/MIDN/ALDOA
liver	blue	BP	GO:0001505	regulation of neurotransmitter levels	DMGDH/ALDH5A1/SLC6A1/BCHE/GLYAT/UPB1/HNMT/ALDH9A1/DDC/MAOB/PAH/DPYD/BACE1/ALDH7A1/RGN/SARDH/DPYS/NAAA/LRRK2/BHMT/RHOT1/ARL6IP1/SRD5A1/GSK3B/ABAT/BAAT/APBA1/DDAH1/ARL6IP5/ASS1/PFN2/COMT/KMO/SYT1/GLDC/GLUL/AASDH/SLC22A2/NRXN2/PPFIA3/INSR/RGS4/P2RX4/SYT12/GIPC1/SYT8/STXBP1/SEPTIN5/TSPO/PIP5K1C/ICAM1/ATP2B4/FLOT1
liver	blue	BP	GO:0044272	sulfur compound biosynthetic process	BHMT2/ADI1/CBR4/HAGH/GSTZ1/BHMT/PDK2/GSTA1/HSD17B8/GCDH/MAT1A/GCLC/HACD2/SLC26A1/AKR1A1/SLC35D1/GSTA4/MAT2B/ELOVL2/PDK4/MGST2/ACACB/MLYCD/GSTA2/ACSL6/CHST7/ACSL1/FASN/GGT1/ST3GAL4/MTHFR/CHST1/CHPF/B4GALT3
liver	blue	BP	GO:1901607	alpha-amino acid biosynthetic process	BHMT2/ADI1/PAH/GATM/OTC/GOT2/BHMT/GLUD1/GGT1/ASS1/PSPH/OAT/GLUL/MTHFR/ASNS/PYCR2/ATP2B4
liver	blue	BP	GO:0009081	branched-chain amino acid metabolic process	BCKDHB/ACADSB/DBT/HIBADH/ALDH6A1/HIBCH/MCCC2/HSD17B10/HMGCLL1
liver	blue	BP	GO:0009083	branched-chain amino acid catabolic process	BCKDHB/ACADSB/DBT/HIBADH/ALDH6A1/HIBCH/MCCC2/HSD17B10/HMGCLL1
liver	blue	BP	GO:0051289	protein homotetramerization	CAT/ALDH5A1/UPB1/ACADL/ALDH9A1/CBR4/ACOT13/DPYS/ST13/MAT1A/ACACB/HSD17B10/FBP1/TRPM8/GOLGA2/TRPM4/TRPM2/CRTC3/GPX3/ALDOA/SOD2
liver	blue	BP	GO:0098754	detoxification	CAT/IYD/DHFR/ADH5/ADH4/GSTZ1/RGN/ABCG2/PRXL2A/NNT/GSTA1/AKR1A1/PRDX3/MGST2/MARC1/SOD1/FANCC/AKR7A3/ABCC2/RDH12/DUOX2/SELENOW/PRXL2B/GPX1/GPX3/SOD2
liver	blue	BP	GO:0019748	secondary metabolic process	DDC/CBR4/BDH2/RAPGEF2/PMEL/AKR1A1/AKR1C4/AKR7A2/CYP1A2/AKR7A3/WNT5A/ABCC2/CYP2A13/DDT/UGT1A7/MC1R/GIPC1
liver	blue	BP	GO:0006081	cellular aldehyde metabolic process	GRHPR/ADH5/ADH4/ALDH3A2/ALDH9A1/HOGA1/HAGH/ALDH7A1/IDH1/ALDH8A1/GOT2/AKR1A1/ALDH1A1/AKR7A2/AKR7A3/PDXP/SHPK/PDXK
liver	blue	BP	GO:0006577	amino-acid betaine metabolic process	DMGDH/BBOX1/ACADL/ALDH9A1/CROT/ALDH7A1/BHMT/ACADM
liver	blue	BP	GO:0000096	sulfur amino acid metabolic process	PCYOX1/MMUT/BHMT2/ADI1/BHMT/MAT1A/GCLC/AHCYL2/GGT1/AHCY/COMT/NOX4/MTHFR
liver	blue	BP	GO:0006706	steroid catabolic process	AKR1D1/CYP39A1/SULT1E1/HSD17B6/SRD5A1/CYP1A2/CYP3A4/CYP7A1/FGF23/SCARB1
liver	blue	BP	GO:0001523	retinoid metabolic process	ADH6/ADH1B/ADH5/ADH4/ADH1C/SDC2/NAPEPLD/ALDH8A1/CYP2C18/DGAT2/AKR1C4/TTR/ALDH1A1/GPC6/RBP4/CYP1A2/CYP3A4/ADH7/RDH12/UGT1A7/CRABP2/GPC2
liver	blue	BP	GO:1990748	cellular detoxification	CAT/IYD/DHFR/ADH5/ADH4/GSTZ1/RGN/ABCG2/PRXL2A/NNT/GSTA1/AKR1A1/PRDX3/MGST2/SOD1/FANCC/RDH12/DUOX2/SELENOW/PRXL2B/GPX1/GPX3/SOD2
liver	blue	BP	GO:0006541	glutamine metabolic process	ALDH5A1/NIT2/GLYATL1/GLUD1/GLUL/CTPS2/CTPS1/MECP2/ASNS
liver	blue	BP	GO:0017001	antibiotic catabolic process	CAT/ADH5/ADH4/SULT1E1/PCK2/ALDH1B1/NNT/PRDX3/ALDH2/SULT2A1/ADH7/DUOX2/GNPDA1/GPX1/GPX3
liver	blue	BP	GO:0015718	monocarboxylic acid transport	SLC6A1/SLC16A2/SLC10A1/CROT/SLC22A9/PRKAB2/SLC6A12/CYP4F2/THRSP/SLCO1B1/GOT2/SLCO1B3/AKR1C4/ABAT/AQP9/ACACB/SLCO1B7/ABCD3/APBA1/SLC25A20/SLC16A4/SLC16A13/ACSL1/MAP2K6/SLC16A12/ABCC2/SLC16A11/P2RX4/SLC5A6
liver	blue	BP	GO:0051262	protein tetramerization	CAT/ALDH5A1/UPB1/ACADL/ALDH9A1/CBR4/ACOT13/DPYS/DHRS4/ST13/HSD17B8/MAT1A/ACACB/PDSS2/TRPM7/GRIN2B/HSD17B10/FBP1/TRPM8/TRPM3/GOLGA2/H3C4/H4C5/INSR/TRPM4/TRPM2/CRTC3/GPX3/ALDOA/SOD2
liver	blue	BP	GO:0046597	negative regulation of viral entry into host cell	TRIM26/IFITM1/TRIM59/TRIM31/TRIM8/TRIM11/IFITM3/IFITM2
liver	blue	BP	GO:0019432	triglyceride biosynthetic process	PCK2/AGMO/RGN/GPLD1/THRSP/DGAT2/GPAM/ACSL1/PNPLA3/SIK1/SCARB1/NR1H2
liver	blue	BP	GO:0042572	retinol metabolic process	ADH6/ADH1B/ADH4/ADH1C/DGAT2/TTR/ALDH1A1/RBP4/CYP1A2/CYP3A4/ADH7/RDH12
liver	blue	BP	GO:0046164	alcohol catabolic process	SORD/AKR1D1/CYP39A1/ADH4/SULT1E1/HAO1/ALDH1B1/ALDH2/CYP7A1/SULT2A1/ADH7/INPP5A/INPP5J/SCARB1
liver	blue	BP	GO:0033540	fatty acid beta-oxidation using acyl-CoA oxidase	AMACR/EHHADH/ECI2/ACOX2/ACOX1/CROT/SCP2
liver	blue	BP	GO:0051260	protein homooligomerization	MICU1/ALAD/CAT/ALDH5A1/SLC6A1/UPB1/ACADL/ALDH9A1/CBR4/ACOT13/KCTD3/DPYS/ST13/OTC/AQP11/SLC34A1/MAT1A/SLC22A1/PEX11B/CLYBL/ACACB/P2RX3/LGI1/SIGMAR1/HSD17B10/SCARA5/FBP1/TRPM8/FGFRL1/DISP1/SYT1/SPAG9/TMEM38A/GLUL/KCNA6/GOLGA2/P2RX4/RHOC/SPTBN5/TRPM4/TRPM2/CRTC3/PRMT1/JMJD6/MLKL/GPX3/ALDOA/SOD2/TGM2/FLOT1
liver	blue	BP	GO:0046185	aldehyde catabolic process	ADH5/ADH4/HOGA1/HAGH/AKR1A1/PDXP
liver	blue	BP	GO:0033866	nucleoside bisphosphate biosynthetic process	CBR4/GSTZ1/PANK1/PDK2/HSD17B8/GCDH/HACD2/SLC26A1/ELOVL2/PDK4/ACACB/MLYCD/ACSL6/ACSL1/FASN/PANK4
liver	blue	BP	GO:0034030	ribonucleoside bisphosphate biosynthetic process	CBR4/GSTZ1/PANK1/PDK2/HSD17B8/GCDH/HACD2/SLC26A1/ELOVL2/PDK4/ACACB/MLYCD/ACSL6/ACSL1/FASN/PANK4
liver	blue	BP	GO:0034033	purine nucleoside bisphosphate biosynthetic process	CBR4/GSTZ1/PANK1/PDK2/HSD17B8/GCDH/HACD2/SLC26A1/ELOVL2/PDK4/ACACB/MLYCD/ACSL6/ACSL1/FASN/PANK4
liver	blue	BP	GO:0098656	anion transmembrane transport	PCYOX1/CLCN5/SLC25A13/SLC38A11/SLC22A9/PRKAB2/SLC6A12/THRSP/SLC35A3/SLC34A1/ANO1/ANO6/SLC26A1/SLC35D1/ARL6IP1/SLC38A4/SLC7A9/AQP9/ACACB/SLC20A2/SLC25A20/SLC17A1/SLC4A4/ARL6IP5/SLC16A10/SLC3A1/SLC16A12/SLC19A1/SLC16A11/ANKH/SLC4A3/SLC26A8/RGS4/SLC12A4/SLC13A5/SLC7A5/SLC4A11/SLC9A1/SLC38A5/GABRR2/PRAF2/BEST1/SLC5A6
liver	blue	BP	GO:0019373	epoxygenase P450 pathway	CYP4F2/CYP2C9/EPHX2/CYP2C18/CYP2J2/CYP1A2/CYP2E1/CYP2A13
liver	blue	BP	GO:0006865	amino acid transport	SLC6A1/SLC25A13/SLC38A11/SLC6A12/SFXN2/SFXN1/ARL6IP1/SLC38A4/ABAT/SLC7A9/APBA1/ARL6IP5/SLC16A10/SLC3A1/SLC16A12/ACE2/KMO/SYT1/PPFIA3/RGS4/SLC7A5/GIPC1/STXBP1/SLC38A5/NFKBIE/PRAF2
liver	blue	BP	GO:0046460	neutral lipid biosynthetic process	PCK2/AGMO/RGN/GPLD1/THRSP/DGAT2/GPAM/ACSL1/PNPLA3/SIK1/SCARB1/NR1H2
liver	blue	BP	GO:0046463	acylglycerol biosynthetic process	PCK2/AGMO/RGN/GPLD1/THRSP/DGAT2/GPAM/ACSL1/PNPLA3/SIK1/SCARB1/NR1H2
liver	blue	BP	GO:0006690	icosanoid metabolic process	ACOX1/PON1/CYP4F2/CYP2C9/EPHX2/CYP2C18/CYP2J2/GSTA1/CBR1/AKR1C4/HPGD/CYP1A2/MGST2/GGT1/CYP2E1/CYP2A13/CYP2U1/PRXL2B/ATP6V1B1/GPX1/TNFRSF1A/MAPKAPK2
liver	blue	BP	GO:0006694	steroid biosynthetic process	AMACR/AKR1D1/ACOX2/CYP39A1/FAXDC2/SEC14L2/SRD5A2/SCP2/HMGCS2/HSD17B8/AKR1C4/SC5D/ERLIN2/GPAM/HSD17B6/SRD5A1/ACACB/SOD1/CYP3A4/CYP7A1/BAAT/FASN/SNAI2/PROX1/HSD3B1/LBR/OSBPL6/PBX1/SCARB1/CYB5R3/TSPO/CYP21A2
liver	blue	BP	GO:0042180	cellular ketone metabolic process	AADAT/ETFBKMT/ADH4/ACADL/IRS1/CBR4/PRKAB2/HAGH/GSTZ1/RGN/DHRS4/CYP4F2/SRD5A2/ALDH8A1/GOT2/BHMT/PDK2/DGAT2/AKR1A1/AKR1C4/AFP/COQ5/ERLIN2/SRD5A1/AKR7A2/PDK4/ACACB/PDSS2/MLYCD/CYP7A1/CRYZL1/COMT/KMO/PROX1/PPTC7/OAZ1/NR1H2/ATP2B4
liver	blue	BP	GO:0097164	ammonium ion metabolic process	DMGDH/BCHE/BBOX1/DAO/ACADL/HNMT/PON1/ALDH9A1/DDC/MAOB/CBR4/CROT/ALDH7A1/SARDH/GPLD1/BHMT/ACADM/AKR1A1/AKR1C4/SGMS1/SRD5A1/AKR7A2/ABAT/SPTLC3/LIPC/CEPT1/DBI/COMT/MECP2/ABHD4/SCARB1/SMPD2/LPCAT1
liver	blue	BP	GO:1901661	quinone metabolic process	ADH4/CBR4/CYP4F2/AKR1A1/AKR1C4/COQ5/AKR7A2/PDSS2/CRYZL1/PPTC7
liver	blue	BP	GO:0001676	long-chain fatty acid metabolic process	ACOX1/ACADL/CYP4F2/CYP2C9/EPHX2/SCP2/AIG1/CYP2C18/CYP2J2/GSTA1/CBR1/HPGD/ELOVL2/CYP1A2/CYP3A4/ACSL6/ACSL1/CYP2E1/CYP2A13/PNPLA3/CYP2U1
liver	blue	BP	GO:0006730	one-carbon metabolic process	DHFR/SFXN1/ALDH1L1/MAT1A/MAT2B/AHCYL2/AHCY/FPGS/MTHFR
liver	blue	BP	GO:1901617	organic hydroxy compound biosynthetic process	AMACR/AKR1D1/ACOX2/DHFR/CYP39A1/FAXDC2/DAO/PCK2/SEC14L2/DDC/PAH/QDPR/PLCL2/SRD5A2/SCP2/HMGCS2/RAPGEF2/PMEL/AKR1C4/SC5D/ERLIN2/GPAM/ACACB/SOD1/CYP3A4/CYP7A1/BAAT/FASN/WNT5A/SNAI2/PROX1/PLCZ1/DDT/LBR/OSBPL6/MC1R/PLCH2/GIPC1/CYB5R3/PDXK
liver	blue	BP	GO:0010038	response to metal ion	ALAD/CAT/SORD/SLC6A1/SLC25A13/PKLR/MAOB/BACE1/QDPR/OTC/GPLD1/LRRK2/SLC34A1/GCLC/TF/SLC40A1/DLG2/CDH1/CYP1A2/ATP7B/CAMK2D/ABAT/AQP9/SOD1/SLC30A4/WNT5A/ABCC2/FBP1/ASS1/SYT1/ZNF658/ENDOG/CPNE9/FGF23/KCNMB3/P2RX4/SYT12/SYT8/BSG/GIPR/CPNE7/S100A16/TSPO/TRPM2/DAXX/CPNE5/PEF1/ICAM1/TCIRG1/GDI1
liver	blue	BP	GO:0007584	response to nutrient	ALAD/CAT/AGL/BCHE/TMBIM6/PKLR/BCKDHB/OTC/TRIM24/TTPA/NNT/PDK2/SLC34A1/GCLC/SOD1/P2RX3/BRIP1/ACSL1/GNPAT/AHCY/ASS1/SNAI2/FOXA2/PDXP/FGF23/P2RX4/GIPR/ALPL/MTHFR/EPO/TSPO/TRPM4/PIM1/NOD2
liver	blue	BP	GO:1903825	organic acid transmembrane transport	SLC25A13/SLC38A11/PRKAB2/SLC6A12/THRSP/SLC35D1/ARL6IP1/SLC38A4/SLC7A9/AQP9/ACACB/SLC25A20/ARL6IP5/SLC16A10/SLC3A1/SLC16A12/SLC19A1/SLC16A11/RGS4/SLC13A5/SLC7A5/SLC38A5/PRAF2/SLC5A6
liver	blue	BP	GO:1905039	carboxylic acid transmembrane transport	SLC25A13/SLC38A11/PRKAB2/SLC6A12/THRSP/SLC35D1/ARL6IP1/SLC38A4/SLC7A9/AQP9/ACACB/SLC25A20/ARL6IP5/SLC16A10/SLC3A1/SLC16A12/SLC19A1/SLC16A11/RGS4/SLC13A5/SLC7A5/SLC38A5/PRAF2/SLC5A6
liver	blue	BP	GO:0046486	glycerolipid metabolic process	CAT/ALDH5A1/CRLS1/PCK2/PON1/PI4K2B/AGMO/RGN/ETNK2/GPLD1/PIGV/THRSP/NAPEPLD/PIK3R1/MTM1/DGAT2/GPAM/AGPAT3/SORL1/PIK3C2G/PLD1/PIGN/LIPC/CEPT1/ACSL1/GNPAT/CYP2E1/DBI/ETNPPL/DGKB/CWH43/PNPLA3/INPP5A/SIK1/PLCH2/PLEKHA4/MECP2/CISH/PIP5KL1/INPP4A/INPP5J/CPNE7/MBOAT7/ABHD4/GPX1/SCARB1/CDIPT/PIP5K1C/DGKZ/PGS1/NR1H2/PITPNM1/SERINC2/LPCAT1/SOCS1
liver	blue	BP	GO:0009068	aspartate family amino acid catabolic process	AADAT/ALDH7A1/GOT2/PIPOX/GCDH/MAT1A/DDO/PHYKPL
liver	blue	BP	GO:0009310	amine catabolic process	DMGDH/AADAT/HNMT/ALDH7A1/SARDH/BHMT/KMO/ATP2B4
liver	blue	BP	GO:0035384	thioester biosynthetic process	CBR4/GSTZ1/PDK2/HSD17B8/GCDH/HACD2/ELOVL2/PDK4/ACACB/MLYCD/ACSL6/ACSL1/FASN
liver	blue	BP	GO:0071616	acyl-CoA biosynthetic process	CBR4/GSTZ1/PDK2/HSD17B8/GCDH/HACD2/ELOVL2/PDK4/ACACB/MLYCD/ACSL6/ACSL1/FASN
liver	blue	BP	GO:0006633	fatty acid biosynthetic process	PECR/ACADL/CBR4/PRKAB2/RGN/CYP2C9/EPHX2/ACSM5/ACSM3/HSD17B8/HACD2/CBR1/HPGD/ERLIN2/ELOVL2/CYP1A2/PDK4/ACACB/MLYCD/CYP3A4/CYP7A1/LIPC/ABCD3/FASN/CYP2E1/PRXL2B/NR1H2
liver	blue	BP	GO:0006576	cellular biogenic amine metabolic process	DMGDH/AADAT/HNMT/DDC/ALDH7A1/SARDH/NAPEPLD/NAAA/BHMT/GCDH/KMO/MECP2/OAZ1
liver	blue	BP	GO:0042738	exogenous drug catabolic process	CYP2C9/CYP2C18/CYP2J2/CYP1A2/CYP3A4/CYP2E1/CYP2A13/CYP2U1
liver	blue	BP	GO:0006699	bile acid biosynthetic process	AMACR/AKR1D1/ACOX2/CYP39A1/SCP2/AKR1C4/CYP7A1/BAAT/PROX1/OSBPL6
liver	blue	BP	GO:0006749	glutathione metabolic process	ALDH5A1/HAGH/GSTZ1/IDH1/GSTA1/GCLC/MMACHC/GSTA4/MGST2/SOD1/GSTA2/GGT1/GPX1
liver	blue	BP	GO:0008286	insulin receptor signaling pathway	IRS1/GPLD1/NUCKS1/ENPP1/PIK3R1/PDK2/SORL1/GSK3B/PDK4/SESN3/EIF4EBP2/AHSG/ATP6V0A1/ATP6V1B1/INSR/CISH/SH2B2/CCND3/BCAR1/ATP6V0B/TCIRG1/SOCS1/RHOQ/SHC1
liver	blue	BP	GO:0006555	methionine metabolic process	BHMT2/ADI1/BHMT/MAT1A/AHCYL2/AHCY/MTHFR
liver	blue	BP	GO:0033559	unsaturated fatty acid metabolic process	ACOX1/CYP4F2/CYP2C9/EPHX2/SCP2/CYP2C18/CYP2J2/GSTA1/CBR1/AKR1C4/HPGD/ELOVL2/CYP1A2/ACSL1/CYP2E1/CYP2A13/CYP2U1/PRXL2B/ATP6V1B1/TNFRSF1A
liver	blue	BP	GO:0071542	dopaminergic neuron differentiation	GSK3B/CDNF/LRP6/WNT5A/RSPO2/FOXA2/RYK/VEGFA/WNT3/CSNK1D
liver	blue	BP	GO:0030647	aminoglycoside antibiotic metabolic process	CBR4/SLC34A1/AKR1A1/AKR1C4/AKR7A2
liver	blue	BP	GO:0018958	phenol-containing compound metabolic process	IYD/DAO/DDC/MAOB/PAH/RAPGEF2/PMEL/SRD5A1/FAH/ABAT/DIO1/CYP2E1/WNT5A/COMT/DDT/MC1R/DUOX2/DIO3/GIPC1
liver	blue	BP	GO:0006525	arginine metabolic process	ART4/OTC/FAH/DDAH1/ASS1/OAT/ATP2B4
liver	blue	BP	GO:0045017	glycerolipid biosynthetic process	CRLS1/PCK2/PI4K2B/AGMO/RGN/ETNK2/GPLD1/PIGV/THRSP/PIK3R1/MTM1/DGAT2/GPAM/AGPAT3/PIK3C2G/PLD1/PIGN/CEPT1/ACSL1/GNPAT/ETNPPL/CWH43/PNPLA3/SIK1/PLEKHA4/INPP4A/INPP5J/CPNE7/SCARB1/CDIPT/PIP5K1C/DGKZ/PGS1/NR1H2/PITPNM1/LPCAT1
liver	blue	BP	GO:0034310	primary alcohol catabolic process	SULT1E1/HAO1/ALDH1B1/ALDH2/SULT2A1/ADH7
liver	blue	BP	GO:0008210	estrogen metabolic process	SULT1E1/CYP2C9/HSD17B8/CYP1A2/CYP3A4/UGT2B11/SGPL1/COMT/HSD3B1
liver	blue	BP	GO:0042573	retinoic acid metabolic process	ADH6/ADH1B/ADH1C/ALDH8A1/CYP2C18/CYP3A4/ADH7/UGT1A7/CRABP2
liver	blue	BP	GO:0070207	protein homotrimerization	OTC/CLYBL/P2RX3/SIGMAR1/SCARA5/TRPM8/DISP1/TMEM38A/MLKL
liver	blue	BP	GO:0032874	positive regulation of stress-activated MAPK cascade	KLHDC10/XDH/TLR3/DUSP19/ARL6IP5/FZD5/TNFRSF19/WNT5A/EDAR/MAPK8IP1/SPAG9/NRK/SAMD5/UNC5CL/MAPK8IP2/VEGFA/SEMA4C/MAP3K3/RELL2/MAP3K9/TRAF4/PRMT1/DAXX/AXIN1/NOD2/MLKL/LTBR
liver	blue	BP	GO:0070304	positive regulation of stress-activated protein kinase signaling cascade	KLHDC10/XDH/TLR3/DUSP19/ARL6IP5/FZD5/TNFRSF19/WNT5A/EDAR/MAPK8IP1/SPAG9/NRK/SAMD5/UNC5CL/MAPK8IP2/VEGFA/SEMA4C/MAP3K3/RELL2/MAP3K9/TRAF4/PRMT1/DAXX/AXIN1/NOD2/MLKL/LTBR
liver	blue	BP	GO:0009072	aromatic amino acid family metabolic process	AADAT/IYD/HNMT/PAH/GSTZ1/QDPR/GCDH/FAH/KMO/IL4I1
liver	blue	BP	GO:0042402	cellular biogenic amine catabolic process	DMGDH/AADAT/HNMT/ALDH7A1/SARDH/BHMT/KMO
liver	blue	BP	GO:0006558	L-phenylalanine metabolic process	PAH/GSTZ1/QDPR/FAH/IL4I1
liver	blue	BP	GO:0006559	L-phenylalanine catabolic process	PAH/GSTZ1/QDPR/FAH/IL4I1
liver	blue	BP	GO:0006702	androgen biosynthetic process	SRD5A2/HSD17B6/SRD5A1/HSD3B1/SCARB1
liver	blue	BP	GO:0046689	response to mercury ion	ALAD/SLC34A1/AQP9/ABCC2/BSG
liver	blue	BP	GO:0061314	Notch signaling involved in heart development	GALNT11/HEY2/SNAI2/NOTCH2/HEY1
liver	blue	BP	GO:1902221	erythrose 4-phosphate/phosphoenolpyruvate family amino acid metabolic process	PAH/GSTZ1/QDPR/FAH/IL4I1
liver	blue	BP	GO:1902222	erythrose 4-phosphate/phosphoenolpyruvate family amino acid catabolic process	PAH/GSTZ1/QDPR/FAH/IL4I1
liver	blue	BP	GO:0006206	pyrimidine nucleobase metabolic process	DPYD/DPYS/ALDH6A1/CTPS2/CTPS1/TYMP
liver	blue	BP	GO:0043252	sodium-independent organic anion transport	SLC16A2/SLC22A9/SLCO1B1/SLCO1B3/SLCO4C1/SLCO1B7
liver	blue	BP	GO:0031667	response to nutrient levels	ALAD/CAT/SORD/AGL/BCHE/PCK2/TMBIM6/PKLR/PON1/BCKDHB/OTC/TRIM24/LRRK2/TTPA/NNT/PDK2/SLC34A1/TMEM135/GCLC/SORL1/SRD5A1/PDK4/ACACB/SOD1/P2RX3/SESN3/BRIP1/TBC1D5/ACSL1/GNPAT/AHCY/SSTR1/MIOS/USP33/ASS1/COMT/SNAI2/ULK2/PROX1/PSPH/FAS/FOXA2/GLUL/PDXP/BMPR2/SIK1/FGF23/NUAK2/P2RX4/GIPR/ALPL/GABARAP/MTHFR/EPO/TSPO/TRPM4/ASNS/WDR45/PIM1/NOD2/ICAM1
liver	blue	BP	GO:0008206	bile acid metabolic process	AMACR/AKR1D1/ACOX2/CYP39A1/SCP2/AKR1C4/CYP7A1/BAAT/SULT2A1/PROX1/OSBPL6
liver	blue	BP	GO:0044262	cellular carbohydrate metabolic process	SORD/AGL/GBA3/GYS2/PCK2/IRS1/GNE/IDH1/KAT2B/RGN/GPLD1/ENPP1/PDK2/XYLB/DGAT2/COX11/ANGPTL3/PYGL/PGM1/GSK3B/PDK4/CBFA2T3/ACACB/MLYCD/UGP2/GCK/GALK1/GANC/FBP1/TREH/INPP5A/FOXA2/PHKA2/SIK1/INSR/MECP2/INPP5J/PHKG1/MIDN
liver	blue	BP	GO:0051403	stress-activated MAPK cascade	PHLPP1/KLHDC10/NBR1/XDH/TLR3/TAB3/DUSP19/TAB2/MARVELD3/ARL6IP5/FZD5/TNFRSF19/WNT5A/EDAR/MAPK8IP1/SPAG9/FAS/NRK/SAMD5/SH2D3A/CCM2/UNC5CL/MAPK8IP2/IRAK4/MAPK11/VEGFA/SEMA4C/MAP3K3/RELL2/MAP3K9/TRAF4/PRMT1/DAXX/AXIN1/NOD2/MLKL/LTBR/MAPKAPK2/TNIP2
liver	blue	BP	GO:0006536	glutamate metabolic process	ALDH5A1/AADAT/GOT2/GCLC/GLUD1/GGT1/OAT/GLUL/FPGS
liver	blue	BP	GO:0032892	positive regulation of organic acid transport	SLC6A1/CYP4F2/ARL6IP1/ABAT/MAP2K6/ACE2/KMO/P2RX4/STXBP1
liver	blue	BP	GO:0022900	electron transport chain	DMGDH/ALDH5A1/SLC25A13/ADH5/MAOB/QDPR/ETFRF1/SDHC/XDH/AKR1A1/COX11/AKR1C4/HSD17B6/SRD5A1/ALDH2/SURF1/AKR7A2/CYP1A2/GLRX5/NQO2/AKR7A3/COX7A2L/IMMP2L/GLDC/MECP2/NOX4/DHDH/C15orf48
liver	blue	CC	GO:0044438	microbody part	ACBD5/CAT/PECR/AMACR/EHHADH/GRHPR/ECI2/ACOX2/DAO/ACOX1/ALDH3A2/HAO1/CROT/IDH1/PXMP2/DHRS4/EPHX2/SCP2/HAO2/PIPOX/PHYH/TMEM135/PXMP4/PEX11B/MLYCD/ABCD3/ACSL6/BAAT/DDO/ACSL1/GNPAT/PEX10/ECH1/MPV17L/MPV17
liver	blue	CC	GO:0044439	peroxisomal part	ACBD5/CAT/PECR/AMACR/EHHADH/GRHPR/ECI2/ACOX2/DAO/ACOX1/ALDH3A2/HAO1/CROT/IDH1/PXMP2/DHRS4/EPHX2/SCP2/HAO2/PIPOX/PHYH/TMEM135/PXMP4/PEX11B/MLYCD/ABCD3/ACSL6/BAAT/DDO/ACSL1/GNPAT/PEX10/ECH1/MPV17L/MPV17
liver	blue	CC	GO:0005777	peroxisome	ACBD5/CAT/PECR/AMACR/EHHADH/GRHPR/ECI2/ACOX2/DAO/ACOX1/ALDH3A2/HAO1/CROT/IDH1/PXMP2/DHRS4/EPHX2/SCP2/HAO2/XDH/PIPOX/PHYH/TMEM135/PXMP4/PEX11B/SOD1/MLYCD/ABCD3/ACSL6/BAAT/HSDL2/DDO/ACSL1/GNPAT/PEX10/ECH1/MPV17L/MARF1/MPV17
liver	blue	CC	GO:0042579	microbody	ACBD5/CAT/PECR/AMACR/EHHADH/GRHPR/ECI2/ACOX2/DAO/ACOX1/ALDH3A2/HAO1/CROT/IDH1/PXMP2/DHRS4/EPHX2/SCP2/HAO2/XDH/PIPOX/PHYH/TMEM135/PXMP4/PEX11B/SOD1/MLYCD/ABCD3/ACSL6/BAAT/HSDL2/DDO/ACSL1/GNPAT/PEX10/ECH1/MPV17L/MARF1/MPV17
liver	blue	CC	GO:0005782	peroxisomal matrix	CAT/AMACR/EHHADH/GRHPR/ECI2/ACOX2/DAO/ACOX1/HAO1/CROT/IDH1/DHRS4/EPHX2/SCP2/HAO2/PIPOX/PHYH/MLYCD/ABCD3/BAAT/DDO/GNPAT/ECH1
liver	blue	CC	GO:0031907	microbody lumen	CAT/AMACR/EHHADH/GRHPR/ECI2/ACOX2/DAO/ACOX1/HAO1/CROT/IDH1/DHRS4/EPHX2/SCP2/HAO2/PIPOX/PHYH/MLYCD/ABCD3/BAAT/DDO/GNPAT/ECH1
liver	blue	CC	GO:0005759	mitochondrial matrix	DHTKD1/MMUT/DMGDH/ALDH5A1/AADAT/AK4/GLYAT/HADH/ETFBKMT/PCK2/ACADL/CBR4/BCKDHB/HOGA1/HAGH/ALDH7A1/GSTZ1/ALDH1B1/SARDH/ACADSB/OTC/DNAJC19/DBT/HIBADH/NADK2/HMGCS2/GOT2/LRRK2/ACSM5/ALDH6A1/ACADM/PDK2/NUBPL/ACSM3/HSD17B8/GCDH/HIBCH/GLUD1/COQ5/AK3/PRDX3/MCCC2/ALDH2/LIPT2/ABAT/PDK4/SUCLG2/GLRX5/PDSS2/SOD1/MLYCD/TARS2/MCEE/FAHD1/TFB1M/NMNAT3/HSD17B10/ETNPPL/PPTC7/GLDC/OAT/NAXD/MRRF/PC/FPGS/GPX1/PHYKPL/AD…
liver	blue	CC	GO:0005778	peroxisomal membrane	ACBD5/CAT/PECR/DAO/ACOX1/ALDH3A2/PXMP2/DHRS4/TMEM135/PXMP4/PEX11B/ABCD3/ACSL6/ACSL1/GNPAT/PEX10/MPV17L/MPV17
liver	blue	CC	GO:0031903	microbody membrane	ACBD5/CAT/PECR/DAO/ACOX1/ALDH3A2/PXMP2/DHRS4/TMEM135/PXMP4/PEX11B/ABCD3/ACSL6/ACSL1/GNPAT/PEX10/MPV17L/MPV17
liver	blue	CC	GO:0016323	basolateral plasma membrane	SLC10A1/MTTP/SLC22A9/CDH2/ENPP1/SLCO1B1/SLCO1B3/SLC26A1/HPGD/TF/SLC22A1/SLCO4C1/SLC40A1/DLG2/ATP7B/AQP9/SLC4A4/SLC16A10/MET/SLC19A1/DISP1/BMPR2/ATP6V1B1/ST14/SLC4A11/SLC9A1/NKD2/NOD2/FLOT2/C5AR1/BEST1/ATP2B4/MSN/FLOT1
liver	blue	MF	GO:0050662	coenzyme binding	ACBD5/DHTKD1/CAT/SORD/FMO5/GRHPR/FMO3/AADAT/ECI2/ACOX2/IYD/DHFR/DAO/FMO4/HADH/ADH4/ACOX1/ACADL/DDC/MAOB/HAO1/CBR4/DPYD/IDH1/ALDH1B1/QDPR/BDH2/ACADSB/PANK1/TPMT/DBT/HIBADH/SCP2/HAO2/CRYL1/GOT2/ALDH6A1/ACADM/XDH/NNT/PHYH/HSD17B8/GCDH/GCLC/MMACHC/HPGD/GLUD1/PYGL/FOXRED2/ALDH1A1/SRD5A1/ALDH2/ABAT/MARC1/ACACB/SPTLC3/SGPL1/DDO/NQO2/CRYZL1/FASN/AHCY/DBI/ETNPPL/KMO/PNPLA3/GLDC/LBR/OAT/PC/NOX4/MTHFR/PHYKP…
liver	blue	MF	GO:0016614	oxidoreductase activity, acting on CH-OH group of donors	ADH6/SORD/EHHADH/GRHPR/AKR1D1/ADH1B/ADH5/HADH/ADH4/ALDH3A2/ADH1C/HAO1/CBR4/IDH1/L2HGDH/DHRS4/BDH2/HIBADH/SRD5A2/HAO2/CRYL1/HSD17B8/CBR1/AKR1A1/AKR1C4/HPGD/HSD17B6/AKR7A2/AKR7A3/FASN/HSD17B10/ADH7/RDH12/HSD3B1/PRXL2B/DHDH
liver	blue	MF	GO:0016616	oxidoreductase activity, acting on the CH-OH group of donors, NAD or NADP as acceptor	ADH6/SORD/EHHADH/GRHPR/AKR1D1/ADH1B/ADH5/HADH/ADH4/ADH1C/CBR4/IDH1/DHRS4/BDH2/HIBADH/SRD5A2/CRYL1/HSD17B8/CBR1/AKR1A1/AKR1C4/HPGD/HSD17B6/AKR7A2/AKR7A3/FASN/HSD17B10/ADH7/RDH12/HSD3B1/PRXL2B/DHDH
liver	blue	MF	GO:0016903	oxidoreductase activity, acting on the aldehyde or oxo group of donors	DHTKD1/ALDH5A1/ADH5/ADH4/ALDH3A2/ALDH9A1/BCKDHB/ALDH7A1/ALDH1B1/ALDH8A1/ALDH6A1/ALDH1L1/AKR1C4/ALDH1A1/ALDH2/ADH7
liver	blue	MF	GO:0051287	NAD binding	SORD/GRHPR/HADH/ADH4/IDH1/ALDH1B1/QDPR/BDH2/HIBADH/CRYL1/NNT/HSD17B8/HPGD/GLUD1/ALDH1A1/ALDH2/AHCY/CYB5R3
liver	blue	MF	GO:0050661	NADP binding	CAT/FMO5/GRHPR/FMO3/DHFR/FMO4/CBR4/DPYD/IDH1/QDPR/HIBADH/NNT/SRD5A1/CRYZL1/FASN/LBR/MTHFR
liver	blue	MF	GO:0050660	flavin adenine dinucleotide binding	FMO5/FMO3/ACOX2/DAO/FMO4/ACOX1/ACADL/MAOB/DPYD/ACADSB/ACADM/XDH/GCDH/MMACHC/FOXRED2/DDO/NQO2/KMO/NOX4/MTHFR/CYB5R3
liver	blue	MF	GO:0016620	oxidoreductase activity, acting on the aldehyde or oxo group of donors, NAD or NADP as acceptor	ALDH5A1/ADH5/ADH4/ALDH3A2/ALDH9A1/ALDH7A1/ALDH1B1/ALDH8A1/ALDH6A1/ALDH1L1/AKR1C4/ALDH1A1/ALDH2
liver	blue	MF	GO:0019842	vitamin binding	DHTKD1/MMUT/AADAT/DHFR/ADH4/SEC14L2/DDC/GOT2/TTPA/PHYH/FTCDNL1/MMACHC/PYGL/RBP4/ABAT/MARC1/ACACB/SPTLC3/SGPL1/FASN/ETNPPL/ADH7/SLC19A1/GLDC/OAT/CRABP2/PC/PHYKPL/PDXK
liver	blue	MF	GO:0005342	organic acid transmembrane transporter activity	SLC6A1/SLC25A13/SLC16A2/SLC38A11/SLC10A1/SLC22A9/SLC6A12/SFXN1/SLCO1B1/SLCO1B3/SLC26A1/AKR1C4/SLC38A4/SLC7A9/AQP9/SLCO1B7/SLC16A4/SLC17A1/SLC13A2/SLC35A5/SLC16A13/SLC16A10/SLC3A1/SLC16A12/ABCC2/SLC19A1/SLC16A11/SLC26A8/SLC13A5/SLC7A5/SLC38A5
liver	blue	MF	GO:0046943	carboxylic acid transmembrane transporter activity	SLC6A1/SLC25A13/SLC16A2/SLC38A11/SLC10A1/SLC22A9/SLC6A12/SFXN1/SLCO1B1/SLCO1B3/SLC26A1/AKR1C4/SLC38A4/SLC7A9/AQP9/SLCO1B7/SLC16A4/SLC17A1/SLC13A2/SLC35A5/SLC16A13/SLC16A10/SLC3A1/SLC16A12/ABCC2/SLC19A1/SLC16A11/SLC26A8/SLC13A5/SLC7A5/SLC38A5
liver	blue	MF	GO:0015291	secondary active transmembrane transporter activity	SLC6A1/CLCN5/SLC16A2/SLC47A1/SLC10A1/SLC10A5/SLC22A9/SLC6A12/SLCO1B1/SLCO1B3/SLC34A1/SLC26A1/SLC35D1/SLC22A1/SLCO4C1/SLC38A4/SLC20A2/SLCO1B7/SLC16A4/SLC17A1/SLC4A4/SLC13A2/SLC16A13/SLC2A12/SLC16A10/SLC16A12/SLC19A1/SLC16A11/ANKH/SLC4A3/SLC26A8/SLC12A4/SLC13A5/SLC45A1/SLC28A3/SLC4A11/MFSD12/SLC9A1/SLC8B1/SLC10A3/SLC35C1/SLC5A6
liver	blue	MF	GO:0004497	monooxygenase activity	FMO5/FMO3/AKR1D1/CYP39A1/FAXDC2/FMO4/PAH/AGMO/CYP4F2/CYP2C9/CYP2C18/CYP2J2/CYP3A43/AKR1C4/CYP1A2/CYP3A4/CYP7A1/CYP2E1/NLRP11/CYP2A13/KMO/CYP2U1/CYP21A2
liver	blue	MF	GO:0004029	aldehyde dehydrogenase (NAD) activity	ADH5/ALDH3A2/ALDH9A1/ALDH7A1/ALDH1B1/ALDH1L1/ALDH1A1/ALDH2
liver	blue	MF	GO:0008514	organic anion transmembrane transporter activity	SLC6A1/SLC25A13/SLC2A2/SLC16A2/SLC38A11/SLC10A1/SLC22A9/SLC6A12/TMEM30B/SFXN1/SLCO1B1/SLC35A3/SLCO1B3/SLC26A1/SLC35D1/AKR1C4/SLCO4C1/SLC38A4/SLC7A9/AQP9/SLCO1B7/SLC16A4/SLC17A1/SLC4A4/SLC13A2/SLC35A5/SLC16A13/SLC16A10/SLC3A1/SLC16A12/ABCC2/SLC19A1/SLC16A11/SLC26A8/SLC13A5/SLC7A5/SLC4A11/SLC38A5
liver	blue	MF	GO:0032947	protein-containing complex scaffold activity	HOMER2/LRRK2/DUSP19/MAPK8IP1/MAGI2/SPAG9/MMS19/MAPK8IP2/NUP62/CARD10/KSR1
liver	blue	MF	GO:0022804	active transmembrane transporter activity	PCYOX1/SLC6A1/CLCN5/SLC16A2/SLC47A1/SLC10A1/SLC10A5/ABCA6/SLC22A9/SLC6A12/ABCG2/SLCO1B1/SLCO1B3/SLC34A1/SLC26A1/SLC35D1/SLC22A1/SLCO4C1/SLC38A4/ATP7B/SLC20A2/ABCC9/SLCO1B7/ABCD3/SLC16A4/SLC17A1/SLC4A4/SLC13A2/SLC16A13/SLC2A12/SLC16A10/SLC16A12/ABCC2/SLC19A1/SLC16A11/ANKH/ATP6V0A1/SLC4A3/TIMM17B/SLC26A8/SLC12A4/SLC13A5/ATP2C2/SLC45A1/SLC28A3/SLC4A11/MFSD12/SLC9A1/TAP1/SLC8B1/SLC10A3/ATP6V0B/SLC35C…
liver	blue	MF	GO:0016627	oxidoreductase activity, acting on the CH-CH group of donors	PECR/AKR1D1/ACOX2/ACOX1/ACADL/DPYD/BDH2/ACADSB/SRD5A2/ACADM/SDHC/GCDH/SRD5A1/FASN/LBR/DHDH
liver	blue	MF	GO:0008395	steroid hydroxylase activity	CYP39A1/CYP2C9/CYP2C18/CYP2J2/CYP3A43/CYP1A2/CYP3A4/CYP7A1/CYP2E1/CYP2A13/CYP2U1/CYP21A2
liver	blue	MF	GO:0008509	anion transmembrane transporter activity	PCYOX1/SLC6A1/CLCN5/SLC25A13/SLC2A2/SLC16A2/SLC38A11/SLC10A1/SLC22A9/SLC6A12/TMEM30B/SFXN1/SLCO1B1/SLC35A3/SLCO1B3/SLC34A1/ANO1/ANO6/SLC26A1/SLC35D1/AKR1C4/SLC22A1/SLCO4C1/SLC38A4/SLC7A9/AQP9/SLCO1B7/SLC16A4/SLC17A1/SLC4A4/SLC13A2/SLC35A5/SLC16A13/SLC16A10/SLC3A1/SLC16A12/ABCC2/SLC19A1/AQP6/SLC16A11/ANKH/SLC4A3/SLC26A8/SLC12A4/SLC13A5/SLC7A5/SLC4A11/SLC38A5/GABRR2/BEST1
liver	blue	MF	GO:0016863	intramolecular oxidoreductase activity, transposing C=C bonds	EHHADH/ECI2/GSTA1/EBPL/ECH1/DDT/HSD3B1
liver	blue	MF	GO:0016705	oxidoreductase activity, acting on paired donors, with incorporation or reduction of molecular oxygen	FMO5/FMO3/AKR1D1/CYP39A1/FAXDC2/BBOX1/FMO4/PAH/AGMO/CYP4F2/CYP2C9/CYP2C18/CYP2J2/PHYH/CYP3A43/AKR1C4/SC5D/CYP1A2/CYP3A4/CYP7A1/KDM4A/CYP2E1/NLRP11/CYP2A13/KMO/CYP2U1/TRMT9B/JMJD6/CYP21A2
liver	blue	MF	GO:0009055	electron transfer activity	DMGDH/ADH5/MAOB/QDPR/SDHC/XDH/AKR1A1/COX11/AKR1C4/HSD17B6/SRD5A1/ALDH2/SURF1/AKR7A2/CYP1A2/GLRX5/NQO2/AKR7A3/COX7A2L/GLDC/NOX4/DHDH/C15orf48
liver	blue	MF	GO:0070402	NADPH binding	GRHPR/DHFR/CBR4/QDPR/SRD5A1/FASN/LBR
liver	blue	MF	GO:0016628	oxidoreductase activity, acting on the CH-CH group of donors, NAD or NADP as acceptor	PECR/AKR1D1/DPYD/BDH2/SRD5A2/SRD5A1/FASN/LBR/DHDH
liver	blue	MF	GO:0071949	FAD binding	ACOX2/DAO/ACOX1/XDH/MMACHC/DDO/NQO2/KMO/MTHFR/CYB5R3
liver	blue	MF	GO:0008028	monocarboxylic acid transmembrane transporter activity	SLC6A1/SLC16A2/SLC10A1/SLC22A9/SLC6A12/SLCO1B1/SLCO1B3/AKR1C4/SLCO1B7/SLC16A4/SLC16A13/SLC16A12/SLC16A11
liver	blue	MF	GO:0033218	amide binding	ACBD5/MME/ECI2/BCHE/DHFR/FOLH1/ACADL/PGRMC1/BACE1/PANK1/SCP2/GHR/PIK3R1/ALDH6A1/GCDH/FTCDNL1/MMACHC/SORL1/SLC40A1/SRD5A1/SLC7A9/APBB2/ACACB/APBA1/PTGDR2/NQO2/FASN/GRIN2B/SSTR1/FZD5/ITM2B/DBI/SLC19A1/GLP2R/PNPLA3/TRHDE/LVRN/PC/INSR/MAPK8IP2/BDKRB1/SLC7A5/GIPR/APBA3/GPR37L1/TAP1/SCARB1/NOD2/CLTB/HLA-E/LBP
liver	blue	MF	GO:0031406	carboxylic acid binding	GRHPR/ACOX2/DHFR/ADH5/ACOX1/DDC/DPYS/OTC/DBT/SCP2/GOT2/SERPINA5/PHYH/GCLC/FTCDNL1/GLUD1/PYGL/ACACB/SESN3/DDAH1/UBR2/GRIN2B/SLC19A1/ASS1/GLDC/GPR143/GLUL/UGT1A7/FFAR4/CRABP2/PC/HAPLN3
liver	blue	MF	GO:0000062	fatty-acyl-CoA binding	ACBD5/ECI2/ACADL/SCP2/ALDH6A1/GCDH/DBI/PNPLA3
liver	blue	MF	GO:0016725	oxidoreductase activity, acting on CH or CH2 groups	ACOX2/CYP2C9/XDH/CYP3A43/CYP1A2/CYP3A4
liver	blue	MF	GO:0016597	amino acid binding	DDC/DPYS/OTC/GOT2/GCLC/GLUD1/SESN3/DDAH1/UBR2/GRIN2B/ASS1/GLDC/GPR143/GLUL
liver	blue	MF	GO:0030170	pyridoxal phosphate binding	AADAT/DDC/GOT2/PYGL/ABAT/MARC1/SPTLC3/SGPL1/ETNPPL/GLDC/OAT/PHYKPL/PDXK
liver	blue	MF	GO:0070279	vitamin B6 binding	AADAT/DDC/GOT2/PYGL/ABAT/MARC1/SPTLC3/SGPL1/ETNPPL/GLDC/OAT/PHYKPL/PDXK
liver	blue	MF	GO:0015293	symporter activity	SLC6A1/SLC16A2/SLC10A1/SLC10A5/SLC6A12/SLC34A1/SLC22A1/SLC38A4/SLC20A2/SLC16A4/SLC17A1/SLC4A4/SLC13A2/SLC16A13/SLC2A12/SLC16A12/SLC16A11/SLC12A4/SLC13A5/SLC45A1/SLC28A3/SLC4A11/MFSD12/SLC10A3/SLC5A6
liver	blue	MF	GO:0043177	organic acid binding	GRHPR/ACOX2/DHFR/ADH5/ACOX1/DDC/DPYS/OTC/DBT/SCP2/GOT2/SERPINA5/PHYH/GCLC/FTCDNL1/GLUD1/PYGL/ACACB/SESN3/DDAH1/UBR2/GRIN2B/SLC19A1/ASS1/GLDC/GPR143/GLUL/UGT1A7/FFAR4/CRABP2/PC/HAPLN3
liver	blue	MF	GO:0004745	retinol dehydrogenase activity	ADH6/ADH1B/ADH4/ADH1C/HSD17B6/ADH7/RDH12
liver	blue	MF	GO:1901681	sulfur compound binding	ACBD5/DHTKD1/ECI2/ECM2/ACADL/KNG1/PANK1/TPMT/DBT/SCP2/ENPP1/SEMA5A/ALDH6A1/SERPINA5/SERPIND1/GCDH/MMACHC/ANGPTL3/ACACB/HRG/LIPC/LPA/FBLN7/CCN6/DBI/PCOLCE2/PNPLA3/FGFRL1/RSPO2/ANXA4/VTN/PTCH1/PC/VEGFA/PDCD5/SAA1/PRMT1
liver	blue	MF	GO:0016712	oxidoreductase activity, acting on paired donors, with incorporation or reduction of molecular oxygen, reduced flavin or flavoprotein as one donor, and incorporation of one atom of oxygen	CYP2C9/CYP2C18/CYP2J2/CYP3A43/CYP1A2/CYP3A4/CYP2E1/CYP2A13/CYP2U1
liver	blue	MF	GO:0005496	steroid binding	AKR1D1/GRAMD1C/AR/SULT1E1/NR3C2/PGRMC1/PGRMC2/ESR1/SCP2/ERLIN2/CYP3A4/PAQR9/OSBPL6/PTCH1/TSPO/ESR2/CYP21A2/GRAMD1A
liver	blue	MF	GO:0015643	toxic substance binding	EPHX2/DSG1/ASS1/GUCY2C/A4GALT
liver	blue	MF	GO:0016801	hydrolase activity, acting on ether bonds	EPHX2/AKR7A2/EPHX1/RNPEP/AHCY
liver	blue	MF	GO:0016709	oxidoreductase activity, acting on paired donors, with incorporation or reduction of molecular oxygen, NAD(P)H as one donor, and incorporation of one atom of oxygen	FMO5/FMO3/AKR1D1/FAXDC2/FMO4/CYP4F2/AKR1C4/CYP7A1/CYP2E1/KMO
liver	blue	MF	GO:0015020	glucuronosyltransferase activity	UGT2B7/UGT2B15/UGT2A3/UGT2B11/B3GAT1/UGT2B28/UGT1A7/CHPF/B3GAT3
liver	blue	MF	GO:0008392	arachidonic acid epoxygenase activity	CYP4F2/CYP2C9/CYP2C18/CYP2J2/CYP2E1/CYP2A13
liver	blue	MF	GO:0016645	oxidoreductase activity, acting on the CH-NH group of donors	DMGDH/DHFR/SARDH/QDPR/ALDH1L1/PIPOX/MTHFR/PYCR2
liver	blue	MF	GO:1901567	fatty acid derivative binding	ACBD5/ECI2/ACADL/SCP2/ALDH6A1/GCDH/DBI/PNPLA3
liver	turquoise	BP	GO:0044282	small molecule catabolic process	GLYCTK/AMT/CYP4F12/ASPA/HAAO/BDH1/FTCD/CYP4A11/DCXR/LDHD/CYP27A1/PRODH2/UROC1/IVD/AGXT/ACAA1/ENTPD8/GPT/IDNK/ACAD10/HMGCL/GCAT/SULT1A2/ALDOB/ECHS1/CSAD/ABHD1/RIDA/SCLY/PLA2G15/CYP46A1/ACADS/TKFC/CYP4F3/ABHD10/SULT1A1/TST/AFMID/AKT2/PCBD1/ACAD11/IDO2/BCAT2/HPD/ENO3/INPP5B/CDO1/THNSL2/GALE/ECI1/ENOSF1/APOE/KHK/CYP1A1/ACAD8/CBS/ENTPD2/PTEN/HYAL1/PPM1K/PFKL/ACOT8/FABP1/CDA/SESN2/CYP26C1/SYNJ2/HDC/SHM…
liver	turquoise	BP	GO:0015711	organic anion transport	SLC22A25/SFXN5/SLC38A3/SLC6A13/SLC17A4/CYP4A11/AGXT/SLC25A10/SLCO2B1/CA14/SLC23A1/PCTP/APOC1/STARD10/SLC25A42/ABCG8/SLC25A23/APOC3/SLC17A3/SLC46A1/AKT2/SLC25A1/SLC35A1/SLCO1A2/APOA1/APOC2/SPX/APOE/APOA5/NFE2L1/SLC25A18/SLC27A3/SLC25A38/SLC16A8/CA5A/SLC5A12/PITPNM2/APOA2/GLTPD2/PRKAG2/SLC25A22/SLC25A11/DRD4/SLC66A2/FABP1/P2RX7/SLC2A8/ATP10B/ATP8B4/PITPNC1/ATP8B3/SFXN4/SLC6A20/SLC51B/ATP9A/PLEKHA8/…
liver	turquoise	BP	GO:0006631	fatty acid metabolic process	CYP4F12/CYP4A11/IVD/ACSM2A/ACAA1/ACAD10/ACSM2B/ACSF2/CYP2C8/CYP4V2/PTGR2/ECHS1/ABHD1/APOC1/SLC45A3/CYP2A6/PLA2G15/ZADH2/ACADS/CYP4F3/APOC3/GSTM4/GPX4/CYP2C19/PDP2/AKT2/GSTM2/ACOT12/ACAD11/CYGB/CYP2A7/LIPG/THNSL2/FADS6/CYP2G1P/ECI1/SCAP/APOC2/SIRT4/CYP2B6/CYP1A1/APOA5/NFE2L1/TREX1/LOC344967/ACSM1/TH/SLC27A3/ACOT6/PRKAG2/SREBF1/ACOT8/FABP1/SESN2/XBP1/POR/ALOX15B/MAPK14/ACSBG1/OLAH/PON2/CEACAM1/APPL…
liver	turquoise	BP	GO:0015914	phospholipid transport	PCTP/APOC1/STARD10/ABCG8/APOC3/APOA1/APOC2/APOE/APOA5/PITPNM2/APOA2/GLTPD2/SLC66A2/P2RX7/ATP10B/ATP8B4/PITPNC1/ATP8B3/ATP9A/PLEKHA8/ATP10D/APOA4/PRELID1/GLTP/TNFAIP8L3
liver	turquoise	BP	GO:0015748	organophosphate ester transport	PCTP/APOC1/STARD10/SLC25A42/ABCG8/SLC25A23/APOC3/SLC17A3/APOA1/APOC2/APOE/APOA5/PITPNM2/APOA2/GLTPD2/SLC66A2/P2RX7/ATP10B/ATP8B4/PITPNC1/ATP8B3/SLC25A33/ATP9A/PLEKHA8/ATP10D/APOA4/PRELID1/GLTP/SLC37A1/SLC25A19/TNFAIP8L3
liver	turquoise	BP	GO:0016054	organic acid catabolic process	AMT/CYP4F12/ASPA/HAAO/FTCD/CYP4A11/DCXR/LDHD/PRODH2/UROC1/IVD/AGXT/ACAA1/GPT/IDNK/ACAD10/HMGCL/GCAT/ECHS1/CSAD/ABHD1/RIDA/SCLY/PLA2G15/ACADS/CYP4F3/ABHD10/TST/AFMID/AKT2/PCBD1/ACAD11/IDO2/BCAT2/HPD/CDO1/THNSL2/ECI1/ENOSF1/ACAD8/CBS/HYAL1/PPM1K/ACOT8/FABP1/SESN2/CYP26C1/HDC/SHMT2/ADO/AKT1/CNR1/SLC27A4/CYP26B1/GAD1/SDSL/CEMIP2/PPARD/GOT1/BCAT1/ASRGL1
liver	turquoise	BP	GO:0046395	carboxylic acid catabolic process	AMT/CYP4F12/ASPA/HAAO/FTCD/CYP4A11/DCXR/LDHD/PRODH2/UROC1/IVD/AGXT/ACAA1/GPT/IDNK/ACAD10/HMGCL/GCAT/ECHS1/CSAD/ABHD1/RIDA/SCLY/PLA2G15/ACADS/CYP4F3/ABHD10/TST/AFMID/AKT2/PCBD1/ACAD11/IDO2/BCAT2/HPD/CDO1/THNSL2/ECI1/ENOSF1/ACAD8/CBS/HYAL1/PPM1K/ACOT8/FABP1/SESN2/CYP26C1/HDC/SHMT2/ADO/AKT1/CNR1/SLC27A4/CYP26B1/GAD1/SDSL/CEMIP2/PPARD/GOT1/BCAT1/ASRGL1
liver	turquoise	BP	GO:0009063	cellular amino acid catabolic process	AMT/ASPA/HAAO/FTCD/PRODH2/UROC1/IVD/AGXT/GPT/HMGCL/GCAT/CSAD/RIDA/SCLY/TST/AFMID/PCBD1/IDO2/BCAT2/HPD/CDO1/THNSL2/ENOSF1/ACAD8/CBS/PPM1K/HDC/SHMT2/ADO/GAD1/SDSL/GOT1/BCAT1/ASRGL1
liver	turquoise	BP	GO:0031667	response to nutrient levels	SLC38A3/SIRT5/PFKFB1/SLC39A5/F7/TNRC6A/HMGCL/MGMT/ABCG8/LRP11/WDR59/OMA1/BAIAP2/APOA1/CD4/HSD11B2/LIPG/BBS4/LRAT/KANK2/PEMT/SPX/APOE/DNMT3B/FYN/P2RX6/DEPDC5/CYP1A1/RRAGB/TRPV4/PTEN/FOXA3/FOXO4/ATG14/TH/WIPI2/ZFYVE1/SESN1/OGG1/SREBF1/EIF2AK2/TNKS/P2RX7/SESN2/LRCOL1/XBP1/KCNB1/POR/ALDH1A2/MMP7/AQP3/DAP/TNC/HAMP/SLC39A4/WNT9B/RRAGC/ITGA2/APPL2/ACSL4/IL1B/AKT1/CNR1/MAP3K5/SLC27A4/CIB2/CASTOR2/CYP26B1…
liver	turquoise	BP	GO:0033157	regulation of intracellular protein transport	SMO/ATP5IF1/TENM1/OAZ2/BAG4/PDZK1/AKT2/HDAC3/MAVS/BMP4/SIRT4/CAMK1/FYN/ERBB2/NPEPPS/HSPA1L/SHH/JUP/MIEF2/SREBF1/SUFU/PAK1/XPO1/DNAJC27/KCNB1/TXN/SP100/MAPK14/SLC51B/IWS1/SH3TC2/MYO1C/TM9SF4/IL1B/ARIH2/SFN/UBE2L3/GCC2/ABLIM3/SUPT6H/NUCB1/EMD/PCM1/LCP1/STOM/TCAF2/BAG3/ECT2/NUTF2/PRNP/PTPN1
liver	turquoise	BP	GO:0009071	serine family amino acid catabolic process	AMT/AGXT/CSAD/SCLY/CDO1/THNSL2/CBS/SHMT2/SDSL
liver	turquoise	BP	GO:0030100	regulation of endocytosis	STX1B/HMGB1/APOC1/NECAB2/NUMB/APOC3/PLCG2/FMR1/PACSIN3/APOA1/BIN1/TSC2/CALM3/APOC2/ATXN2/APOE/TFR2/APOA5/PTPRJ/PTEN/LRRTM1/LDLRAP1/APOA2/NTF3/DRD4/SELE/SFTPD/PTX3/RAC1/ITSN1/PIP4P2/ITGB3/SNX33/ITGA2/APPL2/IL1B/CD151/APLN/NEDD4L/PACSIN2/SDCBP/ABL1/DNM2/F2RL1/STON2/ABL2/RAPGEF1/DYSF/CBL/BCR/SIRPA/MTMR2/CD177/CD63/BICD1/DNAJC6/ITGAV/RAB20/PTPN1
liver	turquoise	BP	GO:0033700	phospholipid efflux	APOC1/APOC3/APOA1/APOC2/APOE/APOA5/APOA2/APOA4
liver	turquoise	BP	GO:0034372	very-low-density lipoprotein particle remodeling	APOC3/APOA1/LIPG/APOC2/APOE/APOA5/APOA2/APOA4
liver	turquoise	BP	GO:1901606	alpha-amino acid catabolic process	AMT/ASPA/HAAO/FTCD/PRODH2/UROC1/IVD/AGXT/GPT/HMGCL/GCAT/CSAD/RIDA/SCLY/AFMID/PCBD1/IDO2/BCAT2/HPD/CDO1/THNSL2/ACAD8/CBS/HDC/SHMT2/GAD1/SDSL/GOT1/ASRGL1
liver	turquoise	BP	GO:0035725	sodium ion transmembrane transport	SLC17A4/HCN3/SCNN1D/SNTA1/SLC23A1/SCN8A/TPCN1/CNKSR3/SLC17A3/SCN11A/FXYD7/KLHL24/SCN9A/SCN2A/PKD2/DRD4/SCN5A/PTPN3/SCN3B/SLC8A2/WNK1/SLC20A1/SLC24A4/GPD1L/NEDD4L/DNM2/KCNK1/SLC12A2/SLC9A3R1/SLC34A2/STOM/SLC41A1/GLRX/NETO2/YWHAH
liver	turquoise	BP	GO:0006805	xenobiotic metabolic process	ACY3/ACAA1/NR1I2/RORC/ACSM2B/CYP2C8/CES3/SULT1A2/CSAD/PHGDH/AKR7L/CYP2A6/CYP46A1/SULT1A1/GSTM4/CYP2C19/GSTM2/HNF4A/AS3MT/CYP2A7/CYP3A5/CDO1/CYP2G1P/CYP3A7/CYP2B6/CYP1A1/CYP2W1/ACSM1/STAT5B/POR/CYP26B1/STAT5A
liver	turquoise	BP	GO:0030258	lipid modification	SPHK2/IVD/CYP4A22/ACAA1/ACAD10/CYP2C8/CYP4V2/ECHS1/APOC1/MTMR4/ACADS/AKT2/ACAD11/SMG1/CYGB/APOA1/CYP3A5/SOAT2/INPP5B/ECI1/CHRM5/SIRT4/APOE/CYP3A7/FAM126B/CYP1A1/APOA5/PTEN/ACSM1/APOA2/PRKAG2/ACOT8/FABP1/SESN2/SYNJ2/POR/MAPK14/B4GALNT1/PIP4P2/APPL2/AKT1/PI4KA/CNR1/DGKI/APOA4/TTC7A/INPP1/MTMR7/PPARD/MTMR2/PI4K2A
liver	turquoise	BP	GO:0006869	lipid transport	CYP4A11/SLCO2B1/ABCA8/PCTP/APOC1/STARD10/ABCG8/APOC3/ABCA10/SPNS3/APOM/AKT2/SLCO1A2/APOA1/SOAT2/LIPG/LRAT/APOC2/SPX/APOE/APOA5/NME4/SLC27A3/LDLRAP1/SHH/PITPNM2/APOA2/GLTPD2/PRKAG2/APOL3/DRD4/SLC66A2/ABCA11P/FABP1/P2RX7/GDF9/APOL6/ATP10B/ATP8B4/PITPNC1/ATP8B3/SLC51B/ATP9A/PLEKHA8/ATP10D/ITGB3/CEACAM1/HDLBP/ACSL4/IL1B/ERFE/AKT1/APOA4/PRELID1/ABCC4/ABCA3/SLC27A4/NPC1/KDM5B/VPS4A/BDKRB2/GLTP/NMB/VLDL…
liver	turquoise	BP	GO:0010876	lipid localization	CYP4A11/SLCO2B1/ABCA8/PCTP/APOC1/STARD10/ABCG8/APOC3/ABCA10/SPNS3/APOM/AKT2/DGAT1/SLCO1A2/APOA1/SOAT2/LIPG/LRAT/APOC2/SPX/APOE/APOA5/NME4/SLC27A3/LDLRAP1/SHH/PITPNM2/APOA2/GLTPD2/PRKAG2/APOL3/DRD4/SLC66A2/ABCA11P/FABP1/P2RX7/GDF9/FITM1/APOL6/ATP10B/ATP8B4/PITPNC1/ATP8B3/SLC51B/ATP9A/PLEKHA8/B4GALNT1/ATP10D/ITGB3/CEACAM1/HDLBP/ACSL4/IL1B/ERFE/AKT1/APOA4/PRELID1/ABCC4/ABCA3/SLC27A4/NPC1/KDM5B/VPS4A…
liver	turquoise	BP	GO:0006814	sodium ion transport	SLC38A3/SLC17A4/HCN3/SCNN1D/SNTA1/SLC5A9/SLC23A1/SCN8A/TPCN1/CNKSR3/SLC17A3/SCN11A/FXYD7/COMMD3/KLHL24/KLHL3/SCN9A/SCN2A/PKD2/SLC5A12/DRD4/P2RX7/SLC22A4/SCN5A/PTPN3/SCN3B/SLC8A2/WNK1/SLC20A1/AKT1/SLC24A4/SLC9B1/GPD1L/NEDD4L/DNM2/KCNK1/SLC12A2/SLC9A3R1/SLC4A7/SLC34A2/STOM/SLC41A1/SGK1/GLRX/NETO2/YWHAH/SLC38A1
liver	turquoise	BP	GO:0071496	cellular response to external stimulus	SLC38A3/SLC39A5/TNRC6A/GADD45A/WDR59/BAIAP2/KANK2/FYN/DEPDC5/RRAGB/BNIP3/CBS/FOXA3/ATG14/WIPI2/ZFYVE1/SESN1/SREBF1/EIF2AK2/TNKS/P2RX7/SESN2/CD40/XBP1/RAC1/KCNB1/MMP7/AQP3/DAP/TNC/SLC39A4/WNT9B/DCTPP1/RRAGC/ITGA2/IL1B/AKT1/MAP3K5/CIB2/CASTOR2/BCL10/ADORA2B/HNRNPA1/CLEC16A/SLC2A1/CYP27B1/TNFRSF8/HDAC4/RRAGD/CBL/SNW1/MAP1LC3B2/CDKN2B/GOT1/GLRX2/FOSL1/CDKN1A/WDR45B/CD68/VDR/BAG3/BAK1/LCN2/WIPI1/HMOX1…
liver	turquoise	BP	GO:0034384	high-density lipoprotein particle clearance	APOC3/APOM/APOA1/LIPG/APOC2/APOE/APOA2/AMN/HDLBP
liver	turquoise	BP	GO:1903533	regulation of protein targeting	ATP5IF1/BAG4/PDZK1/AKT2/SIRT4/FYN/ERBB2/NPEPPS/HSPA1L/MIEF2/SREBF1/PAK1/KCNB1/SLC51B/MYO1C/ARIH2/UBE2L3/ABLIM3/NUCB1/STOM/TCAF2/BAG3/PRNP
liver	turquoise	BP	GO:0034367	protein-containing complex remodeling	APOC1/APOC3/APOM/APOA1/LIPG/APOC2/APOE/APOA5/APOA2/GTF2E1/APOA4/PLA2G2A
liver	turquoise	BP	GO:0034370	triglyceride-rich lipoprotein particle remodeling	APOC3/APOA1/LIPG/APOC2/APOE/APOA5/APOA2/APOA4
liver	turquoise	BP	GO:0048008	platelet-derived growth factor receptor signaling pathway	F7/LRIG2/PTPRJ/PTEN/IFT20/JAK2/FER/ABL1/RAPGEF1/SLC9A3R1/MYO1E/CBL/BCR/NRP1/PTPN12/PDGFRL/PTPN2/PTPN1
liver	turquoise	BP	GO:0044782	cilium organization	NINL/TTC36/IFT46/HDAC6/ONECUT2/HAUS4/CFAP20/PKHD1/DNAH1/BBS4/CKAP5/CFAP410/SEPTIN2/FAM92A/PKD2/NPHP3/BBS9/CEP162/TEKT5/CEP72/CETN2/DNAH7/FOXJ1/GORAB/LCA5L/IFT20/IFT52/MAK/SNX10/DNAL1/TMEM67/CDKL1/ATP6V0D1/TUBA4A/RSPH9/C5orf30/B9D1/CFAP54/TUBB/NECTIN2/HAUS7/POC1A/CYLD/LRRC49/KIF3A/TUBG1/ABCC4/UBXN10/CCP110/CEP83/DNAH5/BBS7/BBS12/TEKT1/PARVA/ABLIM1/CEP97/ABLIM3/PCM1/DNM2/CATIP/ACTR1A/CFAP221/TUBB4B…
liver	turquoise	BP	GO:0034375	high-density lipoprotein particle remodeling	APOC1/APOC3/APOM/APOA1/LIPG/APOC2/APOE/APOA2/APOA4
liver	turquoise	BP	GO:0090314	positive regulation of protein targeting to membrane	PDZK1/AKT2/FYN/ERBB2/MIEF2/PAK1/KCNB1/SLC51B/MYO1C/STOM/TCAF2/PRNP
liver	turquoise	BP	GO:0035023	regulation of Rho protein signal transduction	CCDC125/FGD4/APOC3/ADRA1A/FARP2/APOA1/ARHGEF9/KANK2/APOE/SOS1/ARHGEF37/PLEKHG6/NGEF/PLEKHG3/RAC1/MCF2L2/RASGRF1/EPS8L3/PLEKHG1/ITSN1/ARHGEF38/PLEKHG4B/FARP1/ABL1/F2RL3/F2RL1/ABL2/DLC1/ARHGDIA/TRIO/BCR/NRP1/ECT2
liver	turquoise	BP	GO:0007265	Ras protein signal transduction	RAB26/RAP2C/RAC3/CCDC125/FGD4/APOC3/ADRA1A/IQSEC1/FARP2/APOA1/ARHGEF9/KANK2/RAB33B/PSD/APOE/ABI2/SOS1/PHACTR4/AUTS2/ARHGEF37/WASF1/ERAS/USP50/PLEKHG6/CELSR1/NGEF/RREB1/RAB40B/PLEKHG3/SHTN1/PSD4/RAB27B/RAC1/MCF2L2/RAB44/DNAJC27/RASGRF1/EPS8L3/KSR2/PLEKHG1/ITSN1/MAPK14/CDC42EP2/ARHGEF38/PLEKHG4B/GBF1/HACE1/JAK2/DGKI/RAP2B/RAB36/FARP1/RND3/CDK2/RB1/ABL1/DNM2/F2RL3/F2RL1/ABL2/DLC1/RAPGEF1/RAB3C/CBL/R…
liver	turquoise	BP	GO:0032386	regulation of intracellular transport	SMO/ATP5IF1/SPHK2/TENM1/STX1B/OAZ2/BAG4/DRD1/ADCY1/PDZK1/ADRA1A/FMR1/REEP6/AKT2/HDAC3/CALM3/MAVS/BMP4/SIRT4/CAMK1/FYN/HTR2A/ERBB2/NPEPPS/HSPA1L/LDLRAP1/PPP1CC/SHH/JUP/MIEF2/SREBF1/SUFU/PAK1/XPO1/DNAJC27/KCNB1/CHRNA5/TXN/SP100/MAPK14/SLC51B/IWS1/SH3TC2/MYBPC3/MYO1C/TM9SF4/NCBP2/IL1B/NCS1/GAB2/CNR1/DGKI/ARIH2/RINT1/SFN/FER/UBE2L3/GCC2/CACNA1D/ABLIM3/SUPT6H/ADORA2B/NUCB1/EMD/PCM1/LCP1/STOM/TCAF2/MTM…
liver	turquoise	BP	GO:0007266	Rho protein signal transduction	RAC3/CCDC125/FGD4/APOC3/ADRA1A/FARP2/APOA1/ARHGEF9/KANK2/APOE/SOS1/PHACTR4/ARHGEF37/PLEKHG6/CELSR1/NGEF/PLEKHG3/SHTN1/RAC1/MCF2L2/RASGRF1/EPS8L3/PLEKHG1/ITSN1/CDC42EP2/ARHGEF38/PLEKHG4B/FARP1/RND3/ABL1/F2RL3/F2RL1/ABL2/DLC1/ARHGDIA/LIMK1/TRIO/BCR/CTNNAL1/GNA12/NRP1/ECT2/CFL1
liver	turquoise	BP	GO:1901605	alpha-amino acid metabolic process	AMT/ASPA/HAAO/FTCD/PRODH2/UROC1/IVD/AGXT/GPT/HMGCL/GCAT/CSAD/PHGDH/GNMT/RIDA/SCLY/TST/AFMID/PCBD1/HNF4A/GAMT/IDO2/BCAT2/MRI1/HPD/CDO1/THNSL2/DCT/PEMT/SIRT4/NAGS/ACAD8/CBS/TH/HDC/SLC7A11/SHMT2/PFAS/GAD1/SDSL/P4HA2/PLOD3/GOT1/BCAT1/ERO1A/ASRGL1
liver	turquoise	BP	GO:0000422	autophagy of mitochondrion	ATP5IF1/HDAC6/CAMKK2/TSC2/BNIP3/ATG14/WIPI2/SREBF1/SPATA18/VPS13C/MUL1/CLEC16A/MAP1LC3B2/ATG2A/HK2/WDR45B/RNF41/FUNDC2/WIPI1/HIF1A/MAP1LC3B
liver	turquoise	BP	GO:0061726	mitochondrion disassembly	ATP5IF1/HDAC6/CAMKK2/TSC2/BNIP3/ATG14/WIPI2/SREBF1/SPATA18/VPS13C/MUL1/CLEC16A/MAP1LC3B2/ATG2A/HK2/WDR45B/RNF41/FUNDC2/WIPI1/HIF1A/MAP1LC3B
liver	turquoise	BP	GO:0065005	protein-lipid complex assembly	APOC1/APOC3/APOM/DGAT1/APOA1/SOAT2/BIN1/APOC2/APOE/APOA5/APOA2/APOA4
liver	turquoise	BP	GO:1901184	regulation of ERBB signaling pathway	ZGPAT/GPER1/MVB12B/SOS1/ERBB2/PTPRJ/EPN1/ERRFI1/PTK6/PTPN3/GPRC5A/TGFA/VPS25/SH3TC2/CEACAM1/AKT1/ITGA1/FER/CBL/GRB2/STAM/PTPN12/PTPN2/CNOT9
liver	turquoise	BP	GO:0001947	heart looping	SMO/SETDB2/BBS4/FOXH1/PKD2/NPHP3/SHH/FOXN4/IHH/SUFU/TBX3/TBX20/IFT52/STIL/BBS7/IFT57/C2CD3/HIF1A
liver	turquoise	BP	GO:0034368	protein-lipid complex remodeling	APOC1/APOC3/APOM/APOA1/LIPG/APOC2/APOE/APOA5/APOA2/APOA4/PLA2G2A
liver	turquoise	BP	GO:0034369	plasma lipoprotein particle remodeling	APOC1/APOC3/APOM/APOA1/LIPG/APOC2/APOE/APOA5/APOA2/APOA4/PLA2G2A
liver	turquoise	BP	GO:0034377	plasma lipoprotein particle assembly	APOC1/APOC3/APOM/DGAT1/APOA1/SOAT2/APOC2/APOE/APOA5/APOA2/APOA4
liver	turquoise	BP	GO:0051235	maintenance of location	LIME1/GPER1/SYNE3/SYNE1/DRD1/TPCN2/TPCN1/SLC25A23/PLCG2/PTK2B/DGAT1/GSTM2/APOA1/CD4/CHERP/BBS4/MORC3/CALM3/APOE/HTR2A/MXI1/CX3CL1/PKD2/GAA/JUP/SUFU/P2RX7/FITM1/PLCB1/SHANK1/JPH3/PSMD10/TXN/SP100/VPS13C/SCIN/B4GALNT1/ITGB3/IL1B/AKT1/SRI/CCR7/JPH1/KDELR3/MYO5A/SLC30A3/ABL1/F2RL3/KDELR1/DYSF/PPARD/TLN2/HK2/SPAG4/ERO1A/ITPR1/PTPN2/ITGAV/LCN2/FKBP1A/TLN1/ANXA5
liver	turquoise	BP	GO:0003143	embryonic heart tube morphogenesis	SMO/SETDB2/BBS4/FOXH1/PKD2/NPHP3/SHH/FOXN4/IHH/SUFU/TBX3/TBX20/IFT52/STIL/BBS7/IFT57/YAP1/C2CD3/HIF1A
liver	turquoise	BP	GO:0019373	epoxygenase P450 pathway	CYP4F12/CYP4A11/CYP2C8/CYP2A6/CYP2C19/CYP2A7/CYP2G1P/CYP2B6/CYP1A1
liver	turquoise	BP	GO:0090316	positive regulation of intracellular protein transport	SMO/TENM1/OAZ2/PDZK1/AKT2/HDAC3/MAVS/CAMK1/FYN/ERBB2/NPEPPS/HSPA1L/SHH/JUP/MIEF2/PAK1/KCNB1/MAPK14/SLC51B/MYO1C/TM9SF4/IL1B/ARIH2/SFN/UBE2L3/ABLIM3/EMD/PCM1/STOM/TCAF2/BAG3/ECT2/NUTF2/PRNP
liver	turquoise	BP	GO:0044262	cellular carbohydrate metabolic process	PFKFB1/MOGAT2/MOGAT1/IDNK/RORC/GPER1/GNMT/SLC45A3/TKFC/ABHD10/EXTL2/PTK2B/AKT2/PPP1R3B/INPP5B/PPP1R1A/ENOSF1/KHK/EPM2AIP1/NFE2L1/PTEN/GNPTG/GAA/PPP1CC/PASK/PRKAG2/PPP1R3C/SESN2/SYNJ2/PPP1R3D/NDST1/AKT1/STK40/B3GNT4/PYGB/PGP/INPP1/MTMR7/LCMT1/SLC2A1/FOXK2/DYSF/FOXK1/HDAC4/GOT1/B3GNT5/HK2/MTMR2/EXT2/PTPN2/B4GALT5/GK/PHLDA2/EXT1/GYG1
liver	turquoise	BP	GO:0060271	cilium assembly	NINL/TTC36/IFT46/HDAC6/ONECUT2/HAUS4/CFAP20/PKHD1/DNAH1/BBS4/CKAP5/CFAP410/SEPTIN2/FAM92A/NPHP3/BBS9/CEP162/TEKT5/CEP72/CETN2/DNAH7/FOXJ1/GORAB/IFT20/IFT52/MAK/SNX10/DNAL1/TMEM67/CDKL1/ATP6V0D1/TUBA4A/RSPH9/C5orf30/B9D1/CFAP54/TUBB/HAUS7/POC1A/CYLD/LRRC49/KIF3A/TUBG1/ABCC4/UBXN10/CCP110/CEP83/DNAH5/BBS7/TEKT1/PARVA/ABLIM1/CEP97/ABLIM3/PCM1/DNM2/ACTR1A/CFAP221/TUBB4B/NDE1/MAP4/IFT57/DCTN2/SEPTIN9/…
liver	turquoise	BP	GO:0016042	lipid catabolic process	CYP4F12/CYP4A11/CYP27A1/IVD/ACAA1/ACAD10/CES3/FMC1/ECHS1/HSD17B14/ABHD1/APOC1/NEU4/CES4A/PLA2G15/CYP46A1/ACADS/CYP4F3/APOC3/BCO2/PLCG2/AKT2/ACAD11/HINT2/APOA1/NEU3/LIPG/ECI1/APOC2/APOE/APOA5/PLCD1/PLAAT2/PLD3/APOA2/ACOT8/FABP1/SESN2/LRCOL1/PLA2G4E/CYP26C1/PLCB1/IL1B/AKT1/CNR1/DAGLA/APOA4/SLC27A4/CYP26B1/SMPDL3B/PLBD1/NEU1/CYP27B1/NCEH1/PLA2G2A/PPARD/DDHD1/ACER2/GLA/SPP1/YWHAH/ASAH1
liver	turquoise	BP	GO:0070838	divalent metal ion transport	LIME1/SPHK2/SLC39A5/MRS2/GPER1/DRD1/TPCN2/STIMATE/TPCN1/SLC25A23/SLC30A10/SPG7/ADRA1A/PLCG2/FMR1/PTK2B/GSTM2/PACSIN3/GNAO1/CD4/BIN1/CHERP/CALM3/MICU3/SMDT1/FYN/ATP2B2/HTR2A/CDH23/CAMK2G/TRPV4/CX3CL1/AHNAK/CAMK2B/PKD2/KCNE2/DRD4/ISCU/P2RX7/NIPSNAP2/PLCB1/JPH3/GRIN2D/RGS9/GNB5/NIPA1/SLC39A4/CACNA1G/SLC8A2/TRPM6/PKD1L3/NCS1/SRI/CCR7/SLC24A4/TRPC4/JPH1/FAM155B/CACNA1D/PDE4B/CATSPER1/MYO5A/SLC30A3/ABL…
liver	turquoise	BP	GO:0050892	intestinal absorption	MOGAT2/ABCG8/SLC46A1/APOA1/SOAT2/APOA5/APOA2/FABP1/HAMP/APOA4/GCNT3/SLC2A5/VDR
liver	turquoise	BP	GO:0031668	cellular response to extracellular stimulus	SLC38A3/SLC39A5/TNRC6A/WDR59/BAIAP2/KANK2/FYN/DEPDC5/RRAGB/CBS/FOXA3/ATG14/WIPI2/ZFYVE1/SESN1/SREBF1/EIF2AK2/TNKS/P2RX7/SESN2/XBP1/KCNB1/AQP3/DAP/TNC/SLC39A4/WNT9B/DCTPP1/RRAGC/MAP3K5/CIB2/CASTOR2/ADORA2B/HNRNPA1/CLEC16A/SLC2A1/CYP27B1/RRAGD/CBL/SNW1/MAP1LC3B2/CDKN2B/GLRX2/FOSL1/CDKN1A/WDR45B/CD68/VDR/LCN2/WIPI1/HMOX1/MAP1LC3B
liver	turquoise	BP	GO:1902905	positive regulation of supramolecular fiber organization	TENM1/EPHA1/BAG4/RAC3/PTK2B/BAIAP2/APOA1/BIN1/APOE/ABI2/TRPV4/SPIRE2/WASF1/CX3CL1/PAK1/RAC1/SPIRE1/PPM1E/SCIN/CDC42EP2/MYO1C/ACTR3C/CCR7/ID1/FER/NIN/RB1/S100A10/ABL1/SH3PXD2B/F2RL1/ARPC5/FMN1/PPM1F/LIMK1/SWAP70/GRB2/NRP1/LIMCH1/ARPC3/ARPC5L/CFL1
liver	turquoise	BP	GO:0019217	regulation of fatty acid metabolic process	APOC1/SLC45A3/APOC3/PDP2/AKT2/SCAP/APOC2/SIRT4/APOA5/NFE2L1/TREX1/PRKAG2/SREBF1/FABP1/CEACAM1/APPL2/IL1B/ERFE/AKT1/CNR1/APOA4/LPGAT1/PDP1/TRIB3
liver	turquoise	BP	GO:0009069	serine family amino acid metabolic process	AMT/AGXT/GCAT/CSAD/PHGDH/RIDA/SCLY/TST/MRI1/CDO1/THNSL2/CBS/SLC7A11/SHMT2/SDSL
liver	turquoise	BP	GO:1901616	organic hydroxy compound catabolic process	CYP4F12/CYP4A11/LDHD/CYP27A1/SULT1A2/CYP46A1/TKFC/DBH/CYP4F3/SULT1A1/INPP5B/LRTOMT/APOE/PTEN/SYNJ2/INPP1/MTMR7/CYP27B1/MTMR2/GK
liver	turquoise	BP	GO:0031669	cellular response to nutrient levels	SLC38A3/SLC39A5/TNRC6A/WDR59/BAIAP2/KANK2/FYN/DEPDC5/RRAGB/FOXA3/ATG14/WIPI2/ZFYVE1/SESN1/SREBF1/EIF2AK2/TNKS/P2RX7/SESN2/XBP1/KCNB1/AQP3/DAP/TNC/SLC39A4/WNT9B/RRAGC/MAP3K5/CIB2/CASTOR2/HNRNPA1/CLEC16A/SLC2A1/CYP27B1/RRAGD/CBL/SNW1/MAP1LC3B2/CDKN2B/CDKN1A/WDR45B/CD68/VDR/LCN2/WIPI1/HMOX1/MAP1LC3B
liver	turquoise	BP	GO:0034381	plasma lipoprotein particle clearance	CES3/APOC1/APOC3/APOM/APOA1/SOAT2/LIPG/APOC2/APOE/LMF1/LDLRAP1/APOA2/AMN/HDLBP/AP2M1/NPC1/VLDLR/NCEH1/HMOX1
liver	turquoise	BP	GO:0034378	chylomicron assembly	APOC3/APOA1/APOC2/APOE/APOA2/APOA4
liver	turquoise	BP	GO:0007584	response to nutrient	F7/HMGCL/MGMT/ABCG8/BAIAP2/APOA1/CD4/LIPG/LRAT/KANK2/PEMT/DNMT3B/FYN/P2RX6/CYP1A1/PTEN/OGG1/TNKS/P2RX7/XBP1/POR/ALDH1A2/AQP3/TNC/HAMP/ITGA2/ACSL4/IL1B/CNR1/SLC27A4/CIB2/CASTOR2/CYP26B1/TNFRSF11B/ADA/CYP27B1/KCNJ11/PPARD/SNW1/CDKN2B/VDR/AACS/SPP1/HMOX1
liver	turquoise	BP	GO:0042058	regulation of epidermal growth factor receptor signaling pathway	ZGPAT/GPER1/MVB12B/SOS1/PTPRJ/EPN1/ERRFI1/PTK6/PTPN3/GPRC5A/TGFA/VPS25/CEACAM1/AKT1/ITGA1/FER/CBL/GRB2/STAM/PTPN12/PTPN2/CNOT9
liver	turquoise	BP	GO:0006066	alcohol metabolic process	MOGAT2/MOGAT1/SPHK2/CYP27A1/GPER1/ADH1A/SULT1A2/RDH5/APOC1/GPD1/CYP46A1/TKFC/DBH/CEBPA/SULT1A1/PLCG2/PTK2B/PCBD1/DGAT1/APOA1/TM7SF2/SOAT2/INPP5B/PMVK/LRAT/SCAP/APOE/NFYB/CYP1A1/APOA5/NFE2L1/FDXR/LMF1/PTEN/PLCD1/LDLRAP1/APOA2/NR0B2/SREBF1/SYNJ2/CLCN2/PLCB1/POR/ALDH1A2/NUDT11/ALDH1A3/DHRS9/HDLBP/IL1B/APOA4/ACSS1/NPC1/PGP/INPP1/MTMR7/VLDLR/CYP27B1/DYSF/PPARD/GOT1/MTMR2/ACER2/VDR/ITPKC/GK/ASAH1
liver	turquoise	BP	GO:0051495	positive regulation of cytoskeleton organization	TENM1/EPHA1/BAG4/RAC3/PTK2B/BAIAP2/APOA1/BIN1/ABI2/TRPV4/SPIRE2/WASF1/CX3CL1/NTF3/PAK1/P2RX7/CCL27/RAC1/SPIRE1/PPM1E/SCIN/CDC42EP2/MYO1C/ACTR3C/POC1A/CCR7/ID1/FER/NIN/S100A10/ABL1/SH3PXD2B/F2RL1/ARPC5/FMN1/PPM1F/LIMK1/SWAP70/GRB2/NRP1/LIMCH1/PFDN2/ARPC3/ARPC5L/CFL1
liver	turquoise	BP	GO:0072511	divalent inorganic cation transport	LIME1/SPHK2/SLC39A5/MRS2/GPER1/DRD1/TPCN2/STIMATE/TPCN1/SLC25A23/SLC30A10/SPG7/ADRA1A/PLCG2/FMR1/PTK2B/GSTM2/PACSIN3/GNAO1/CD4/BIN1/CHERP/CALM3/MICU3/SMDT1/FYN/ATP2B2/HTR2A/CDH23/CAMK2G/TRPV4/CX3CL1/AHNAK/CAMK2B/PKD2/KCNE2/DRD4/ISCU/P2RX7/NIPSNAP2/PLCB1/JPH3/GRIN2D/RGS9/GNB5/NIPA1/SLC39A4/CACNA1G/SLC8A2/TRPM6/PKD1L3/NCS1/SRI/CCR7/SLC24A4/TRPC4/JPH1/FAM155B/CACNA1D/PDE4B/CATSPER1/MYO5A/SLC30A3/ABL…
liver	turquoise	BP	GO:0001523	retinoid metabolic process	CYP2C8/ADH1A/CYP4V2/RDH5/APOC3/BCO2/APOM/DGAT1/APOA1/CYP3A5/LRAT/APOC2/APOE/CYP3A7/CYP1A1/SDC1/APOA2/CYP26C1/ALDH1A2/ALDH1A3/DHRS9/APOA4/LRP8/CYP26B1/PPARD
liver	turquoise	CC	GO:0042627	chylomicron	APOC1/APOC3/APOA1/APOC2/APOE/APOA5/APOA2/APOA4
liver	turquoise	CC	GO:0034361	very-low-density lipoprotein particle	APOC1/APOC3/APOM/APOA1/APOC2/APOE/APOA5/APOA2/APOA4/VLDLR
liver	turquoise	CC	GO:0034385	triglyceride-rich plasma lipoprotein particle	APOC1/APOC3/APOM/APOA1/APOC2/APOE/APOA5/APOA2/APOA4/VLDLR
liver	turquoise	CC	GO:0030055	cell-substrate junction	ARMC5/FGFR3/ZFYVE21/SORBS2/NUMB/PTK2B/GRB7/ALKBH6/TRPV4/WASF1/AHNAK/PPP1CC/JUP/ADD1/SMPX/PAK1/LIMD1/MTF2/ARHGAP26/ITGB6/CAPN1/RAC1/EPPK1/TNC/CSRP2/PARVB/TNS3/ITGB3/KLF11/SLC4A2/ITGA2/NECTIN2/PDLIM1/HMGA1/CD151/CAPN2/PI4KA/DDR2/FLRT3/JAK2/ITGA1/CD9/RND3/CIB2/APBB1IP/PARVA/PACSIN2/SDCBP/ACTB/DNM2/ARPC5/ACTG1/LCP1/DLC1/TLN2/CBL/ZYX/LIMK1/GNA12/NRP1/PTPN12/REXO2/ARPC3/ITGAV/FLII/SNTB2/PVR/ARPC5L/ADAM…
liver	turquoise	CC	GO:0005924	cell-substrate adherens junction	ARMC5/FGFR3/ZFYVE21/SORBS2/NUMB/PTK2B/GRB7/ALKBH6/TRPV4/WASF1/AHNAK/PPP1CC/JUP/ADD1/SMPX/PAK1/LIMD1/MTF2/ARHGAP26/ITGB6/CAPN1/RAC1/TNC/CSRP2/PARVB/TNS3/ITGB3/KLF11/SLC4A2/ITGA2/NECTIN2/PDLIM1/HMGA1/CD151/CAPN2/PI4KA/DDR2/FLRT3/JAK2/ITGA1/CD9/RND3/CIB2/APBB1IP/PARVA/PACSIN2/SDCBP/ACTB/DNM2/ARPC5/ACTG1/LCP1/DLC1/TLN2/CBL/ZYX/LIMK1/GNA12/NRP1/PTPN12/REXO2/ARPC3/ITGAV/FLII/SNTB2/PVR/ARPC5L/ADAM9/YWHA…
liver	turquoise	CC	GO:0005903	brush border	DCXR/ESPN/SLC15A1/PDZK1/SLC17A3/SLC46A1/SOAT2/ANKS4B/PEMT/SCART1/AMN/MYO7B/SCIN/SLC7A11/MYO1C/TRPM6/SLC27A4/CA4/KCNK1/SLC9A3R1/MYO1E/SLC34A2/GNA12/FLII/ACTN1
liver	turquoise	CC	GO:0098862	cluster of actin-based cell projections	DCXR/ESPN/SLC15A1/PDZK1/SLC17A3/SLC46A1/MYO15A/MORN4/ESPNL/SOAT2/ANKS4B/PEMT/CDH23/SCART1/AMN/MYO7B/IFT20/LOXHD1/SCIN/SLC7A11/MYO1C/TRPM6/SLC27A4/CIB2/CA4/KCNK1/SLC9A3R1/MYO1E/SLC4A7/SLC34A2/GNA12/FLII/ACTN1
liver	turquoise	CC	GO:0005925	focal adhesion	ARMC5/FGFR3/ZFYVE21/SORBS2/NUMB/PTK2B/GRB7/ALKBH6/TRPV4/WASF1/AHNAK/PPP1CC/JUP/ADD1/PAK1/LIMD1/MTF2/ARHGAP26/ITGB6/CAPN1/RAC1/TNC/CSRP2/PARVB/TNS3/ITGB3/KLF11/SLC4A2/ITGA2/NECTIN2/PDLIM1/HMGA1/CD151/CAPN2/PI4KA/DDR2/FLRT3/JAK2/ITGA1/CD9/RND3/APBB1IP/PARVA/PACSIN2/SDCBP/ACTB/DNM2/ARPC5/ACTG1/LCP1/DLC1/TLN2/CBL/ZYX/LIMK1/GNA12/NRP1/PTPN12/REXO2/ARPC3/ITGAV/FLII/SNTB2/PVR/ARPC5L/ADAM9/YWHAZ/TLN1/ANX…
liver	turquoise	CC	GO:0034364	high-density lipoprotein particle	APOC1/APOC3/APOM/APOA1/APOC2/APOE/APOA5/APOA2/HDLBP/APOA4
liver	turquoise	CC	GO:0033267	axon part	HCN3/NDRG2/GPER1/RAC3/SCN8A/SPG7/LRIG2/FMR1/PTK2B/ANG/ADCY10/BIN1/CALM3/AP1S1/AUTS2/TRPV4/LRRTM1/SCN2A/TH/CTNND1/NGEF/SHTN1/RAB27B/BLOC1S1/CRTAC1/ELK1/RASGRF1/TERF2/KCNQ3/ITSN1/NRCAM/PCDHGB1/ATP6V0D1/ITGA2/AURKA/NCS1/SRI/FLRT3/CNR1/DGKI/DAGLA/KIF3A/KCNC1/AP3B2/KIF5C/NIN/POLG/UCHL1/MYO5A/GAD1/ACTB/DNM2/ARPC5/ACTG1/SPTBN1/KCNJ11/CBL/ARL8A/GOT1/KIF21B/DTNBP1/NPTX2/NRP1/GPRIN1/DCTN2/DYNLT1/ARPC3/HIF1A
liver	turquoise	CC	GO:0099092	postsynaptic density, intracellular component	BAIAP2/PSD/FYN/CTNND1/TANC2/DNM2/BCR/PRR7
liver	turquoise	CC	GO:0042581	specific granule	ACAA1/HGSNAT/ORMDL3/DGAT1/TMEM63A/TOLLIP/PTPRJ/JUP/PTX3/ATP8B4/RAB44/MMP8/CEACAM1/FOLR3/SLPI/RAP2B/ANXA3/SLC2A5/ANXA11/TSPAN14/GPR84/CLEC5A/NEU1/CANT1/RETN/SLC15A4/CLEC4D/TMBIM1/STOM/CD177/CHI3L1/ITGAV/LCN2/DEGS1
liver	turquoise	CC	GO:0098793	presynapse	RAB26/HCN3/STX1B/GPER1/SEPTIN4/DRD1/ROGDI/BAIAP3/SNAP47/CYP46A1/SPTBN2/SVOP/ADRA1A/FMR1/APH1A/BAIAP2/BIN1/CALM3/SLC29A1/RAB33B/ATP2B2/HTR2A/C16orf70/AP1S1/SLC29A2/BSN/SCN2A/TH/CTNND1/PPP1CC/NTF3/SYNGR1/SYT17/SYPL2/PPFIBP2/P2RX7/SLC2A8/RAB27B/SYNJ2/NPTN/ELK1/SYN2/ITSN1/STXBP5/SLC6A17/OTOF/GNB5/SV2A/ATP6V0D1/SYNGR3/ITGA2/NCS1/SRI/FLRT3/CNR1/DGKI/KCNC1/CACNA1D/PDE4B/POLG/FZD3/SLC30A3/GAD1/ACTB/MCTP2…
liver	turquoise	MF	GO:0016705	oxidoreductase activity, acting on paired donors, with incorporation or reduction of molecular oxygen	CYP4F12/CYP4A11/CYP27A1/CYP4A22/CYP4X1/CYP2C8/CYP4V2/CYP4Z1/CYP2A6/CYP46A1/DBH/CYP4F3/OGFOD2/CYP2C19/PCBD1/MICAL3/CYP2A7/CYP3A5/CYP2G1P/TET3/CYP3A7/CYP2B6/CYP1A1/CYP2W1/KDM8/ALKBH4/TH/KDM2B/CYP26C1/POR/KDM4B/KDM7A/CYP26B1/CYP27B1/P4HA2/PLOD3/HSPBAP1/DEGS1/HMOX1
liver	turquoise	MF	GO:0016712	oxidoreductase activity, acting on paired donors, with incorporation or reduction of molecular oxygen, reduced flavin or flavoprotein as one donor, and incorporation of one atom of oxygen	CYP4F12/CYP4X1/CYP2C8/CYP4Z1/CYP2A6/CYP2C19/CYP2A7/CYP3A5/CYP2G1P/CYP3A7/CYP2B6/CYP1A1/CYP2W1
liver	turquoise	MF	GO:0008391	arachidonic acid monooxygenase activity	CYP4F12/CYP4A11/CYP2C8/CYP2A6/CYP2C19/CYP2A7/CYP2G1P/CYP2B6/CYP1A1
liver	turquoise	MF	GO:0004497	monooxygenase activity	CYP4F12/CYP4A11/CYP27A1/CYP4A22/CYP4X1/CYP2C8/CYP4V2/CYP4Z1/CYP2A6/CYP46A1/DBH/CYP4F3/CYP2C19/PCBD1/MICAL3/CYP2A7/CYP3A5/CYP2G1P/CYP3A7/CYP2B6/CYP1A1/CYP2W1/TH/CYP26C1/CYP26B1/CYP27B1
liver	turquoise	MF	GO:0016829	lyase activity	FTCD/UROC1/HMGB1/NTHL1/HMGCL/CA14/ALDOB/ECHS1/CSAD/SCLY/ADCY1/TKFC/PCBD1/DDTL/ENO3/ADCY10/THNSL2/ECI1/ENOSF1/CYP1A1/UROS/CBS/CA5A/OGG1/NPR2/UROD/HDC/CA8/CA12/SHMT2/CHAC1/CA5B/APMAP/RNASE2/GAD1/SDSL/CA4/UXS1/CD38/GMDS/GOT1
liver	turquoise	MF	GO:0020037	heme binding	CYP4F12/CYP4A11/SUOX/CYP27A1/CYP4A22/CYP4X1/CYP2C8/CYP4V2/CYP4Z1/CYP2A6/CYP46A1/CYP4F3/CYP2C19/IDO2/CYGB/CYP2A7/CYP3A5/CYP2G1P/CYP3A7/CYP2B6/CYP1A1/CYP2W1/CBS/CYP26C1/FLVCR2/LOXHD1/JAK2/CYP26B1/STEAP4/CYP27B1/FLVCR1/HMOX1
liver	turquoise	MF	GO:0008093	cytoskeletal adaptor activity	SORBS2/BAIAP2/OBSL1/ABI2/SDCBP/ACTR1A/BIN3/BICD1
liver	turquoise	MF	GO:0008392	arachidonic acid epoxygenase activity	CYP4F12/CYP4A11/CYP2C8/CYP2A6/CYP2C19/CYP2A7/CYP2G1P/CYP2B6
liver	turquoise	MF	GO:0005248	voltage-gated sodium channel activity	HCN3/SCN8A/TPCN1/SCN11A/SCN9A/SCN2A/PKD2/SCN5A/SCN3B

## Sheet: SI_without ncRNAs_GO
Table S3-4: GO enrichment of small intestine without ncRNAs (group 4).
Tissue	Module	ONTOLOGY	ID	Description	GeneID
Small Intestine	blue	BP	GO:0006805	xenobiotic metabolic process	CYP2U1/AS3MT/AOC2/RORA/GSTM2/FMO3/N6AMT1/CYP2D7/CYB5B/ALDH3A1/NQO1/MGST1/AKR7A2/SULT1A3/CYP2W1/CYP3A4/CYP2D6/EPHX2/UGT1A8/GSTM4/GSTA2/GSTA1/UGT2B15/AADAC/CMBL/GSTO2/GGT1/SULT1A1/UGT1A1/DPEP1/CYP2C9/SULT1A2/CYP2C19/CYP2J2/CYP3A5/AOC1/CYP2C18/UGT1A10/CYP2B6/ACY3/AKR7L/NAT1/CYP2S1/SULT1B1/CES2/AKR7A3/NR1I2/CES3/ACY1/HNF4A/NAT2
Small Intestine	blue	BP	GO:0007586	digestion	WNK1/PTGER1/AQP5/UCN/COPA/NR1H3/TFF2/SOAT2/PRSS2/LIMA1/TRPV1/SST/MUC4/APOA4/APOA1/PNLIPRP2/LCT/SGK1/WNK4/ARX/SOX9/GUCA2B/MGAM/SLC2A5/TFF1/ALPI/SLC5A1/GUCA2A/SLC2A2/NEUROD1/SI/GCNT3/FABP2/FABP1/ABCG5/CAPN8/MUC13/SLC26A6/TFF3/MOGAT2/MUC2/KCNQ1/PBLD/CAPN9/ABCG8/F11R/VIL1/PLS1/PRSS3/GUCY2C/INAVA/VDR
Small Intestine	blue	BP	GO:0071466	cellular response to xenobiotic stimulus	HSF1/CYP2U1/NR3C1/FOXO1/AS3MT/AOC2/SMYD3/RORA/TMEM38A/CFLAR/GSTM2/FMO3/N6AMT1/CYP2D7/CYB5B/ALDH3A1/NQO1/MGST1/AKR7A2/SULT1A3/CYP2W1/CYP3A4/PCK1/SRD5A1/CYP2D6/ABCC2/EPHX2/UGT1A8/GSTM4/GSTA2/GSTA1/UGT2B15/AADAC/CMBL/GSTO2/GGT1/GJB2/SULT1A1/UGT1A1/DPEP1/CYP2C9/SULT1A2/CYP2C19/CYP2J2/CYP3A5/AOC1/CYP2C18/UGT1A10/CYP2B6/ACY3/AKR7L/NAT1/CYP2S1/PCK2/SULT1B1/CES2/AKR7A3/NR1I2/CES3/ACY1/HNF4A/NAT2
Small Intestine	blue	BP	GO:0008202	steroid metabolic process	CNBP/TSPOAP1/MBTPS1/LCAT/MECP2/SIRT1/ESR1/ABCA1/STUB1/HSD17B14/CYP7B1/CYP21A2/RORA/REST/MED1/PANK2/ABCB11/LHB/FDXR/TM7SF2/MVD/ACADVL/ACAT2/SULT1A4/FDFT1/HSD3B7/HSD17B4/SQLE/IDI1/SOAT2/FDPS/HMGCS2/SULT1A3/HSD17B8/AKR1C4/FGFR4/PCSK9/UGT2B17/LIMA1/ELOVL6/DHCR7/G6PC/APOA4/APOA1/LIPA/APOBR/OSBP/SULT2A1/CYP3A4/SULT2B1/APOB/HMGCS1/HSD3B1/SRD5A1/CYP2D6/TFCP2L1/SULT1E1/EPHX2/NR0B2/GBA2/UGT1A8/MSMO1/DHCR24…
Small Intestine	blue	BP	GO:0009410	response to xenobiotic stimulus	RELA/HSF1/HDAC9/RGS10/PRKACB/HDAC5/PRKCE/CYP2U1/NR3C1/HTR3A/FOXO1/AS3MT/AOC2/HOMER1/DNMT3A/PPP3CA/SMYD3/RORA/TMEM38A/CFLAR/RANBP2/TRDMT1/GSTM2/FMO3/N6AMT1/NPFF/RGS17/FADD/CYP2D7/F7/CYB5B/ALDH3A1/NQO1/MGST1/AKR7A2/GCLC/SULT1A3/CYP2W1/PPARG/GSS/CYP3A4/PCK1/SRD5A1/CYP2D6/ABCC2/PPP1R1B/EPHX2/UGT1A8/GSTM4/GSTA2/GSTA1/UGT2B15/AADAC/CPS1/CMBL/GSTO2/GGT1/GJB2/SULT1A1/UGT1A1/DPEP1/CYP2C9/SULT1A2/CYP2C19/C…
Small Intestine	blue	BP	GO:0022600	digestive system process	WNK1/PTGER1/AQP5/UCN/COPA/NR1H3/TFF2/SOAT2/LIMA1/TRPV1/MUC4/APOA4/APOA1/SGK1/WNK4/SOX9/SLC2A5/TFF1/SLC5A1/SLC2A2/NEUROD1/GCNT3/FABP2/FABP1/ABCG5/MUC13/SLC26A6/TFF3/MOGAT2/MUC2/KCNQ1/PBLD/ABCG8/F11R/VIL1/PLS1/INAVA/VDR
Small Intestine	blue	BP	GO:0015711	organic anion transport	ATP11C/TSPOAP1/SLC25A32/RPS6KB1/SLC36A4/PLEKHA8P1/SLCO3A1/P2RX7/SLC38A6/ABCA1/SLC26A4/SLC27A3/ARL6IP5/SLC43A1/CA5B/ACSL4/SLC25A29/SLC16A7/SLC1A2/SLC16A14/SLC4A5/SLC38A2/ATP9B/SLC13A4/SLC25A14/FOLR2/SLCO5A1/SLC13A5/SLC16A3/SLC19A1/ABCB11/PLA2G3/SLC6A14/CA9/SLC38A10/NOS2/SLC33A1/SLC7A11/SLC3A2/PLA2G2A/CA12/SLC10A7/SLC16A10/APOC2/PRELID1/AKR1C4/SLC43A2/PPARG/ABCA4/TRPV1/G6PC/APOA4/APOA1/MAP2K6/SLC35…
Small Intestine	blue	BP	GO:0006066	alcohol metabolic process	ITPKB/INPP4A/CNBP/CYP27C1/MBTPS1/LCAT/INPP5B/MECP2/MOXD1/NUDT3/ABCA1/INPPL1/CYP7B1/RDH14/ALDH1A3/REST/SPHK1/DPM1/INPP5K/SLC5A3/ASAH2B/FDXR/IP6K2/TM7SF2/MVD/ACADVL/ACAT2/GALK1/FDFT1/SPTLC2/HSD3B7/SQLE/IDI1/SOAT2/AKR7A2/FDPS/HMGCS2/SULT1A3/GCH1/AKR1C4/PCSK9/NAPEPLD/LIMA1/ELOVL6/DHCR7/APOA4/APOA1/APOBR/SULT2A1/CYP3A4/NAAA/TPI1/GPD1/SULT2B1/APOB/PCK1/HMGCS1/CYP2D6/PPIP5K1/SULT1E1/EPHX2/NR0B2/GBA2/MSM…
Small Intestine	blue	BP	GO:0050892	intestinal absorption	SOAT2/LIMA1/APOA4/APOA1/SLC2A5/SLC5A1/SLC2A2/GCNT3/FABP2/FABP1/ABCG5/SLC26A6/MOGAT2/KCNQ1/ABCG8/F11R/VIL1/PLS1/VDR
Small Intestine	blue	BP	GO:0001676	long-chain fatty acid metabolic process	CYP2U1/FADS1/SLC27A3/ACSL4/PLA2G4C/GSTM2/FADS2/GLYATL2/GPX4/HPGDS/ALOX15B/ASAH2B/CYP2D7/PNPLA3/HSD17B4/ELOVL6/CYP3A4/ELOVL1/CYP2D6/EPHX2/GSTM4/GSTA1/CYP4F2/CBR1/CYP2C9/CYP4F3/CYP2C19/CYP2J2/CYP4F12/CYP2C18/CYP2B6/AKR1C3/CYP2S1/FAAH/PLA2G10/SLC27A2/ADTRP/ACSL5
Small Intestine	blue	BP	GO:0005996	monosaccharide metabolic process	PPP1R3F/HK1/GPLD1/PIK3CA/SIRT1/PRKCE/SLC2A3/ATF4/C1QTNF3/IGFBP3/INPPL1/FOXO1/FOXK1/RORA/WDTC1/HECTD4/RANBP2/MAN2B2/GCK/INPP5K/KAT2B/B3GLCT/ACTN3/POMC/TKTL1/ENO1/SDS/PGK1/PHLDA2/KCNJ11/GALK1/GDPGP1/FUCA1/GCLC/GLB1/PMM2/UGT2B17/GCG/PGD/G6PC/TPI1/GPD1/HK2/PCK1/UGT1A8/UGT2B15/ALDOB/UGT2B7/C1QTNF12/PFKL/SLC35A2/GSTO2/MST1/SELENOS/FOXA2/GALM/UGT1A1/SLC25A1/PKLR/PFKFB4/FUT4/SLC23A1/AKR1A1/CRYL1/UGT2A3/K…
Small Intestine	blue	BP	GO:0033559	unsaturated fatty acid metabolic process	SIRT1/CYP2U1/FADS1/PLA2G4C/PIBF1/GSTM2/FADS2/GLYATL2/HPGDS/ALOX15B/CYP2D7/HSD17B4/AKR1C4/ELOVL6/DECR2/ELOVL1/CYP2D6/EPHX2/GSTA1/CYP4F2/CBR1/PTGR1/PRXL2B/CYP2C9/EDN2/CYP4F3/CYP2C19/CYP2J2/CYP4F12/CYP2C18/CYP2B6/AKR1C3/ELOVL7/CYP2S1/CES2/FAAH/PLA2G10/PLA2G4F
Small Intestine	blue	BP	GO:0006631	fatty acid metabolic process	HACD4/MORC2/SIRT1/CYP2U1/FADS1/SLC27A3/ACSL4/PLA2G4C/ACADSB/AASDH/WDTC1/ABHD1/PIBF1/TWIST1/NR4A3/GSTM2/FADS2/GPAT2/GLYATL2/PANK2/GPX4/HPGDS/PLA2G3/ALOX15B/ASAH2B/CYP2D7/NR1H3/ALKBH7/XBP1/ACADVL/ACAT2/PNPLA3/HSD17B4/LYPLA1/APOC2/LIPG/HSD17B8/ACAD10/AKR1C4/PPARG/ACSF2/GSTZ1/ELOVL6/APOA4/TECR/CYP3A4/NAAA/DECR2/ABHD3/AACS/MLXIPL/APOC3/PCK1/ELOVL1/CYP2D6/EIF6/EPHX2/UGT1A8/MSMO1/GSTM4/LPIN3/GSTA1/CYP4F…
Small Intestine	blue	BP	GO:1901568	fatty acid derivative metabolic process	PPT1/SIRT1/CYP2U1/FADS1/ACSL4/PLA2G4C/PIBF1/GPX4/HPGDS/PLA2G3/ALOX15B/CYP2D7/HSD17B4/HMGCS2/HSD17B8/AKR1C4/ELOVL6/TECR/AACS/ELOVL1/FAR2/CYP2D6/EPHX2/GSTA1/CYP4F2/CBR1/PTGR1/GGT1/PRXL2B/SLC25A1/DPEP1/CYP2C9/EDN2/CYP4F3/CYP2C19/CYP2J2/CYP4F12/CYP2C18/CYP2B6/AKR1C3/ELOVL7/BDH1/CYP2S1/CES2/FAAH/PLA2G10/DGAT1/GGT6/ACSL5/PLA2G4F
Small Intestine	blue	BP	GO:0055088	lipid homeostasis	HDAC9/ABHD8/LCAT/SIRT1/ABCA1/ZBTB20/C1QTNF3/CYP7B1/RORA/NR1D2/RCN3/NR1H3/XBP1/RALY/PNPLA3/ORMDL2/SOAT2/APOC2/LIPG/FGFR4/IL18/PCSK9/PPARG/LIMA1/APOM/G6PC/APOA4/TLCD1/APOA1/MLXIPL/APOC3/APOB/EPHX2/CEBPA/MTTP/TM6SF2/ABCG5/MALL/MALRD1/ABCG8/PLA2G10/DGAT1/PLA2G12B/NR1H4/HNF4A/NR5A2
Small Intestine	blue	BP	GO:0042632	cholesterol homeostasis	HDAC9/LCAT/SIRT1/ABCA1/CYP7B1/RORA/NR1H3/XBP1/RALY/SOAT2/APOC2/LIPG/FGFR4/IL18/PCSK9/LIMA1/APOM/G6PC/APOA4/APOA1/APOC3/APOB/EPHX2/MTTP/ABCG5/MALL/MALRD1/ABCG8/PLA2G10/PLA2G12B/NR1H4/HNF4A/NR5A2
Small Intestine	blue	BP	GO:0055092	sterol homeostasis	HDAC9/LCAT/SIRT1/ABCA1/CYP7B1/RORA/NR1H3/XBP1/RALY/SOAT2/APOC2/LIPG/FGFR4/IL18/PCSK9/LIMA1/APOM/G6PC/APOA4/APOA1/APOC3/APOB/EPHX2/MTTP/ABCG5/MALL/MALRD1/ABCG8/PLA2G10/PLA2G12B/NR1H4/HNF4A/NR5A2
Small Intestine	blue	BP	GO:0034378	chylomicron assembly	APOC2/APOA4/APOA1/APOC3/APOB/PLAGL2/P4HB/MTTP
Small Intestine	blue	BP	GO:0055081	anion homeostasis	KCTD7/SIRT1/ABCA1/RCN3/SLC7A11/XBP1/CA12/LIPG/FGFR4/SLC12A2/TLCD1/APOA1/SLC12A7/MLXIPL/SLC66A1/ABCC2/OTC/CPS1/SLC12A8/SLC9A3R1/DGAT1/NR1H4/HNF4A
Small Intestine	blue	BP	GO:0016042	lipid catabolic process	CRTC3/RARRES2/GPLD1/INPP5F/PPT1/PRKCE/PLD6/HSD17B14/PLA2G4C/PLCXD3/ABHD1/SPHK1/TWIST1/GLYATL2/PLD2/PLA2G3/GDPD3/GLA/CES4A/ASAH2B/ACADVL/ACAT2/PNPLA3/PLA2G2A/HSD3B7/HSD17B4/PLBD1/APOC2/FUCA1/LIPG/ACAD10/NAPEPLD/APOA4/APOA1/LIPA/PNLIPRP2/SULT2A1/CYP3A4/NAAA/DECR2/ABHD3/FABP6/APOC3/APOB/PCK1/SRD5A1/SULT1E1/GBA2/LPIN3/CYP27A1/PLB1/AADAC/CYP4F2/CPS1/CPT2/NEU4/IDH1/HSD17B11/AKR1B10/DECR1/ACBD5/ACADS/FA…
Small Intestine	blue	BP	GO:0034754	cellular hormone metabolic process	TSPOAP1/CYP27C1/ESR1/HSD17B14/RDH14/CYP21A2/ALDH1A3/REST/SCPEP1/MED1/ASMT/LHB/FDXR/HSD17B4/HSD17B8/AKR1C4/CYP3A4/HSD3B1/SRD5A1/CYP2D6/SULT1E1/UGT1A8/ADH1C/HSD3B2/PLB1/UGT2B7/SHH/HSD17B11/SULT1A1/UGT1A1/AKR1B10/CYP2C9/CYP3A5/CYP2C18/AKR1C3/CYP2S1/DGAT1/ADH6/DHRS11/HSD17B2
Small Intestine	blue	BP	GO:0032530	regulation of microvillus organization	ATP8B1/CDHR5/CDHR2/PLD1/KLF5/VIL1/PLS1/RAP1GAP/USH1C
Small Intestine	blue	BP	GO:0034377	plasma lipoprotein particle assembly	PRKACB/LCAT/ABCA1/SOAT2/APOC2/APOM/APOA4/APOA1/APOC3/APOB/PLAGL2/P4HB/MTTP/DGAT1
Small Intestine	blue	BP	GO:0019320	hexose catabolic process	HK1/FOXK1/GCK/ACTN3/TKTL1/ENO1/PGK1/GALK1/GLB1/TPI1/HK2/ALDOB/PFKL/GALM/PKLR/FUT4/KHK/GLYCTK/FUT2/TKFC/GALE/FUT6
Small Intestine	blue	BP	GO:0016266	O-glycan processing	GALNT9/ST3GAL2/MUC1/B3GNT2/MUC20/MUC4/MUC12/GALNT6/GALNT14/GALNT1/GCNT3/MUC17/MUC13/GCNT1/MUC3A/B3GNT6/MUC2/GALNT4/GALNT5/B3GNT8/B3GNT7/GALNT3/B3GNT3
Small Intestine	blue	BP	GO:0006694	steroid biosynthetic process	CNBP/TSPOAP1/MBTPS1/SIRT1/HSD17B14/CYP7B1/CYP21A2/REST/MED1/ABCB11/LHB/FDXR/TM7SF2/MVD/ACAT2/FDFT1/HSD3B7/HSD17B4/SQLE/IDI1/FDPS/HMGCS2/HSD17B8/AKR1C4/FGFR4/ELOVL6/DHCR7/APOA4/APOA1/OSBP/CYP3A4/APOB/HMGCS1/HSD3B1/SRD5A1/TFCP2L1/MSMO1/DHCR24/HSD3B2/CYP27A1/STARD4/HMGCR/CFTR/HSD17B11/EBP/HSD11B2/MALRD1/AKR1C3/ATP1A1/SLC27A2/DHRS11/HSD17B2/NR1H4/VDR
Small Intestine	blue	BP	GO:0019318	hexose metabolic process	PPP1R3F/HK1/GPLD1/PIK3CA/SIRT1/ATF4/C1QTNF3/IGFBP3/INPPL1/FOXO1/FOXK1/RORA/WDTC1/HECTD4/RANBP2/MAN2B2/GCK/INPP5K/KAT2B/B3GLCT/ACTN3/POMC/TKTL1/ENO1/SDS/PGK1/PHLDA2/KCNJ11/GALK1/GDPGP1/FUCA1/GLB1/PMM2/GCG/G6PC/TPI1/GPD1/HK2/PCK1/ALDOB/C1QTNF12/PFKL/SLC35A2/MST1/SELENOS/FOXA2/GALM/SLC25A1/PKLR/PFKFB4/FUT4/AKR1A1/KHK/SLC25A10/TFF3/FBP1/GLYCTK/FUT2/PCK2/TKFC/HKDC1/FUOM/GALE/SLC37A4/FUT6
Small Intestine	blue	BP	GO:0009743	response to carbohydrate	RAB11FIP2/ZFP36L1/SLC9B2/GPLD1/PIK3CA/WDR35/TGFBR2/KAT7/EIF2B4/PRKCE/ZBTB20/SIN3A/COLEC12/RHOA/PPP3CA/GYS2/RAB11B/P2RX3/GCK/RAP1B/SIDT2/CTSV/CDK16/PHPT1/KCNJ11/XBP1/TXN2/ACVR1C/ENDOG/GCLC/GCG/APOM/NKX2-2/MAP2K6/AACS/MLXIPL/RMI1/APOB/PCK1/NR0B2/C2CD2L/SLC2A5/C1QTNF12/HMGCR/PFKL/SELENOS/FOXA2/CASP3/CFTR/SRI/TRPM4/RFX6/NEUROD1/PKLR/KHK/SLC26A6/PCK2/NR1H4/HNF4A/MAPK13/HNF1B
Small Intestine	blue	BP	GO:0015849	organic acid transport	TSPOAP1/SLC25A32/RPS6KB1/SLC36A4/SLCO3A1/P2RX7/SLC38A6/SLC26A4/SLC27A3/ARL6IP5/SLC43A1/ACSL4/SLC25A29/SLC16A7/SLC1A2/SLC16A14/SLC38A2/SLC13A4/SLC25A14/FOLR2/SLC13A5/SLC16A3/SLC19A1/ABCB11/PLA2G3/SLC6A14/SLC38A10/NOS2/SLC7A11/SLC3A2/PLA2G2A/SLC10A7/SLC16A10/AKR1C4/SLC43A2/PPARG/TRPV1/MAP2K6/SLC66A1/SFXN5/STARD5/ABCC2/LCN12/SLC5A12/SLC25A20/MFSD2A/ATP8B1/CLN3/SLC7A9/ACE/SLC6A19/CYP4F2/SLC26A3/SLC10…
Small Intestine	blue	BP	GO:0046942	carboxylic acid transport	TSPOAP1/SLC25A32/RPS6KB1/SLC36A4/SLCO3A1/P2RX7/SLC38A6/SLC26A4/SLC27A3/ARL6IP5/SLC43A1/ACSL4/SLC25A29/SLC16A7/SLC1A2/SLC16A14/SLC38A2/SLC13A4/SLC25A14/FOLR2/SLC13A5/SLC16A3/SLC19A1/ABCB11/PLA2G3/SLC6A14/SLC38A10/NOS2/SLC7A11/SLC3A2/PLA2G2A/SLC10A7/SLC16A10/AKR1C4/SLC43A2/PPARG/TRPV1/MAP2K6/SLC66A1/SFXN5/STARD5/ABCC2/LCN12/SLC5A12/SLC25A20/MFSD2A/ATP8B1/CLN3/SLC7A9/ACE/SLC6A19/CYP4F2/SLC26A3/SLC10…
Small Intestine	blue	BP	GO:0072330	monocarboxylic acid biosynthetic process	HK1/HACD4/NUP133/CHST12/ASNSD1/SIRT1/P2RX7/ZBTB20/FADS1/ECD/CYP7B1/AAAS/FOXK1/WDTC1/ALDH1A3/ABHD1/PIBF1/RANBP2/HOGA1/FADS2/GCK/NUP58/ACTN3/GPX4/HPGDS/ENO1/SDS/ABCB11/PGK1/ALOX15B/ASAH2B/NR1H3/XBP1/ACADVL/GALK1/HSD3B7/HSD17B4/APOC2/LIPG/HSD17B8/AKR1C4/FGFR4/ELOVL6/APOA4/TECR/OSBP/CYP3A4/DECR2/ABHD3/MLXIPL/TPI1/GPD1/HK2/APOC3/ELOVL1/CYP2D6/EIF6/EPHX2/GSTM4/CYP27A1/SEC13/SIRT6/ALDOB/STARD4/CBR1/PRKA…
Small Intestine	blue	BP	GO:0046486	glycerolipid metabolic process	INPP4A/GPLD1/INPP5F/PIK3CA/LCAT/CSNK2A2/MTMR9/SOCS5/INPP5B/MECP2/SIRT1/PLD6/PDGFRB/PIP5KL1/FIG4/INPPL1/ACSL4/PLA2G4C/PTDSS2/PI4KA/RUFY1/SOCS3/PIK3R4/PI4KB/PIK3C3/DPM1/INPP5K/GPAT2/PI4KAP2/PLD2/PANK2/PLA2G3/GDPD3/GPAA1/NR1H3/PIK3R2/IP6K2/PIGF/MTM1/PNPLA3/PLA2G2A/CPNE7/PLBD1/APOC2/LIPG/PCSK9/ETNK1/NAPEPLD/SH3YL1/G6PC/APOA4/APOA1/APOBR/PNLIPRP2/LPCAT4/ABHD3/FABP6/DBI/GPD1/APOC3/APOB/PCK1/PGAP2/MBOAT…
Small Intestine	blue	BP	GO:0006720	isoprenoid metabolic process	RARRES2/CYP27C1/RDH14/ALDH1A3/DPM1/SCPEP1/MVD/FDFT1/IDI1/APOC2/FDPS/HMGCS2/AKR1C4/NAPEPLD/ABCA4/APOM/APOA4/APOA1/CYP3A4/APOC3/APOB/HMGCS1/SRD5A1/CYP2D6/UGT1A8/ADH1C/RBP2/PLB1/HMGCR/UGT1A1/AKR1B10/CYP2C9/CYP2C19/PDSS1/CYP3A5/CYP2C18/SDC1/AKR1C3/CYP2S1/DGAT1/ADH6
Small Intestine	blue	BP	GO:0046365	monosaccharide catabolic process	HK1/FOXK1/GCK/ACTN3/TKTL1/ENO1/PGK1/GALK1/GLB1/TPI1/HK2/ALDOB/PFKL/GALM/PKLR/FUT4/AKR1A1/CRYL1/KHK/GLYCTK/FUT2/TKFC/GALE/FUT6
Small Intestine	blue	BP	GO:0006790	sulfur compound metabolic process	ISCU/GAMT/METTL16/CHST12/PPT1/IDS/MTAP/MTR/CHSY1/HSCB/CSGALNACT1/ACSL4/ADO/ST3GAL2/AMD1/GSTM2/MAT2A/NUBP1/GPX4/MTRR/TKTL1/HPGDS/B3GNT2/CIAPIN1/PPCS/SLC7A11/GALNS/MVD/CHST13/SULT1A4/TXN2/SULT1C2/SLC19A3/MGST1/HSD17B4/TPK1/ACPP/SQOR/GCLC/HMGCS2/GLB1/SULT1A3/HSD17B8/ACSF2/GSTZ1/ELOVL6/GSS/SUCLG2/TECR/MCCC2/SULT2A1/SLC35B3/DBI/SULT2B1/ELOVL1/FAR2/HMGCS1/SULT1E1/ABCC2/MPST/GSTM4/GSTA2/GSTA1/CPS1/ETHE1…
Small Intestine	blue	BP	GO:0015748	organophosphate ester transport	ATP11C/SLC25A32/PLEKHA8P1/P2RX7/ABCA1/ATP9B/SLC33A1/APOC2/PRELID1/ABCA4/G6PC/APOA4/APOA1/SLC35B3/APOC3/CPTP/MFSD2A/ATP8B1/C2CD2L/ATP10B/STARD10/PRELID3B/MTTP/ABCB1/SLC25A24/ABCG8/GJB1/PLA2G10/SLC44A4/PRELID2/SLC37A1/TMEM30B/SLC37A4
Small Intestine	blue	BP	GO:0006690	icosanoid metabolic process	SIRT1/CYP2U1/FADS1/PLA2G4C/PIBF1/GPX4/HPGDS/PLA2G3/ALOX15B/CYP2D7/AKR1C4/CYP2D6/EPHX2/GSTA1/CYP4F2/CBR1/PTGR1/GGT1/PRXL2B/DPEP1/CYP2C9/EDN2/CYP4F3/CYP2C19/CYP2J2/CYP4F12/CYP2C18/CYP2B6/AKR1C3/CYP2S1/CES2/FAAH/PLA2G10/GGT6/PLA2G4F
Small Intestine	blue	BP	GO:0044282	small molecule catabolic process	HK1/DDAH2/INPP5B/NUDT3/GNPDA2/ADO/FTCD/ACADSB/FOXK1/ABHD1/TWIST1/HOGA1/GCK/INPP5K/HYAL3/GLYATL2/UPB1/ACTN3/MTRR/TKTL1/TDH/ENO1/SDS/PGK1/SCLY/ASRGL1/AFMID/NOS2/ACADVL/ACAT2/GALK1/TXN2/NUDT18/HAL/IDNK/CARNMT1/HSD3B7/HSD17B4/GLB1/SULT1A3/NT5C3A/ACAD10/PGD/GSTZ1/QPRT/OAT/MCCC2/SULT2A1/DECR2/SHMT1/ABHD3/TPI1/HK2/PCK1/PRODH/ENTPD6/SULT1E1/MPST/SDSL/LPIN3/ENTPD7/CYP27A1/OTC/ALDOB/CYP4F2/HAAO/PFKL/CPT2/I…
Small Intestine	blue	BP	GO:0006721	terpenoid metabolic process	RARRES2/CYP27C1/RDH14/ALDH1A3/SCPEP1/FDFT1/APOC2/FDPS/HMGCS2/AKR1C4/NAPEPLD/ABCA4/APOM/APOA4/APOA1/CYP3A4/APOC3/APOB/HMGCS1/SRD5A1/CYP2D6/UGT1A8/ADH1C/RBP2/PLB1/UGT1A1/AKR1B10/CYP2C9/CYP2C19/CYP3A5/CYP2C18/SDC1/AKR1C3/CYP2S1/DGAT1/ADH6
Small Intestine	blue	BP	GO:0042738	exogenous drug catabolic process	CYP2U1/CYP2D7/CYP2W1/CYP3A4/CYP2D6/CYP2C9/CYP2C19/CYP2J2/CYP2C18/CYP2B6/CYP2S1/NR1I2
Small Intestine	blue	BP	GO:0050427	3'-phosphoadenosine 5'-phosphosulfate metabolic process	SULT1A4/SULT1C2/SULT1A3/SULT2A1/SLC35B3/SULT2B1/SULT1E1/SULT1A1/SULT1A2/BPNT1/SULT1B1/PAPSS2
Small Intestine	blue	BP	GO:0046394	carboxylic acid biosynthetic process	HK1/HACD4/GAMT/NUP133/CHST12/ASNSD1/SIRT1/MTAP/MTR/P2RX7/ZBTB20/FADS1/AASDHPPT/ECD/CYP7B1/AAAS/FOXK1/WDTC1/ALDH1A3/ABHD1/PIBF1/RANBP2/HOGA1/FADS2/GCK/UPB1/NUP58/ACTN3/GPX4/MTRR/HPGDS/ENO1/SDS/ABCB11/PGK1/ALOX15B/ASAH2B/NR1H3/XBP1/ACADVL/GALK1/HSD3B7/HSD17B4/APOC2/LIPG/HSD17B8/GCH1/AKR1C4/FGFR4/ELOVL6/APOA4/TECR/OAT/OSBP/CYP3A4/DECR2/SHMT1/ABHD3/MLXIPL/TPI1/GPD1/HK2/APOC3/ELOVL1/CYP2D6/EIF6/EPHX2/…
Small Intestine	blue	BP	GO:0006493	protein O-linked glycosylation	VEGFB/FKRP/TET1/MGAT5B/GALNT9/ST3GAL2/RXYLT1/DPM1/B3GLCT/MUC1/B3GNT2/PGM3/TMTC4/MUC20/MUC4/MUC12/GALNT6/GALNT14/GALNT1/SLC35C1/GCNT3/MUC17/MUC13/GCNT1/MUC3A/B3GNT6/MUC2/GALNT4/GALNT5/B3GNT8/B3GNT7/GALNT3/B3GNT3
Small Intestine	blue	BP	GO:0032869	cellular response to insulin stimulus	RHOQ/ZFP36L1/RELA/RARRES2/GPLD1/PIK3CA/HDAC9/ATP6V1G2/RPS6KB1/ATP6V0E2/HDAC5/SIRT1/GKAP1/NCK1/ATP6V1E2/FOXO1/BGLAP/WDTC1/ATP6V1F/SOCS3/INSRR/CFLAR/ATP6V0E1/GCK/INPP5K/ATP6V1C1/KAT2B/EEF2K/PTPRE/ATP6V0C/ATP6V1A/ATP6AP1/ENHO/PIK3R2/XBP1/GCLC/ATP6V1B2/PCSK9/PPARG/VWA2/RAB8A/PCK1/SRD5A1/PAK1/LPIN3/C1QTNF12/SELENOS/PKLR/CEACAM1/ZBTB7B/PCK2/APOBEC1/NR1H4/ESRRA/BAIAP2L1/PRKCZ
Small Intestine	blue	BP	GO:0016053	organic acid biosynthetic process	HK1/HACD4/GAMT/NUP133/CHST12/ASNSD1/SIRT1/MTAP/MTR/P2RX7/ZBTB20/FADS1/AASDHPPT/ECD/CYP7B1/AAAS/FOXK1/WDTC1/ALDH1A3/ABHD1/PIBF1/RANBP2/HOGA1/FADS2/GCK/UPB1/NUP58/ACTN3/GPX4/MTRR/HPGDS/ENO1/SDS/ABCB11/PGK1/ALOX15B/ASAH2B/NR1H3/XBP1/ACADVL/GALK1/HSD3B7/HSD17B4/APOC2/LIPG/HSD17B8/GCH1/AKR1C4/FGFR4/ELOVL6/APOA4/TECR/OAT/OSBP/CYP3A4/DECR2/SHMT1/ABHD3/MLXIPL/TPI1/GPD1/HK2/APOC3/ELOVL1/CYP2D6/EIF6/EPHX2/…
Small Intestine	blue	BP	GO:0009746	response to hexose	RAB11FIP2/SLC9B2/GPLD1/PIK3CA/WDR35/TGFBR2/EIF2B4/PRKCE/ZBTB20/SIN3A/RHOA/PPP3CA/GYS2/RAB11B/GCK/SIDT2/CTSV/CDK16/PHPT1/KCNJ11/XBP1/TXN2/ACVR1C/ENDOG/GCLC/GCG/APOM/NKX2-2/AACS/MLXIPL/RMI1/PCK1/NR0B2/C2CD2L/SLC2A5/C1QTNF12/HMGCR/PFKL/SELENOS/FOXA2/CASP3/CFTR/SRI/TRPM4/RFX6/NEUROD1/PKLR/KHK/SLC26A6/PCK2/NR1H4/HNF4A/HNF1B
Small Intestine	blue	BP	GO:0034035	purine ribonucleoside bisphosphate metabolic process	SULT1A4/SULT1C2/SULT1A3/SULT2A1/SLC35B3/SULT2B1/SULT1E1/SULT1A1/SULT1A2/BPNT1/SULT1B1/PAPSS2
Small Intestine	blue	BP	GO:0008210	estrogen metabolic process	HSD17B14/HSD17B4/HSD17B8/CYP3A4/HSD3B1/CYP2D6/SULT1E1/HSD17B11/SULT1A1/UGT1A1/CYP2C9/CYP3A5/DHRS11/HSD17B2
Small Intestine	blue	BP	GO:0065005	protein-lipid complex assembly	PRKACB/LCAT/ABCA1/SOAT2/APOC2/APOM/APOA4/APOA1/APOC3/APOB/PLAGL2/P4HB/MTTP/DGAT1
Small Intestine	blue	BP	GO:1901661	quinone metabolic process	CRYZL1/PPTC7/COQ8A/UBIAD1/FDXR/AKR7A2/AKR1C4/COQ4/CYP4F2/HMGCR/AKR1B10/AKR1A1/PDSS1/AKR1C3
Small Intestine	blue	BP	GO:0008206	bile acid metabolic process	SIRT1/CYP7B1/PANK2/ABCB11/HSD3B7/HSD17B4/AKR1C4/FGFR4/OSBP/SULT2A1/GBA2/ATP8B1/CYP27A1/STARD4/MALRD1/SLC27A2/NR1H4/NR5A2
Small Intestine	blue	BP	GO:0051181	cofactor transport	SLC25A32/PPT1/P2RX7/SLC25A29/SLC25A26/FOLR2/SLC19A1/TCN1/SLC33A1/SLC7A11/LCN2/TCN2/SLC25A20/SLC23A1/AMN/FLVCR2/SLC9A3R1/SLC44A4
Small Intestine	blue	BP	GO:0042445	hormone metabolic process	TSPOAP1/CYP27C1/MECP2/ESR1/STUB1/COLQ/HSD17B14/RDH14/CYP21A2/ALDH1A3/REST/SCPEP1/MED1/ASMT/DIO2/LHB/FDXR/PCSK1/HSD17B4/HSD17B8/AKR1C4/DHCR7/APOA1/CYP3A4/HSD3B1/SRD5A1/CYP2D6/SULT1E1/UGT1A8/ADH1C/HSD3B2/MME/CYP27A1/ACE/PLB1/UGT2B7/SHH/ACE2/HSD17B11/SULT1A1/UGT1A1/AKR1B10/ENPEP/CYP2C9/CYP3A5/CYP2C18/HSD11B2/IYD/AKR1C3/ATP1A1/CYP2S1/SULT1B1/DGAT1/ADH6/DHRS11/HSD17B2/SLC44A4/FOXA1/VDR
Small Intestine	blue	BP	GO:0019369	arachidonic acid metabolic process	CYP2U1/PLA2G4C/HPGDS/ALOX15B/CYP2D7/CYP2D6/EPHX2/CYP4F2/CBR1/CYP2C9/CYP2C19/CYP2J2/CYP4F12/CYP2C18/CYP2B6/AKR1C3/CYP2S1/FAAH/PLA2G10
Small Intestine	blue	BP	GO:0006814	sodium ion transport	SLC41A1/SLC9B2/WNK1/ADRB2/PRKCE/P2RX7/SLC38A6/KLHL3/SCN8A/FXYD7/HCN2/SLC9B1/SERPINE2/SLC4A5/SLC38A2/SLC13A4/ATP1A4/HECW2/SLC5A3/COMMD3/SCN4A/SLC13A5/ABCB11/SLC38A10/SLC5A2/SLC3A2/SLC10A7/PCSK9/SLC12A2/PKP2/SLC28A3/ATP1B1/SGK1/WNK4/SLC5A12/TRPM5/HCN3/FXYD3/SLC10A2/SLC5A1/SLC5A9/SLC5A11/CNNM4/TRPM4/SLC9A3/SLC13A2/SLC23A1/P2RX4/SLC9A2/KCNK1/ATP1A1/PRSS8/SLC9A3R1/SLC17A4/PTPN3/SCNN1A
Small Intestine	blue	BP	GO:0006644	phospholipid metabolic process	CD81/INPP4A/GPLD1/INPP5F/PIK3CA/LCAT/CSNK2A2/MTMR9/SOCS5/INPP5B/MECP2/PLD6/PDGFRB/PIP5KL1/FADS1/FIG4/INPPL1/PLA2G4C/PTDSS2/PI4KA/RUFY1/SOCS3/PIK3R4/PI4KB/PIK3C3/DPM1/INPP5K/GPAT2/PI4KAP2/PLD2/GPX4/PLA2G3/GDPD3/GPAA1/PIK3R2/IP6K2/PIGF/MTM1/MVD/PNPLA3/PLA2G2A/CPNE7/FDFT1/SPTLC2/PLBD1/IDI1/APOC2/FDPS/LIPG/HMGCS2/PCSK9/ETNK1/NAPEPLD/SH3YL1/APOA4/APOA1/PNLIPRP2/LPCAT4/ABHD3/DBI/GPD1/PGAP2/HMGCS1/MBOAT…
Small Intestine	blue	BP	GO:0019627	urea metabolic process	NMRAL1/OTC/CPS1/CEBPA/ASL/CYP2C9/NR1H4/NAGS
Small Intestine	blue	BP	GO:0051923	sulfation	CHSY1/SULT1C2/SULT1A3/SULT2A1/SULT1E1/SULT1A1/SULT1A2/CHST5/SULT1B1
Small Intestine	blue	BP	GO:0070293	renal absorption	KLHL3/SGK1/WNK4/AQP3/AKR1C3/KCNQ1/CLDN4/SLC9A3R1/HNF1A
Small Intestine	blue	BP	GO:0009749	response to glucose	RAB11FIP2/SLC9B2/GPLD1/PIK3CA/WDR35/TGFBR2/EIF2B4/PRKCE/ZBTB20/SIN3A/RHOA/PPP3CA/GYS2/RAB11B/GCK/SIDT2/CTSV/CDK16/PHPT1/KCNJ11/XBP1/TXN2/ACVR1C/ENDOG/GCLC/GCG/APOM/NKX2-2/AACS/MLXIPL/RMI1/PCK1/NR0B2/C2CD2L/C1QTNF12/HMGCR/PFKL/SELENOS/FOXA2/CASP3/CFTR/SRI/TRPM4/RFX6/NEUROD1/PKLR/KHK/PCK2/NR1H4/HNF4A/HNF1B
Small Intestine	blue	BP	GO:0034284	response to monosaccharide	RAB11FIP2/SLC9B2/GPLD1/PIK3CA/WDR35/TGFBR2/EIF2B4/PRKCE/ZBTB20/SIN3A/RHOA/PPP3CA/GYS2/RAB11B/GCK/SIDT2/CTSV/CDK16/PHPT1/KCNJ11/XBP1/TXN2/ACVR1C/ENDOG/GCLC/GCG/APOM/NKX2-2/AACS/MLXIPL/RMI1/PCK1/NR0B2/C2CD2L/SLC2A5/C1QTNF12/HMGCR/PFKL/SELENOS/FOXA2/CASP3/CFTR/SRI/TRPM4/RFX6/NEUROD1/PKLR/KHK/SLC26A6/PCK2/NR1H4/HNF4A/HNF1B
Small Intestine	blue	BP	GO:0045604	regulation of epidermal cell differentiation	ZFP36L1/PTCH2/ROCK1/TP63/NUMA1/MED1/ALOX15B/CTSV/REG3G/REG3A/SULT2B1/MYCL/AQP3/SFN/MACROH2A1/ATOH1/ESRP1/KDF1/GRHL2/VDR/OVOL2
Small Intestine	blue	BP	GO:0044242	cellular lipid catabolic process	GPLD1/INPP5F/PPT1/PLA2G4C/ABHD1/SPHK1/TWIST1/GLYATL2/GDPD3/GLA/ASAH2B/ACADVL/ACAT2/PNPLA3/HSD17B4/APOC2/FUCA1/LIPG/ACAD10/NAPEPLD/APOA4/APOA1/PNLIPRP2/DECR2/ABHD3/FABP6/APOC3/APOB/PCK1/GBA2/LPIN3/AADAC/CYP4F2/CPS1/CPT2/NEU4/IDH1/AKR1B10/DECR1/ACBD5/ACADS/FABP2/FABP1/CYP4F3/CYP4F12/AKR1C3/GBA3/PDXDC1/PCK2/SMPD3/FAAH/SLC27A2/ADTRP/SMPDL3B/PLA2G4F
Small Intestine	blue	BP	GO:0031016	pancreas development	GDF11/FOXO1/DNAAF1/IL6/SIDT2/MSLN/XBP1/NEUROG3/INSM1/PAX4/ISL1/NKX2-2/SOX9/SHH/FOXA2/RFX6/NEUROD1/GATA6/BAK1/IHH/MNX1/HNF4A/HNF1A/HNF1B/NR5A2
Small Intestine	blue	BP	GO:0032868	response to insulin	RHOQ/ZFP36L1/RELA/RARRES2/GPLD1/PIK3CA/HDAC9/ATP6V1G2/RPS6KB1/ATP6V0E2/HDAC5/SIRT1/GKAP1/NCK1/ATP6V1E2/INPPL1/FOXO1/BGLAP/EGR2/WDTC1/ATP6V1F/SOCS3/INSRR/CFLAR/ATP6V0E1/SRSF4/GCK/INPP5K/ATP6V1C1/KAT2B/EEF2K/PTPRE/ATP6V0C/ATP6V1A/ATP6AP1/ENHO/PIK3R2/TNFSF10/XBP1/ACVR1C/GCLC/ATP6V1B2/PCSK9/PPARG/VWA2/RAB8A/PCK1/SRD5A1/PAK1/EIF6/LPIN3/OTC/C1QTNF12/SELENOS/PKLR/CEACAM1/KHK/ZBTB7B/GCNT1/HSD11B2/PCK2/AP…
Small Intestine	blue	CC	GO:0045177	apical part of cell	GNAS/SLC9B2/SEPTIN7/WDPCP/PCM1/ADRB2/MAL/NEDD1/PDGFRB/SLC26A4/PARD6A/NOD1/HOMER1/TF/ATP7A/VASH1/IFIT5/SLC4A5/ATP6V1C1/AQP5/OTOA/MUC1/SLC19A1/ABCB11/PKHD1/GPR143/ATP6V1A/CTSV/UPK3A/SLC3A2/PROM2/MGST1/ATP6V1B2/SLC12A2/MUC20/CPO/LCT/ATP1B1/CEACAM6/SLC39A4/ABCC2/SLC5A12/PROM1/CEACAM5/ATP8B1/SLC7A9/MGAM/C2CD2L/PLB1/NAALADL1/SLC6A19/SLC2A5/CYP4F2/SLC26A3/ERBB3/SLC10A2/SLC5A1/CFTR/CEACAM20/STX3/PDZK1/ER…
Small Intestine	blue	CC	GO:0016324	apical plasma membrane	GNAS/SLC9B2/SEPTIN7/WDPCP/ADRB2/MAL/PDGFRB/SLC26A4/PARD6A/NOD1/TF/ATP7A/SLC4A5/AQP5/OTOA/MUC1/SLC19A1/PKHD1/GPR143/ATP6V1A/UPK3A/SLC3A2/PROM2/ATP6V1B2/SLC12A2/MUC20/CPO/LCT/ATP1B1/CEACAM6/SLC39A4/ABCC2/SLC5A12/PROM1/CEACAM5/ATP8B1/SLC7A9/MGAM/C2CD2L/PLB1/NAALADL1/SLC6A19/SLC2A5/CYP4F2/SLC26A3/ERBB3/SLC10A2/SLC5A1/CFTR/CEACAM20/STX3/PDZK1/ERBB2/SLC2A2/SHROOM1/SLC9A3/CDHR5/SI/SLC1A1/ABCB1/ENPEP/SLC…
Small Intestine	blue	CC	GO:0005903	brush border	SLC26A4/ATP7A/MYH9/SLC38A2/FLII/SLC7A11/SOAT2/LIMA1/ITLN1/ABCC2/SLC15A1/ATP8B1/SLC7A9/MME/PLB1/SLC6A19/SLC26A3/ACE2/SLC5A1/PDZK1/SLC2A2/SLC9A3/CDHR5/SI/ENPEP/CDHR2/SLC3A1/AMN/SLC26A6/MYO1A/PDZD3/KCNK1/MYO7B/SCIN/SLC9A3R1/VIL1/PLS1/MYH14/ESPN/MYO1D/USH1C/ANKS4B
Small Intestine	blue	CC	GO:0005902	microvillus	ATP7A/BBS2/AQP5/ATP6V1A/CTSV/CA9/PROM2/ATP6V1B2/MUC20/PROM1/SLC10A2/CLCA1/KIF13B/CEACAM20/PDZK1/STARD10/MYO6/IQGAP2/CDHR5/DPEP1/CDHR2/CEACAM1/MYO1A/MYO7B/PTPRH/SLC9A3R1/PLEKHG6/VIL1/ESPN/USH1C/FOXA1/ANKS4B
Small Intestine	blue	CC	GO:0031253	cell projection membrane	PLEKHO1/MACF1/SLC39A6/KCNA2/CLASP2/BBS4/EEF1A1/BBS9/ASAP1/EFCAB7/MTMR9/TCTN2/SEPTIN2/ATF4/PDE4A/SLC26A4/GRIA1/MOSMO/ARPC2/ATP7A/RHOA/BBS2/SLC1A2/PKD1L1/IFIT5/LAMP5/OPRD1/MCHR1/INPP5K/PSD2/RAB35/VASP/CNGA4/GUCA1A/CNTNAP2/GRK1/FZD9/CA9/KCNJ11/NOX1/HLA-G/SLC7A11/PROM2/REG1A/GABRE/NAPEPLD/ABCA4/LIMA1/TRPV1/SH3YL1/MUC20/ITLN1/CDHR1/CFL1/PAK1/ABCC2/FERMT1/PROM1/ATP8B1/SLC7A9/PLB1/MYO10/SLC6A19/SLC26A3/…
Small Intestine	blue	CC	GO:0098862	cluster of actin-based cell projections	SLC26A4/MYO15A/ATP7A/BBS2/MYH9/CDH23/SLC38A2/FLII/SLC7A11/SOAT2/TRPA1/LIMA1/ITLN1/ABCC2/SLC15A1/ATP8B1/SLC7A9/MME/PLB1/SLC6A19/SLC26A3/ACE2/SLC5A1/PDZK1/SLC2A2/SLC9A3/CDHR5/SI/ENPEP/CDHR2/SLC3A1/AMN/SLC26A6/MYO1A/PDZD3/KCNK1/MYO7B/SCIN/SLC9A3R1/VIL1/PLS1/EPS8L2/MYH14/ESPN/MYO1D/USH1C/ANKS4B/TPRN
Small Intestine	blue	CC	GO:0031526	brush border membrane	SLC26A4/ATP7A/SLC7A11/LIMA1/ITLN1/ABCC2/ATP8B1/SLC7A9/PLB1/SLC6A19/SLC26A3/ACE2/SLC5A1/PDZK1/SLC9A3/CDHR5/CDHR2/SLC3A1/AMN/SLC26A6/KCNK1/SLC9A3R1
Small Intestine	blue	CC	GO:0044450	microtubule organizing center part	TTBK2/KIF3A/MDM1/CCDC88A/CDK5RAP2/PCM1/BBS4/BBS9/CLASP1/CCDC66/ROCK1/TUBE1/NEDD1/CEP290/TUBD1/FLOT1/PARD6A/ALMS1/CEP162/CEP19/EXOC7/RTTN/CCDC146/FTCD/AHI1/KIAA0586/CEP83/SAXO2/MZT2B/TCP10L/SDCCAG8/PIBF1/CNTROB/FOPNL/CETN3/CEP295/TSKS/TCP1/TUBGCP5/CBY3/PCNT/CEP104/NUBP1/PLA2G3/KIF24/POC1B/RAB8A/KRT18/CCDC120/CCDC68/ALDOB
Small Intestine	blue	CC	GO:0031528	microvillus membrane	CA9/PROM2/MUC20/PROM1/CEACAM20/PDZK1/CDHR5/DPEP1/CDHR2/CEACAM1/PTPRH/SLC9A3R1
Small Intestine	blue	CC	GO:0034451	centriolar satellite	PCM1/BBS4/BBS9/CCDC66/CEP290/FLOT1/PARD6A/EXOC7/SDCCAG8/PIBF1/FOPNL/PCNT/KRT18/ALDOB
Small Intestine	blue	CC	GO:0005666	RNA polymerase III complex	POLR3F/POLR3D/POLR2F/POLR3H/POLR3G/POLR3E/POLR3C/POLR2E/POLR2H
Small Intestine	blue	MF	GO:0008514	organic anion transmembrane transporter activity	SLC25A32/SLC36A4/SLCO3A1/SLC38A6/SLC26A4/SLC43A1/SLC25A29/SLC16A7/SLC1A2/SLC16A14/SLC4A5/SLC38A2/SLC13A4/SLC25A14/SLCO5A1/SLC13A5/SLC16A3/SLC19A1/ABCB11/SLC6A14/SLC38A10/SLC33A1/SLC7A11/SLC3A2/SLC10A7/SLC16A10/AKR1C4/SLC43A2/SLC35B3/SLC66A1/SLC52A2/SFXN5/ABCC2/SLC5A12/MFSD2A/ATP8B1/SLC7A9/SLC6A19/SLC26A3/SLC10A2/CFTR/SLC2A2/SLC25A1/SLC13A2/SLC1A1/SLC23A1/SLC3A1/SLC52A3/CEACAM1/SLC25A24/SLC35B1/SL…
Small Intestine	blue	MF	GO:0022804	active transmembrane transporter activity	SLC41A1/SLC9B2/ABCA3/ATP6V1G2/ATP6V0E2/ANXA5/SLC36A4/SLCO3A1/ABCA1/SLC26A4/ATP6V1E2/ATP7A/SLC9B1/SLC16A7/ATP6V1F/SLC1A2/ATP6V0E1/SLC16A14/SLC35E3/SLC4A5/SLC38A2/SLC13A4/ATP6V1C1/ATP1A4/TIMM23B/ATP5F1E/SLC25A14/SLC5A3/SLCO5A1/SLC13A5/SLC16A3/SLC19A1/ABCB11/ATP6V0C/SLC6A14/ATP6V1A/ATP6AP1/SLC33A1/SLC7A11/SLC5A2/ABCA13/SLC3A2/SLC10A7/SLC16A10/ATP6V1B2/SLC12A2/ANKH/ABCA4/CLCN3/SLC12A7/SLC28A2/SLC28A3…
Small Intestine	blue	MF	GO:0005342	organic acid transmembrane transporter activity	SLC25A32/SLC36A4/SLC38A6/SLC26A4/SLC43A1/SLC25A29/SLC16A7/SLC1A2/SLC16A14/SLC38A2/SLC13A4/SLC25A14/SLC13A5/SLC16A3/SLC19A1/ABCB11/SLC6A14/SLC38A10/SLC7A11/SLC3A2/SLC10A7/SLC16A10/AKR1C4/SLC43A2/SLC66A1/SFXN5/ABCC2/SLC5A12/MFSD2A/SLC7A9/SLC6A19/SLC26A3/SLC10A2/SLC25A1/SLC13A2/SLC1A1/SLC23A1/SLC3A1/CEACAM1/SLC36A1/SLC25A10/SLC26A6/SLC51A/SLC16A5/SLC51B/SLC6A20/SLC27A2/SLC6A7/SLC17A4
Small Intestine	blue	MF	GO:0046943	carboxylic acid transmembrane transporter activity	SLC25A32/SLC36A4/SLC38A6/SLC26A4/SLC43A1/SLC25A29/SLC16A7/SLC1A2/SLC16A14/SLC38A2/SLC13A4/SLC25A14/SLC13A5/SLC16A3/SLC19A1/ABCB11/SLC6A14/SLC38A10/SLC7A11/SLC3A2/SLC10A7/SLC16A10/AKR1C4/SLC43A2/SLC66A1/SFXN5/ABCC2/SLC5A12/MFSD2A/SLC7A9/SLC6A19/SLC26A3/SLC10A2/SLC25A1/SLC13A2/SLC1A1/SLC23A1/SLC3A1/CEACAM1/SLC36A1/SLC25A10/SLC26A6/SLC51A/SLC16A5/SLC51B/SLC6A20/SLC27A2/SLC6A7/SLC17A4
Small Intestine	blue	MF	GO:0008238	exopeptidase activity	SCRN1/MMP17/AEBP1/PM20D2/XPNPEP3/PRCP/AGBL3/VASH1/NPEPL1/SCPEP1/CPZ/CNDP1/ASRGL1/CTSV/SCRN2/CPA2/F11/ERAP1/CTSA/CPO/PREP/DPP3/XPNPEP2/MME/ACE/NAALADL1/ACE2/GGT1/PGPEP1/MMP15/ANPEP/ENPEP/DPEP1/XPNPEP1/CNDP2/GGT6/DPP4/PRSS16/RNPEP
Small Intestine	blue	MF	GO:0015291	secondary active transmembrane transporter activity	SLC41A1/SLC9B2/SLC36A4/SLCO3A1/SLC26A4/SLC9B1/SLC16A7/SLC1A2/SLC16A14/SLC35E3/SLC4A5/SLC38A2/SLC13A4/SLC25A14/SLC5A3/SLCO5A1/SLC13A5/SLC16A3/SLC19A1/SLC6A14/SLC33A1/SLC7A11/SLC5A2/SLC3A2/SLC10A7/SLC16A10/SLC12A2/ANKH/CLCN3/SLC12A7/SLC28A2/SLC28A3/LETM1/SLC5A12/MFSD2A/SLC15A1/MFSD3/SLC28A1/SLC18A1/SLC6A19/SLC26A3/SLC10A2/SLC12A8/SLC5A1/SLC5A9/SLC5A11/SLC6A4/SLC35C1/SLC9A3/SLC25A1/SLC13A2/SLC1A1/SL…
Small Intestine	blue	MF	GO:0008509	anion transmembrane transporter activity	SLC25A32/SLC36A4/SLCO3A1/SLC38A6/ABCA1/SLC26A4/SLC43A1/SLC25A29/SLC16A7/SLC1A2/SLC16A14/SLC4A5/SLC38A2/SLC13A4/SLC25A14/SLCO5A1/SLC13A5/SLC16A3/SLC19A1/ABCB11/SLC6A14/SLC38A10/SLC33A1/SLC7A11/SLC3A2/CLCN1/SLC10A7/SLC16A10/GABRE/AKR1C4/SLC43A2/SLC12A2/ANKH/CLCN3/SLC12A7/SLC35B3/SLC66A1/SLC52A2/SFXN5/ABCC2/VDAC1/SLC5A12/MFSD2A/ATP8B1/SLC7A9/BEST2/SLC18A1/SLC6A19/FXYD3/SLC26A3/SLC10A2/SLC12A8/BEST4/…
Small Intestine	blue	MF	GO:0004177	aminopeptidase activity	MMP17/XPNPEP3/PRCP/NPEPL1/CTSV/F11/ERAP1/DPP3/XPNPEP2/ACE/NAALADL1/MMP15/ANPEP/ENPEP/DPEP1/XPNPEP1/DPP4/PRSS16/RNPEP
Small Intestine	blue	MF	GO:0015370	solute:sodium symporter activity	SLC1A2/SLC4A5/SLC13A4/SLC5A3/SLC13A5/SLC6A14/SLC5A2/SLC12A2/SLC28A2/SLC28A3/SLC5A12/SLC28A1/SLC18A1/SLC6A19/SLC10A2/SLC5A1/SLC5A9/SLC5A11/SLC6A4/SLC13A2/SLC1A1/SLC23A1/SLC6A20/SLC6A7/SLC17A4
Small Intestine	blue	MF	GO:1901682	sulfur compound transmembrane transporter activity	SLC26A4/SLC25A26/SLC13A4/SLC25A14/SLC33A1/SLC7A11/SLC19A3/SLC35B3/SLC7A9/SLC26A3/SLC1A1/SLC3A1/SLC25A10/SLC26A6/SLC44A4
Small Intestine	green	BP	GO:0044242	cellular lipid catabolic process	SMPD4/ABCD2/AKT2/IVD/GCDH/BDH2/LIPC/PEX2/GBA/AMACR/PLA2G4E/LIPE/NEU1/SCARB1/PLA2G4D/ACER3/GALC/NAGA/DAGLA/BCO1/ACADM/FABP7/SCP2/ABCD3/APOA5/CYP4A11/NUDT19/HADHB/HADHA/CROT/ABHD12/SESN2/HACL1/ASAH2/PNPLA2/HAO2/ACOX1/PECR/GDPD1/SLC27A4/PPARA/ENPP7/PNPLA1/ACOT8/ABHD6/ABCD1
Small Intestine	green	BP	GO:0007031	peroxisome organization	MPV17/UBE2D2/CAT/AGXT/PEX2/AMACR/DHRS4/TMEM135/BAAT/SCP2/ABCD3/NUDT19/PEX11G/ACOT4/SEC16B/CRYZL2P-SEC16B/CROT/HACL1/HAO2/ACOX1/PECR/ACOT8/ABCD1/PEX26
Small Intestine	green	BP	GO:0072329	monocarboxylic acid catabolic process	ABCD2/AKT2/IVD/GCDH/BDH2/AGXT/PEX2/AMACR/LIPE/PON3/ACADM/SCP2/ABCD3/CYP4A11/NUDT19/HADHB/XYLB/HADHA/CROT/SESN2/HACL1/AGXT2/HAO2/ACOX1/PECR/SLC27A4/PPARA/ACOT8/ABCD1
Small Intestine	green	BP	GO:0019395	fatty acid oxidation	ABCD2/AKT2/IVD/GCDH/BDH2/PEX2/AMACR/ACADM/CYP4V2/SCP2/ABCD3/HADHB/HADHA/CROT/SESN2/HACL1/HAO2/ACOX1/PECR/APPL2/PPARA/POR/ACOT8/ABCD1
Small Intestine	green	BP	GO:0009062	fatty acid catabolic process	ABCD2/AKT2/IVD/GCDH/BDH2/PEX2/AMACR/LIPE/ACADM/SCP2/ABCD3/CYP4A11/NUDT19/HADHB/HADHA/CROT/SESN2/HACL1/HAO2/ACOX1/PECR/SLC27A4/PPARA/ACOT8/ABCD1
Small Intestine	green	BP	GO:0016042	lipid catabolic process	SMPD4/SNX17/LRCOL1/ABCD2/AKT2/IVD/TBL1XR1/GCDH/BDH2/LIPC/PEX2/GBA/AMACR/PLA2G4E/LIPE/NEU1/SCARB1/PLA2G4D/ACER3/GALC/NAGA/DAGLA/BCO1/SCT/ACADM/FABP7/SCP2/ABCD3/APOA5/CYP4A11/NUDT19/HADHB/HADHA/CROT/ABHD12/SESN2/HACL1/ASAH2/PNPLA2/HAO2/ACOX1/PECR/GDPD1/PAFAH2/SLC27A4/PPARA/ENPP7/PNPLA1/ACOT8/ABHD6/ABCD1
Small Intestine	green	BP	GO:0034440	lipid oxidation	ABCD2/AKT2/IVD/GCDH/BDH2/PEX2/AMACR/ACADM/CYP4V2/SCP2/ABCD3/HADHB/HADHA/CROT/SESN2/HACL1/HAO2/ACOX1/PECR/APPL2/PPARA/POR/ACOT8/ABCD1
Small Intestine	green	BP	GO:0006631	fatty acid metabolic process	PTGES3/PTGES/C3/MYO5A/GPX1/ABCD2/LTA4H/AKT2/IVD/GCDH/UCP3/BDH2/PON1/INSIG1/LIPC/CYP2A7/PEX2/AMACR/INSIG2/LIPE/AKR1C2/PON3/PLA2G4D/DAGLA/CYP4F11/PDP2/HACD2/ACADM/BAAT/MAPK3/CYP4V2/SCP2/ABCD3/APOA5/CYP4A11/NUDT19/ACOT4/HADHB/SCAP/ACOT12/HADHA/CROT/SESN2/HACL1/ASAH2/HAO2/ACOX1/PECR/APPL2/SLC27A4/ACOT11/PPARA/POR/LPGAT1/ACOT8/ABCD1
Small Intestine	green	BP	GO:0043574	peroxisomal transport	MPV17/UBE2D2/CAT/AGXT/PEX2/AMACR/DHRS4/BAAT/SCP2/NUDT19/ACOT4/CROT/HACL1/HAO2/ACOX1/PECR/ACOT8/ABCD1/PEX26
Small Intestine	green	BP	GO:0006625	protein targeting to peroxisome	MPV17/UBE2D2/CAT/AGXT/PEX2/AMACR/DHRS4/BAAT/SCP2/NUDT19/ACOT4/CROT/HACL1/HAO2/ACOX1/PECR/ACOT8/PEX26
Small Intestine	green	BP	GO:0072662	protein localization to peroxisome	MPV17/UBE2D2/CAT/AGXT/PEX2/AMACR/DHRS4/BAAT/SCP2/NUDT19/ACOT4/CROT/HACL1/HAO2/ACOX1/PECR/ACOT8/PEX26
Small Intestine	green	BP	GO:0072663	establishment of protein localization to peroxisome	MPV17/UBE2D2/CAT/AGXT/PEX2/AMACR/DHRS4/BAAT/SCP2/NUDT19/ACOT4/CROT/HACL1/HAO2/ACOX1/PECR/ACOT8/PEX26
Small Intestine	green	BP	GO:0006635	fatty acid beta-oxidation	ABCD2/AKT2/IVD/GCDH/BDH2/PEX2/AMACR/ACADM/SCP2/ABCD3/HADHB/HADHA/CROT/SESN2/ACOX1/PPARA/ACOT8/ABCD1
Small Intestine	green	BP	GO:0044282	small molecule catabolic process	ENTPD1/ENO2/SNX17/PPAT/ABCD2/AKT2/CARNS1/IVD/GCDH/RENBP/BDH2/GLUD1/PON1/AGXT/PEX2/AMACR/LIPE/ALDH3B1/PON3/SCARB1/FUT5/CYP4F11/ACADM/MTHFS/GPD2/OXCT2/CHP1/SCP2/ABCD3/CYP4A11/NUDT19/PNKD/ACOT4/HADHB/XYLB/HADHA/CROT/DERA/NUDT16/CDA/SESN2/HACL1/AGXT2/TAT/ALDOC/HAO2/ACOX1/PECR/SLC9A1/SLC27A4/PPARA/RBKS/ACOT8/GK/ENTPD5/DHDH/ABCD1/PDXP
Small Intestine	green	BP	GO:0016054	organic acid catabolic process	PPAT/ABCD2/AKT2/CARNS1/IVD/GCDH/RENBP/BDH2/GLUD1/PON1/AGXT/PEX2/AMACR/LIPE/PON3/ACADM/MTHFS/CHP1/SCP2/ABCD3/CYP4A11/NUDT19/ACOT4/HADHB/XYLB/HADHA/CROT/SESN2/HACL1/AGXT2/TAT/HAO2/ACOX1/PECR/SLC9A1/SLC27A4/PPARA/ACOT8/ABCD1
Small Intestine	green	BP	GO:0046395	carboxylic acid catabolic process	PPAT/ABCD2/AKT2/CARNS1/IVD/GCDH/RENBP/BDH2/GLUD1/PON1/AGXT/PEX2/AMACR/LIPE/PON3/ACADM/MTHFS/CHP1/SCP2/ABCD3/CYP4A11/NUDT19/ACOT4/HADHB/XYLB/HADHA/CROT/SESN2/HACL1/AGXT2/TAT/HAO2/ACOX1/PECR/SLC9A1/SLC27A4/PPARA/ACOT8/ABCD1
Small Intestine	green	BP	GO:0006066	alcohol metabolic process	ADH1B/CH25H/ISYNA1/KPNB1/SNX17/BMP2/PON1/CAT/INSIG1/SP1/LIPC/GBA/DISP3/TTR/INSIG2/LIPE/ALDH3B1/AKR1C2/SCARB1/MVK/ACER3/MINPP1/BCO1/DHRS4/GPD2/DHRS9/AKR1B15/RDH5/APOA5/NSDHL/SCAP/RDH13/ITPK1/IPMK/ASAH2/CHKA/PECR/CUBN/GDPD1/DHDDS/PCBD2/CLCN2/SEC14L2/POR/GK/RETSAT/TTC39B
Small Intestine	green	BP	GO:0015711	organic anion transport	SLC25A30/PITPNC1/ATP8B2/ATP10A/AKT2/CYB5RL/SLC38A1/SLC35A1/SLC38A4/ATP11A/SLC16A9/SLCO4C1/AGXT/SLC26A8/SLC5A8/SLC6A12/SLC16A4/ABCC11/SCARB1/SLC7A1/SLC10A1/CA1/OXT/ABCC5/NCOR1/SLC22A13/PPFIA1/SLC17A1/SCP2/ABCD3/STK39/GLTP/APOA5/SLC26A2/CYP4A11/SLC17A5/CROT/SLC4A7/SLC25A13/SLC25A15/CASR/PSEN1/CA3/PITPNA/SLC35A3/SLC6A13/SLC27A4/PPARA/GLTPD2/SLC35D1/SLC25A5/SLC13A1/CA13/OSBPL2/ABCD1/SLC26A1/SLC17A8
Small Intestine	green	BP	GO:0006732	coenzyme metabolic process	LDHB/ENO2/MTHFD2/ACBD6/MTHFD1L/NUP188/NUP98/RAE1/NUP42/GCDH/SLC5A8/RFK/MVK/BST1/NCOR1/CYP4F11/PDP2/HACD2/MTHFS/BAAT/GPD2/SLC22A13/AHCYL2/PANK1/CYB5A/ACOT4/ACOT12/CROT/DERA/ASPDH/BTD/PC/SUCLG1/ALDOC/PSEN1/FMO1/PDXK/PCBD2/ACOT11/PPARA/PANK3/ME2/SLC25A16/VNN1/RBKS/ACOT8/ENTPD5/ABCD1/PDXP
Small Intestine	green	BP	GO:0042254	ribosome biogenesis	RIOX2/EIF2A/RSL1D1/RPF1/SNU13/TRMT112/PWP1/XRN2/RPL10/RPP30/RBFA/RPS24/RIOK1/RPS16/NPM1/RPL3/LTV1/MPHOSPH10/PELP1/NOC2L/EXOSC1/DHX30/NGDN/GEMIN4/FTSJ3/TFB1M/WBP11/EXOSC3/SART1/EXOSC7/MRM2/UTP25/DIS3/RRP7A/NOL9/ZNF622/NUDT16/DDX52/RIOK3
Small Intestine	green	BP	GO:0046503	glycerolipid catabolic process	SMPD4/LIPC/PLA2G4E/LIPE/SCARB1/PLA2G4D/DAGLA/FABP7/APOA5/ABHD12/PNPLA2/GDPD1/PNPLA1/ABHD6
Small Intestine	green	BP	GO:0010256	endomembrane system organization	ANXA6/SRGN/BIN1/PLSCR3/ATP8B2/LRRK2/PLEKHF1/DMKN/PARP11/VPS11/LYST/ABCD2/AKT2/FBXW8/SUN2/MAP2K1/TJAP1/TMED5/TMED1/RAB27A/GOLGB1/PPP2R2A/TMEM33/EPB41L3/DNAJC28/AGFG1/GORASP1/SHTN1/PDE4DIP/CHMP1B/MAPK3/SYT7/NDRG1/CHMP6/SPAST/TLCD2/SEC16B/CRYZL2P-SEC16B/KIFC3/MPP5/ARFGEF1/FHDC1/RILP/TOR1AIP2/CSNK1D/AKAP9/GBF1/CHMP1A/AQP11/OSBPL2/ABCD1/GET4
Small Intestine	green	BP	GO:0030258	lipid modification	PIP4K2B/GBGT1/ABCD2/AKT2/IVD/GCDH/BDH2/PEX2/GBA/AMACR/CYP4A22/ACADM/CYP3A7/CYP4V2/SCP2/ABCD3/B4GALNT2/APOA5/HADHB/HADHA/CROT/SESN2/PIK3C2G/HACL1/HAO2/ACOX1/PIP4K2C/PECR/APPL2/PPARA/POR/ACOT8/ABCD1
Small Intestine	green	BP	GO:0016358	dendrite development	SRGAP2/LRRK2/MEF2C/TIAM1/FBXW8/ARHGAP33/SYNGAP1/LRP4/MATN2/TAOK2/STRN/TRAPPC4/NCK2/NSMF/GRIN1/DYNLT1/GORASP1/EFNA1/GSK3B/PTPRD/CDK5/COBL/SIPA1L1/TNIK/PAK4/NEDD4L/PSEN1/ZMYND8/CHRNA7/TRAK1/MAPK6/DAB1
Small Intestine	green	BP	GO:0010921	regulation of phosphatase activity	FKBP1A/HSP90AB1/GNAI2/SET/MEF2C/MPHOSPH10/TMEM225B/PCIF1/PPP1R2/JAK2/CABIN1/BMP2/TMEM132D/ITGA2/PHACTR3/PHACTR4/PPP2R2A/SYTL2/PPP1R36/GSK3B/CHP1/DLG3/PPP2R1B/PPP2R5D/CNST/LMTK2
Small Intestine	green	BP	GO:0046394	carboxylic acid biosynthetic process	BGN/PTGES3/CHST14/DSE/PTGES/CH25H/ENO2/PYCR2/MTHFD1L/NUP188/MYO5A/ABCD2/LTA4H/CARNS1/NUP98/RAE1/NUP42/GLUD1/INSIG1/AGXT/LIPC/AMACR/FGF19/INSIG2/GATM/UGDH/ABCC5/NCOR1/HACD2/MTHFS/BAAT/DHRS9/GGT3P/SCP2/ABCD3/GGT2/APOA5/ACOT4/SCAP/ACOT12/AGXT2/ASAH2/ALDOC/PSEN1/PECR/ACOT11/PPARA/SLC35D1/LPGAT1/ACOT8/ENTPD5/OSBPL2/ABCD1
Small Intestine	green	BP	GO:0034308	primary alcohol metabolic process	ADH1B/BMP2/TTR/ALDH3B1/AKR1C2/BCO1/GPD2/DHRS9/AKR1B15/RDH5/RDH13/CHKA/PECR/GDPD1/CLCN2/RETSAT
Small Intestine	green	BP	GO:0016053	organic acid biosynthetic process	BGN/PTGES3/CHST14/DSE/PTGES/CH25H/ENO2/PYCR2/MTHFD1L/NUP188/MYO5A/ABCD2/LTA4H/CARNS1/NUP98/RAE1/NUP42/GLUD1/INSIG1/AGXT/LIPC/AMACR/FGF19/INSIG2/GATM/UGDH/ABCC5/NCOR1/HACD2/MTHFS/BAAT/DHRS9/GGT3P/SCP2/ABCD3/GGT2/APOA5/ACOT4/SCAP/ACOT12/AGXT2/ASAH2/ALDOC/PSEN1/PECR/ACOT11/PPARA/SLC35D1/LPGAT1/ACOT8/ENTPD5/OSBPL2/ABCD1
Small Intestine	green	BP	GO:0046434	organophosphate catabolic process	ENO2/DUT/SMPD4/NEIL2/NUP188/GPX1/NUP98/RAE1/NUP42/PDE8A/PON1/LIPC/PLA2G4E/SCARB1/PLA2G4D/NCOR1/GPD2/OGG1/ENPP3/ABHD12/DERA/NUDT16/ASPDH/ALDOC/PSEN1/GDPD1/PDE9A/PPARA/ENPP7/ABHD6/ENTPD5/ABCD1/PDXP
Small Intestine	green	BP	GO:0006605	protein targeting	SPCS3/LARS1/RPL22/SRP9/MPV17/RPL4/RPL10/RPS24/RPS16/RPL3/LRRK2/RPL8/UBE2D2/ITGAM/ZDHHC2/SRPRA/VPS11/BAP1/AKT2/TRAM1/CAT/ZDHHC7/AGXT/ZDHHC20/TAOK2/PEX2/RN7SL3/AMACR/HPCA/RAB27A/ZDHHC3/SAMM50/DHRS4/BAAT/CHP1/SCP2/CDK5/NUDT19/ACOT4/CROT/HACL1/HAO2/ACOX1/PECR/ERBIN/VPS13A/ACOT8/TRAK1/GOSR2/PEX26
Small Intestine	green	BP	GO:0035303	regulation of dephosphorylation	FKBP1A/HSP90AB1/GNAI2/SET/MEF2C/MPHOSPH10/TMEM225B/PCIF1/PPP1R2/JAK2/CABIN1/BMP2/TMEM132D/GBA/ITGA2/PHACTR3/PHACTR4/PPP2R2A/SYTL2/NSMF/PPP1R36/GSK3B/CHP1/DLG3/PPP2R1B/SRC/PPP2R5D/CNST/LMTK2
Small Intestine	green	CC	GO:0044438	microbody part	IMPDH2/MPV17/ABCD2/CAT/AGXT/PEX2/AMACR/DHRS4/TMEM135/BAAT/SYT7/SCP2/ABCD3/NUDT19/PEX11G/ACOT4/CROT/PXMP2/HACL1/HAO2/ACOX1/PECR/ACOT8/ABCD1/PEX26
Small Intestine	green	CC	GO:0044439	peroxisomal part	IMPDH2/MPV17/ABCD2/CAT/AGXT/PEX2/AMACR/DHRS4/TMEM135/BAAT/SYT7/SCP2/ABCD3/NUDT19/PEX11G/ACOT4/CROT/PXMP2/HACL1/HAO2/ACOX1/PECR/ACOT8/ABCD1/PEX26
Small Intestine	green	CC	GO:0005777	peroxisome	IMPDH2/MPV17/MYO5A/ABCD2/CAT/AGXT/PEX2/AMACR/MVK/MARC2/DHRS4/TMEM135/BAAT/SYT7/SCP2/ABCD3/NUDT19/PEX11G/ACOT4/CROT/PXMP2/HACL1/HAO2/ACOX1/PECR/GBF1/ACOT8/ABCD1/PEX26
Small Intestine	green	CC	GO:0042579	microbody	IMPDH2/MPV17/MYO5A/ABCD2/CAT/AGXT/PEX2/AMACR/MVK/MARC2/DHRS4/TMEM135/BAAT/SYT7/SCP2/ABCD3/NUDT19/PEX11G/ACOT4/CROT/PXMP2/HACL1/HAO2/ACOX1/PECR/GBF1/ACOT8/ABCD1/PEX26
Small Intestine	green	CC	GO:0005782	peroxisomal matrix	CAT/AGXT/AMACR/DHRS4/BAAT/SCP2/ABCD3/NUDT19/ACOT4/CROT/HACL1/HAO2/ACOX1/ACOT8
Small Intestine	green	CC	GO:0031907	microbody lumen	CAT/AGXT/AMACR/DHRS4/BAAT/SCP2/ABCD3/NUDT19/ACOT4/CROT/HACL1/HAO2/ACOX1/ACOT8
Small Intestine	green	CC	GO:0005778	peroxisomal membrane	IMPDH2/MPV17/ABCD2/CAT/PEX2/DHRS4/TMEM135/SYT7/ABCD3/PEX11G/PXMP2/ACOX1/PECR/ABCD1/PEX26
Small Intestine	green	CC	GO:0031903	microbody membrane	IMPDH2/MPV17/ABCD2/CAT/PEX2/DHRS4/TMEM135/SYT7/ABCD3/PEX11G/PXMP2/ACOX1/PECR/ABCD1/PEX26
Small Intestine	green	CC	GO:0098852	lytic vacuole membrane	BST2/LITAF/ANXA6/HSP90AB1/CP/SLC15A3/NPRL3/PLEKHF1/SLC29A3/VPS11/RAB5C/ATP11A/SLCO4C1/LMBRD1/GLMP/GBA/PLA2G4E/NEU1/SCARB1/CYBRD1/SLC30A2/SNX14/SYT7/SLC39A11/RNF152/SLC17A5/CD164/SLC30A4/AP5B1/GDAP2/RILP/ABCA5/PSEN1/MEAK7/SPPL2A/GNA11/TOM1/ATP6V0D1/ITM2C/CUBN/VNN1/ABHD6/AP5M1/CLCN5/ABCD1
Small Intestine	green	CC	GO:0005765	lysosomal membrane	BST2/LITAF/ANXA6/HSP90AB1/CP/SLC15A3/NPRL3/PLEKHF1/SLC29A3/VPS11/RAB5C/ATP11A/SLCO4C1/LMBRD1/GLMP/GBA/PLA2G4E/NEU1/SCARB1/CYBRD1/SLC30A2/SNX14/SYT7/RNF152/SLC17A5/CD164/SLC30A4/AP5B1/GDAP2/RILP/ABCA5/PSEN1/MEAK7/SPPL2A/GNA11/TOM1/ATP6V0D1/ITM2C/CUBN/VNN1/ABHD6/AP5M1/CLCN5/ABCD1
Small Intestine	green	CC	GO:0016324	apical plasma membrane	BST2/HSP90AB1/ADGRG2/MSN/NOTCH1/EPS15/CEACAM7/AQP10/SLC5A8/RAB27B/SCNN1G/RAB27A/SLC14A2/SLC22A13/SLC17A1/SLC34A2/CLCA4/STK39/SLC26A2/CYP4A11/ENPP3/ITPK1/SLC4A7/TNIK/KISS1/CASR/P2RY4/ATP6V0D1/SLC34A3/SLC9A1/TRPM6/CUBN/PRKG2/MFSD4B/CLIC5/IL6R/PARD6B/PATJ/SLC22A5/SLC22A4
Small Intestine	green	CC	GO:0005770	late endosome	BST2/LITAF/ANXA6/SLC9A9/LRRK2/LTV1/MYO5A/SLC29A3/VPS11/CLCN4/MAP2K1/RAB27B/RAB27A/SLC30A2/CHMP1B/SNX14/MAPK3/SLC31A2/CHMP6/SRC/SLC30A4/SDF4/AP1AR/RILP/ABCA5/NEDD4L/SPPL2A/ATG9A/ATP7B/CHMP1A/ABHD6/GOSR2/AP5M1/SLC17A8
Small Intestine	green	CC	GO:0005774	vacuolar membrane	BST2/LITAF/ANXA6/HSP90AB1/CP/SLC15A3/LTV1/NPRL3/PLEKHF1/SLC29A3/VPS11/ATG9B/RAB5C/ATP11A/SLCO4C1/LMBRD1/GLMP/GBA/PLA2G4E/ABCC11/NEU1/SCARB1/CYBRD1/SLC30A2/SNX14/SYT7/SLC39A11/RNF152/SLC17A5/CD164/SLC30A4/AP5B1/GDAP2/RILP/ABCA5/PSEN1/MEAK7/SPPL2A/GNA11/TOM1/ATP6V0D1/ITM2C/CUBN/VNN1/ABHD6/AP5M1/CLCN5/ABCD1
Small Intestine	green	CC	GO:0070971	endoplasmic reticulum exit site	LRRK2/TMED5/CTAGE15/CTAGE8/CTAGE4/SEC16B/CRYZL2P-SEC16B/SAR1B
Small Intestine	green	CC	GO:0045177	apical part of cell	BST2/HSP90AB1/ADGRG2/MSN/NOTCH1/VCAM1/EPS15/DVL2/TCHP/CEACAM7/AQP10/SLC5A8/RAB27B/SCNN1G/RAB27A/SLC14A2/SLC22A13/SLC17A1/SLC34A2/CLCA4/STK39/SLC26A2/CYP4A11/ENPP3/ITPK1/SLC4A7/TNIK/KISS1/CASR/P2RY4/ATP6V0D1/SLC34A3/SLC9A1/TRPM6/CUBN/PRKG2/MFSD4B/CLIC5/IL6R/PARD6B/PATJ/SLC22A5/SLC22A4/CLCN5/DAB1
Small Intestine	green	CC	GO:0005635	nuclear envelope	CMTM3/PTGES/XPOT/TUBB/SHISA5/BIN1/XPO7/TERF2IP/NXT1/TRA2B/BICD2/UBE2I/PCID2/KPNB1/NUP188/PARP11/XPO4/UNC50/PUM2/SUN2/NUP98/RAE1/NUP42/MTA1/THAP7/DPY19L3/ADRA1B/DISP3/CLCA2/RAP1GAP2/RGPD1/TMEM33/NSMF/CERS2/AGFG1/SYNE4/RNF6/MAPK3/MX1/ANXA11/MACO1/SPAST/MLIP/TMEM120A/PSEN1/PRKG2/TOR1AIP2/ERBIN/PCYT1A/AGPAT3/RETSAT/RNF123
Small Intestine	green	CC	GO:0030684	preribosome	RSL1D1/RPF1/SNU13/MAK16/RIOK1/LTV1/MPHOSPH10/NOC2L/NGDN/FTSJ3/UTP25/RRP7A/ZNF622/RIOK3
Small Intestine	green	CC	GO:0031902	late endosome membrane	LITAF/ANXA6/SLC9A9/LTV1/SLC29A3/VPS11/CLCN4/RAB27B/RAB27A/CHMP1B/SNX14/CHMP6/SLC30A4/RILP/ABCA5/SPPL2A/ATG9A/ABHD6/GOSR2/AP5M1
Small Intestine	green	CC	GO:0005643	nuclear pore	XPOT/XPO7/NXT1/BICD2/PCID2/KPNB1/NUP188/PARP11/XPO4/NUP98/RAE1/NUP42/RGPD1/TMEM33/AGFG1
Small Intestine	green	CC	GO:0005811	lipid droplet	SET/RAB5C/AQP10/HSD17B13/LIPE/TMEM135/SPAST/NSDHL/AIFM2/AQP7/PNPLA2/PNPLA1/GBF1/OSBPL2
Small Intestine	green	MF	GO:0015291	secondary active transmembrane transporter activity	SLC9A9/SLC15A3/SLC25A30/CLCN4/SLC38A1/SLC35A1/SLC38A4/SLC16A9/SLCO4C1/SLC45A2/SLC26A8/SLC5A8/SLC6A12/SLC16A4/SLC9C1/SLC10A1/SLC10A5/SLC17A1/SLC34A2/SLC26A2/SLC17A5/SLC47A2/SLC4A7/SLC34A3/SLC5A4/SLC6A13/SLC9A1/MFSD4B/SLC25A16/SLC35D1/SLC25A5/SLC22A5/SLC22A4/SLC13A1/CLCN5/SLC26A1/SLC17A8
Small Intestine	green	MF	GO:0016616	oxidoreductase activity, acting on the CH-OH group of donors, NAD or NADP as acceptor	ADH1B/IMPDH2/LDHB/IMPDH1/BMP2/BDH2/CYP4A22/AKR1C2/HSD17B3/UGDH/DHRS4/GPD2/DHRS9/AKR1B15/RDH5/NSDHL/HADHB/HADHA/RDH13/LDHAL6B/ME2/DHDH/SDR42E1
Small Intestine	green	MF	GO:0016614	oxidoreductase activity, acting on CH-OH group of donors	ADH1B/IMPDH2/LDHB/IMPDH1/BMP2/BDH2/CYP4A22/AKR1C2/HSD17B3/UGDH/DHRS4/GPD2/DHRS9/AKR1B15/RDH5/NSDHL/HADHB/HADHA/RDH13/LDHAL6B/HAO2/ME2/DHDH/SDR42E1
Small Intestine	green	MF	GO:0050662	coenzyme binding	LDHB/PRMT1/KDM1A/DHODH/ACBD6/PCIF1/CARNS1/IVD/GCDH/BDH2/GLUD1/CAT/AGXT/SPTLC3/SIRT5/UGDH/MARC2/ACADM/PANK1/SCP2/ALAS1/AIFM2/CRYZ/ACOT12/HADHA/TPMT/ASPDH/HACL1/AGXT2/TAT/PC/FMO1/HAO2/ACOX1/FMO4/PDXK/ACOT11/PANK3/ME2/POR/ACBD4/GFER
Small Intestine	green	MF	GO:0022804	active transmembrane transporter activity	SLC9A9/SLC15A3/SLC25A30/CLCN4/ABCD2/SLC38A1/SLC35A1/SLC38A4/SLC16A9/SLCO4C1/LMBRD1/SLC45A2/SLC26A8/SLC5A8/SLC6A12/SLC16A4/ABCC11/SLC9C1/SLC10A1/ATP1B3/ABCC5/SLC10A5/SLC17A1/SLC34A2/ABCD3/SLC26A2/SLC17A5/SLC47A2/SLC4A7/ATP2A1/ABCA5/ATP6V0D1/SLC34A3/SLC5A4/SLC6A13/SLC9A1/MFSD4B/ATP7B/SLC25A16/SLC35D1/SLC25A5/SLC22A5/SLC22A4/SLC13A1/CLCN5/ABCD1/SLC26A1/SLC17A8
Small Intestine	green	MF	GO:0052689	carboxylic ester hydrolase activity	LARS1/IARS1/PON1/LIPC/PLA2G4E/LIPE/PON3/PLA2G4D/CA1/ACHE/BAAT/ACOT4/ACOT12/ABHD12/PNPLA2/BPHL/CHKA/GDPD1/PAFAH2/ACOT11/PNPLA1/ACOT8/ABHD6
Small Intestine	green	MF	GO:0008509	anion transmembrane transporter activity	CLIC2/SLC25A30/CLCN4/SLC38A1/SLC35A1/SLC38A4/SLC16A9/SLCO4C1/SLC26A8/SLC5A8/SLC6A12/CLCA2/SLC16A4/ABCC11/SLC7A1/SLC10A1/GABRA2/ABCC5/SLC22A13/SLC17A1/SLC34A2/CLCA4/SLC26A2/XPR1/SLC17A5/GLRA4/SLC4A7/SLC25A13/GPR89A/SFXN3/SLC25A15/SLC35A3/SLC34A3/SLC6A13/CLIC5/CLCN2/SLC35D1/SLC25A5/SLC13A1/CLCN5/ABCD1/SLC26A1/SLC17A8
Small Intestine	green	MF	GO:0008514	organic anion transmembrane transporter activity	SLC25A30/SLC38A1/SLC35A1/SLC38A4/SLC16A9/SLCO4C1/SLC26A8/SLC5A8/SLC6A12/SLC16A4/ABCC11/SLC7A1/SLC10A1/ABCC5/SLC22A13/SLC17A1/SLC26A2/SLC17A5/SLC4A7/SLC25A13/SFXN3/SLC25A15/SLC35A3/SLC6A13/SLC35D1/SLC25A5/SLC13A1/ABCD1/SLC26A1/SLC17A8
Small Intestine	green	MF	GO:0047617	acyl-CoA hydrolase activity	GCDH/BAAT/NUDT19/ACOT4/ACOT12/ACOT11/ACOT8

## Sheet: Liver_KEGG
Table S3-5: KEGG enrichment of liver (group 1).
Tissue	Module	ID	Description	GeneID
liver	turquoise	hsa05204	Chemical carcinogenesis	ADH6/ADH1B/NAT1/ADH4/ADH1C/CYP2C9/GSTK1/UGT2B10/GSTA1/ADH1A/CYP2C8/CYP3A43/SULT1A2/CBR1/UGT2B7/GSTA4/CYP2A6/UGT2B15/CYP1A2/EPHX1/MGST2/SULT1A1/GSTA2/CYP2C19/CYP3A4/GSTM4/UGT2B11/NAT2/CYP3A5/ARNT/CYP3A7/CYP1A1/CYP2E1/CYP2A13/ADH7/CYP3A7-CYP3A51P/UGT1A7/ALDH1A3
liver	turquoise	hsa00830	Retinol metabolism	ADH6/ADH1B/ADH4/CYP4A11/DHRS4L1/ADH1C/CYP2C9/UGT2B10/CYP4A22/DHRS4/DHRS4L2/ADH1A/CYP2C8/UGT2B7/RDH5/CYP2A6/UGT2B15/CYP1A2/CYP3A4/ALDH1A1/UGT2B11/CYP3A5/LRAT/CYP3A7/CYP2B6/CYP1A1/ADH7/CYP3A7-CYP3A51P/RDH12/UGT1A7/CYP27C1
liver	turquoise	hsa04146	Peroxisome	ACOX2/AMACR/PECR/CAT/PEX11G/DAO/ECI2/EHHADH/ACOX1/DHRS4L1/PXMP2/EPHX2/ACAA1/GSTK1/HAO2/DHRS4/IDH1/PHYH/PEX14/XDH/PIPOX/HMGCL/PXMP4/PAOX/SOD1/MLYCD/ABCD3/PEX16/PEX10/ECH1/HMGCLL1/MPV17L/MPV17/SOD2
liver	turquoise	hsa00980	Metabolism of xenobiotics by cytochrome P450	ADH6/ADH1B/ADH4/ADH1C/CYP2C9/GSTK1/UGT2B10/GSTA1/ADH1A/CBR1/UGT2B7/GSTA4/CYP2A6/UGT2B15/CYP1A2/EPHX1/MGST2/AKR7A2/GSTA2/CYP3A4/GSTM4/UGT2B11/CYP3A5/AKR7A3/CYP2B6/CYP1A1/CYP2E1/CYP2A13/ADH7/UGT1A7/ALDH1A3/DHDH
liver	turquoise	hsa00982	Drug metabolism - cytochrome P450	FMO3/ADH6/ADH1B/FMO5/FMO4/ADH4/ADH1C/CYP2C9/GSTK1/UGT2B10/GSTA1/ADH1A/CYP2C8/UGT2B7/GSTA4/CYP2A6/UGT2B15/CYP1A2/MGST2/GSTA2/CYP2C19/CYP3A4/GSTM4/UGT2B11/CYP3A5/CYP2B6/CYP2E1/ADH7/UGT1A7/ALDH1A3
liver	turquoise	hsa00071	Fatty acid degradation	ADH6/ADH1B/ECI2/EHHADH/ACADL/ADH4/ACOX1/CYP4A11/ADH1C/ALDH3A2/ACAA1/HADH/ALDH7A1/CYP4A22/ACADSB/ADH1A/GCDH/ECHS1/ACADS/ECI1/ADH7/ACSBG1
liver	turquoise	hsa00140	Steroid hormone biosynthesis	SULT1E1/AKR1D1/UGT2B10/HSD17B8/SRD5A2/UGT2B7/UGT2B15/CYP1A2/CYP7A1/CYP3A4/SRD5A1/UGT2B11/HSD11B2/CYP3A5/LRTOMT/CYP3A7/CYP1A1/CYP2E1/COMT/DHRS11/CYP3A7-CYP3A51P/HSD3B1/UGT1A7/CYP21A2
liver	turquoise	hsa00650	Butanoate metabolism	ALDH5A1/EHHADH/BDH1/BDH2/HADH/ACSM2A/ACSM2B/HMGCS2/ACSM5/ECHS1/HMGCL/ACADS/HMGCLL1/ACSM1
liver	turquoise	hsa00260	Glycine, serine and threonine metabolism	GRHPR/DMGDH/DAO/GLYCTK/AMT/ALDH7A1/GATM/SARDH/BHMT/PIPOX/PHGDH/GNMT/GCAT/GAMT/CBS/SHMT2/SDSL
liver	turquoise	hsa00350	Tyrosine metabolism	ADH6/ADH1B/ADH4/ADH1C/GSTZ1/ADH1A/DBH/HPD/DCT/LRTOMT/ADH7/COMT/ALDH1A3/IL4I1
liver	turquoise	hsa00380	Tryptophan metabolism	DHTKD1/CAT/AADAT/HAAO/EHHADH/ALDH3A2/HADH/ALDH7A1/GCDH/ECHS1/CYP1A2/IDO2/CYP1A1/IL4I1
liver	turquoise	hsa00010	Glycolysis / Gluconeogenesis	ADH6/ADH1B/ADH4/PCK2/ADH1C/PKLR/ALDH3A2/ALDH7A1/GALM/ADH1A/ALDOB/AKR1A1/GCK/ADH7/ALDH1A3/ACSS1/HK2/PFKP/ALDOA
liver	turquoise	hsa00983	Drug metabolism - other enzymes	UPB1/NAT1/UGT2B10/GSTA1/DPYS/XDH/UGT2B7/GSTA4/CYP2A6/UGT2B15/MGST2/GSTA2/CYP3A4/GSTM4/UGT2B11/NAT2/CYP2E1/UGT1A7/NME2/TYMP/UPP1
liver	turquoise	hsa00280	Valine, leucine and isoleucine degradation	EHHADH/ALDH3A2/IVD/ACAA1/HADH/ALDH7A1/ACADSB/HMGCS2/ECHS1/HMGCL/ACADS/MCEE/HMGCLL1/IL4I1/BCAT1
liver	turquoise	hsa00040	Pentose and glucuronate interconversions	SORD/DCXR/UGT2B10/CRYL1/XYLB/AKR1A1/UGT2B7/UGT2B15/UGP2/UGT2B11/UGT1A7/DHDH
liver	turquoise	hsa01230	Biosynthesis of amino acids	PKLR/PAH/OTC/IDH1/ALDOB/MAT1A/GPT/PHGDH/MAT2B/ASS1/CBS/SHMT2/PYCR1/SDSL/RPIA/ASNS/BCAT1/PYCR2/PFKP/ALDOA
liver	turquoise	hsa03320	PPAR signaling pathway	ACOX2/EHHADH/ACADL/ACOX1/CYP4A11/PCK2/CYP27A1/ACAA1/CYP4A22/HMGCS2/CYP7A1/APOC3/APOA1/APOA5/APOA2/RXRG/FABP1/ACSBG1/PPARD/GK
liver	turquoise	hsa01200	Carbon metabolism	CAT/EHHADH/GLYCTK/AMT/ACOX1/RGN/PKLR/OGDHL/IDNK/HAO2/IDH1/ALDOB/GPT/ECHS1/PHGDH/TKFC/ACADS/GCK/MCEE/SHMT2/ACSS1/SDSL/MTHFR/RPIA/HK2/PFKP/ALDOA
liver	turquoise	hsa00410	beta-Alanine metabolism	UPB1/EHHADH/ACOX1/ALDH3A2/ALDH7A1/DPYS/ECHS1/CNDP1/ACADS/MLYCD/ALDH1A3
liver	turquoise	hsa00601	Glycosphingolipid biosynthesis - lacto and neolacto series	ST3GAL3/B3GNT2/ST3GAL6/ST3GAL4/FUT7/FUT1/B3GNT5/FUT4/B4GALT3/A4GALT
liver	turquoise	hsa00590	Arachidonic acid metabolism	CYP4A11/CYP2C9/CYP4F2/EPHX2/CYP4A22/CYP2C8/CBR1/CYP2J2/CYP2C19/CYP4F3/CYP2B6/GGT1/CYP2E1/PRXL2B/GPX1/PLA2G2A/GPX3
liver	turquoise	hsa00770	Pantothenate and CoA biosynthesis	UPB1/PANK1/ENPP1/DPYS/ENPP3/PANK4/BCAT1/VNN2
liver	turquoise	hsa00051	Fructose and mannose metabolism	SORD/PFKFB1/ALDOB/TKFC/KHK/PFKFB4/TSTA3/GMDS/HK2/PFKP/ALDOA
liver	turquoise	hsa04977	Vitamin digestion and absorption	FOLH1/SLC23A1/MMACHC/SLC46A1/APOA1/LRAT/SLC19A1/SCARB1/SLC5A6
liver	turquoise	hsa04360	Axon guidance	SMO/SEMA4G/EPHA1/PIK3R1/SEMA5A/RAC3/GSK3B/PLCG2/WNT5B/CAMK2D/GNAI1/NFATC2/FYN/WNT5A/CAMK2B/PRKCA/PAK1/UNC5A/NTNG2/EPHB4/RYK/ABLIM2/TRPC4/SEMA4C/SRGAP1/SSH2/SEMA7A/PLXNA2/LIMK1/NRP1/EFNA3/PLXNA1/RHOD/MYL12A/CFL1/LIMK2
liver	turquoise	hsa04910	Insulin signaling pathway	PRKAB2/PCK2/GYS2/PKLR/IRS1/PIK3R1/CALML4/GSK3B/ACACB/GCK/PPP1R3B/FASN/CALM3/SOS1/PPP1CC/CALML3/INSR/SH2B2/PHKG1/RAPGEF1/GRB2/HK2/CALM2/FLOT2/PTPN1/SOCS1/RHOQ/FLOT1/SHC1
liver	turquoise	hsa05100	Bacterial invasion of epithelial cells	ELMO1/PIK3R1/CTNNA3/CDH1/ARHGAP10/SEPTIN2/ITGA5/ACTG1/ELMO2/SEPTIN9/ARPC2/ARPC4/CLTB/BCAR1/ARPC5L/ARPC1B/RHOG/SHC1
liver	turquoise	hsa00120	Primary bile acid biosynthesis	ACOX2/AMACR/AKR1D1/CYP39A1/CYP27A1/CYP46A1/CYP7A1
liver	turquoise	hsa00760	Nicotinate and nicotinamide metabolism	SIRT3/SIRT5/ASPDH/ENPP1/QPRT/NADK2/ENPP3/NMRK1/NT5E/NMNAT3/CD38
liver	turquoise	hsa00072	Synthesis and degradation of ketone bodies	BDH1/BDH2/HMGCS2/HMGCL/HMGCLL1
liver	turquoise	hsa00340	Histidine metabolism	ASPA/HNMT/ALDH3A2/ALDH7A1/UROC1/CNDP1/HDC/ALDH1A3

## Sheet: Small Intestine_KEGG
Table S3-6: KEGG enrichment of small intestine (group 2).
Tissue	Module	ID	Description	GeneID
Small Intestine	turquoise	hsa00980	Metabolism of xenobiotics by cytochrome P450	ADH6/AKR7A3/CYP2S1/CYP2B6/CYP3A5/UGT1A10/CYP2C9/UGT1A1/UGT2A3/GSTO2/CBR1/UGT2B7/GSTM4/UGT2B15/UGT1A8/GSTA2/GSTA1/DHDH/CYP2D6/LOC107987478/LOC107987479/ADH1C/SULT2A1/CYP3A4/UGT2B17/AKR7A2/MGST1/ALDH3B1/ALDH3A1/CYP2D7/HPGDS/GSTM2/ALDH1A3/ADH1B
Small Intestine	turquoise	hsa04975	Fat digestion and absorption	PLA2G10/DGAT1/PLA2G12B/ABCG8/PLPP2/ABCG5/MOGAT3/MOGAT2/AGPAT2/FABP1/FABP2/MTTP/SLC27A4/APOB/PNLIPRP2/APOA1/APOA4/PLA2G2A/ACAT2/SCARB1/PLA2G3/ABCA1
Small Intestine	turquoise	hsa05204	Chemical carcinogenesis	NAT2/ADH6/NAT1/CYP2C19/CYP2C18/SULT1A2/CYP3A5/UGT1A10/CYP2C9/UGT1A1/UGT2A3/SULT1A1/GSTO2/CBR1/UGT2B7/GSTM4/UGT2B15/UGT1A8/GSTA2/GSTA1/ADH1C/SULT2A1/CYP3A4/SULT1A3/UGT2B17/MGST1/ALDH3B1/ALDH3A1/SULT1A4/AKR1C2/HPGDS/GSTM2/ALDH1A3/ADH1B
Small Intestine	turquoise	hsa00982	Drug metabolism - cytochrome P450	ADH6/FMO5/CYP2B6/CYP2C19/CYP3A5/UGT1A10/CYP2C9/UGT1A1/UGT2A3/GSTO2/UGT2B7/GSTM4/UGT2B15/UGT1A8/GSTA2/GSTA1/CYP2D6/LOC107987478/LOC107987479/ADH1C/CYP3A4/UGT2B17/MGST1/ALDH3B1/ALDH3A1/CYP2D7/HPGDS/FMO3/GSTM2/ALDH1A3/ADH1B
Small Intestine	turquoise	hsa04950	Maturity onset diabetes of the young	NR5A2/HNF1A/HNF1B/MNX1/HNF4A/HNF4G/FOXA3/PKLR/NEUROD1/SLC2A2/RFX6/FOXA2/PAX6/NKX2-2/PAX4/NEUROG3
Small Intestine	turquoise	hsa04974	Protein digestion and absorption	DPP4/ATP1A1/PRSS3/SLC36A1/SLC1A1/SLC3A1/KCNQ1/SLC9A3/COL17A1/KCNK5/ACE2/MEP1A/MME/SLC6A19/XPNPEP2/SLC7A7/SLC7A9/MEP1B/SLC15A1/KCNJ13/ATP1B1/KCNE3/SLC16A10/PRSS2/CPA2/SLC3A2/COL2A1/COL11A2/ATP1A4/SLC38A2/COL27A1/COL22A1/SLC36A4/PRCP/COL9A3/COL14A1/FXYD2
Small Intestine	turquoise	hsa00051	Fructose and mannose metabolism	TKFC/HKDC1/GMDS/FBP1/KHK/PFKFB4/AKR1B10/PFKL/ALDOB/FCSK/TPI1/HK2/TSTA3/GMPPA/PMM2/FBP2/HK1
Small Intestine	turquoise	hsa04973	Carbohydrate digestion and absorption	SLC37A4/PLCB3/MGAM2/ATP1A1/HKDC1/CACNA1D/SLC2A2/SI/SLC2A5/SLC5A1/MGAM/ATP1B1/LCT/HK2/G6PC/PIK3R2/ATP1A4/AKT2/FXYD2/PIK3CA/HK1
Small Intestine	turquoise	hsa00010	Glycolysis / Gluconeogenesis	ADH6/PCK2/HKDC1/FBP1/ACSS2/PKLR/GALM/PFKL/ALDOB/MINPP1/ADH1C/PCK1/TPI1/HK2/G6PC/ALDH3A2/ALDH3B1/ALDH3A1/PGK1/FBP2/ENO1/ALDH1A3/ADH1B/HK1/ENO2/LDHB
Small Intestine	turquoise	hsa00052	Galactose metabolism	MGAM2/GALE/HKDC1/GALM/SI/AKR1B10/PFKL/MGAM/LCT/HK2/G6PC/GLB1/GALK1/GLA/HK1
Small Intestine	turquoise	hsa00590	Arachidonic acid metabolism	PLA2G4F/PLA2G10/PLA2G12B/CYP2B6/CYP2J2/CYP2C19/CYP4F3/AKR1C3/CYP2C9/PRXL2B/CBR1/GGT1/CYP4F2/PLB1/EPHX2/PLA2G4D/GPX2/PLA2G2A/PLA2G4E/ALOX15B/PLA2G3/HPGDS/PLA2G4C/CYP2U1
Small Intestine	turquoise	hsa00140	Steroid hormone biosynthesis	HSD17B2/DHRS11/AKR1C3/CYP3A5/UGT1A10/HSD11B2/UGT1A1/UGT2A3/UGT2B7/UGT2B15/UGT1A8/HSD3B2/HSD3B1/SRD5A1/SULT1E1/SULT2B1/CYP3A4/AKR1C4/UGT2B17/HSD17B8/AKR1C2/CYP21A2/CYP7B1
Small Intestine	turquoise	hsa04726	Serotonergic synapse	PLA2G4F/PLCB3/HTR4/KCNJ3/HTR1D/DDC/CACNA1D/CYP2J2/CYP2C19/CYP2C18/CYP2C9/SLC6A4/CASP3/MAPK3/TPH1/SLC18A1/CYP2D6/LOC107987478/LOC107987479/HTR3E/GNG13/PLA2G4D/CACNA1A/GNG5/HTR3C/CYP2D7/PLA2G4E/ALOX15B/MAP2K1/PLA2G4C/ITPR2/MAPK1/BRAF/PRKACB/GNG2/GNAS/ITPR1
Small Intestine	turquoise	hsa04976	Bile secretion	NR1H4/ATP1A1/ABCG8/SLC51A/SLC51B/ABCG5/ABCG2/ABCB1/SLC9A3/HMGCR/SLC10A2/SLC5A1/CFTR/SLC9A1/NR0B2/ABCC2/ATP1B1/SULT2A1/SCTR/CYP3A4/SCT/SCARB1/ATP1A4/FXYD2/PRKACB/GNAS
Small Intestine	turquoise	hsa04978	Mineral absorption	VDR/ATP1A1/SLC26A6/SLC31A1/SLC9A3/SLC26A3/SLC5A1/SLC6A19/SLC39A4/ATP1B1/TRPM6/SLC34A3/HMOX2/SLC40A1/MT1F/HMOX1/MT1G/MT1H/TRPV6/ATP1A4/ATP7A/FXYD2
Small Intestine	turquoise	hsa00512	Mucin type O-glycan biosynthesis	GALNT5/B3GNT6/GALNT4/GALNT7/GALNT3/GCNT1/ST6GALNAC1/GCNT3/GALNT1/GALNT6/GALNT14/GALNT8/GALNT9/ST3GAL2
Small Intestine	turquoise	hsa00900	Terpenoid backbone biosynthesis	PDSS1/HMGCR/HMGCS1/DHDDS/HMGCS2/FDPS/MVK/IDI1/ACAT2/MVD/FNTA
Small Intestine	turquoise	hsa00591	Linoleic acid metabolism	PLA2G4F/PLA2G10/PLA2G12B/CYP2J2/CYP2C19/CYP2C9/PLB1/CYP3A4/PLA2G4D/PLA2G2A/PLA2G4E/PLA2G3/PLA2G4C
Small Intestine	turquoise	hsa00480	Glutathione metabolism	GSR/GGT6/ANPEP/GSTO2/IDH1/GGT1/GSTM4/GSTA2/GSTA1/NAT8B/GCLM/GSS/PGD/GCLC/GPX2/MGST1/TXNDC12/HPGDS/GSTM2/RRM2B
Small Intestine	turquoise	hsa04930	Type II diabetes mellitus	PRKCZ/HKDC1/CACNA1D/PKLR/SLC2A2/MAPK3/HK2/CACNA1A/PIK3R2/KCNJ11/SOCS4/SOCS3/CACNA1E/PRKCE/MAPK1/PIK3CA/HK1
Small Intestine	turquoise	hsa05168	Herpes simplex virus 1 infection	CASP3/ZNF440/ZNF3/NECTIN1/POU2F3/NXF3/PPP1CC/TICAM1/ZNF223/ZNF91/PIK3R2/MAVS/ZNF564/FADD/ZNF114/ZNF730/ZNF670/ZNF616/ZNF473/ZNF669/NXF5/ZNF559-ZNF177/ZNF878/ZNF30/ZNF624/ZNF460/ZNF558/ZNF222/ZNF398/ZNF484/ZNF514/ZNF641/ZNF181/ZNF746/ZNF879/ZNF718/ZNF627/TNFSF14/ZNF140/SRSF4/ZNF547/ZNF772/ZNF2/ZNF585B/ZNF442/SOCS3/ZNF597/ZNF37A/ZNF528/ZNF836/ZNF264/ZFP92/ZNF256/NXF1/ZNF404/ZNF383/ZNF461/ZNF891/C5/…
Small Intestine	turquoise	hsa00600	Sphingolipid metabolism	SMPD3/PLPP2/DEGS2/SGPP2/NEU4/SGPL1/SPHK2/GBA2/CERS6/GALC/GLB1/SPTLC2/GBA/GLA/CERS3/SPHK1/CERS5
Small Intestine	turquoise	hsa04910	Insulin signaling pathway	CALML4/PRKCZ/PCK2/HKDC1/FBP1/PKLR/INPP5J/PRKAB1/MAPK3/PCK1/HK2/G6PC/MAP2K2/PPP1CC/PIK3R2/PHKB/FBP2/MKNK1/ELK1/INPP5K/SOCS4/MAP2K1/GYS2/SOCS3/CBL/EXOC7/PHKG1/FLOT1/FOXO1/INPPL1/MAPK1/RPS6KB1/BRAF/AKT2/PRKACB/PIK3CA/HK1/PPP1R3F/RHOQ
Small Intestine	turquoise	hsa00520	Amino sugar and nucleotide sugar metabolism	GALE/HKDC1/CMAS/GMDS/GFPT1/FCSK/UGDH/NANS/HK2/TSTA3/GMPPA/PMM2/PGM3/GALK1/RENBP/UXS1/HK1
Small Intestine	turquoise	hsa04666	Fc gamma R-mediated phagocytosis	PLA2G4F/SCIN/PIP5K1B/PLD1/PLPP2/DNM2/MYO10/SPHK2/MAPK3/PAK1/CFL1/PLA2G4D/PIK3R2/PLA2G4E/PLD2/VASP/MAP2K1/WASF2/SPHK1/PLA2G4C/ARPC2/INPPL1/PRKCE/MAPK1/RPS6KB1/AKT2/ASAP1/PIK3CA
Small Intestine	turquoise	hsa04071	Sphingolipid signaling pathway	PRKCZ/PLCB3/MAPK13/PLD1/DEGS2/SGPP2/CTSD/SGPL1/SPHK2/MAPK3/CERS6/MAP2K2/PPP2R1B/SPTLC2/PIK3R2/ADORA3/PLD2/CERS3/OPRD1/MAP2K1/SPHK1/MAPK12/S1PR1/RHOA/PRKCE/MAPK1/MAPK11/S1PR2/ROCK1/PPP2R5C/AKT2/PIK3CA/RELA/CERS5

## Sheet: Liver_without ncRNAs_KEGG
Table S3-7: KEGG enrichment of the liver without ncRNAs (group 3).
Tissue	Module	ID	Description	GeneID
liver	blue	hsa00053	Ascorbate and aldarate metabolism	ALDH3A2/ALDH9A1/ALDH7A1/ALDH1B1/AKR1A1/ALDH2/UGT2B11/UGT2B28/UGT1A7/POU5F1

## Sheet: SI_without ncRNAs_KEGG
Table S3-8: KEGG enrichment of the small intestine without ncRNAs (group 4).
Tissue	Module	ID	Description	GeneID
Small Intestine	blue	hsa00051	Fructose and mannose metabolism	HK1/GMPPB/PMM2/GMPPA/TSTA3/TPI1/HK2/FCSK/ALDOB/PFKL/AKR1B10/PFKFB4/KHK/FBP1/TKFC/HKDC1/GMDS
Small Intestine	blue	hsa00052	Galactose metabolism	HK1/GCK/GLA/GALK1/GLB1/G6PC/LCT/HK2/MGAM/PFKL/GALM/AKR1B10/SI/HKDC1/MGAM2/GALE
