# Supplementary material for: Transcription Factors and ncRNAs Associated with CYP3A Expression in Human Liver and Small Intestine Assessed with Weighted Gene Co-Expression Network Analysis
Source: Biomedicines. 2022 Nov 28;10(12):3061. doi: 10.3390/biomedicines10123061 (PMC9775998; doi:10.3390/biomedicines10123061)
Supplement: Supplementary file 1 [file biomedicines-10-03061-s001.zip › Table S4.pdf]

Table S4. Comparison of *CYP3A* associated TFs with or without ncRNAs in liver and small intestine.

| <i>CYP3A</i>  | Tissue          | Group                  | Number of TFs | Number of overlapping TFs | Number and percentage of different TFs |
|---------------|-----------------|------------------------|---------------|---------------------------|----------------------------------------|
| <i>CYP3A4</i> | Liver           | Group 1 with ncRNAs    | 50            | 24                        | 26 (52.0%)                             |
|               |                 | Group 3 without ncRNAs | 26            |                           | 2 (7.7%)                               |
| <i>CYP3A5</i> | Liver           | Group 1 with ncRNAs    | 43            | 24                        | 19 (44.2%)                             |
|               |                 | Group 3 without ncRNAs | 29            |                           | 5 (17.2%)                              |
| <i>CYP3A7</i> | Liver           | Group 1 with ncRNAs    | 45            | 24                        | 21 (46.7%)                             |
|               |                 | Group 3 without ncRNAs | 27            |                           | 3 (11.1%)                              |
| <i>CYP3A4</i> | Small intestine | Group 2 with ncRNAs    | 301           | 270                       | 31 (10.3%)                             |
|               |                 | Group 4 without ncRNAs | 305           |                           | 35 (11.5%)                             |
| <i>CYP3A5</i> | Small intestine | Group 2 with ncRNAs    | 339           | 305                       | 34 (10.0%)                             |
|               |                 | Group 4 without ncRNAs | 356           |                           | 51 (14.3%)                             |
| <i>CYP3A7</i> | Small intestine | Group 2 with ncRNAs    | 22            | 19                        | 3 (13.6%)                              |
|               |                 | Group 4 without ncRNAs | 31            |                           | 12 (38.7%)                             |

TFs associated with each *CYP3A* with a weight value greater than 0.05 from group 1 to 4 are obtained. For each *CYP3A*, the numbers of TFs associated with each *CYP3A* are compared with or without ncRNAs in liver and small intestine.
