# Supplementary material for: Transcription Factors and ncRNAs Associated with CYP3A Expression in Human Liver and Small Intestine Assessed with Weighted Gene Co-Expression Network Analysis
Source: Biomedicines. 2022 Nov 28;10(12):3061. doi: 10.3390/biomedicines10123061 (PMC9775998; doi:10.3390/biomedicines10123061)
Supplement: Supplementary file 1 [file biomedicines-10-03061-s001.zip › Table S5.pdf]

Table S5. Comparison of *CYP3A* associated TFs and ncRNAs between three *CYP3As* in liver and small intestine.

| Group                                     | <i>CYP3A</i>  | Number of ncRNAs and TFs | Number of overlapping ncRNAs | Number and percentage of different ncRNAs | Number of overlapping TFs | Number and percentage of different TFs |
|-------------------------------------------|---------------|--------------------------|------------------------------|-------------------------------------------|---------------------------|----------------------------------------|
| Group 1 with all genes in liver           | <i>CYP3A4</i> | 66 ncRNAs and 50 TFs     | 52                           | 14 (21.2%)                                | 43                        | 7 (14.0%)                              |
|                                           | <i>CYP3A5</i> | 53 ncRNAs and 43 TFs     |                              | 1 (1.9%)                                  |                           | 0 (0.0%)                               |
|                                           | <i>CYP3A4</i> | 66 ncRNAs and 50 TFs     | 56                           | 10 (15.2%)                                | 43                        | 7 (14.0%)                              |
|                                           | <i>CYP3A7</i> | 57 ncRNAs and 45 TFs     |                              | 1 (1.8%)                                  |                           | 2 (4.4%)                               |
|                                           | <i>CYP3A5</i> | 53 ncRNAs and 43 TFs     | 51                           | 2 (3.8%)                                  | 42                        | 1 (2.3%)                               |
|                                           | <i>CYP3A7</i> | 57 ncRNAs and 45 TFs     |                              | 6 (10.5%)                                 |                           | 3 (6.7%)                               |
| Group 2 with all genes in small intestine | <i>CYP3A4</i> | 551 ncRNAs and 301 TFs   | 551                          | 0 (0.0%)                                  | 301                       | 0 (0.0%)                               |
|                                           | <i>CYP3A5</i> | 642 ncRNAs and 339 TFs   |                              | 91 (14.2%)                                |                           | 38 (11.2%)                             |
|                                           | <i>CYP3A4</i> | 551 ncRNAs and 301 TFs   | 0                            | 551 (100%)                                | 0                         | 301 (100%)                             |
|                                           | <i>CYP3A7</i> | 57 ncRNAs and 22 TFs     |                              | 57 (100%)                                 |                           | 22 (100%)                              |
|                                           | <i>CYP3A5</i> | 642 ncRNAs and 339 TFs   | 0                            | 642 (100%)                                | 0                         | 339 (100%)                             |
|                                           | <i>CYP3A7</i> | 57 ncRNAs and 22 TFs     |                              | 57 (100%)                                 |                           | 22 (100%)                              |

TFs associated with each *CYP3A* with a weight value greater than 0.05 from group 1 (with all genes in liver) to 2 (with all genes in small intestine) are obtained. The numbers of TFs and ncRNAs associated with each *CYP3A* are compared between three *CYP3As* in liver and small intestine. In group 2, *CYP3A4* and *3A5* are in turquoise module and *CYP3A7* in red module, thus no overlapping TFs and ncRNAs are between *CYP3A4* and *3A7* or *CYP3A5* and *3A7*.
