# Supplementary material for: Transcription Factors and ncRNAs Associated with CYP3A Expression in Human Liver and Small Intestine Assessed with Weighted Gene Co-Expression Network Analysis
Source: Biomedicines. 2022 Nov 28;10(12):3061. doi: 10.3390/biomedicines10123061 (PMC9775998; doi:10.3390/biomedicines10123061)
Supplement: Supplementary file 1 [file biomedicines-10-03061-s001.zip › Table S6.pdf]

Table S6. Comparison of *CYP3A* associated ncRNAs and TFs between liver and small intestine.

| <i>CYP3A</i>  | Tissue          | Gene Type | Number of ncRNAs | Number of overlapping ncRNAs | Number and percentage of different ncRNAs | Number of TFs | Number of overlapping TFs | Number and percentage of different TFs |
|---------------|-----------------|-----------|------------------|------------------------------|-------------------------------------------|---------------|---------------------------|----------------------------------------|
| <i>CYP3A4</i> | Liver           | All genes | 66               | 15                           | 51 (77.3%)                                | 50            | 7                         | 43 (86.0%)                             |
|               | Small intestine | All genes | 551              |                              | 536 (97.3%)                               | 301           |                           | 294 (97.7%)                            |
| <i>CYP3A5</i> | Liver           | All genes | 53               | 14                           | 39 (73.6%)                                | 43            | 8                         | 35 (81.4%)                             |
|               | Small intestine | All genes | 642              |                              | 628 (97.8%)                               | 339           |                           | 331 (97.6%)                            |
| <i>CYP3A7</i> | Liver           | All genes | 57               | 2                            | 55 (96.5%)                                | 45            | 1                         | 44 (97.8%)                             |
|               | Small intestine | All genes | 57               |                              | 55 (96.5%)                                | 22            |                           | 21 (95.5%)                             |

TFs and ncRNAs associated with each *CYP3A* with a weight value greater than 0.05 from group 1 to 2 are obtained. For each *CYP3A*, the numbers of TFs and ncRNAs associated with each *CYP3A* are compared between liver and small intestine.
