# Supplementary material for: Transcription Factors and ncRNAs Associated with CYP3A Expression in Human Liver and Small Intestine Assessed with Weighted Gene Co-Expression Network Analysis
Source: Biomedicines. 2022 Nov 28;10(12):3061. doi: 10.3390/biomedicines10123061 (PMC9775998; doi:10.3390/biomedicines10123061)
Supplement: Supplementary file 1 [file biomedicines-10-03061-s001.zip › Table S7.pdf]

Table S7. Transcriptional factors contributing to *CYP3A* gene expression level in the liver and the small intestine.

| Liver ( n = 193 )           |                      |         |               |                        |                 |        |                       |
|-----------------------------|----------------------|---------|---------------|------------------------|-----------------|--------|-----------------------|
| Dependent Variable          | Independent Variable | Type    | Adj. R-Square | <i>p</i> -Value        | R-Square change | Beta   | <i>p</i> -Value       |
| CYP3A4                      |                      |         | 45.07%        | $7.07 \times 10^{-26}$ |                 |        |                       |
|                             | ESR1                 | humanTF |               |                        | 36.36%          | 0.400  | $3.16 \times 10^{-9}$ |
|                             | TEAD2                | humanTF |               |                        | 9.28%           | -0.366 | $4.59 \times 10^{-8}$ |
| CYP3A5                      |                      |         | 55.31%        | $2.24 \times 10^{-31}$ |                 |        |                       |
|                             | NR1I2                | humanTF |               |                        | 40.48%          | 0.455  | $2 \times 10^{-7}$    |
|                             | HLF                  | humanTF |               |                        | 3.53%           | 0.430  | $2.99 \times 10^{-6}$ |
|                             | HMGB3                | humanTF |               |                        | 6.44%           | -0.409 | $3.74 \times 10^{-5}$ |
|                             | ARNTL2               | humanTF |               |                        | 2.54%           | 0.461  | $9.89 \times 10^{-5}$ |
|                             | NFYC                 | humanTF |               |                        | 2.56%           | 1.077  | $5.19 \times 10^{-4}$ |
|                             | PATZ1                | humanTF |               |                        | 1.16%           | -0.448 | $2.70 \times 10^{-2}$ |
| CYP3A7                      |                      |         | 25.96%        | $6.04 \times 10^{-13}$ |                 |        |                       |
|                             | CREB3L3              | humanTF |               |                        | 3.89%           | -0.323 | $4.33 \times 10^{-3}$ |
|                             | ZBTB47               | humanTF |               |                        | 21.53%          | -0.854 | $1.13 \times 10^{-2}$ |
|                             | NR1I3                | humanTF |               |                        | 1.70%           | 0.299  | $3.71 \times 10^{-2}$ |
| Small Intestine ( n = 175 ) |                      |         |               |                        |                 |        |                       |
| Dependent Variable          | Independent Variable | Type    | Adj. R-Square | <i>p</i> -Value        | R-Square change | Beta   | <i>p</i> -Value       |
| CYP3A4                      |                      |         | 93.82%        | $9.00 \times 10^{-97}$ |                 |        |                       |
|                             | NR1I2                | humanTF |               |                        | 3.39%           | 1.763  | $3.68 \times 10^{-9}$ |
|                             | FOXA3                | humanTF |               |                        | 2.65%           | -1.215 | $1.26 \times 10^{-7}$ |
|                             | ATOH1                | humanTF |               |                        | 0.95%           | 0.755  | $4.05 \times 10^{-7}$ |
|                             | CREB3L3              | humanTF |               |                        | 83.27%          | 0.406  | $7.67 \times 10^{-6}$ |
|                             | FOXA1                | humanTF |               |                        | 0.34%           | -0.878 | $3.67 \times 10^{-4}$ |
|                             | BARX2                | humanTF |               |                        | 0.76%           | -0.616 | $7.63 \times 10^{-4}$ |

|        |        |         |        |                         |        |                        |
|--------|--------|---------|--------|-------------------------|--------|------------------------|
|        | ELF3   | humanTF |        | 0.35%                   | -0.486 | $9.43 \times 10^{-4}$  |
|        | ISX    | humanTF |        | 0.28%                   | 0.514  | $5.65 \times 10^{-3}$  |
|        | ZBTB7B | humanTF |        | 2.16%                   | 0.530  | $1.31 \times 10^{-2}$  |
| CYP3A5 |        |         | 96.01% | $1.84 \times 10^{-112}$ |        |                        |
|        | NR1I2  | humanTF |        | 92.65%                  | 0.784  | $1.83 \times 10^{-20}$ |
|        | FOXA3  | humanTF |        | 0.50%                   | -0.641 | $1.20 \times 10^{-8}$  |
|        | MNX1   | humanTF |        | 0.45%                   | 0.607  | $3.28 \times 10^{-6}$  |
|        | MLXIPL | humanTF |        | 0.92%                   | 0.189  | $2.94 \times 10^{-5}$  |
|        | KLF5   | humanTF |        | 0.23%                   | 0.263  | $3.31 \times 10^{-3}$  |
|        | TOX3   | humanTF |        | 0.61%                   | -0.274 | $8.02 \times 10^{-3}$  |
|        | FOXA1  | humanTF |        | 0.16%                   | -0.359 | $1.11 \times 10^{-2}$  |
|        | HNF1B  | humanTF |        | 0.58%                   | 0.310  | $1.73 \times 10^{-2}$  |
|        | ELF3   | humanTF |        | 0.12%                   | 0.158  | $2.18 \times 10^{-2}$  |
| CYP3A7 |        |         | 69.32% | $1.90 \times 10^{-40}$  |        |                        |
|        | NR6A1  | humanTF |        | 56.83%                  | 0.437  | $1.70 \times 10^{-5}$  |
|        | RAG1   | humanTF |        | 1.35%                   | 0.733  | $6.07 \times 10^{-5}$  |
|        | NPAS2  | humanTF |        | 2.01%                   | -0.262 | $5.50 \times 10^{-4}$  |
|        | ZNF823 | humanTF |        | 1.70%                   | -0.490 | $1.37 \times 10^{-3}$  |
|        | FOXD1  | humanTF |        | 0.87%                   | -0.204 | $6.52 \times 10^{-3}$  |
|        | NR3C2  | humanTF |        | 2.74%                   | 0.269  | $8.17 \times 10^{-3}$  |
|        | ZNF57  | humanTF |        | 1.09%                   | 0.317  | $1.38 \times 10^{-2}$  |
|        | TULP4  | humanTF |        | 4.14%                   | 0.236  | $3.91 \times 10^{-2}$  |
