# Supplementary material for: Transcription Factors and ncRNAs Associated with CYP3A Expression in Human Liver and Small Intestine Assessed with Weighted Gene Co-Expression Network Analysis
Source: Biomedicines. 2022 Nov 28;10(12):3061. doi: 10.3390/biomedicines10123061 (PMC9775998; doi:10.3390/biomedicines10123061)
Supplement: Supplementary file 1 [file biomedicines-10-03061-s001.zip › Table S8.XLSX]

## Sheet: Liver_CYP3A4
Table S8: Weight values between two lncRNAs and TFs.
From Node	To Node	Weight	direction	From Gene Name	To Gene Name
ENSG00000230435.1	ENSG00000160868.14	0.0686888	undirected	AC004160.4	CYP3A4
ENSG00000230435.1	ENSG00000197114.11	0.161049	undirected	AC004160.4	ZGPAT
ENSG00000230435.1	ENSG00000125520.13	0.158594	undirected	AC004160.4	SLC2A4RG
ENSG00000230435.1	ENSG00000184517.11	0.148631	undirected	AC004160.4	ZFP1
ENSG00000230435.1	ENSG00000144331.18	0.146789	undirected	AC004160.4	ZNF385B
ENSG00000230435.1	ENSG00000205143.2	0.140889	undirected	AC004160.4	ARID3C
ENSG00000230435.1	ENSG00000143257.11	0.132135	undirected	AC004160.4	NR1I3
ENSG00000230435.1	ENSG00000197905.8	0.130315	undirected	AC004160.4	TEAD4
ENSG00000230435.1	ENSG00000167491.17	0.123484	undirected	AC004160.4	GATAD2A
ENSG00000230435.1	ENSG00000162599.15	0.12229	undirected	AC004160.4	NFIA
ENSG00000230435.1	ENSG00000029153.14	0.114458	undirected	AC004160.4	ARNTL2
ENSG00000230435.1	ENSG00000100105.17	0.102791	undirected	AC004160.4	PATZ1
ENSG00000230435.1	ENSG00000100644.16	0.101936	undirected	AC004160.4	HIF1A
ENSG00000230435.1	ENSG00000107175.11	0.100228	undirected	AC004160.4	CREB3
ENSG00000230435.1	ENSG00000118922.17	0.0968522	undirected	AC004160.4	KLF12
ENSG00000230435.1	ENSG00000196693.14	0.0926219	undirected	AC004160.4	ZNF33B
ENSG00000230435.1	ENSG00000032219.18	0.0911502	undirected	AC004160.4	ARID4A
ENSG00000230435.1	ENSG00000169083.16	0.0875488	undirected	AC004160.4	AR
ENSG00000230435.1	ENSG00000144852.17	0.0873809	undirected	AC004160.4	NR1I2
ENSG00000230435.1	ENSG00000029993.14	0.0872576	undirected	AC004160.4	HMGB3
ENSG00000230435.1	ENSG00000091831.22	0.0852654	undirected	AC004160.4	ESR1
ENSG00000230435.1	ENSG00000151623.14	0.0838085	undirected	AC004160.4	NR3C2
ENSG00000230435.1	ENSG00000243678.11	0.0817243	undirected	AC004160.4	NME2
ENSG00000230435.1	ENSG00000105516.10	0.0810961	undirected	AC004160.4	DBP
ENSG00000230435.1	ENSG00000143365.17	0.0803393	undirected	AC004160.4	RORC
ENSG00000230435.1	ENSG00000189403.14	0.0801151	undirected	AC004160.4	HMGB1
ENSG00000230435.1	ENSG00000005436.13	0.0749469	undirected	AC004160.4	GCFC2
ENSG00000230435.1	ENSG00000175727.13	0.0749346	undirected	AC004160.4	MLXIP
ENSG00000230435.1	ENSG00000173041.11	0.0730342	undirected	AC004160.4	ZNF680
ENSG00000230435.1	ENSG00000138380.17	0.0727836	undirected	AC004160.4	CARF
ENSG00000230435.1	ENSG00000114853.13	0.0718321	undirected	AC004160.4	ZBTB47
ENSG00000230435.1	ENSG00000060138.12	0.0693585	undirected	AC004160.4	YBX3
ENSG00000230435.1	ENSG00000116990.10	0.068796	undirected	AC004160.4	MYCL
ENSG00000230435.1	ENSG00000108924.13	0.0672873	undirected	AC004160.4	HLF
ENSG00000230435.1	ENSG00000188313.12	0.0653073	undirected	AC004160.4	PLSCR1
ENSG00000230435.1	ENSG00000074219.13	0.0609347	undirected	AC004160.4	TEAD2
ENSG00000230435.1	ENSG00000060566.13	0.0607803	undirected	AC004160.4	CREB3L3
ENSG00000230435.1	ENSG00000172493.20	0.0582171	undirected	AC004160.4	AFF1
ENSG00000230435.1	ENSG00000156127.6	0.0581967	undirected	AC004160.4	BATF
ENSG00000229005.2	ENSG00000160868.14	0.15174	undirected	HNF4A-AS1	CYP3A4
ENSG00000229005.2	ENSG00000197114.11	0.16516	undirected	HNF4A-AS1	ZGPAT
ENSG00000229005.2	ENSG00000184517.11	0.160569	undirected	HNF4A-AS1	ZFP1
ENSG00000229005.2	ENSG00000205143.2	0.159136	undirected	HNF4A-AS1	ARID3C
ENSG00000229005.2	ENSG00000144331.18	0.157757	undirected	HNF4A-AS1	ZNF385B
ENSG00000229005.2	ENSG00000125520.13	0.156093	undirected	HNF4A-AS1	SLC2A4RG
ENSG00000229005.2	ENSG00000175727.13	0.15124	undirected	HNF4A-AS1	MLXIP
ENSG00000229005.2	ENSG00000107175.11	0.150598	undirected	HNF4A-AS1	CREB3
ENSG00000229005.2	ENSG00000060566.13	0.149897	undirected	HNF4A-AS1	CREB3L3
ENSG00000229005.2	ENSG00000162599.15	0.148526	undirected	HNF4A-AS1	NFIA
ENSG00000229005.2	ENSG00000167491.17	0.147549	undirected	HNF4A-AS1	GATAD2A
ENSG00000229005.2	ENSG00000118922.17	0.146746	undirected	HNF4A-AS1	KLF12
ENSG00000229005.2	ENSG00000169083.16	0.145545	undirected	HNF4A-AS1	AR
ENSG00000229005.2	ENSG00000188313.12	0.145229	undirected	HNF4A-AS1	PLSCR1
ENSG00000229005.2	ENSG00000197905.8	0.144231	undirected	HNF4A-AS1	TEAD4
ENSG00000229005.2	ENSG00000144852.17	0.143937	undirected	HNF4A-AS1	NR1I2
ENSG00000229005.2	ENSG00000060138.12	0.143758	undirected	HNF4A-AS1	YBX3
ENSG00000229005.2	ENSG00000074219.13	0.142164	undirected	HNF4A-AS1	TEAD2
ENSG00000229005.2	ENSG00000108924.13	0.14209	undirected	HNF4A-AS1	HLF
ENSG00000229005.2	ENSG00000151623.14	0.140947	undirected	HNF4A-AS1	NR3C2
ENSG00000229005.2	ENSG00000029153.14	0.140598	undirected	HNF4A-AS1	ARNTL2
ENSG00000229005.2	ENSG00000172493.20	0.140043	undirected	HNF4A-AS1	AFF1
ENSG00000229005.2	ENSG00000091831.22	0.139376	undirected	HNF4A-AS1	ESR1
ENSG00000229005.2	ENSG00000114853.13	0.13589	undirected	HNF4A-AS1	ZBTB47
ENSG00000229005.2	ENSG00000156127.6	0.13567	undirected	HNF4A-AS1	BATF
ENSG00000229005.2	ENSG00000189403.14	0.134447	undirected	HNF4A-AS1	HMGB1
ENSG00000229005.2	ENSG00000100105.17	0.134257	undirected	HNF4A-AS1	PATZ1
ENSG00000229005.2	ENSG00000029993.14	0.133977	undirected	HNF4A-AS1	HMGB3
ENSG00000229005.2	ENSG00000032219.18	0.133204	undirected	HNF4A-AS1	ARID4A
ENSG00000229005.2	ENSG00000116990.10	0.13207	undirected	HNF4A-AS1	MYCL
ENSG00000229005.2	ENSG00000105516.10	0.131922	undirected	HNF4A-AS1	DBP
ENSG00000229005.2	ENSG00000100644.16	0.130997	undirected	HNF4A-AS1	HIF1A
ENSG00000229005.2	ENSG00000005436.13	0.129708	undirected	HNF4A-AS1	GCFC2
ENSG00000229005.2	ENSG00000143257.11	0.12955	undirected	HNF4A-AS1	NR1I3
ENSG00000229005.2	ENSG00000243678.11	0.1287	undirected	HNF4A-AS1	NME2
ENSG00000229005.2	ENSG00000196693.14	0.128175	undirected	HNF4A-AS1	ZNF33B
ENSG00000229005.2	ENSG00000173041.11	0.126384	undirected	HNF4A-AS1	ZNF680
ENSG00000229005.2	ENSG00000138380.17	0.118662	undirected	HNF4A-AS1	CARF
ENSG00000229005.2	ENSG00000143365.17	0.114572	undirected	HNF4A-AS1	RORC

## Sheet: Liver_CYP3A5
Table S8: Weight values between two lncRNAs and TFs.
From Node	To Node	Weight	direction	From Gene Name	To Gene Name
ENSG00000250436.1	ENSG00000106258.13	0.111137	undirected	LINC02499	CYP3A5
ENSG00000250436.1	ENSG00000125520.13	0.167142	undirected	LINC02499	SLC2A4RG
ENSG00000250436.1	ENSG00000197114.11	0.166213	undirected	LINC02499	ZGPAT
ENSG00000250436.1	ENSG00000144331.18	0.15529	undirected	LINC02499	ZNF385B
ENSG00000250436.1	ENSG00000184517.11	0.153545	undirected	LINC02499	ZFP1
ENSG00000250436.1	ENSG00000205143.2	0.150816	undirected	LINC02499	ARID3C
ENSG00000250436.1	ENSG00000167491.17	0.140825	undirected	LINC02499	GATAD2A
ENSG00000250436.1	ENSG00000197905.8	0.140794	undirected	LINC02499	TEAD4
ENSG00000250436.1	ENSG00000162599.15	0.137884	undirected	LINC02499	NFIA
ENSG00000250436.1	ENSG00000143257.11	0.130714	undirected	LINC02499	NR1I3
ENSG00000250436.1	ENSG00000029153.14	0.129285	undirected	LINC02499	ARNTL2
ENSG00000250436.1	ENSG00000144852.17	0.119111	undirected	LINC02499	NR1I2
ENSG00000250436.1	ENSG00000107175.11	0.117409	undirected	LINC02499	CREB3
ENSG00000250436.1	ENSG00000091831.22	0.116128	undirected	LINC02499	ESR1
ENSG00000250436.1	ENSG00000029993.14	0.114668	undirected	LINC02499	HMGB3
ENSG00000250436.1	ENSG00000032219.18	0.114588	undirected	LINC02499	ARID4A
ENSG00000250436.1	ENSG00000100644.16	0.114076	undirected	LINC02499	HIF1A
ENSG00000250436.1	ENSG00000100105.17	0.112796	undirected	LINC02499	PATZ1
ENSG00000250436.1	ENSG00000142528.15	0.112351	undirected	LINC02499	ZNF473
ENSG00000250436.1	ENSG00000114853.13	0.11231	undirected	LINC02499	ZBTB47
ENSG00000250436.1	ENSG00000118922.17	0.111947	undirected	LINC02499	KLF12
ENSG00000250436.1	ENSG00000005436.13	0.111626	undirected	LINC02499	GCFC2
ENSG00000250436.1	ENSG00000169083.16	0.111603	undirected	LINC02499	AR
ENSG00000250436.1	ENSG00000189403.14	0.111278	undirected	LINC02499	HMGB1
ENSG00000250436.1	ENSG00000188313.12	0.111276	undirected	LINC02499	PLSCR1
ENSG00000250436.1	ENSG00000105516.10	0.110206	undirected	LINC02499	DBP
ENSG00000250436.1	ENSG00000074219.13	0.109448	undirected	LINC02499	TEAD2
ENSG00000250436.1	ENSG00000196693.14	0.108753	undirected	LINC02499	ZNF33B
ENSG00000250436.1	ENSG00000175727.13	0.108063	undirected	LINC02499	MLXIP
ENSG00000250436.1	ENSG00000066136.20	0.107939	undirected	LINC02499	NFYC
ENSG00000250436.1	ENSG00000151623.14	0.107808	undirected	LINC02499	NR3C2
ENSG00000250436.1	ENSG00000243678.11	0.107451	undirected	LINC02499	NME2
ENSG00000250436.1	ENSG00000060566.13	0.107423	undirected	LINC02499	CREB3L3
ENSG00000250436.1	ENSG00000173041.11	0.107131	undirected	LINC02499	ZNF680
ENSG00000250436.1	ENSG00000108924.13	0.106449	undirected	LINC02499	HLF
ENSG00000250436.1	ENSG00000060138.12	0.106153	undirected	LINC02499	YBX3
ENSG00000250436.1	ENSG00000116990.10	0.104989	undirected	LINC02499	MYCL
ENSG00000250436.1	ENSG00000143365.17	0.10362	undirected	LINC02499	RORC
ENSG00000250436.1	ENSG00000138380.17	0.102669	undirected	LINC02499	CARF
ENSG00000272234.1	ENSG00000106258.13	0.0618813	undirected	CTD-2325A15.5	CYP3A5
ENSG00000272234.1	ENSG00000197114.11	0.148017	undirected	CTD-2325A15.5	ZGPAT
ENSG00000272234.1	ENSG00000144331.18	0.146266	undirected	CTD-2325A15.5	ZNF385B
ENSG00000272234.1	ENSG00000184517.11	0.146008	undirected	CTD-2325A15.5	ZFP1
ENSG00000272234.1	ENSG00000205143.2	0.141618	undirected	CTD-2325A15.5	ARID3C
ENSG00000272234.1	ENSG00000125520.13	0.140261	undirected	CTD-2325A15.5	SLC2A4RG
ENSG00000272234.1	ENSG00000167491.17	0.135514	undirected	CTD-2325A15.5	GATAD2A
ENSG00000272234.1	ENSG00000197905.8	0.129568	undirected	CTD-2325A15.5	TEAD4
ENSG00000272234.1	ENSG00000162599.15	0.124644	undirected	CTD-2325A15.5	NFIA
ENSG00000272234.1	ENSG00000029153.14	0.120196	undirected	CTD-2325A15.5	ARNTL2
ENSG00000272234.1	ENSG00000143257.11	0.112151	undirected	CTD-2325A15.5	NR1I3
ENSG00000272234.1	ENSG00000196693.14	0.108376	undirected	CTD-2325A15.5	ZNF33B
ENSG00000272234.1	ENSG00000118922.17	0.104746	undirected	CTD-2325A15.5	KLF12
ENSG00000272234.1	ENSG00000169083.16	0.102772	undirected	CTD-2325A15.5	AR
ENSG00000272234.1	ENSG00000100644.16	0.101357	undirected	CTD-2325A15.5	HIF1A
ENSG00000272234.1	ENSG00000032219.18	0.0984716	undirected	CTD-2325A15.5	ARID4A
ENSG00000272234.1	ENSG00000100105.17	0.0984256	undirected	CTD-2325A15.5	PATZ1
ENSG00000272234.1	ENSG00000107175.11	0.0965686	undirected	CTD-2325A15.5	CREB3
ENSG00000272234.1	ENSG00000175727.13	0.0934711	undirected	CTD-2325A15.5	MLXIP
ENSG00000272234.1	ENSG00000151623.14	0.0919461	undirected	CTD-2325A15.5	NR3C2
ENSG00000272234.1	ENSG00000029993.14	0.0910365	undirected	CTD-2325A15.5	HMGB3
ENSG00000272234.1	ENSG00000138380.17	0.0882787	undirected	CTD-2325A15.5	CARF
ENSG00000272234.1	ENSG00000091831.22	0.0865464	undirected	CTD-2325A15.5	ESR1
ENSG00000272234.1	ENSG00000114853.13	0.0845107	undirected	CTD-2325A15.5	ZBTB47
ENSG00000272234.1	ENSG00000173041.11	0.0838481	undirected	CTD-2325A15.5	ZNF680
ENSG00000272234.1	ENSG00000060138.12	0.0812706	undirected	CTD-2325A15.5	YBX3
ENSG00000272234.1	ENSG00000144852.17	0.0805841	undirected	CTD-2325A15.5	NR1I2
ENSG00000272234.1	ENSG00000074219.13	0.0781457	undirected	CTD-2325A15.5	TEAD2
ENSG00000272234.1	ENSG00000060566.13	0.0771433	undirected	CTD-2325A15.5	CREB3L3
ENSG00000272234.1	ENSG00000189403.14	0.0759108	undirected	CTD-2325A15.5	HMGB1
ENSG00000272234.1	ENSG00000005436.13	0.0748853	undirected	CTD-2325A15.5	GCFC2
ENSG00000272234.1	ENSG00000066136.20	0.0747575	undirected	CTD-2325A15.5	NFYC
ENSG00000272234.1	ENSG00000105516.10	0.0745526	undirected	CTD-2325A15.5	DBP
ENSG00000272234.1	ENSG00000188313.12	0.0738918	undirected	CTD-2325A15.5	PLSCR1
ENSG00000272234.1	ENSG00000142528.15	0.0717543	undirected	CTD-2325A15.5	ZNF473
ENSG00000272234.1	ENSG00000243678.11	0.0714205	undirected	CTD-2325A15.5	NME2
ENSG00000272234.1	ENSG00000116990.10	0.0685658	undirected	CTD-2325A15.5	MYCL
ENSG00000272234.1	ENSG00000143365.17	0.0684576	undirected	CTD-2325A15.5	RORC
ENSG00000272234.1	ENSG00000108924.13	0.0666187	undirected	CTD-2325A15.5	HLF

## Sheet: Liver_CYP3A7
Table S8: Weight values between two lncRNAs and TFs.
From Node	To Node	Weight	direction	From Gene Name	To Gene Name
ENSG00000229005.2	ENSG00000160870.12	0.13335	undirected	HNF4A-AS1	CYP3A7
ENSG00000229005.2	ENSG00000197114.11	0.16516	undirected	HNF4A-AS1	ZGPAT
ENSG00000229005.2	ENSG00000184517.11	0.160569	undirected	HNF4A-AS1	ZFP1
ENSG00000229005.2	ENSG00000205143.2	0.159136	undirected	HNF4A-AS1	ARID3C
ENSG00000229005.2	ENSG00000144331.18	0.157757	undirected	HNF4A-AS1	ZNF385B
ENSG00000229005.2	ENSG00000125520.13	0.156093	undirected	HNF4A-AS1	SLC2A4RG
ENSG00000229005.2	ENSG00000175727.13	0.15124	undirected	HNF4A-AS1	MLXIP
ENSG00000229005.2	ENSG00000107175.11	0.150598	undirected	HNF4A-AS1	CREB3
ENSG00000229005.2	ENSG00000060566.13	0.149897	undirected	HNF4A-AS1	CREB3L3
ENSG00000229005.2	ENSG00000162599.15	0.148526	undirected	HNF4A-AS1	NFIA
ENSG00000229005.2	ENSG00000167491.17	0.147549	undirected	HNF4A-AS1	GATAD2A
ENSG00000229005.2	ENSG00000118922.17	0.146746	undirected	HNF4A-AS1	KLF12
ENSG00000229005.2	ENSG00000169083.16	0.145545	undirected	HNF4A-AS1	AR
ENSG00000229005.2	ENSG00000188313.12	0.145229	undirected	HNF4A-AS1	PLSCR1
ENSG00000229005.2	ENSG00000197905.8	0.144231	undirected	HNF4A-AS1	TEAD4
ENSG00000229005.2	ENSG00000144852.17	0.143937	undirected	HNF4A-AS1	NR1I2
ENSG00000229005.2	ENSG00000060138.12	0.143758	undirected	HNF4A-AS1	YBX3
ENSG00000229005.2	ENSG00000074219.13	0.142164	undirected	HNF4A-AS1	TEAD2
ENSG00000229005.2	ENSG00000108924.13	0.14209	undirected	HNF4A-AS1	HLF
ENSG00000229005.2	ENSG00000151623.14	0.140947	undirected	HNF4A-AS1	NR3C2
ENSG00000229005.2	ENSG00000029153.14	0.140598	undirected	HNF4A-AS1	ARNTL2
ENSG00000229005.2	ENSG00000091831.22	0.139376	undirected	HNF4A-AS1	ESR1
ENSG00000229005.2	ENSG00000142528.15	0.13671	undirected	HNF4A-AS1	ZNF473
ENSG00000229005.2	ENSG00000114853.13	0.13589	undirected	HNF4A-AS1	ZBTB47
ENSG00000229005.2	ENSG00000189403.14	0.134447	undirected	HNF4A-AS1	HMGB1
ENSG00000229005.2	ENSG00000100105.17	0.134257	undirected	HNF4A-AS1	PATZ1
ENSG00000229005.2	ENSG00000029993.14	0.133977	undirected	HNF4A-AS1	HMGB3
ENSG00000229005.2	ENSG00000032219.18	0.133204	undirected	HNF4A-AS1	ARID4A
ENSG00000229005.2	ENSG00000116990.10	0.13207	undirected	HNF4A-AS1	MYCL
ENSG00000229005.2	ENSG00000105516.10	0.131922	undirected	HNF4A-AS1	DBP
ENSG00000229005.2	ENSG00000100644.16	0.130997	undirected	HNF4A-AS1	HIF1A
ENSG00000229005.2	ENSG00000005436.13	0.129708	undirected	HNF4A-AS1	GCFC2
ENSG00000229005.2	ENSG00000143257.11	0.12955	undirected	HNF4A-AS1	NR1I3
ENSG00000229005.2	ENSG00000243678.11	0.1287	undirected	HNF4A-AS1	NME2
ENSG00000229005.2	ENSG00000196693.14	0.128175	undirected	HNF4A-AS1	ZNF33B
ENSG00000229005.2	ENSG00000173041.11	0.126384	undirected	HNF4A-AS1	ZNF680
ENSG00000229005.2	ENSG00000066136.20	0.124687	undirected	HNF4A-AS1	NFYC
ENSG00000229005.2	ENSG00000138380.17	0.118662	undirected	HNF4A-AS1	CARF
ENSG00000229005.2	ENSG00000143365.17	0.114572	undirected	HNF4A-AS1	RORC
ENSG00000262881.1	ENSG00000160870.12	0.0958438	undirected	RP11-669E14.4	CYP3A7
ENSG00000262881.1	ENSG00000197114.11	0.168649	undirected	RP11-669E14.4	ZGPAT
ENSG00000262881.1	ENSG00000125520.13	0.167943	undirected	RP11-669E14.4	SLC2A4RG
ENSG00000262881.1	ENSG00000144331.18	0.151353	undirected	RP11-669E14.4	ZNF385B
ENSG00000262881.1	ENSG00000184517.11	0.151251	undirected	RP11-669E14.4	ZFP1
ENSG00000262881.1	ENSG00000205143.2	0.146536	undirected	RP11-669E14.4	ARID3C
ENSG00000262881.1	ENSG00000167491.17	0.133833	undirected	RP11-669E14.4	GATAD2A
ENSG00000262881.1	ENSG00000197905.8	0.131097	undirected	RP11-669E14.4	TEAD4
ENSG00000262881.1	ENSG00000143257.11	0.130631	undirected	RP11-669E14.4	NR1I3
ENSG00000262881.1	ENSG00000162599.15	0.128312	undirected	RP11-669E14.4	NFIA
ENSG00000262881.1	ENSG00000029153.14	0.126459	undirected	RP11-669E14.4	ARNTL2
ENSG00000262881.1	ENSG00000100644.16	0.111819	undirected	RP11-669E14.4	HIF1A
ENSG00000262881.1	ENSG00000100105.17	0.11085	undirected	RP11-669E14.4	PATZ1
ENSG00000262881.1	ENSG00000105516.10	0.105505	undirected	RP11-669E14.4	DBP
ENSG00000262881.1	ENSG00000066136.20	0.102976	undirected	RP11-669E14.4	NFYC
ENSG00000262881.1	ENSG00000005436.13	0.102185	undirected	RP11-669E14.4	GCFC2
ENSG00000262881.1	ENSG00000196693.14	0.102179	undirected	RP11-669E14.4	ZNF33B
ENSG00000262881.1	ENSG00000144852.17	0.101807	undirected	RP11-669E14.4	NR1I2
ENSG00000262881.1	ENSG00000029993.14	0.100727	undirected	RP11-669E14.4	HMGB3
ENSG00000262881.1	ENSG00000189403.14	0.100396	undirected	RP11-669E14.4	HMGB1
ENSG00000262881.1	ENSG00000143365.17	0.0999669	undirected	RP11-669E14.4	RORC
ENSG00000262881.1	ENSG00000091831.22	0.0996499	undirected	RP11-669E14.4	ESR1
ENSG00000262881.1	ENSG00000118922.17	0.0992544	undirected	RP11-669E14.4	KLF12
ENSG00000262881.1	ENSG00000032219.18	0.0991286	undirected	RP11-669E14.4	ARID4A
ENSG00000262881.1	ENSG00000142528.15	0.0989634	undirected	RP11-669E14.4	ZNF473
ENSG00000262881.1	ENSG00000116990.10	0.0988137	undirected	RP11-669E14.4	MYCL
ENSG00000262881.1	ENSG00000060566.13	0.098761	undirected	RP11-669E14.4	CREB3L3
ENSG00000262881.1	ENSG00000107175.11	0.0984894	undirected	RP11-669E14.4	CREB3
ENSG00000262881.1	ENSG00000188313.12	0.0979036	undirected	RP11-669E14.4	PLSCR1
ENSG00000262881.1	ENSG00000074219.13	0.0975739	undirected	RP11-669E14.4	TEAD2
ENSG00000262881.1	ENSG00000114853.13	0.0968694	undirected	RP11-669E14.4	ZBTB47
ENSG00000262881.1	ENSG00000243678.11	0.0954545	undirected	RP11-669E14.4	NME2
ENSG00000262881.1	ENSG00000173041.11	0.0940637	undirected	RP11-669E14.4	ZNF680
ENSG00000262881.1	ENSG00000151623.14	0.0926748	undirected	RP11-669E14.4	NR3C2
ENSG00000262881.1	ENSG00000169083.16	0.0912958	undirected	RP11-669E14.4	AR
ENSG00000262881.1	ENSG00000175727.13	0.0903229	undirected	RP11-669E14.4	MLXIP
ENSG00000262881.1	ENSG00000138380.17	0.088302	undirected	RP11-669E14.4	CARF
ENSG00000262881.1	ENSG00000060138.12	0.0881848	undirected	RP11-669E14.4	YBX3
ENSG00000262881.1	ENSG00000108924.13	0.0876517	undirected	RP11-669E14.4	HLF

## Sheet: SI_CYP3A4
Table S8: Weight values between two lncRNAs and TFs.
From Node	To Node	Weight	direction	From Gene Name	To Gene Name
ENSG00000224721.1	ENSG00000160868.14	0.313619	undirected	LOC102724153	CYP3A4
ENSG00000224721.1	ENSG00000166268.10	0.319305	undirected	LOC102724153	MYRFL
ENSG00000224721.1	ENSG00000135100.17	0.31653	undirected	LOC102724153	HNF1A
ENSG00000224721.1	ENSG00000172818.9	0.30403	undirected	LOC102724153	OVOL1
ENSG00000224721.1	ENSG00000130700.6	0.302021	undirected	LOC102724153	GATA5
ENSG00000224721.1	ENSG00000173153.13	0.298439	undirected	LOC102724153	ESRRA
ENSG00000224721.1	ENSG00000060566.13	0.296707	undirected	LOC102724153	CREB3L3
ENSG00000224721.1	ENSG00000116833.13	0.296697	undirected	LOC102724153	NR5A2
ENSG00000224721.1	ENSG00000125850.10	0.291788	undirected	LOC102724153	OVOL2
ENSG00000224721.1	ENSG00000164749.11	0.286765	undirected	LOC102724153	HNF4G
ENSG00000224721.1	ENSG00000144852.17	0.286439	undirected	LOC102724153	NR1I2
ENSG00000224721.1	ENSG00000265763.3	0.283518	undirected	LOC102724153	ZNF488
ENSG00000224721.1	ENSG00000167800.9	0.283223	undirected	LOC102724153	TBX10
ENSG00000224721.1	ENSG00000160685.13	0.278474	undirected	LOC102724153	ZBTB7B
ENSG00000224721.1	ENSG00000175329.12	0.277436	undirected	LOC102724153	ISX
ENSG00000224721.1	ENSG00000275410.4	0.27685	undirected	LOC102724153	HNF1B
ENSG00000224721.1	ENSG00000117595.10	0.271897	undirected	LOC102724153	IRF6
ENSG00000224721.1	ENSG00000132024.17	0.26991	undirected	LOC102724153	CC2D1A
ENSG00000224721.1	ENSG00000124920.13	0.265865	undirected	LOC102724153	MYRF
ENSG00000224721.1	ENSG00000012504.13	0.265329	undirected	LOC102724153	NR1H4
ENSG00000224721.1	ENSG00000111424.10	0.264586	undirected	LOC102724153	VDR
ENSG00000224721.1	ENSG00000141448.8	0.262952	undirected	LOC102724153	GATA6
ENSG00000224721.1	ENSG00000043039.6	0.262249	undirected	LOC102724153	BARX2
ENSG00000224721.1	ENSG00000119042.16	0.261474	undirected	LOC102724153	SATB2
ENSG00000224721.1	ENSG00000101076.16	0.258735	undirected	LOC102724153	HNF4A
ENSG00000224721.1	ENSG00000172238.4	0.256215	undirected	LOC102724153	ATOH1
ENSG00000224721.1	ENSG00000102554.13	0.255517	undirected	LOC102724153	KLF5
ENSG00000224721.1	ENSG00000103460.16	0.253196	undirected	LOC102724153	TOX3
ENSG00000224721.1	ENSG00000165556.9	0.246954	undirected	LOC102724153	CDX2
ENSG00000224721.1	ENSG00000083307.10	0.246669	undirected	LOC102724153	GRHL2
ENSG00000224721.1	ENSG00000130675.14	0.243815	undirected	LOC102724153	MNX1
ENSG00000224721.1	ENSG00000124664.10	0.243102	undirected	LOC102724153	SPDEF
ENSG00000224721.1	ENSG00000108788.11	0.241227	undirected	LOC102724153	MLX
ENSG00000224721.1	ENSG00000163435.15	0.237019	undirected	LOC102724153	ELF3
ENSG00000224721.1	ENSG00000129514.5	0.234319	undirected	LOC102724153	FOXA1
ENSG00000224721.1	ENSG00000153814.11	0.234085	undirected	LOC102724153	JAZF1
ENSG00000224721.1	ENSG00000113722.16	0.232418	undirected	LOC102724153	CDX1
ENSG00000224721.1	ENSG00000170608.2	0.228112	undirected	LOC102724153	FOXA3
ENSG00000259230.1	ENSG00000160868.14	0.214052	undirected	LINC02323	CYP3A4
ENSG00000259230.1	ENSG00000135100.17	0.295039	undirected	LINC02323	HNF1A
ENSG00000259230.1	ENSG00000172818.9	0.294102	undirected	LINC02323	OVOL1
ENSG00000259230.1	ENSG00000166268.10	0.291837	undirected	LINC02323	MYRFL
ENSG00000259230.1	ENSG00000116833.13	0.286659	undirected	LINC02323	NR5A2
ENSG00000259230.1	ENSG00000130700.6	0.282917	undirected	LINC02323	GATA5
ENSG00000259230.1	ENSG00000173153.13	0.282885	undirected	LINC02323	ESRRA
ENSG00000259230.1	ENSG00000125850.10	0.282498	undirected	LINC02323	OVOL2
ENSG00000259230.1	ENSG00000275410.4	0.261296	undirected	LINC02323	HNF1B
ENSG00000259230.1	ENSG00000117595.10	0.260514	undirected	LINC02323	IRF6
ENSG00000259230.1	ENSG00000164749.11	0.255761	undirected	LINC02323	HNF4G
ENSG00000259230.1	ENSG00000175329.12	0.254928	undirected	LINC02323	ISX
ENSG00000259230.1	ENSG00000144852.17	0.253523	undirected	LINC02323	NR1I2
ENSG00000259230.1	ENSG00000111424.10	0.252051	undirected	LINC02323	VDR
ENSG00000259230.1	ENSG00000083307.10	0.248627	undirected	LINC02323	GRHL2
ENSG00000259230.1	ENSG00000043039.6	0.248198	undirected	LINC02323	BARX2
ENSG00000259230.1	ENSG00000160685.13	0.244396	undirected	LINC02323	ZBTB7B
ENSG00000259230.1	ENSG00000167800.9	0.243059	undirected	LINC02323	TBX10
ENSG00000259230.1	ENSG00000101076.16	0.24064	undirected	LINC02323	HNF4A
ENSG00000259230.1	ENSG00000012504.13	0.23841	undirected	LINC02323	NR1H4
ENSG00000259230.1	ENSG00000153814.11	0.238056	undirected	LINC02323	JAZF1
ENSG00000259230.1	ENSG00000119042.16	0.233251	undirected	LINC02323	SATB2
ENSG00000259230.1	ENSG00000265763.3	0.232613	undirected	LINC02323	ZNF488
ENSG00000259230.1	ENSG00000132024.17	0.228918	undirected	LINC02323	CC2D1A
ENSG00000259230.1	ENSG00000108788.11	0.22797	undirected	LINC02323	MLX
ENSG00000259230.1	ENSG00000103460.16	0.227666	undirected	LINC02323	TOX3
ENSG00000259230.1	ENSG00000124920.13	0.225919	undirected	LINC02323	MYRF
ENSG00000259230.1	ENSG00000129514.5	0.224886	undirected	LINC02323	FOXA1
ENSG00000259230.1	ENSG00000130675.14	0.221003	undirected	LINC02323	MNX1
ENSG00000259230.1	ENSG00000060566.13	0.220633	undirected	LINC02323	CREB3L3
ENSG00000259230.1	ENSG00000141448.8	0.218841	undirected	LINC02323	GATA6
ENSG00000259230.1	ENSG00000102554.13	0.212259	undirected	LINC02323	KLF5
ENSG00000259230.1	ENSG00000172238.4	0.212256	undirected	LINC02323	ATOH1
ENSG00000259230.1	ENSG00000165556.9	0.208434	undirected	LINC02323	CDX2
ENSG00000259230.1	ENSG00000124664.10	0.207047	undirected	LINC02323	SPDEF
ENSG00000259230.1	ENSG00000170608.2	0.202544	undirected	LINC02323	FOXA3
ENSG00000259230.1	ENSG00000163435.15	0.198611	undirected	LINC02323	ELF3
ENSG00000259230.1	ENSG00000113722.16	0.196785	undirected	LINC02323	CDX1

## Sheet: SI_CYP3A5
Table S8: Weight values between two lncRNAs and TFs.
From Node	To Node	Weight	direction	From Gene Name	To Gene Name
ENSG00000235523.1	ENSG00000106258.13	0.261094	undirected	RP11-63P12.7	CYP3A5
ENSG00000235523.1	ENSG00000166268.10	0.333967	undirected	RP11-63P12.7	MYRFL
ENSG00000235523.1	ENSG00000135100.17	0.325912	undirected	RP11-63P12.7	HNF1A
ENSG00000235523.1	ENSG00000130700.6	0.314219	undirected	RP11-63P12.7	GATA5
ENSG00000235523.1	ENSG00000172818.9	0.310116	undirected	RP11-63P12.7	OVOL1
ENSG00000235523.1	ENSG00000144852.17	0.307382	undirected	RP11-63P12.7	NR1I2
ENSG00000235523.1	ENSG00000173153.13	0.306389	undirected	RP11-63P12.7	ESRRA
ENSG00000235523.1	ENSG00000164749.11	0.30526	undirected	RP11-63P12.7	HNF4G
ENSG00000235523.1	ENSG00000125850.10	0.30096	undirected	RP11-63P12.7	OVOL2
ENSG00000235523.1	ENSG00000116833.13	0.298673	undirected	RP11-63P12.7	NR5A2
ENSG00000235523.1	ENSG00000175329.12	0.294434	undirected	RP11-63P12.7	ISX
ENSG00000235523.1	ENSG00000275410.4	0.293485	undirected	RP11-63P12.7	HNF1B
ENSG00000235523.1	ENSG00000117595.10	0.283123	undirected	RP11-63P12.7	IRF6
ENSG00000235523.1	ENSG00000111424.10	0.279147	undirected	RP11-63P12.7	VDR
ENSG00000235523.1	ENSG00000101076.16	0.277535	undirected	RP11-63P12.7	HNF4A
ENSG00000235523.1	ENSG00000012504.13	0.276972	undirected	RP11-63P12.7	NR1H4
ENSG00000235523.1	ENSG00000043039.6	0.275933	undirected	RP11-63P12.7	BARX2
ENSG00000235523.1	ENSG00000160685.13	0.271447	undirected	RP11-63P12.7	ZBTB7B
ENSG00000235523.1	ENSG00000167800.9	0.259094	undirected	RP11-63P12.7	TBX10
ENSG00000235523.1	ENSG00000083307.10	0.252316	undirected	RP11-63P12.7	GRHL2
ENSG00000235523.1	ENSG00000124920.13	0.252234	undirected	RP11-63P12.7	MYRF
ENSG00000235523.1	ENSG00000060566.13	0.250702	undirected	RP11-63P12.7	CREB3L3
ENSG00000235523.1	ENSG00000265763.3	0.250159	undirected	RP11-63P12.7	ZNF488
ENSG00000235523.1	ENSG00000132024.17	0.244731	undirected	RP11-63P12.7	CC2D1A
ENSG00000235523.1	ENSG00000102554.13	0.240465	undirected	RP11-63P12.7	KLF5
ENSG00000235523.1	ENSG00000108788.11	0.239839	undirected	RP11-63P12.7	MLX
ENSG00000235523.1	ENSG00000165556.9	0.235945	undirected	RP11-63P12.7	CDX2
ENSG00000235523.1	ENSG00000153814.11	0.231397	undirected	RP11-63P12.7	JAZF1
ENSG00000235523.1	ENSG00000103460.16	0.229518	undirected	RP11-63P12.7	TOX3
ENSG00000235523.1	ENSG00000130675.14	0.228797	undirected	RP11-63P12.7	MNX1
ENSG00000235523.1	ENSG00000172238.4	0.222103	undirected	RP11-63P12.7	ATOH1
ENSG00000235523.1	ENSG00000129514.5	0.219803	undirected	RP11-63P12.7	FOXA1
ENSG00000235523.1	ENSG00000131910.4	0.217367	undirected	RP11-63P12.7	NR0B2
ENSG00000235523.1	ENSG00000124664.10	0.217319	undirected	RP11-63P12.7	SPDEF
ENSG00000235523.1	ENSG00000009950.15	0.217171	undirected	RP11-63P12.7	MLXIPL
ENSG00000235523.1	ENSG00000113722.16	0.211384	undirected	RP11-63P12.7	CDX1
ENSG00000235523.1	ENSG00000116793.15	0.211292	undirected	RP11-63P12.7	PHTF1
ENSG00000235523.1	ENSG00000170608.2	0.201724	undirected	RP11-63P12.7	FOXA3
ENSG00000235523.1	ENSG00000163435.15	0.200775	undirected	RP11-63P12.7	ELF3
ENSG00000260704.1	ENSG00000106258.13	0.24177	undirected	LINC00543	CYP3A5
ENSG00000260704.1	ENSG00000172818.9	0.305002	undirected	LINC00543	OVOL1
ENSG00000260704.1	ENSG00000166268.10	0.303381	undirected	LINC00543	MYRFL
ENSG00000260704.1	ENSG00000135100.17	0.303067	undirected	LINC00543	HNF1A
ENSG00000260704.1	ENSG00000125850.10	0.298037	undirected	LINC00543	OVOL2
ENSG00000260704.1	ENSG00000130700.6	0.295324	undirected	LINC00543	GATA5
ENSG00000260704.1	ENSG00000116833.13	0.294097	undirected	LINC00543	NR5A2
ENSG00000260704.1	ENSG00000173153.13	0.290503	undirected	LINC00543	ESRRA
ENSG00000260704.1	ENSG00000275410.4	0.28448	undirected	LINC00543	HNF1B
ENSG00000260704.1	ENSG00000117595.10	0.281569	undirected	LINC00543	IRF6
ENSG00000260704.1	ENSG00000111424.10	0.276825	undirected	LINC00543	VDR
ENSG00000260704.1	ENSG00000175329.12	0.275368	undirected	LINC00543	ISX
ENSG00000260704.1	ENSG00000164749.11	0.272729	undirected	LINC00543	HNF4G
ENSG00000260704.1	ENSG00000144852.17	0.271161	undirected	LINC00543	NR1I2
ENSG00000260704.1	ENSG00000083307.10	0.269443	undirected	LINC00543	GRHL2
ENSG00000260704.1	ENSG00000043039.6	0.268642	undirected	LINC00543	BARX2
ENSG00000260704.1	ENSG00000101076.16	0.266273	undirected	LINC00543	HNF4A
ENSG00000260704.1	ENSG00000012504.13	0.255252	undirected	LINC00543	NR1H4
ENSG00000260704.1	ENSG00000102554.13	0.253766	undirected	LINC00543	KLF5
ENSG00000260704.1	ENSG00000172238.4	0.252907	undirected	LINC00543	ATOH1
ENSG00000260704.1	ENSG00000124920.13	0.251138	undirected	LINC00543	MYRF
ENSG00000260704.1	ENSG00000124664.10	0.251056	undirected	LINC00543	SPDEF
ENSG00000260704.1	ENSG00000165556.9	0.250185	undirected	LINC00543	CDX2
ENSG00000260704.1	ENSG00000129514.5	0.24783	undirected	LINC00543	FOXA1
ENSG00000260704.1	ENSG00000060566.13	0.24707	undirected	LINC00543	CREB3L3
ENSG00000260704.1	ENSG00000103460.16	0.247052	undirected	LINC00543	TOX3
ENSG00000260704.1	ENSG00000170608.2	0.246182	undirected	LINC00543	FOXA3
ENSG00000260704.1	ENSG00000130675.14	0.245961	undirected	LINC00543	MNX1
ENSG00000260704.1	ENSG00000163435.15	0.245653	undirected	LINC00543	ELF3
ENSG00000260704.1	ENSG00000113722.16	0.243401	undirected	LINC00543	CDX1
ENSG00000260704.1	ENSG00000153814.11	0.240361	undirected	LINC00543	JAZF1
ENSG00000260704.1	ENSG00000167800.9	0.240223	undirected	LINC00543	TBX10
ENSG00000260704.1	ENSG00000131910.4	0.239002	undirected	LINC00543	NR0B2
ENSG00000260704.1	ENSG00000108788.11	0.231432	undirected	LINC00543	MLX
ENSG00000260704.1	ENSG00000160685.13	0.230946	undirected	LINC00543	ZBTB7B
ENSG00000260704.1	ENSG00000009950.15	0.230208	undirected	LINC00543	MLXIPL
ENSG00000260704.1	ENSG00000132024.17	0.229823	undirected	LINC00543	CC2D1A
ENSG00000260704.1	ENSG00000265763.3	0.229309	undirected	LINC00543	ZNF488
ENSG00000260704.1	ENSG00000116793.15	0.202811	undirected	LINC00543	PHTF1

## Sheet: SI_CYP3A7
Table S8: Weight values between two lncRNAs and TFs.
From Node	To Node	Weight	direction	From Gene Name	To Gene Name
ENSG00000224417.2	ENSG00000160870.12	0.209257	undirected	RP11-503C24.6	CYP3A7
ENSG00000224417.2	ENSG00000171970.12	0.215015	undirected	RP11-503C24.6	ZNF57
ENSG00000224417.2	ENSG00000148200.16	0.214611	undirected	RP11-503C24.6	NR6A1
ENSG00000224417.2	ENSG00000110693.17	0.210895	undirected	RP11-503C24.6	SOX6
ENSG00000224417.2	ENSG00000107807.12	0.184012	undirected	RP11-503C24.6	TLX1
ENSG00000224417.2	ENSG00000153879.8	0.182832	undirected	RP11-503C24.6	CEBPG
ENSG00000224417.2	ENSG00000205922.4	0.182577	undirected	RP11-503C24.6	ONECUT3
ENSG00000224417.2	ENSG00000173757.9	0.178876	undirected	RP11-503C24.6	STAT5B
ENSG00000224417.2	ENSG00000186951.16	0.172157	undirected	RP11-503C24.6	PPARA
ENSG00000224417.2	ENSG00000178177.15	0.171614	undirected	RP11-503C24.6	LCORL
ENSG00000224417.2	ENSG00000155545.19	0.169997	undirected	RP11-503C24.6	MIER3
ENSG00000224417.2	ENSG00000251493.4	0.167404	undirected	RP11-503C24.6	FOXD1
ENSG00000224417.2	ENSG00000179195.15	0.166796	undirected	RP11-503C24.6	ZNF664
ENSG00000224417.2	ENSG00000162664.16	0.162394	undirected	RP11-503C24.6	ZNF326
ENSG00000224417.2	ENSG00000166349.9	0.154739	undirected	RP11-503C24.6	RAG1
ENSG00000224417.2	ENSG00000170485.16	0.151559	undirected	RP11-503C24.6	NPAS2
ENSG00000224417.2	ENSG00000130338.12	0.150117	undirected	RP11-503C24.6	TULP4
ENSG00000224417.2	ENSG00000151623.14	0.149132	undirected	RP11-503C24.6	NR3C2
ENSG00000224417.2	ENSG00000197933.12	0.136442	undirected	RP11-503C24.6	ZNF823
ENSG00000224417.2	ENSG00000168286.2	0.127082	undirected	RP11-503C24.6	THAP11
ENSG00000224417.2	ENSG00000196482.16	0.121387	undirected	RP11-503C24.6	ESRRG
ENSG00000224417.2	ENSG00000243943.9	0.107536	undirected	RP11-503C24.6	ZNF512
ENSG00000224417.2	ENSG00000122034.14	0.0928854	undirected	RP11-503C24.6	GTF3A
ENSG00000275897.1	ENSG00000160870.12	0.112817	undirected	RP11-94C24.13	CYP3A7
ENSG00000275897.1	ENSG00000148200.16	0.218144	undirected	RP11-94C24.13	NR6A1
ENSG00000275897.1	ENSG00000110693.17	0.215703	undirected	RP11-94C24.13	SOX6
ENSG00000275897.1	ENSG00000171970.12	0.213629	undirected	RP11-94C24.13	ZNF57
ENSG00000275897.1	ENSG00000153879.8	0.188577	undirected	RP11-94C24.13	CEBPG
ENSG00000275897.1	ENSG00000186951.16	0.179718	undirected	RP11-94C24.13	PPARA
ENSG00000275897.1	ENSG00000173757.9	0.176023	undirected	RP11-94C24.13	STAT5B
ENSG00000275897.1	ENSG00000107807.12	0.165325	undirected	RP11-94C24.13	TLX1
ENSG00000275897.1	ENSG00000178177.15	0.1495	undirected	RP11-94C24.13	LCORL
ENSG00000275897.1	ENSG00000205922.4	0.123246	undirected	RP11-94C24.13	ONECUT3
ENSG00000275897.1	ENSG00000179195.15	0.120543	undirected	RP11-94C24.13	ZNF664
ENSG00000275897.1	ENSG00000151623.14	0.106666	undirected	RP11-94C24.13	NR3C2
ENSG00000275897.1	ENSG00000170485.16	0.104779	undirected	RP11-94C24.13	NPAS2
ENSG00000275897.1	ENSG00000162664.16	0.10201	undirected	RP11-94C24.13	ZNF326
ENSG00000275897.1	ENSG00000251493.4	0.0942955	undirected	RP11-94C24.13	FOXD1
ENSG00000275897.1	ENSG00000155545.19	0.0935339	undirected	RP11-94C24.13	MIER3
ENSG00000275897.1	ENSG00000166349.9	0.0858265	undirected	RP11-94C24.13	RAG1
ENSG00000275897.1	ENSG00000243943.9	0.0857494	undirected	RP11-94C24.13	ZNF512
ENSG00000275897.1	ENSG00000197933.12	0.0805545	undirected	RP11-94C24.13	ZNF823
ENSG00000275897.1	ENSG00000130338.12	0.0773789	undirected	RP11-94C24.13	TULP4
ENSG00000275897.1	ENSG00000122034.14	0.0773519	undirected	RP11-94C24.13	GTF3A
ENSG00000275897.1	ENSG00000196482.16	0.0701003	undirected	RP11-94C24.13	ESRRG
ENSG00000275897.1	ENSG00000168286.2	0.0692358	undirected	RP11-94C24.13	THAP11
